# Supplementary material for: Formal nucleophilic pyrrolylmethylationviapalladium-based auto-tandem catalysis: switchable regiodivergent synthesis and remote chirality transfer
Source: Royal Society of Chemistry journal article supplement (doi:10.1039/d2sc05210e), 2022-01-01
Supplement: d2sc05210e1.pdf [file d2sc05210e1.pdf]

# Formal nucleophilic pyrrolylmethylation via palladium-based auto-tandem catalysis: switchable regiodivergent synthesis and remote chirality transfer

Zhi Chen,<sup>a</sup> Yu-Fan Li,<sup>a</sup> Shun-Zhong Tan,<sup>a</sup> Qin Ouyang,<sup>b</sup> Zhi-Chao Chen,<sup>\*a</sup> Wei Du,<sup>a</sup> and Ying-Chun Chen<sup>\*a,b</sup>

<sup>a</sup>Key Laboratory of Drug-Targeting and Drug Delivery System of the Education Ministry and Sichuan Province, and Sichuan Research Center for Drug Precision Industrial Technology, West China School of Pharmacy, Sichuan University, Chengdu 610041, China

<sup>b</sup>College of Pharmacy, Third Military Medical University, Shapingba, Chongqing 400038, China

E-mail: chenzhichao@scu.edu.cn; ycchen@scu.edu.cn

## Supplementary Information

|                                                                              |     |
|------------------------------------------------------------------------------|-----|
| 1. General methods.....                                                      | S1  |
| 2. Preparation and characterization of starting materials.....               | S2  |
| 3. Detailed screening conditions .....                                       | S8  |
| 4. General procedure for synthesis of products 4 .....                       | S11 |
| 5. General procedure for synthesis of 3-pyrrolylmethylation products 7 ..... | S20 |
| 6. General procedure for synthesis of 4-pyrrolylmethylation products 8 ..... | S33 |
| 7. Asymmetric auto-tandem catalytic reaction exploration.....                | S41 |
| 8. Asymmetric synthesis through remote chirality transfer .....              | S44 |
| 9. Exploration of other substrates .....                                     | S52 |
| 10. Synthetic transformations.....                                           | S55 |
| 11. Mechanism and regiodivergence studies .....                              | S58 |
| 12. Crystal data, ECD spectra and structural refinement .....                | S61 |
| 13. NMR, HRMS spectra and HPLC chromatograms.....                            | S67 |

## 1. General methods

Unless otherwise noted, all reactions were carried out at ambient temperature; when the reactions required heating, the heat source was oil bath.  $^1\text{H}$  NMR (400 or 600 MHz),  $^{13}\text{C}$  NMR (100 or 150 MHz) and  $^{19}\text{F}$  NMR (375 MHz) spectra were recorded on Varian INOVA-400/54, Agilent DD2-600/54 or Bruker Ascend<sup>TM</sup> 400 instruments (Chemical shifts were reported in ppm from tetramethylsilane with the solvent resonance as the internal standard in  $\text{CDCl}_3$  solution, unless otherwise noted). The following abbreviations were used to explain the multiplicities: s = singlet, d = doublet, t = triplet, dd = double doublet, dt = double triplet; m = multiplet, brs = broad singlet and coupling constants ( $J$ ) are reported in Hertz (Hz). High resolution mass spectra (HRMS) were recorded on a Waters SYNAPT G2, Agilent G1969-85000 or Shimadzu LCMS-IT-TOF using a time-of-flight mass spectrometer equipped with electrospray ionization (ESI) source. X-ray diffraction experiments were carried out on an Agilent Xcalibur or Bruker APEX-II CCD diffractometer, and the data obtained were deposited at the Cambridge Crystallographic Data Centre (CCDC 2184605 and 2184606). In each case, enantiomeric excess was determined by HPLC (Agilent Technologies: 1220 Infinity II, 1200 Series, 1260 Infinity) analysis on a chiral column in comparison with authentic racemate, using a using a Daicel chiralpak IB Column (250  $\times$  4.6 mm), Daicel chiralpak AS-H Column (250  $\times$  4.6 mm), Daicel Chiralpak AD-H Column (250  $\times$  4.6 mm) or Daicel Chiralpak IC Column (250  $\times$  4.6 mm). UV detection was monitored at 254 nm. The specific optical rotation was obtained from Rudolph Research Analytical Autopol I automatic polarimeter in  $\text{CHCl}_3$  solution at 25  $^\circ\text{C}$ . The melting point was obtained from WRX-4 Mel-Temp apparatus. Column chromatography was performed on silica gel (200–300 mesh) eluting with ethyl acetate (EtOAc)/petroleum ether. TLC was performed on glass-backed silica plates. UV light,  $\text{I}_2$ , and solution of potassium permanganate were used to visualize products or starting materials. All chemicals were used without purification as commercially available unless otherwise noted. Petroleum ether and EtOAc were distilled. Experiments involving moisture and/or air sensitive components were performed under a positive pressure of argon in oven-dried glassware equipped with a rubber septum inlet. Toluene was freshly distilled from  $\text{CaH}_2$  under an atmosphere of dry argon. Dry solvents and liquid reagents were transferred by oven-dried syringe.

## 2. Preparation and characterization of starting materials

The propargylamines **1**,<sup>1a,1b</sup> allylic carbonate **2**,<sup>1c</sup> aldehyde imines **3**,<sup>2</sup> 1,6-enynes **5**,<sup>3a,3b</sup> and **9**<sup>3c,3d</sup> were prepared according to the literature procedure. Compounds **1a–c**,<sup>1a,1b</sup> **2**,<sup>1c</sup> **3a–m**,<sup>2</sup> **5a**,<sup>3a</sup> **5b–c**,<sup>3b</sup> **9**<sup>3c</sup> and **17**<sup>3d</sup> are known compounds and the spectroscopic data were consistent with the literature report.

### 2.1 Preparation of 1,6-enyne **5**

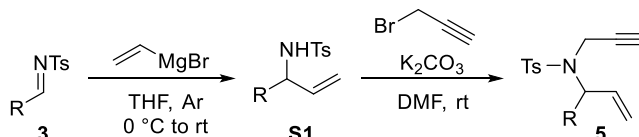

To a solution of aldimine **3** (4.0 mmol) in distilled THF (10.0 mL) was added vinylmagnesium bromide (5.0 mL, 1.25 equiv, 5.0 mmol, 1 M in THF) dropwise under argon atmosphere at 0 °C. The mixture was stirred for 2 h at room temperature. After completion (monitored by TLC), the reaction mixture was quenched with saturated NH<sub>4</sub>Cl aqueous solution and extracted with EtOAc (20.0 mL × 3). The combined organic layers were washed with brine (10.0 mL × 2), dried over Na<sub>2</sub>SO<sub>4</sub>, filtrated, and concentrated in vacuo. The residue was purified by flash chromatography on silica gel (EtOAc/petroleum ether = 1/10) to give **S1**. The allylic amine **S1** (2.0 mmol) was dissolved in DMF (5.0 mL) and potassium carbonate (0.30 g, 1.1 equiv, 2.2 mmol) was added. The mixture was stirred at room temperature for 10 min before propargyl bromide (0.20 mL, 1.1 equiv, 2.2 mmol) was added. The mixture was stirred at room temperature overnight. After completion (monitored by TLC), the reaction was quenched with water and extracted with EtOAc (20.0 mL × 3). The combined organic layers were washed with brine (10.0 mL × 2), dried over Na<sub>2</sub>SO<sub>4</sub>, filtrated, and concentrated in vacuo. The residue was purified by flash chromatography on silica gel (EtOAc/petroleum ether = 1/20) to give 1,6-enyne substrate **5**.

### Characterization for selected 1,6-enynes **5**

**4-Methyl-N-(prop-2-yn-1-yl)-N-(1-(p-tolyl)allyl)benzenesulfonamide (5d)**: white solid, 400 mg, 72% yield for two steps; mp 74–76 °C; <sup>1</sup>H NMR (400 MHz, CDCl<sub>3</sub>): δ (ppm) 7.80 (d, *J* = 8.4 Hz, 2H), 7.26 (d, *J* = 8.0 Hz, 3H), 7.18 (d, *J* = 8.0 Hz, 2H), 7.11 (d, *J* = 8.0 Hz, 2H), 6.32–6.03 (m, 1H), 5.57 (d, *J* = 7.6 Hz, 1H), 5.23 (d, *J* = 10.2 Hz, 1H), 5.15 (d, *J* = 17.0 Hz, 1H), 4.14 (dd, *J* = 18.6, 2.4 Hz, 1H), 3.76 (dd, *J* = 18.6, 2.4 Hz, 1H), 2.42 (s, 3H), 2.33 (s, 3H), 2.03 (t, *J* = 2.4 Hz, 1H); <sup>13</sup>C NMR (100 MHz, CDCl<sub>3</sub>): δ (ppm) 143.3, 137.8, 137.7, 134.8, 134.2, 129.24, 129.20, 128.1, 127.9, 119.0, 79.5, 72.6, 63.6, 33.8, 21.6, 21.1;

HRMS (ESI-TOF)  $m/z$ :  $[M + Na]^+$  Calcd for  $C_{20}H_{21}NO_2SNa^+$  362.1185; Found 362.1192.

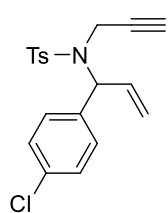

***N*-(1-(4-Chlorophenyl)allyl)-4-methyl-*N*-(prop-2-yn-1-yl)benzenesulfonamide** (5e):

white solid, 430 mg, 79% yield for two steps; mp 103–105 °C;  $^1H$  NMR (400 MHz,  $CDCl_3$ ):  $\delta$  (ppm) 7.77 (d,  $J = 8.2$  Hz, 2H), 7.33–7.17 (m, 6H), 6.23–6.07 (m, 1H), 5.56 (d,  $J = 7.6$  Hz, 1H), 5.27 (d,  $J = 10.4$  Hz, 1H), 5.15 (d,  $J = 17.0$  Hz, 1H),

4.13 (dd,  $J = 18.6, 2.6$  Hz, 1H), 3.81 (dd,  $J = 18.6, 2.6$  Hz, 1H), 2.43 (s, 3H), 2.05 (t,  $J = 2.4$  Hz, 1H);

$^{13}C$  NMR (100 MHz,  $CDCl_3$ ):  $\delta$  (ppm) 143.5, 137.4, 136.4, 133.9, 133.5, 129.6, 129.3, 128.7, 127.8,

119.8, 79.1, 73.0, 63.1, 34.0, 21.6; HRMS (ESI-TOF)  $m/z$ :  $[M + Na]^+$  Calcd for  $C_{19}H_{18}^{35}ClNO_2SNa^+$

382.0639; Found 382.0634; Calcd for  $C_{19}H_{18}^{37}ClNO_2SNa^+$  384.0609; Found 384.0608.

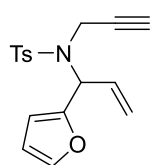

***N*-(1-(Furan-2-yl)allyl)-4-methyl-*N*-(prop-2-yn-1-yl)benzenesulfonamide** (5f):

white solid, 482 mg, 76% yield for two steps; mp 59–61 °C;  $^1H$  NMR (400 MHz,  $CDCl_3$ ):  $\delta$  (ppm) 7.81 (d,  $J = 8.4$  Hz, 2H), 7.28 (d,  $J = 8.0$  Hz, 2H), 7.26–7.24 (m, 1H),

7.02–6.80 (m, 2H), 6.32–6.12 (m, 1H), 5.81 (d,  $J = 7.0$  Hz, 1H), 5.38–5.21 (m, 2H), 4.17 (dd,  $J =$

18.6, 2.4 Hz, 1H), 3.88 (dd,  $J = 18.6, 2.4$  Hz, 1H), 2.43 (s, 3H), 2.05 (t,  $J = 2.4$  Hz, 1H);  $^{13}C$  NMR

(100 MHz,  $CDCl_3$ ):  $\delta$  (ppm) 143.5, 141.6, 137.4, 133.7, 129.3, 127.8, 127.1, 126.9, 126.2, 119.4, 79.3,

72.6, 59.6, 33.4, 21.6; HRMS (ESI-TOF)  $m/z$ :  $[M + Na]^+$  Calcd for  $C_{17}H_{17}NO_3SNa^+$  338.0821; Found

338.0829.

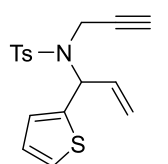

**4-Methyl-*N*-(prop-2-yn-1-yl)-*N*-(1-(thiophen-2-yl)allyl)benzenesulfonamide** (5g):

white solid, 476 mg, 73% yield for two steps; mp 62–64 °C;  $^1H$  NMR (400 MHz,  $CDCl_3$ ):  $\delta$  (ppm) 7.79 (d,  $J = 8.4$  Hz, 2H), 7.30–7.27 (m, 2H), 7.26 (d,  $J = 4.0$  Hz, 1H),

6.32–6.26 (m, 1H), 6.24–6.19 (m, 1H), 6.18–6.03 (m, 1H), 5.70 (d,  $J = 6.0$  Hz, 1H), 5.34 (d,  $J = 1.6$

Hz, 1H), 5.33–5.25 (m, 1H), 4.03 (dd,  $J = 18.4, 2.4$  Hz, 1H), 3.94 (dd,  $J = 18.4, 2.4$  Hz, 1H), 2.42 (s,

3H), 1.97 (t,  $J = 2.4$  Hz, 1H);  $^{13}C$  NMR (100 MHz,  $CDCl_3$ ):  $\delta$  (ppm) 150.7, 143.3, 142.6, 137.3, 132.5,

129.2, 127.8, 119.4, 110.3, 109.9, 78.9, 71.9, 57.3, 33.7, 21.6; HRMS (ESI-TOF)  $m/z$ :  $[M + Na]^+$

Calcd for  $C_{17}H_{17}NO_2S_2Na^+$  354.0593; Found 354.0601.

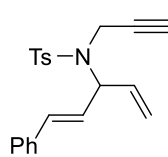

**(*E*)-4-Methyl-*N*-(1-phenylpenta-1,4-dien-3-yl)-*N*-(prop-2-yn-1-yl)benzenesulfon-**

**amide (5h):** white solid, 325 mg, 52% yield for two steps; mp 53–55 °C;  $^1H$  NMR

(400 MHz,  $CDCl_3$ ):  $\delta$  (ppm) 7.80 (d,  $J = 8.3$  Hz, 2H), 7.36–7.19 (m, 7H), 6.38 (d,  $J =$

1.2 Hz, 1H), 6.21 (dd,  $J = 16.0, 6.8$  Hz, 1H), 6.07–5.85 (m, 1H), 5.31–5.21 (m, 2H), 5.17–5.07 (m,

1H), 4.18 (dd,  $J = 18.4, 2.4$  Hz, 1H), 4.08 (dd,  $J = 18.4, 2.4$  Hz, 1H), 2.37 (s, 3H), 2.16 (t,  $J = 2.4$  Hz, 1H);  $^{13}\text{C}$  NMR (150 MHz,  $\text{CDCl}_3$ ):  $\delta$  (ppm) 143.4, 137.5, 136.2, 134.8, 133.8, 129.3, 128.5, 128.0, 127.8, 126.5, 125.5, 119.0, 79.9, 72.8, 61.8, 33.7, 21.5; HRMS (ESI-TOF)  $m/z$ :  $[\text{M} + \text{Na}]^+$  Calcd for  $\text{C}_{21}\text{H}_{21}\text{NO}_2\text{SNa}^+$  374.1185; Found 374.1186.

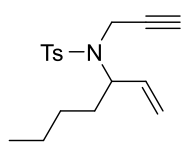

***N*-(Hept-1-en-3-yl)-4-methyl-*N*-(prop-2-yn-1-yl)benzenesulfonamide (5i):**

colorless oil, 388 mg, 65% yield for two steps;  $^1\text{H}$  NMR (400 MHz,  $\text{CDCl}_3$ ):  $\delta$  (ppm) 7.78 (d,  $J = 8.2$  Hz, 2H), 7.27 (d,  $J = 8.0$  Hz, 2H), 5.81–5.59 (m, 1H), 5.23–4.83 (m, 2H), 4.40–4.28 (m, 1H), 4.10 (dd,  $J = 18.6, 2.4$  Hz, 1H), 3.90 (dd,  $J = 18.6, 2.4$  Hz, 1H), 2.42 (s, 3H), 2.14 (t,  $J = 2.4$  Hz, 1H), 1.71–1.58 (m, 2H), 1.36–1.16 (m, 4H), 0.83 (t,  $J = 7.0$  Hz, 3H);  $^{13}\text{C}$  NMR (100 MHz,  $\text{CDCl}_3$ ):  $\delta$  (ppm) 143.2, 137.8, 136.0, 129.3, 127.6, 117.7, 79.9, 72.1, 60.0, 32.4, 31.4, 28.4, 22.3, 21.5, 13.9; HRMS (ESI-TOF)  $m/z$ :  $[\text{M} + \text{Na}]^+$  Calcd for  $\text{C}_{17}\text{H}_{23}\text{NO}_2\text{SNa}^+$  328.1342; Found 328.1344.

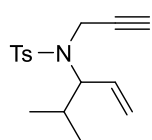

**4-Methyl-*N*-(4-methylpent-1-en-3-yl)-*N*-(prop-2-yn-1-yl)benzenesulfonamide (5j):**

white solid, 412 mg, 68% yield for two steps; mp 35–37 °C;  $^1\text{H}$  NMR (400 MHz,  $\text{CDCl}_3$ ):  $\delta$  (ppm) 7.75 (d,  $J = 8.2$  Hz, 2H), 7.25 (d,  $J = 9.2$  Hz, 2H), 5.83–5.65 (m, 1H), 5.07 (d,  $J = 10.4$  Hz, 1H), 4.98 (d,  $J = 17.2$  Hz, 1H), 4.05 (dd,  $J = 18.6, 2.6$  Hz, 1H), 3.99 (dd,  $J = 18.6, 2.6$  Hz, 1H), 3.94–3.86 (m, 1H), 2.40 (s, 3H), 2.13 (t,  $J = 2.6$  Hz, 1H), 2.03–1.87 (m, 1H), 0.99 (d,  $J = 6.6$  Hz, 3H), 0.89 (d,  $J = 6.6$  Hz, 3H);  $^{13}\text{C}$  NMR (100 MHz,  $\text{CDCl}_3$ ):  $\delta$  (ppm) 143.1, 137.7, 134.3, 129.2, 127.7, 119.2, 79.6, 72.5, 67.6, 33.1, 29.7, 21.5, 20.22, 20.17; HRMS (ESI-TOF)  $m/z$ :  $[\text{M} + \text{Na}]^+$  Calcd for  $\text{C}_{16}\text{H}_{21}\text{NO}_2\text{SNa}^+$  314.1185; Found 314.1194.

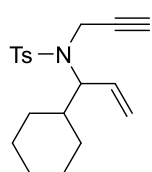

***N*-(1-Cyclohexylallyl)-4-methyl-*N*-(prop-2-yn-1-yl)benzenesulfonamide (5k):**

white solid, 476 mg, 78% yield for two steps; mp 69–72 °C;  $^1\text{H}$  NMR (400 MHz,  $\text{CDCl}_3$ ):  $\delta$  (ppm) 7.74 (d,  $J = 8.2$  Hz, 2H), 7.24 (d,  $J = 8.0$  Hz, 2H), 5.90–5.59 (m, 1H), 5.05 (d,  $J = 10.2$  Hz, 1H), 4.95 (d,  $J = 17.2$  Hz, 1H), 4.05 (dd,  $J = 18.4, 2.6$  Hz, 1H), 4.02–3.93 (m, 2H), 2.40 (s, 3H), 2.13 (t,  $J = 2.6$  Hz, 1H), 2.01–1.86 (m, 1H), 1.81–1.59 (m, 4H), 1.27–1.10 (m, 4H), 1.02–0.76 (m, 2H);  $^{13}\text{C}$  NMR (100 MHz,  $\text{CDCl}_3$ ):  $\delta$  (ppm) 143.1, 137.7, 134.0, 129.2, 127.7, 119.2, 79.6, 72.3, 66.5, 38.7, 33.0, 30.6, 30.3, 26.2, 26.1, 25.8, 21.5; HRMS (ESI-TOF)  $m/z$ :  $[\text{M} + \text{Na}]^+$  Calcd for  $\text{C}_{19}\text{H}_{25}\text{NO}_2\text{SNa}^+$  354.1498; Found 354.1507.

## 2.2 Preparation of chiral propargyl amine (S)-1

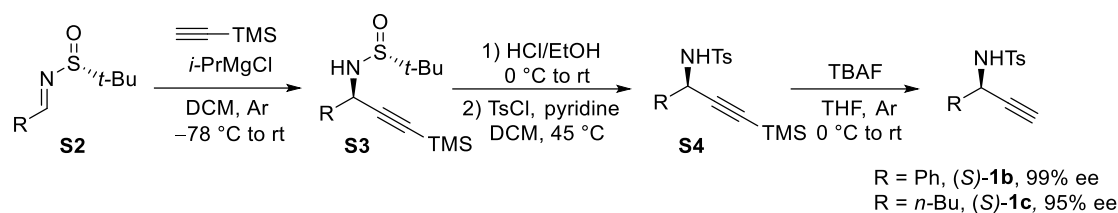

To a stirred solution of isopropylmagnesium chloride (10.0 mL, 2.0 equiv, 20.0 mmol, 2 M in THF) was added ethynyltrimethylsilane (3.4 mL, 2.4 equiv, 24 mmol) at 0 °C under argon atmosphere. The mixture was stirred for 30 min before warmed to room temperature, and stirred for another 10 min. The freshly prepared trimethylsilylethynylmagnesium chloride solution was added to a stirred solution of (*R<sub>S</sub>*)-*N*-benzylidene-2-methylpropane-2-sulfinamide **S2a** (2.09 g, 10.0 mmol) in dry DCM (50.0 mL) dropwise at -78 °C under argon atmosphere. The mixture was stirred at -78 °C for 2 h before warmed gradually to room temperature and stirred for another 5 h. After completion (monitored by TLC), the reaction was quenched with saturated NH<sub>4</sub>Cl solution and extracted with EtOAc (20.0 mL × 3). The combined organic layers were washed with brine (10.0 mL × 2), dried over Na<sub>2</sub>SO<sub>4</sub>, filtrated, and concentrated in vacuo. The residue was purified by flash chromatography on silica gel (EtOAc/petroleum ether = 1/10) to give **S3a**: 2.50 g (8.14 mmol), as a white solid, 81% yield.

Hydrogen chloride ethanol solution (4.0 mL, 2.0 equiv, 16 mmol, 4 M) was added to a stirred solution of **S3a** (2.46 g, 8.00 mmol) in ethanol (20.0 mL) at 0 °C. The mixture was stirred at room temperature for 2 h. After completion (monitored by TLC), ethanol was removed in vacuo. The residue was diluted with EtOAc (50.0 mL) and basified with 10% sodium hydroxide solution to pH 11. The organic layer was separated, washed with brine, dried over Na<sub>2</sub>SO<sub>4</sub>, filtrated, and concentrated in vacuo. The residue was dissolved in DCM (70.0 mL), tosyl chloride (2.30 g, 1.5 equiv, 12.0 mmol) and pyridine (1.9 mL, 3.0 equiv, 24 mmol) was added. The reaction mixture was stirred at 45 °C overnight. After completion, the reaction was quenched with water and extracted with DCM (20.0 mL × 3). The combined organic layers were washed with brine (10.0 mL × 2), dried over Na<sub>2</sub>SO<sub>4</sub>, filtrated, and concentrated in vacuo. The residue was purified by flash chromatography on silica gel (EtOAc/petroleum ether = 1/10 to 1/5) to give **S4a**: 1.70 g (4.76 mmol), as a white solid, 59% yield.

To a stirred solution of **S4a** (1.80 g, 5.03 mmol) in THF (20.0 mL) was added tetrabutylammonium fluoride solution (6.0 mL, 1.2 equiv, 6.0 mmol, 1 M in THF) under argon atmosphere at 0 °C. The mixture was stirred at 0 °C for 10 min. After completion (monitored by

TLC), the reaction mixture was quenched with saturated NH<sub>4</sub>Cl solution and extracted with EtOAc (20.0 mL × 3). The combined organic layers were washed with brine (10.0 mL × 2), dried over Na<sub>2</sub>SO<sub>4</sub>, filtrated, and concentrated in vacuo. The residue was purified by flash chromatography on silica gel (EtOAc/petroleum ether = 1/10 to 1/5) to give crude product (*S*)-**1b** as a white solid. The solid was dissolved in hot EtOAc (10.0 mL) and petroleum ether (5.0 mL), and the resultant solution was gradually cooled to room temperature and left for 1 h. The solid (*S*)-**1b** was collected by filtration: 1.10 g (3.85 mmol), as a white solid, 77% yield;  $[\alpha]_{\text{D}}^{25} = 27.0$  ( $c = 0.46$  in CHCl<sub>3</sub>); 99% ee, determined by HPLC analysis (Daicel chiralpak IB, *n*-hexane/*i*-PrOH = 95/5, flow rate = 1.0 mL/min,  $\lambda = 220$  nm)  $t_{\text{R}} = 21.08$  min (major),  $t_{\text{R}} = 23.23$  min (minor). The NMR spectra were consistent with the literature report.<sup>1b</sup>

The chiral propargyl amine (*S*)-**1c** was obtained as a white solid via the same procedure described above: 73% yield;  $[\alpha]_{\text{D}}^{25} = 44.3$  ( $c = 0.56$  in CHCl<sub>3</sub>); 95% ee, determined by HPLC analysis (Daicel chiralpak IC, *n*-hexane/*i*-PrOH = 90/10, flow rate = 1.0 mL/min,  $\lambda = 220$  nm)  $t_{\text{R}} = 14.54$  min (major),  $t_{\text{R}} = 17.34$  min (minor). The NMR spectra were consistent with the literature report.<sup>1b</sup>

### 2.3 Procedure for preparation of enantioenriched 1,6-enyne (*R*)-**5b**

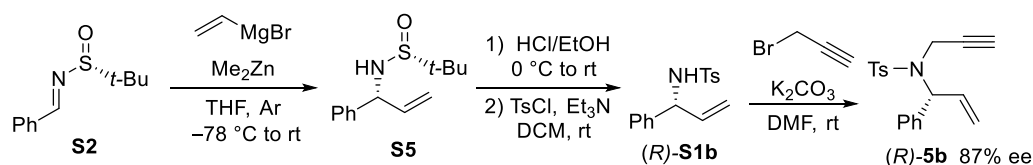

To a stirred solution of dimethylzinc (12.8 mL, 1.7 equiv, 12.8 mmol, 1 M in toluene) was added vinylmagnesium bromide (11.3 mL, 1.5 equiv, 11.3 mmol) at 0 °C under argon. The mixture was stirred at 0 °C for 30 min. The freshly prepared divinylzinc solution was added to a stirred solution of (*R,S*)-*N*-benzylidene-2-methylpropane-2-sulfonamide **S2** (1.57 g, 7.50 mmol) in distilled THF (35.0 mL) dropwise at -78 °C under argon atmosphere. The mixture was stirred at -78 °C for 2 h before warmed gradually to room temperature and stirred for another 5 h. After completion, the reaction was quenched with 0.5 M hydrochloric acid solution and extracted with EtOAc (20.0 mL × 3). The combined organic layers were washed with brine (10.0 mL × 2), dried over Na<sub>2</sub>SO<sub>4</sub>, filtrated, and concentrated in vacuo. The residue was purified by flash chromatography on silica gel (EtOAc/petroleum ether = 1/10) to give **S5**: 1.30 g (5.48 mmol), as a colorless oil, 73% yield.

Hydrogen chloride ethanol solution (2.5 mL, 2.0 equiv, 10 mmol, 4M) was added to a stirred

solution of **S5** (1.19 g, 5.02 mmol) in ethanol (15.0 mL) at 0 °C. The mixture was stirred at room temperature for 2 h. After completion (monitored by TLC), ethanol was removed in vacuo. The residue was diluted with EtOAc (50.0 mL) and basified with 10% sodium hydroxide solution to pH 11. The organic layer was separated, washed with brine, dried over Na<sub>2</sub>SO<sub>4</sub>, filtrated, and concentrated in vacuo. The residue was dissolved in DCM (60.0 mL), tosyl chloride (1.14 g, 1.2 equiv, 6.00 mmol) and triethylamine (1.4 mL, 2.0 equiv, 10 mmol) were added. The mixture was stirred at room temperature overnight. After completion (monitored by TLC), the reaction was quenched with water and extracted with DCM (20.0 mL × 3). The combined organic layers were washed with brine (10.0 mL × 2), dried over Na<sub>2</sub>SO<sub>4</sub>, filtrated, and concentrated in vacuo. The residue was purified by flash chromatography on silica gel (EtOAc/petroleum ether = 1/10 to 1/5) to give (*R*)-**S1b**: 1.03 g (3.58 mmol), as a yellow solid, 72% yield.

(*R*)-**S1b** (0.86 g, 3.0 mmol) and potassium carbonate (0.46 g, 1.1 equiv, 3.3 mmol) were added to DMF (10.0 mL). The mixture was stirred at room temperature for 10 min, and propargyl bromide (0.28 mL, 1.1 equiv, 3.3 mmol) was added. The mixture was stirred at room temperature overnight. After completion (monitored by TLC), the reaction was quenched with water and extracted with EtOAc (10.0 mL × 3). The combined organic layers were washed with brine (10.0 mL × 2), dried over Na<sub>2</sub>SO<sub>4</sub>, filtrated, and concentrated in vacuo. The residue was purified by flash chromatography on silica gel (EtOAc/petroleum ether = 1/20) to give (*R*)-**5b**: 0.80 g (2.4 mmol), as a white solid, 82% yield;  $[\alpha]_{\text{D}}^{25} = 16.9$  ( $c = 0.49$  in CHCl<sub>3</sub>); 87% ee, determined by HPLC analysis (Daicel chiralpak AS-H, *n*-hexane/*i*-PrOH = 90/10, flow rate = 1.0 mL/min,  $\lambda = 254$  nm)  $t_{\text{R}} = 16.56$  min (major),  $t_{\text{R}} = 23.75$  min (minor). The NMR spectra were consistent with the literature report.<sup>3b</sup>

- 1 (a) K. T. Sylvester and P. J. Chirik, *J. Am. Chem. Soc.*, 2009, **131**, 8772; (b) N. Li, P. Jia and Y. Huang, *Chem. Commun.*, 2019, **55**, 10976; (c) O. Lahtigui, F. Emmetiere, W. Zhang, L. Jirimo, S. Toledo-Roy, J. C. Hershberger, J. M. Macho and A. J. Grenning, *Angew. Chem., Int. Ed.*, 2016, **55**, 15792.
- 2 (a) H. Cai, Y. Zhou, D. Zhang, J. Xu and H. Liu, *Chem. Commun.*, 2014, **50**, 14771; (b) S. Morales, F. G. Guijarro, J. L. García Ruano and M. B. Cid, *J. Am. Chem. Soc.*, 2014, **136**, 1082.
- 3 (a) N. Cabrera-Lobera, M. T. Quirós, W. W. Brennessel, M. L. Neidig, E. Buñuel and D. J. Cárdenas, *Org. Lett.*, 2019, **21**, 6552; (b) D. Susanti, L.-J. Liu, W. Rao, S. Lin, D.-L. Ma, C.-H. Leung and P.



W. H. Chan, *Chem. Eur. J.*, 2015, **21**, 9111; (c) J.-P. Zhao, S.-C. Chan and C.-Y. Ho, *Tetrahedron*, 2015, **71**, 4426; (d) F. Malmedy and T. Wirth, *Eur. J. Org. Chem.*, 2017, 786.

### 3. Detailed screening conditions

**Table S3.1.** Detailed screening conditions for synthesis of **4a**<sup>a</sup>

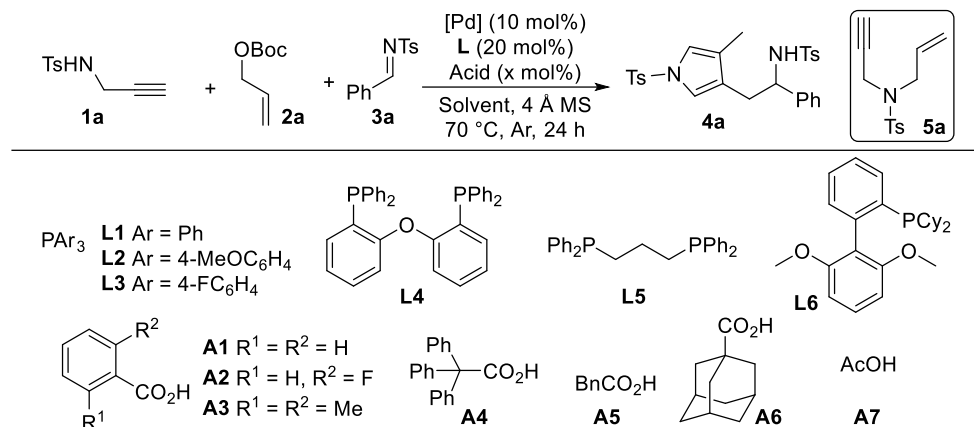

| Entry     | [Pd]                                   | L  | Acid      | x         | Solvent        | Yield (%) <sup>b</sup> |
|-----------|----------------------------------------|----|-----------|-----------|----------------|------------------------|
| 1         | Pd <sub>2</sub> dba <sub>3</sub>       | L1 | A1        | 20        | toluene        | 54                     |
| 2         | Pd <sub>2</sub> dba <sub>3</sub>       | L2 | A1        | 20        | toluene        | 53                     |
| 3         | Pd <sub>2</sub> dba <sub>3</sub>       | L3 | A1        | 20        | toluene        | NR                     |
| 4         | Pd <sub>2</sub> dba <sub>3</sub>       | L4 | A1        | 20        | toluene        | NR                     |
| 5         | Pd <sub>2</sub> dba <sub>3</sub>       | L5 | A1        | 20        | toluene        | NR                     |
| 6         | Pd <sub>2</sub> dba <sub>3</sub>       | L6 | A1        | 20        | toluene        | trace                  |
| 7         | Pd(PPh <sub>3</sub> ) <sub>4</sub>     | /  | A1        | 0         | toluene        | <b>5a, 95</b>          |
| 8         | Pd(PPh <sub>3</sub> ) <sub>4</sub>     | /  | A1        | 10        | toluene        | 50                     |
| 9         | Pd(PPh <sub>3</sub> ) <sub>4</sub>     | /  | A1        | 20        | toluene        | 58                     |
| 10        | Pd(PPh <sub>3</sub> ) <sub>4</sub>     | /  | A1        | 40        | toluene        | 68                     |
| 11        | Pd(PPh <sub>3</sub> ) <sub>4</sub>     | /  | A1        | 80        | toluene        | 68                     |
| 12        | Pd(PPh <sub>3</sub> ) <sub>4</sub>     | /  | A1        | 100       | toluene        | 64                     |
| <b>13</b> | <b>Pd(PPh<sub>3</sub>)<sub>4</sub></b> | /  | <b>A2</b> | <b>40</b> | <b>toluene</b> | <b>86</b>              |
| 14        | Pd(PPh <sub>3</sub> ) <sub>4</sub>     | /  | A3        | 40        | toluene        | 54                     |
| 15        | Pd(PPh <sub>3</sub> ) <sub>4</sub>     | /  | A4        | 40        | toluene        | 65                     |
| 16        | Pd(PPh <sub>3</sub> ) <sub>4</sub>     | /  | A5        | 40        | toluene        | 66                     |

|                 |                                    |   |           |    |         |       |
|-----------------|------------------------------------|---|-----------|----|---------|-------|
| 17              | Pd(PPh <sub>3</sub> ) <sub>4</sub> | / | <b>A6</b> | 40 | toluene | 47    |
| 18              | Pd(PPh <sub>3</sub> ) <sub>4</sub> | / | <b>A7</b> | 40 | toluene | 50    |
| 19              | Pd(PPh <sub>3</sub> ) <sub>4</sub> | / | <b>A2</b> | 40 | THF     | trace |
| 20              | Pd(PPh <sub>3</sub> ) <sub>4</sub> | / | <b>A2</b> | 40 | xylene  | 41    |
| 21 <sup>c</sup> | Pd(PPh <sub>3</sub> ) <sub>4</sub> | / | <b>A2</b> | 40 | toluene | 70    |
| 22 <sup>d</sup> | Pd(PPh <sub>3</sub> ) <sub>4</sub> | / | <b>A2</b> | 40 | toluene | 80    |
| 22 <sup>e</sup> | Pd(PPh <sub>3</sub> ) <sub>4</sub> | / | <b>A2</b> | 40 | toluene | 80    |

<sup>a</sup> Unless noted otherwise, reactions were performed with **1a** (0.1 mmol), **2a** (0.1 mmol), **3a** (0.05 mmol), [Pd] source (10 mol%), **L** (20 mol%), acid (x mol%) and 4 Å MS (20 mg) in degassed dry solvent (0.5 mL) at 70 °C for 24 h under Ar. <sup>b</sup> Yield of isolated product **4a**. <sup>c</sup> At 60 °C. <sup>d</sup> At 80 °C. <sup>e</sup> Without 4 Å MS. NR = no reaction.

**Table S3.2.** Detailed screening conditions for the regiodivergent tandem reaction<sup>a</sup>

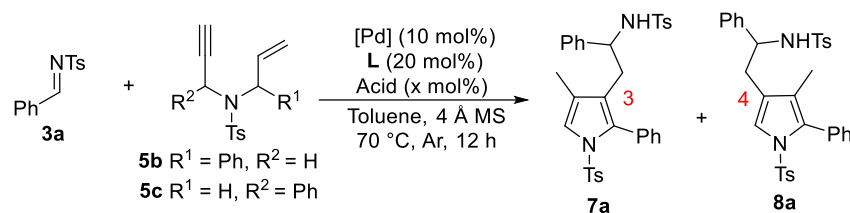

| Entry    | [Pd]                                                  | <b>L</b>         | Acid      | x          | Yield (%) <sup>b</sup> | rr <sup>c</sup> |
|----------|-------------------------------------------------------|------------------|-----------|------------|------------------------|-----------------|
| 1        | Pd(PPh <sub>3</sub> ) <sub>4</sub>                    | /                | <b>A1</b> | 20         | 75                     | 52:48           |
| 2        | Pd(PPh <sub>3</sub> ) <sub>4</sub>                    | /                | <b>A2</b> | 20         | 65                     | 63:37           |
| 3        | Pd(PPh <sub>3</sub> ) <sub>4</sub>                    | /                | <b>A3</b> | 20         | 60                     | 54:46           |
| 4        | Pd(PPh <sub>3</sub> ) <sub>4</sub>                    | /                | <b>A4</b> | 20         | 52                     | 69:31           |
| 5        | Pd(PPh <sub>3</sub> ) <sub>4</sub>                    | /                | <b>A1</b> | 50         | 90                     | 75:25           |
| <b>6</b> | <b>Pd(PPh<sub>3</sub>)<sub>4</sub></b>                | /                | <b>A1</b> | <b>100</b> | <b>91</b>              | <b>94:6</b>     |
| 7        | Pd(OAc) <sub>2</sub>                                  | /                | <b>A1</b> | 20         | 48                     | 60:40           |
| 8        | [Pd(allyl)Cl] <sub>2</sub>                            | PPh <sub>3</sub> | <b>A1</b> | 20         | 36                     | 67:33           |
| 9        | Pd(allyl)Cp                                           | PPh <sub>3</sub> | <b>A1</b> | 20         | 71                     | 13:87           |
| 10       | Pd(PPh <sub>3</sub> ) <sub>2</sub> Cl <sub>2</sub>    | PPh <sub>3</sub> | <b>A1</b> | 20         | NR                     | /               |
| 11       | Pd(MeCN) <sub>2</sub> Cl <sub>2</sub>                 | PPh <sub>3</sub> | <b>A1</b> | 20         | NR                     | /               |
| 12       | Pd(MeCN) <sub>2</sub> (BF <sub>4</sub> ) <sub>2</sub> | PPh <sub>3</sub> | <b>A1</b> | 20         | NR                     | /               |

|                 |                                    |                  |           |           |           |             |
|-----------------|------------------------------------|------------------|-----------|-----------|-----------|-------------|
| 13              | Pd(allyl)Cp                        | PPh <sub>3</sub> | <b>A2</b> | 20        | 80        | 40:60       |
| <b>14</b>       | <b>Pd(allyl)Cp</b>                 | PPh <sub>3</sub> | <b>A3</b> | <b>20</b> | <b>82</b> | <b>8:92</b> |
| 15              | Pd(allyl)Cp                        | PPh <sub>3</sub> | <b>A4</b> | 20        | 47        | 24:76       |
| 16              | Pd(allyl)Cp                        | PPh <sub>3</sub> | <b>A5</b> | 20        | trace     | /           |
| 17              | Pd(allyl)Cp                        | PPh <sub>3</sub> | <b>A6</b> | 20        | trace     | /           |
| 18              | Pd(allyl)Cp                        | PPh <sub>3</sub> | <b>A3</b> | 10        | 46        | 10:90       |
| 19              | Pd(allyl)Cp                        | PPh <sub>3</sub> | <b>A3</b> | 40        | 56        | 22:78       |
| 20              | Pd(allyl)Cp                        | PPh <sub>3</sub> | <b>A3</b> | 60        | 68        | 33:67       |
| 21              | Pd(allyl)Cp                        | PPh <sub>3</sub> | <b>A3</b> | 100       | 62        | 44:56       |
| 22 <sup>d</sup> | Pd(PPh <sub>3</sub> ) <sub>4</sub> | /                | <b>A1</b> | 100       | 87        | 96:4        |
| 23 <sup>d</sup> | Pd(allyl)Cp                        | PPh <sub>3</sub> | <b>A3</b> | 20        | 73        | 30:70       |
| 24 <sup>e</sup> | Pd(PPh <sub>3</sub> ) <sub>4</sub> | /                | <b>A2</b> | 40        | 80        | 95:5        |

<sup>a</sup>Unless noted otherwise, reactions were performed with 1,6-enyne **5b** (0.1 mmol), imine **3a** (0.05 mmol), [Pd] source (10 mol%), **L** (20 mol%), acid (x mol%) and 4 Å MS (20 mg) in degassed dry toluene (0.5 mL) at 70 °C for 12 h under Ar. <sup>b</sup> Isolated yield. <sup>c</sup> rr = **7a**:**8a**, determined by <sup>1</sup>H-NMR analysis. <sup>d</sup> With **5c** (0.1 mmol) instead of **5b**. <sup>e</sup> With **1b** (0.1 mmol) and **2a** (0.1 mmol) instead of **5b** at 80 °C for 96 h.

After identifying the optimal palladium source [Pd(allyl)Cp], acid additive (**A3**) for the synthesis of **8a**, other reaction parameters, such as solvent, temperature and concentration were further screened. The results were summarized in Table S3.3.

**Table S3.3.** Detailed screening conditions for the synthesis of **8a**<sup>a</sup>

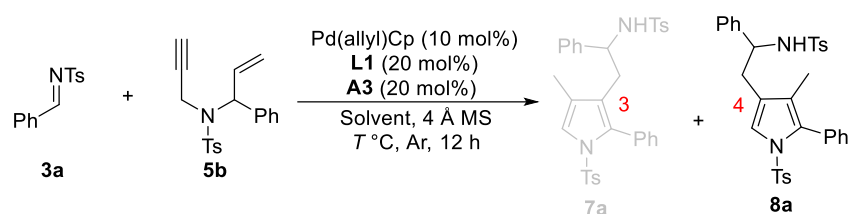

| Entry | Solvent | T (°C) | Conc.  | Yield (%) <sup>b</sup> | rr <sup>c</sup> |
|-------|---------|--------|--------|------------------------|-----------------|
| 1     | toluene | 60     | 0.1 M  | bad conv.              | /               |
| 2     | toluene | 60     | 0.2 M  | 38                     | 16:84           |
| 3     | toluene | 70     | 0.05 M | bad conv.              | /               |
| 4     | toluene | 70     | 0.2 M  | 66                     | 7:97            |

|   |                   |    |       |       |       |
|---|-------------------|----|-------|-------|-------|
| 5 | toluene           | 80 | 0.1 M | 55    | 27:73 |
| 6 | toluene           | 80 | 0.2 M | 48    | 16:84 |
| 7 | THF               | 70 | 0.1 M | trace | /     |
| 8 | xylene            | 70 | 0.1 M | 60    | 8:92  |
| 9 | PhCF <sub>3</sub> | 70 | 0.1 M | 43    | 19:81 |

<sup>a</sup> Unless noted otherwise, reactions were performed with 1,6-enyne **5b** (0.1 mmol), imine **3a** (0.05 mmol), Pd(allyl)Cp (10 mol%), PPh<sub>3</sub> (20 mol%), **A3** (20 mol%) and 4 Å MS (20 mg) in degassed dry solvent for 12 h under Ar. <sup>b</sup> Isolated yield of **8a**. <sup>c</sup> rr = **7a:8a**, determined by <sup>1</sup>H NMR analysis.

#### 4. General procedure for synthesis of products 4

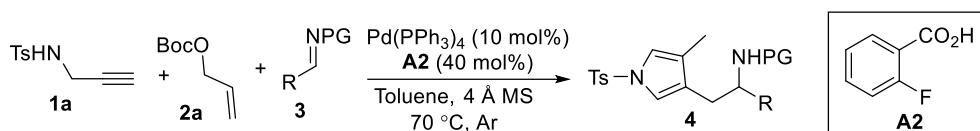

**General procedure A:** To an oven-dried 10 mL Schlenk tube equipped with a stirring bar were added 4-methyl-*N*-(prop-2-yn-1-yl)benzenesulfonamide **1a** (42.0 mg, 0.201 mmol), allyl *tert*-butyl carbonate **2a** (31.6 mg, 0.200 mmol), aldimine **3** (0.100 mmol), Pd(PPh<sub>3</sub>)<sub>4</sub> (11.6 mg, 0.0100 mmol, 10 mol%), **A2** (5.6 mg, 0.040 mmol, 40 mol%) and 4 Å MS (40 mg). The tube was capped, evacuated and back-filled with argon for five times. Then degassed dry toluene (1.0 mL) was added via syringe. The mixture was stirred at 70 °C for 24 h to 96 h, and monitored by TLC (EtOAc/petroleum ether = 1/5). After completion, the mixture was directly purified by flash chromatography on silica gel (EtOAc/petroleum ether = 1/5 to 1/4) to give product **4**.

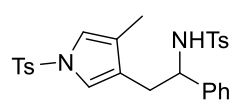

**Synthesis of 4a: General procedure A:** To an oven-dried 10 mL Schlenk tube equipped with a stirring bar were added 4-methyl-*N*-(prop-2-yn-1-yl)benzenesulfonamide **1a** (42.0 mg, 0.201 mmol), allyl *tert*-butyl carbonate **2a** (31.6 mg, 0.200 mmol), *N*-benzylidene-4-methylbenzenesulfonamide **3a** (25.9 mg, 0.100 mmol), Pd(PPh<sub>3</sub>)<sub>4</sub> (11.6 mg, 0.0100 mmol, 10 mol%), **A2** (5.6 mg, 0.040 mmol, 40 mol%) and 4 Å MS (40 mg). The tube was capped, evacuated and back-filled with argon for five times. Then degassed dry toluene (1.0 mL) was added via syringe. The mixture was stirred at 70 °C for 24 h, and monitored by TLC (EtOAc/petroleum ether = 1/5). After completion, the mixture was directly purified by flash chromatography on silica gel (EtOAc/petroleum ether = 1/5) to give product **4a**: 43.7 mg (0.0859 mmol), as a white solid, 86%

yield; mp 76–78 °C; <sup>1</sup>H NMR (400 MHz, CDCl<sub>3</sub>): δ (ppm) 7.63 (d, *J* = 8.2 Hz, 2H), 7.44 (d, *J* = 8.2 Hz, 2H), 7.27 (d, *J* = 9.8 Hz, 2H), 7.20–7.07 (m, 5H), 7.02–6.89 (m, 2H), 6.74–6.70 (m, 1H), 6.67–6.60 (m, 1H), 4.72 (d, *J* = 6.0 Hz, 1H), 4.31 (dt, *J* = 6.8, 6.6 Hz, 1H), 2.72 (d, *J* = 7.0 Hz, 2H), 2.40 (s, 3H), 2.38 (s, 3H), 1.64 (s, 3H); <sup>13</sup>C NMR (100 MHz, CDCl<sub>3</sub>): δ (ppm) 144.8, 143.3, 140.3, 136.9, 136.1, 129.9, 129.4, 128.4, 127.6, 127.0, 126.7, 126.5, 124.2, 123.6, 119.3, 118.4, 57.5, 33.7, 21.6, 21.5, 9.9; HRMS (ESI-TOF) *m/z*: [M + Na]<sup>+</sup> Calcd for C<sub>27</sub>H<sub>28</sub>N<sub>2</sub>O<sub>4</sub>S<sub>2</sub>Na<sup>+</sup> 531.1383; Found 531.1383.

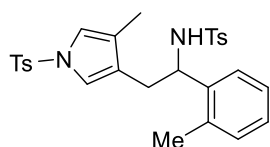

**Synthesis of 4b: General procedure A:** To an oven-dried 10 mL Schlenk tube

equipped with a stirring bar were added 4-methyl-*N*-(prop-2-yn-1-yl)benzenesulfonamide **1a** (42.0 mg, 0.201 mmol), allyl *tert*-butyl carbonate **2a** (31.6 mg, 0.200 mmol), 4-methyl-*N*-(2-methylbenzylidene)benzenesulfonamide **3b** (27.3 mg, 0.0999 mmol), Pd(PPh<sub>3</sub>)<sub>4</sub> (11.6 mg, 0.0100 mmol, 10 mol%), **A2** (5.6 mg, 0.040 mmol, 40 mol%) and 4 Å MS (40 mg). The tube was capped, evacuated and back-filled with argon for five times. Then degassed dry toluene (1.0 mL) was added via syringe. The mixture was stirred at 70 °C for 24 h, and monitored by TLC (EtOAc/petroleum ether = 1/5). After completion, the mixture was directly purified by flash chromatography on silica gel (EtOAc/petroleum ether = 1/5) to give product **4b**: 48.5 mg (0.0928 mmol), as a white solid, 93% yield; mp 49–50 °C; <sup>1</sup>H NMR (400 MHz, CDCl<sub>3</sub>): δ (ppm) 7.56 (d, *J* = 8.4 Hz, 2H), 7.36 (d, *J* = 8.2 Hz, 2H), 7.20 (d, *J* = 8.2 Hz, 2H), 7.02 (d, *J* = 8.0 Hz, 2H), 6.99–6.94 (m, 1H), 6.94–6.90 (m, 2H), 6.82 (d, *J* = 7.2 Hz, 1H), 6.68–6.63 (m, 1H), 6.54 (d, *J* = 2.4 Hz, 1H), 4.84 (d, *J* = 6.0 Hz, 1H), 4.48 (dt, *J* = 6.8, 6.4 Hz, 1H), 2.86–2.59 (m, 2H), 2.33 (s, 3H), 2.28 (s, 3H), 1.83 (s, 3H), 1.57 (d, *J* = 1.2 Hz, 3H); <sup>13</sup>C NMR (100 MHz, CDCl<sub>3</sub>): δ (ppm) 144.9, 143.1, 138.6, 136.9, 136.1, 134.8, 130.1, 129.9, 129.3, 127.2, 126.9, 126.7, 126.3, 125.8, 124.3, 123.6, 119.4, 118.2, 53.1, 33.0, 21.6, 21.4, 18.8, 9.8; HRMS (ESI-TOF) *m/z*: [M + Na]<sup>+</sup> Calcd for C<sub>28</sub>H<sub>30</sub>N<sub>2</sub>O<sub>4</sub>S<sub>2</sub>Na<sup>+</sup> 545.1539; Found 545.1537.

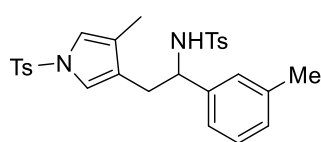

**Synthesis of 4c: General procedure A:** To an oven-dried 10 mL Schlenk

tube equipped with a stirring bar were added 4-methyl-*N*-(prop-2-yn-1-yl)benzenesulfonamide **1a** (42.0 mg, 0.201 mmol), allyl *tert*-butyl carbonate **2a** (31.6 mg, 0.200 mmol), 4-methyl-*N*-(3-methylbenzylidene)benzenesulfonamide **3c** (27.3 mg, 0.0999 mmol), Pd(PPh<sub>3</sub>)<sub>4</sub> (11.6 mg, 0.0100 mmol, 10 mol%), **A2** (5.6 mg, 0.040 mmol, 40 mol%) and 4 Å MS (40 mg). The tube was capped, evacuated and back-filled with argon for five times. Then degassed dry toluene (1.0 mL) was added via syringe. The mixture was stirred at 70 °C for 36 h, and

monitored by TLC (EtOAc/petroleum ether = 1/5). After completion, the mixture was directly purified by flash chromatography on silica gel (EtOAc/petroleum ether = 1/5) to give product **4c**: 36.8 mg (0.0704 mmol), as a white solid, 70% yield; mp 58–59 °C; <sup>1</sup>H NMR (400 MHz, CDCl<sub>3</sub>): δ (ppm) 7.56 (d, *J* = 8.2 Hz, 2H), 7.36 (d, *J* = 8.2 Hz, 2H), 7.23–7.18 (m, 2H), 7.04 (d, *J* = 8.0 Hz, 2H), 6.99–6.93 (m, 1H), 6.89 (d, *J* = 7.6 Hz, 1H), 6.69 (d, *J* = 7.6 Hz, 1H), 6.65–6.59 (m, 3H), 4.75–4.63 (m, 1H), 4.20 (d, *J* = 6.8 Hz, 1H), 2.63 (d, *J* = 7.0 Hz, 2H), 2.32 (s, 3H), 2.30 (s, 3H), 2.11 (s, 3H), 1.58 (s, 3H); <sup>13</sup>C NMR (100 MHz, CDCl<sub>3</sub>): δ (ppm) 144.9, 143.4, 138.9, 137.2, 136.3, 135.0, 130.3, 130.1, 129.5, 127.4, 127.1, 126.9, 126.5, 126.0, 124.5, 123.8, 119.6, 118.4, 53.4, 33.3, 21.8, 21.6, 19.1, 10.0; HRMS (ESI-TOF) *m/z*: [M + H]<sup>+</sup> Calcd for C<sub>28</sub>H<sub>31</sub>N<sub>2</sub>O<sub>4</sub>S<sub>2</sub><sup>+</sup> 523.1720; Found 523.1717.

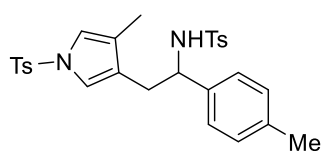

**Synthesis of 4d: General procedure A:** To an oven-dried 10 mL Schlenk

tube equipped with a stirring bar were added 4-methyl-*N*-(prop-2-yn-1-yl)benzenesulfonamide **1a** (42.0 mg, 0.201 mmol), allyl *tert*-butyl carbonate **2a** (31.6 mg, 0.200 mmol), 4-methyl-*N*-(4-methylbenzylidene)benzenesulfonamide **3d** (27.3 mg, 0.0999 mmol), Pd(PPh<sub>3</sub>)<sub>4</sub> (11.6 mg, 0.0100 mmol, 10 mol%), **A2** (5.6 mg, 0.040 mmol, 40 mol%) and 4 Å MS (40 mg). The tube was capped, evacuated and back-filled with argon for five times. Then degassed dry toluene (1.0 mL) was added via syringe. The mixture was stirred at 70 °C for 24 h, and monitored by TLC (EtOAc/petroleum ether = 1/5). After completion, the mixture was directly purified by flash chromatography on silica gel (EtOAc/petroleum ether = 1/5) to give product **4d**: 41.7 mg (0.0797 mmol), as a yellow solid, 80% yield; mp 52–54 °C; <sup>1</sup>H NMR (400 MHz, CDCl<sub>3</sub>): δ (ppm) 7.55 (d, *J* = 8.2 Hz, 2H), 7.37 (d, *J* = 8.0 Hz, 2H), 7.20 (d, *J* = 7.4 Hz, 2H), 7.05 (d, *J* = 8.0 Hz, 2H), 6.88 (d, *J* = 7.6 Hz, 2H), 6.77 (d, *J* = 7.8 Hz, 2H), 6.68–6.62 (m, 1H), 6.60–6.55 (m, 1H), 4.70–4.56 (m, 1H), 4.24–4.07 (m, 1H), 2.64 (d, *J* = 7.2 Hz, 2H), 2.33 (s, 3H), 2.31 (s, 3H), 2.21 (s, 3H), 1.58 (s, 3H); <sup>13</sup>C NMR (100 MHz, CDCl<sub>3</sub>): δ (ppm) 144.7, 143.2, 137.4, 137.2, 137.0, 136.2, 129.9, 129.4, 129.0, 127.0, 126.7, 126.4, 124.3, 123.9, 119.4, 118.3, 57.3, 33.7, 21.6, 21.5, 21.1, 9.9; HRMS (ESI-TOF) *m/z*: [M + H]<sup>+</sup> Calcd for C<sub>28</sub>H<sub>31</sub>N<sub>2</sub>O<sub>4</sub>S<sub>2</sub><sup>+</sup> 523.1720; Found 523.1720.

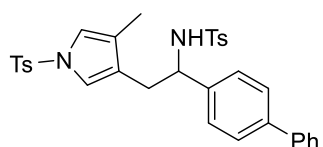

**Synthesis of 4e: General procedure A:** To an oven-dried 10 mL Schlenk

tube equipped with a stirring bar were added 4-phenyl-*N*-(prop-2-yn-1-yl)benzenesulfonamide **1a** (42.0 mg, 0.201 mmol), allyl *tert*-butyl carbonate **2a** (31.6 mg, 0.200 mmol), *N*-[(1,1'-biphenyl)-4-ylmethylene]-4-methylbenzene sulfonamide **3e** (33.5 mg, 0.0999 mmol), Pd(PPh<sub>3</sub>)<sub>4</sub> (11.6 mg, 0.0100 mmol, 10 mol%), **A2** (5.6 mg, 0.040 mmol, 40

mol%) and 4 Å MS (40 mg). The tube was capped, evacuated and back-filled with argon for five times. Then degassed dry toluene (1.0 mL) was added via syringe. The mixture was stirred at 70 °C for 24 h, and monitored by TLC (EtOAc/petroleum ether = 1/5). After completion, the mixture was directly purified by flash chromatography on silica gel (EtOAc/petroleum ether = 1/5) to give product **4e**: 46.4 mg (0.0794 mmol), as a white solid, 79% yield; mp 55–57 °C; <sup>1</sup>H NMR (400 MHz, CDCl<sub>3</sub>): δ (ppm) 7.54 (d, *J* = 8.0 Hz, 2H), 7.48–7.42 (m, 2H), 7.41–7.33 (m, 4H), 7.32–7.22 (m, 3H), 7.14 (d, *J* = 8.0 Hz, 2H), 7.03 (d, *J* = 8.0 Hz, 2H), 6.94 (d, *J* = 7.8 Hz, 2H), 6.66 (s, 1H), 6.63 (s, 1H), 4.85–4.72 (m, 1H), 4.29 (dt, *J* = 6.8, 6.4 Hz, 1H), 2.68 (d, *J* = 7.0 Hz, 2H), 2.29–2.22 (m, 6H), 1.62 (s, 3H); <sup>13</sup>C NMR (100 MHz, CDCl<sub>3</sub>): δ (ppm) 144.7, 143.2, 140.5, 140.4, 139.3, 136.9, 136.1, 129.9, 129.4, 128.8, 127.4, 127.01, 127.00, 126.97, 126.94, 126.6, 124.1, 123.6, 119.3, 118.4, 57.2, 33.6, 21.5, 21.4, 9.9; HRMS (ESI-TOF) *m/z*: [M + Na]<sup>+</sup> Calcd for C<sub>33</sub>H<sub>32</sub>N<sub>2</sub>O<sub>4</sub>S<sub>2</sub>Na<sup>+</sup> 607.1696; Found 607.1692.

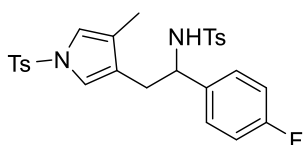

**Synthesis of 4f: General procedure A:** To an oven-dried 10 mL Schlenk tube equipped with a stirring bar were added 4-methyl-*N*-(prop-2-yn-1-yl)benzenesulfonamide **1a** (42.0 mg, 0.201 mmol), allyl *tert*-butyl carbonate **2a** (31.6 mg, 0.200 mmol), *N*-(4-fluorobenzylidene)-4-methylbenzenesulfonamide **3f** (27.7 mg, 0.0999 mmol), Pd(PPh<sub>3</sub>)<sub>4</sub> (11.6 mg, 0.0100 mmol, 10 mol%), **A2** (5.6 mg, 0.040 mmol, 40 mol%) and 4 Å MS (40 mg). The tube was capped, evacuated and back-filled with argon for five times. Then degassed dry toluene (1.0 mL) was added via syringe. The mixture was stirred at 70 °C for 24 h, and monitored by TLC (EtOAc/petroleum ether = 1/5). After completion, the mixture was directly purified by flash chromatography on silica gel (EtOAc/petroleum ether = 1/5) to give product **4f**: 35.6 mg (0.0676 mmol), as a white solid, 68% yield; mp 44–46 °C; <sup>1</sup>H NMR (400 MHz, CDCl<sub>3</sub>): δ (ppm) 7.56 (d, *J* = 8.4 Hz, 2H), 7.36 (d, *J* = 8.4 Hz, 2H), 7.20 (d, *J* = 9.8 Hz, 3H), 7.06 (d, *J* = 8.0 Hz, 2H), 6.89–6.80 (m, 2H), 6.76–6.67 (m, 2H), 6.69–6.64 (m, 1H), 6.58 (d, *J* = 2.4 Hz, 1H), 4.79 (d, *J* = 5.8 Hz, 1H), 4.22 (dt, *J* = 6.8, 6.4 Hz, 1H), 2.72–2.53 (m, 2H), 2.33 (s, 3H), 2.31 (s, 3H), 1.59 (d, *J* = 1.2 Hz, 3H); <sup>13</sup>C NMR (100 MHz, CDCl<sub>3</sub>): δ (ppm) 162.0 (d, <sup>1</sup>*J*<sub>FC</sub> = 246.2 Hz), 144.9, 143.4, 136.8, 136.2 (d, <sup>4</sup>*J*<sub>FC</sub> = 3.3 Hz), 136.0, 130.0, 129.4, 128.2 (d, <sup>3</sup>*J*<sub>FC</sub> = 8.2 Hz), 127.0, 126.7, 124.0, 123.4, 119.3, 118.5, 115.2 (d, <sup>2</sup>*J*<sub>FC</sub> = 21.4 Hz), 56.8, 33.8, 21.6, 21.5, 9.9; <sup>19</sup>F NMR (375 MHz, CDCl<sub>3</sub>): δ (ppm) –114.6; HRMS (ESI-TOF) *m/z*: [M + Na]<sup>+</sup> Calcd for C<sub>27</sub>H<sub>27</sub>FN<sub>2</sub>O<sub>4</sub>S<sub>2</sub>Na<sup>+</sup> 549.1288; Found 549.1287.

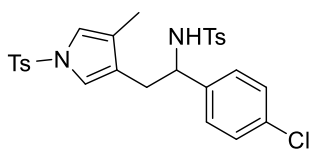

**Synthesis of 4g: General procedure A:** To an oven-dried 10 mL Schlenk tube equipped with a stirring bar were added 4-methyl-*N*-(prop-2-yn-1-yl)benzenesulfonamide **1a** (42.0 mg, 0.201 mmol), allyl *tert*-butyl carbonate

**2a** (31.6 mg, 0.200 mmol), *N*-(4-chlorobenzylidene)-4-methylbenzenesulfonamide **3g** (29.3 mg, 0.0997 mmol), Pd(PPh<sub>3</sub>)<sub>4</sub> (11.6 mg, 0.0100 mmol, 10 mol%), **A2** (5.6 mg, 0.040 mmol, 40 mol%) and 4 Å MS (40 mg). The tube was capped, evacuated and back-filled with argon for five times. Then degassed dry toluene (1.0 mL) was added via syringe. The mixture was stirred at 70 °C for 24 h, and monitored by TLC (EtOAc/petroleum ether = 1/5). After completion, the mixture was directly purified by flash chromatography on silica gel (EtOAc/petroleum ether = 1/5) to give product **4g**: 40.2 mg (0.0742 mmol), as a white solid, 74% yield; mp 53–54 °C; <sup>1</sup>H NMR (400 MHz, CDCl<sub>3</sub>): δ (ppm) 7.55 (d, *J* = 8.2 Hz, 2H), 7.35 (d, *J* = 8.0 Hz, 2H), 7.21 (d, *J* = 8.2 Hz, 2H), 7.05 (d, *J* = 8.0 Hz, 2H), 6.98 (d, *J* = 7.6 Hz, 2H), 6.80 (d, *J* = 8.4 Hz, 2H), 6.71–6.61 (m, 1H), 6.58 (d, *J* = 2.4 Hz, 1H), 4.87 (d, *J* = 5.8 Hz, 1H), 4.20 (dt, *J* = 6.8, 6.6 Hz, 1H), 3.81–3.63 (m, 1H), 2.68–2.52 (m, 2H), 2.34 (s, 3H), 2.32 (s, 3H), 1.59 (d, *J* = 1.2 Hz, 3H); <sup>13</sup>C NMR (100 MHz, CDCl<sub>3</sub>): δ (ppm) 144.9, 143.5, 138.9, 136.7, 136.0, 133.3, 130.0, 129.5, 128.4, 128.0, 127.0, 126.7, 123.9, 123.2, 119.3, 118.5, 56.9, 33.6, 21.6, 21.5, 9.9; HRMS (ESI-TOF) *m/z*: [M + Na]<sup>+</sup> Calcd for C<sub>27</sub>H<sub>27</sub><sup>35</sup>ClN<sub>2</sub>O<sub>4</sub>S<sub>2</sub>Na<sup>+</sup> 565.0993; Found 565.0993; Calcd for C<sub>27</sub>H<sub>27</sub><sup>37</sup>ClN<sub>2</sub>O<sub>4</sub>S<sub>2</sub>Na<sup>+</sup> 567.0969; Found 567.0978.

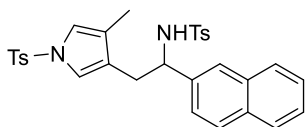

**Synthesis of 4h: General procedure A:** To an oven-dried 10 mL Schlenk tube equipped with a stirring bar were added 4-methyl-*N*-(prop-2-yn-1-yl)benzenesulfonamide **1a** (42.0 mg, 0.201 mmol), allyl *tert*-butyl carbonate

**2a** (31.6 mg, 0.200 mmol), 4-methyl-*N*-(naphthalen-2-ylmethylene) benzenesulfonamide **3h** (30.9 mg, 0.0999 mmol), Pd(PPh<sub>3</sub>)<sub>4</sub> (11.6 mg, 0.0100 mmol, 10 mol%), **A2** (5.6 mg, 0.040 mmol, 40 mol%) and 4 Å MS (40 mg). The tube was capped, evacuated and back-filled with argon for five times. Then degassed dry toluene (1.0 mL) was added via syringe. The mixture was stirred at 70 °C for 24 h, and monitored by TLC (EtOAc/petroleum ether = 1/5). After completion, the mixture was directly purified by flash chromatography on silica gel (EtOAc/petroleum ether = 1/5) to give product **4h**: 37.0 mg (0.0662 mmol), as a yellow solid, 66% yield; mp 150–152 °C; <sup>1</sup>H NMR (400 MHz, CDCl<sub>3</sub>): δ (ppm) 7.82–7.71 (m, 1H), 7.64–7.56 (m, 2H), 7.52 (d, *J* = 8.2 Hz, 2H), 7.47–7.37 (m, 4H), 7.32 (s, 1H), 7.16–7.07 (m, 3H), 6.97 (d, *J* = 8.0 Hz, 2H), 6.79–6.66 (m, 2H), 5.07–4.83 (m, 1H), 4.50 (dt, *J* = 6.8, 6.6 Hz, 1H), 2.83 (d, *J* = 7.2 Hz, 2H), 2.35 (s, 3H), 2.23 (s, 3H), 1.69 (s, 3H); <sup>13</sup>C NMR



(100 MHz, CDCl<sub>3</sub>):  $\delta$  (ppm) 144.7, 143.2, 137.4, 137.0, 136.1, 133.0, 132.8, 129.9, 129.3, 128.4, 127.9, 127.6, 127.0, 126.6, 126.2, 126.04, 125.96, 124.19, 124.16, 123.7, 119.5, 118.4, 57.7, 33.5, 21.6, 21.3, 10.1; HRMS (ESI-TOF)  $m/z$ :  $[M + Na]^+$  Calcd for C<sub>31</sub>H<sub>30</sub>N<sub>2</sub>O<sub>4</sub>S<sub>2</sub>Na<sup>+</sup> 581.1539; Found 581.1545.

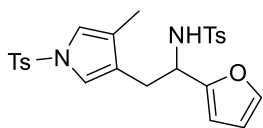

**Synthesis of 4i: General procedure A:** To an oven-dried 10 mL Schlenk tube equipped with a stirring bar were added 4-methyl-*N*-(prop-2-yn-1-yl) benzenesulfonamide **1a** (42.0 mg, 0.201 mmol), allyl *tert*-butyl carbonate **2a**

(31.6 mg, 0.200 mmol), *N*-(furan-2-ylmethylene)-4-methylbenzenesulfonamide **3i** (24.9 mg, 0.0999 mmol), Pd(PPh<sub>3</sub>)<sub>4</sub> (11.6 mg, 0.0100 mmol, 10 mol%), **A2** (5.6 mg, 0.040 mmol, 40 mol%) and 4 Å MS (40 mg). The tube was capped, evacuated and back-filled with argon for five times. Then degassed dry toluene (1.0 mL) was added via syringe. The mixture was stirred at 70 °C for 24 h, and monitored by TLC (EtOAc/petroleum ether = 1/5). After completion, the mixture was directly purified by flash chromatography on silica gel (EtOAc/petroleum ether = 1/5) to give product **4i**: 39.7 mg (0.0796 mmol), as a brown solid, 80% yield; mp 74–76 °C; <sup>1</sup>H NMR (400 MHz, CDCl<sub>3</sub>):  $\delta$  (ppm) 7.62 (d,  $J$  = 8.2 Hz, 2H), 7.55 (d,  $J$  = 8.0 Hz, 2H), 7.29–7.21 (m, 2H), 7.22–7.16 (m, 3H), 6.73 (s, 1H), 6.64 (s, 1H), 6.20–6.05 (m, 1H), 5.79 (d,  $J$  = 3.2 Hz, 1H), 4.84–4.72 (m, 1H), 4.48 (dt,  $J$  = 7.6, 7.4 Hz, 1H), 2.82 (d,  $J$  = 6.8 Hz, 2H), 2.40–2.37 (m, 6H), 1.75 (s, 3H); <sup>13</sup>C NMR (100 MHz, CDCl<sub>3</sub>):  $\delta$  (ppm) 152.3, 144.7, 143.3, 141.9, 137.3, 136.2, 129.9, 129.5, 126.9, 126.7, 124.3, 123.3, 119.4, 118.1, 110.2, 107.4, 51.6, 30.8, 21.6, 21.5, 9.9; HRMS (ESI-TOF)  $m/z$ :  $[M + Na]^+$  Calcd for C<sub>25</sub>H<sub>26</sub>N<sub>2</sub>O<sub>5</sub>S<sub>2</sub>Na<sup>+</sup> 521.1175; Found 521.1185.

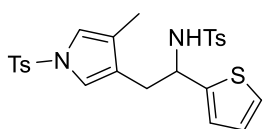

**Synthesis of 4j: General procedure A:** To an oven-dried 10 mL Schlenk tube equipped with a stirring bar were added, 4-methyl-*N*-(prop-2-yn-1-yl) benzenesulfonamide **1a** (42.0 mg, 0.201 mmol), allyl *tert*-butyl carbonate **2a**

(31.6 mg, 0.200 mmol), Pd(PPh<sub>3</sub>)<sub>4</sub> (11.6 mg, 0.0100 mmol, 10 mol%), 4-methyl-*N*-(thiophen-2-ylmethylene)benzenesulfonamide **3j** (26.5 mg, 0.0999 mmol), **A2** (5.6 mg, 0.040 mmol, 40 mol%) and 4 Å MS (40 mg). The tube was capped, evacuated and back-filled with argon for five times. Then degassed dry toluene (1.0 mL) was added via syringe. The mixture was stirred at 70 °C for 36 h, and monitored by TLC (EtOAc/petroleum ether = 1/5). After completion, the mixture was directly purified by flash chromatography on silica gel (EtOAc/petroleum ether = 1/5) to give product **4j**: 36.9 mg (0.0717 mmol), as a white solid, 72% yield; mp 54–56 °C; <sup>1</sup>H NMR (400 MHz, CDCl<sub>3</sub>):  $\delta$  (ppm)

7.54 (d,  $J = 8.2$  Hz, 2H), 7.47 (d,  $J = 8.2$  Hz, 2H), 7.21–7.17 (m, 2H), 7.11 (d,  $J = 8.0$  Hz, 2H), 7.03 (dd,  $J = 5.0, 1.2$  Hz, 1H), 6.71 (dd,  $J = 5.0, 3.6$  Hz, 1H), 6.67–6.64 (m, 1H), 6.63–6.60 (m, 1H), 6.55 (d,  $J = 3.4$  Hz, 1H), 4.69 (d,  $J = 6.8$  Hz, 1H), 4.64–4.53 (m, 1H), 2.76 (dd,  $J = 6.8, 2.6$  Hz, 2H), 2.33 (s, 3H), 2.32 (s, 3H), 1.69 (d,  $J = 1.2$  Hz, 3H);  $^{13}\text{C}$  NMR (100 MHz,  $\text{CDCl}_3$ ):  $\delta$  (ppm) 144.7, 144.2, 143.4, 137.1, 136.1, 129.9, 129.5, 127.0, 126.7, 126.6, 125.0, 124.8, 124.2, 123.3, 119.5, 118.2, 53.4, 34.2, 21.6, 21.5, 10.0; HRMS (ESI-TOF)  $m/z$ :  $[\text{M} + \text{Na}]^+$  Calcd for  $\text{C}_{25}\text{H}_{26}\text{N}_2\text{O}_4\text{S}_3\text{Na}^+$  537.0947; Found 537.0956.

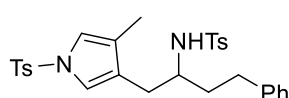

**Synthesis of 4k: General procedure A:** To an oven-dried 10 mL Schlenk

tube equipped with a stirring bar were added 4-methyl-*N*-(prop-2-yn-1-yl)benzenesulfonamide **1a** (42.0 mg, 0.201 mmol), allyl *tert*-butyl carbonate **2a** (31.6 mg, 0.200 mmol), 4-methyl-*N*-(3-phenylpropylidene)benzenesulfonamide **3k** (28.7 mg, 0.0999 mmol),  $\text{Pd}(\text{PPh}_3)_4$  (11.6 mg, 0.0100 mmol, 10 mol%), **A2** (5.6 mg, 0.040 mmol, 40 mol%) and 4 Å MS (40 mg). The tube was capped, evacuated and back-filled with argon for five times. Then degassed dry toluene (1.0 mL) was added via syringe. The mixture was stirred at 70 °C for 96 h, and monitored by TLC (EtOAc/petroleum ether = 1/5). After completion, the mixture was directly purified by flash chromatography on silica gel (EtOAc/petroleum ether = 1/5) to give product **4k**: 33.2 mg (0.0618 mmol), as a colorless oil, 62% yield;  $^1\text{H}$  NMR (400 MHz,  $\text{CDCl}_3$ ):  $\delta$  (ppm) 7.61 (d,  $J = 8.0$  Hz, 2H), 7.48 (d,  $J = 8.0$  Hz, 2H), 7.18–7.07 (m, 7H), 6.90 (d,  $J = 7.0$  Hz, 2H), 6.69 (s, 1H), 6.65 (s, 1H), 4.25 (d,  $J = 7.6$  Hz, 1H), 3.18 (dt,  $J = 6.8, 6.6$  Hz, 1H), 2.43–2.36 (m, 4H), 2.35 (s, 3H), 2.30 (s, 3H), 1.72–1.58 (m, 5H);  $^{13}\text{C}$  NMR (150 MHz,  $\text{CDCl}_3$ ):  $\delta$  (ppm) 144.8, 143.4, 141.0, 137.5, 136.2, 130.0, 129.7, 128.4, 128.3, 127.0, 126.7, 126.0, 124.15, 124.10, 119.1, 118.5, 52.9, 36.1, 31.5, 31.0, 21.6, 21.5, 10.2; HRMS (ESI-TOF)  $m/z$ :  $[\text{M} + \text{Na}]^+$  Calcd for  $\text{C}_{29}\text{H}_{32}\text{N}_2\text{O}_4\text{S}_2\text{Na}^+$  559.1696; Found 559.1686.

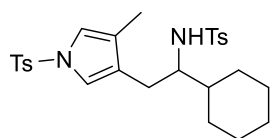

**Synthesis of 4l: General procedure A:** To an oven-dried 10 mL Schlenk tube

equipped with a stirring bar were added 4-methyl-*N*-(prop-2-yn-1-yl)benzenesulfonamide **1a** (42.0 mg, 0.201 mmol), allyl *tert*-butyl carbonate **2a** (31.6 mg, 0.200 mmol), *N*-(cyclohexylmethylene)-4-methylbenzenesulfonamide **3l** (26.5 mg, 0.0999 mmol),  $\text{Pd}(\text{PPh}_3)_4$  (11.6 mg, 0.0100 mmol, 10 mol%), **A2** (5.6 mg, 0.040 mmol, 40 mol%) and 4 Å MS (40 mg). The tube was capped, evacuated and back-filled with argon for five times. Then degassed dry toluene (1.0 mL) was added via syringe. The mixture was stirred at 70 °C for 96 h, and monitored by TLC (EtOAc/petroleum ether = 1/5). After completion, the mixture was directly purified by flash

chromatography on silica gel (EtOAc/petroleum ether = 1/5) to give product **4l**: 11.8 mg (0.0229 mmol), as a colorless oil, 23% yield;  $^1\text{H NMR}$  (400 MHz,  $\text{CDCl}_3$ ):  $\delta$  (ppm) 7.68 (d,  $J = 8.2$  Hz, 2H), 7.56 (d,  $J = 8.2$  Hz, 2H), 7.29–7.24 (m, 2H), 7.20 (d,  $J = 8.0$  Hz, 2H), 6.73 (d,  $J = 2.2$  Hz, 1H), 6.68 (s, 1H), 4.42–4.13 (m, 1H), 3.24–2.99 (m, 1H), 2.48–2.42 (m, 1H), 2.42 (s, 3H), 2.38 (s, 3H), 2.33–2.19 (m, 1H), 1.74 (s, 3H), 1.72–1.60 (m, 3H), 1.54–1.35 (m, 2H), 1.17–0.81 (m, 6H);  $^{13}\text{C NMR}$  (150 MHz,  $\text{CDCl}_3$ ):  $\delta$  (ppm) 144.7, 143.2, 137.6, 136.3, 129.9, 129.5, 126.9, 126.7, 124.8, 123.9, 118.9, 118.4, 58.1, 40.6, 28.8, 27.8, 27.6, 26.4, 26.2, 26.1, 21.6, 21.5, 10.2; HRMS (ESI-TOF)  $m/z$ :  $[\text{M} + \text{Na}]^+$  Calcd for  $\text{C}_{27}\text{H}_{34}\text{N}_2\text{O}_4\text{S}_2\text{Na}^+$  537.1852; Found 537.1846

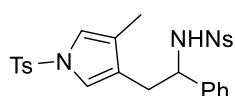

**Synthesis of 4m: General procedure A:** To an oven-dried 10 mL Schlenk tube

equipped with a stirring bar were added allyl *tert*-butyl carbonate **2a** (31.6 mg, 0.200 mmol), (*E*)-*N*-benzylidene-4-nitrobenzenesulfonamide **3m** (26.5 mg, 0.0999 mmol),  $\text{Pd}(\text{PPh}_3)_4$  (11.6 mg, 0.0100 mmol, 10 mol%), **A2** (5.6 mg, 0.040 mmol, 40 mol%) and 4 Å MS (40 mg). The tube was capped, evacuated and back-filled with argon for five times. Then degassed dry toluene (1.0 mL) was added via syringe. The mixture was stirred at 70 °C for 96 h, and monitored by TLC (EtOAc/petroleum ether = 1/5). After completion, the mixture was directly purified by flash chromatography on silica gel (EtOAc/petroleum ether = 1/5) to give product **4m**: 28.0 mg (0.0519 mmol), as a colorless thick oil, 52% yield:  $^1\text{H NMR}$  (400 MHz,  $\text{CDCl}_3$ ):  $\delta$  (ppm) 8.07 (d,  $J = 8.8$  Hz, 2H), 7.68–7.60 (m, 4H), 7.28 (d,  $J = 8.2$  Hz, 3H), 7.19–7.06 (m, 3H), 6.97–6.91 (m, 2H), 6.80–6.71 (m, 2H), 5.09 (d,  $J = 6.8$  Hz, 1H), 4.49 (dt,  $J = 7.0, 6.8$  Hz, 1H), 2.76 (d,  $J = 7.0$  Hz, 2H), 2.40 (s, 3H), 1.72 (s, 3H);  $^{13}\text{C NMR}$  (100 MHz,  $\text{CDCl}_3$ ):  $\delta$  (ppm) 149.6, 146.0, 144.9, 139.5, 136.0, 130.0, 128.5, 128.1, 128.0, 126.8, 126.5, 123.9, 123.8, 123.1, 119.3, 118.5, 57.9, 33.6, 21.6, 10.0; HRMS (ESI-TOF)  $m/z$ :  $[\text{M} + \text{Na}]^+$  Calcd for  $\text{C}_{26}\text{H}_{25}\text{N}_3\text{O}_6\text{S}_2\text{Na}^+$  562.1077; Found 562.1080.

### Reaction with aldimine bearing other protecting groups:

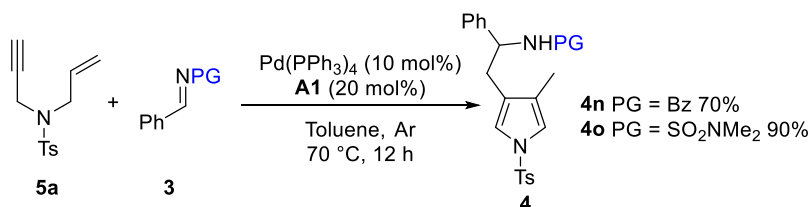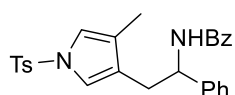

**Synthesis of 4n:** To an oven-dried 10 mL Schlenk tube equipped with a stirring

bar were added *N*-benzylidenebenzamide **3n** (20.9 mg, 0.0999 mmol), *N*-allyl-4-methyl-*N*-(prop-2-yn-1-yl)benzenesulfonamide **5a** (49.8 mg, 0.200 mmol),  $\text{Pd}(\text{PPh}_3)_4$  (11.6 mg,

0.0100 mmol, 10 mol%) and **A1** (2.4 mg, 0.020 mmol, 20 mol%). The tube was capped, evacuated and back-filled with argon for five times. Then degassed dry toluene (1.0 mL) was added via syringe. The mixture was stirred at 70 °C for 12 h, and monitored by TLC (EtOAc/petroleum ether = 1/5). After completion, the mixture was directly purified by flash chromatography on silica gel (EtOAc/petroleum ether = 1/6 to 1/5) to give product **4n**: 32.1 mg (0.0700 mmol), as a colorless thick oil, 70% yield: <sup>1</sup>H NMR (400 MHz, CDCl<sub>3</sub>): δ (ppm) 7.70 (d, *J* = 7.2 Hz, 2H), 7.56 (d, *J* = 8.2 Hz, 2H), 7.52–7.48 (m, 1H), 7.45–7.41 (m, 2H), 7.35–7.26 (m, 3H), 7.22–7.17 (m, 2H), 7.13 (d, *J* = 8.0 Hz, 2H), 6.81 (s, 1H), 6.76 (s, 1H), 6.38 (d, *J* = 7.8 Hz, 1H), 5.30 (d, *J* = 7.0 Hz, 1H), 3.04–2.86 (m, 2H), 2.35 (s, 3H), 1.82 (s, 3H); <sup>13</sup>C NMR (100 MHz, CDCl<sub>3</sub>): δ (ppm) 166.7, 144.5, 141.4, 136.2, 134.4, 131.6, 129.8, 128.73, 128.67, 127.6, 126.9, 126.62, 126.56, 124.71, 124.66, 119.1, 118.3, 53.5, 32.2, 21.6, 10.1; HRMS (ESI-TOF) *m/z*: [M + Na]<sup>+</sup> Calcd for C<sub>27</sub>H<sub>26</sub>N<sub>2</sub>O<sub>3</sub>SNa<sup>+</sup> 481.1556 Found 481.1556

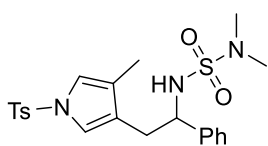

**Synthesis of 4o:** To an oven-dried 10 mL Schlenk tube equipped with a stirring bar were added imine **3o** (21.2 mg, 0.0999 mmol), *N*-allyl-4-methyl-*N*-(prop-2-yn-1-yl)benzenesulfonamide **5a** (49.8 mg, 0.200 mmol), Pd(PPh<sub>3</sub>)<sub>4</sub>

(11.6 mg, 0.0100 mmol, 10 mol%) and **A1** (2.4 mg, 0.020 mmol, 20 mol%). The tube was capped, evacuated and back-filled with argon for five times. Then degassed dry toluene (1.0 mL) was added via syringe. The mixture was stirred at 70 °C for 12 h, and monitored by TLC (EtOAc/petroleum ether = 1/5). After completion, the mixture was directly purified by flash chromatography on silica gel (EtOAc/petroleum ether = 1/6 to 1/5) to give product **4o**: 41.4 mg (0.0897 mmol), as a colorless thick oil, 90% yield: <sup>1</sup>H NMR (400 MHz, CDCl<sub>3</sub>): δ (ppm) 7.64 (d, *J* = 8.2 Hz, 2H), 7.31–7.25 (m, 5H), 7.20–7.09 (m, 2H), 6.85–6.74 (m, 2H), 4.59–4.50 (m, 1H), 4.45 (dt, *J* = 6.8, 6.6 Hz, 1H), 2.89–2.71 (m, 2H), 2.47 (s, 6H), 2.40 (s, 3H), 1.79 (s, 3H); <sup>13</sup>C NMR (100 MHz, CDCl<sub>3</sub>): δ (ppm) 144.7, 141.4, 136.1, 129.9, 128.6, 127.8, 126.7, 126.6, 124.4, 123.8, 119.6, 118.4, 57.8, 37.4, 33.8, 21.6, 10.0; HRMS (ESI-TOF) *m/z*: [M + Na]<sup>+</sup> Calcd for C<sub>22</sub>H<sub>27</sub>N<sub>3</sub>O<sub>4</sub>S<sub>2</sub>Na<sup>+</sup> 484.1335; Found 484.1335.

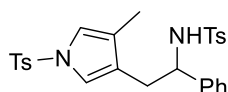

**Synthesis of 4a on a 1.0 mmol scale:** To an oven-dried 10 mL Schlenk tube equipped with a stirring bar were added 4-methyl-*N*-(prop-2-yn-1-yl)benzenesulfonamide **1a** (420.0 mg, 2.007 mmol), allyl *tert*-butyl carbonate **2a**

(316.4 mg, 2.000 mmol), *N*-benzylidene-4-methylbenzenesulfonamide **3a** (259.3 mg, 0.9999 mmol), Pd(PPh<sub>3</sub>)<sub>4</sub> (115.6 mg, 0.1000 mmol, 10 mol%), **A2** (56.0 mg, 0.400 mmol, 40 mol%) and 4 Å MS

(400 mg). The tube was capped, evacuated and back-filled with argon for five times. Then degassed dry toluene (10.0 mL) was added via syringe. The mixture was stirred at 70 °C for 24 h, and monitored by TLC (EtOAc/petroleum ether = 1/5). After completion, the solvent was removed in vacuo, and the residue was purified by flash chromatography on silica gel (EtOAc/petroleum ether = 1/5 to 1/4) to give product **4a**: 418.2 mg (0.8229 mmol), as a white solid, 82% yield.

### Reaction with a ketimine derived from isatin

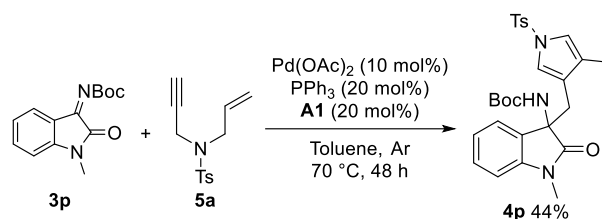

To an oven-dried 10 mL Schlenk tube equipped with a stirring bar were added *tert*-butyl (*E*)-(1-methyl-2-oxoindolin-3-ylidene)carbamate **3p** (26.0 mg, 0.0999 mmol), *N*-allyl-4-methyl-*N*-(prop-2-yn-1-yl)benzenesulfonamide **5a** (49.8 mg, 0.200 mmol), Pd(OAc)<sub>2</sub> (2.2 mg, 0.0098 mmol, 10 mol%), PPh<sub>3</sub> (5.2 mg, 0.020 mmol, 20 mol%) and **A1** (2.4 mg, 0.020 mmol, 20 mol%). The tube was capped, evacuated and back-filled with argon for five times. Then degassed dry toluene (1.0 mL) was added via syringe. The mixture was stirred at 70 °C for 48 h, and monitored by TLC (EtOAc/petroleum ether = 1/4). After completion, the mixture was directly purified by flash chromatography on silica gel (EtOAc/petroleum ether = 1/5 to 1/4) to give product **4p**: 22.4 mg (0.0439 mmol), as a yellow solid, 44% yield; mp 89–91 °C; <sup>1</sup>H NMR (400 MHz, CDCl<sub>3</sub>): δ (ppm) δ 7.61 (d, *J* = 8.2 Hz, 2H), 7.29 (d, *J* = 8.2 Hz, 2H), 7.26–7.19 (m, 1H), 7.13–7.05 (m, 1H), 7.05–6.97 (m, 1H), 6.71 (s, 1H), 6.52 (d, *J* = 7.8 Hz, 1H), 6.37 (s, 1H), 5.17 (d, *J* = 6.0 Hz, 1H), 2.96–2.86 (m, 4H), 2.86–2.79 (m, 1H), 2.42 (s, 3H), 1.67 (s, 3H), 1.22 (brs, 9H); <sup>13</sup>C NMR (100 MHz, CDCl<sub>3</sub>): δ (ppm) 176.2, 153.7, 144.7, 143.4, 136.1, 129.8, 128.9, 128.0, 126.9, 124.6, 122.8, 122.4, 120.2, 119.6, 117.4, 107.8, 80.5, 62.2, 32.9, 28.0, 25.9, 21.6, 10.0; HRMS (ESI-TOF) *m/z*: [M + Na]<sup>+</sup> Calcd for C<sub>27</sub>H<sub>31</sub>N<sub>3</sub>O<sub>5</sub>SNa<sup>+</sup> 532.1877; Found 532.1877.

## 5. General procedure for synthesis of 3-pyrrolylmethylation products **7**

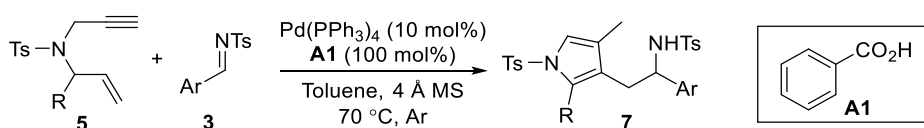

**General procedure B:** To an oven-dried 10 mL Schlenk tube equipped with a stirring bar were

added 1,6-enyne **5** (0.200 mmol), aldimine **3** (0.100 mmol), Pd(PPh<sub>3</sub>)<sub>4</sub> (11.6 mg, 0.0100 mmol, 10 mol%), **A1** (12.2 mg, 0.100 mmol, 100 mol%) and 4 Å MS (40 mg). The tube was capped, evacuated and back-filled with argon for five times. Then degassed dry toluene (1.0 mL) was added via syringe. The mixture was stirred at 70 °C for 12 h to 60 h, and monitored by TLC (EtOAc/petroleum ether = 1/5). After completion, the mixture was diluted with EtOAc (15.0 mL), washed with saturated sodium bicarbonate solution (5.0 mL × 3) and brine (5.0 mL), dried over Na<sub>2</sub>SO<sub>4</sub>, filtrated, and concentrated in vacuo. The residue was purified by flash chromatography on silica gel (EtOAc/petroleum ether = 1/5) to give 3-pyrrolylmethylation product **7**.

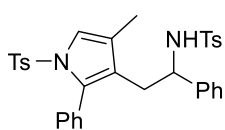

**Synthesis of 7a: General procedure B:** To an oven-dried 10 mL Schlenk tube equipped with a stirring bar were added 4-methyl-*N*-(1-phenylallyl)-*N*-(prop-2-yn-1-yl)benzenesulfonamide **5b** (65.0 mg, 0.200 mmol), *N*-benzylidene-4-

methyl benzenesulfonamide **3a** (25.9 mg, 0.100 mmol), Pd(PPh<sub>3</sub>)<sub>4</sub> (11.6 mg, 0.0100 mmol, 10 mol%), **A1** (12.2 mg, 0.100 mmol, 100 mol%) and 4 Å MS (40 mg). The tube was capped, evacuated and back-filled with argon for five times. Then degassed dry toluene (1.0 mL) was added via syringe. The mixture was stirred at 70 °C for 12 h, and monitored by TLC (EtOAc/petroleum ether = 1/5). After completion, the mixture was diluted with EtOAc (15.0 mL), washed with saturated sodium bicarbonate solution (5.0 mL × 3) and brine (5.0 mL), dried over Na<sub>2</sub>SO<sub>4</sub>, filtrated, and concentrated in vacuo. The residue was purified by flash chromatography on silica gel (EtOAc/petroleum ether = 1/5) to give product **7a**: 52.4 mg (0.0896 mmol), as a light yellow solid, 90% yield; 95:5 rr; mp 77–79 °C; <sup>1</sup>H NMR (400 MHz, CDCl<sub>3</sub>): δ (ppm) 7.38 (d, *J* = 8.2 Hz, 2H), 7.35 (d, *J* = 7.4 Hz, 1H), 7.32–7.26 (m, 1H), 7.25–7.18 (m, 1H), 7.18–7.11 (m, 5H), 7.11–7.04 (m, 5H), 7.02 (d, *J* = 1.2 Hz, 1H), 6.85–6.74 (m, 2H), 6.46 (brs, 1H), 4.58 (s, 1H), 4.09 (dt, *J* = 7.8, 6.8 Hz, 1H), 2.59–2.44 (m, 2H), 2.41 (s, 3H), 2.35 (s, 3H), 1.82 (d, *J* = 1.2 Hz, 3H); <sup>13</sup>C NMR (100 MHz, CDCl<sub>3</sub>): δ (ppm) 144.5, 143.2, 140.8, 136.8, 135.8, 132.6, 131.9, 129.9, 129.39, 129.37, 128.5, 128.3, 127.7, 127.3, 127.1, 126.9, 126.2, 123.2, 121.5, 119.9, 57.7, 33.2, 21.6, 21.5, 10.3; HRMS (ESI-TOF) *m/z*: [M + Na]<sup>+</sup> Calcd for C<sub>33</sub>H<sub>32</sub>N<sub>2</sub>O<sub>4</sub>S<sub>2</sub>Na<sup>+</sup> 607.1696; Found 607.1696.

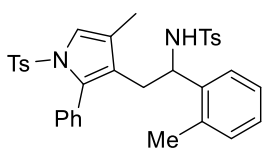

**Synthesis of 7b: General procedure B:** To an oven-dried 10 mL Schlenk tube equipped with a stirring bar were added 4-methyl-*N*-(1-phenylallyl)-*N*-(prop-2-yn-1-yl)benzenesulfonamide **5b** (65.0 mg, 0.200 mmol), 4-methyl-*N*-(2-methylbenzylidene)benzenesulfonamide **3b** (27.3 mg, 0.0999 mmol), Pd(PPh<sub>3</sub>)<sub>4</sub> (11.6 mg, 0.0100

mmol, 10 mol%), **A1** (12.2 mg, 0.100 mmol, 100 mol%) and 4 Å MS (40 mg). The tube was capped, evacuated and back-filled with argon for five times. Then degassed dry toluene (1.0 mL) was added via syringe. The mixture was stirred at 70 °C for 36 h, and monitored by TLC (EtOAc/petroleum ether = 1/5). After completion, the mixture was diluted with EtOAc (15.0 mL), washed with saturated sodium bicarbonate solution (5.0 mL × 3) and brine (5.0 mL), dried over Na<sub>2</sub>SO<sub>4</sub>, filtrated, and concentrated in vacuo. The residue was purified by flash chromatography on silica gel (EtOAc/petroleum ether = 1/5) to give product **7b**: 45.5 mg (0.0759 mmol), as a light yellow solid, 76% yield; >95:5 rr; mp 85–87 °C; <sup>1</sup>H NMR (400 MHz, CDCl<sub>3</sub>): δ (ppm) 7.37 (d, *J* = 8.2 Hz, 2H), 7.35–7.28 (m, 2H), 7.19–7.08 (m, 6H), 7.08–6.94 (m, 4H), 6.93–6.80 (m, 3H), 6.40 (brs, 1H), 4.57 (d, *J* = 5.4 Hz, 1H), 4.33 (dt, *J* = 7.2, 6.0 Hz, 1H), 2.63–2.52 (m, 1H), 2.50–2.42 (m, 1H), 2.40 (s, 3H), 2.36 (s, 3H), 1.86 (s, 3H), 1.76 (s, 3H); <sup>13</sup>C NMR (100 MHz, CDCl<sub>3</sub>): δ (ppm) 144.5, 143.2, 139.2, 136.9, 135.9, 134.7, 132.7, 131.9, 130.2, 129.9, 129.4, 128.5, 127.6, 127.12, 127.09, 126.9, 126.4, 126.0, 123.1, 121.8, 119.9, 53.7, 32.4, 21.6, 21.5, 18.6, 10.4; HRMS (ESI-TOF) *m/z*: [M + Na]<sup>+</sup> Calcd for C<sub>34</sub>H<sub>34</sub>N<sub>2</sub>O<sub>4</sub>S<sub>2</sub>Na<sup>+</sup> 621.1858; Found 621.1863.

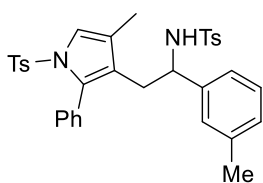

**Synthesis of 7c: General procedure B:** To an oven-dried 10 mL Schlenk tube equipped with a stirring bar were added 4-methyl-*N*-(1-phenylallyl)-*N*-(prop-2-yn-1-yl)benzenesulfonamide **5b** (65.0 mg, 0.200 mmol), 4-methyl-*N*-(3-methylbenzylidene)benzenesulfonamide **3c** (27.3 mg, 0.0999 mmol),

Pd(PPh<sub>3</sub>)<sub>4</sub> (11.6 mg, 0.0100 mmol, 10 mol%), **A1** (12.2 mg, 0.100 mmol, 100 mol%) and 4 Å MS (40 mg). The tube was capped, evacuated and back-filled with argon for five times. Then degassed dry toluene (1.0 mL) was added via syringe. The mixture was stirred at 70 °C for 24 h, and monitored by TLC (EtOAc/petroleum ether = 1/5). After completion, the mixture was diluted with EtOAc (15.0 mL), washed with saturated sodium bicarbonate solution (5.0 mL × 3) and brine (5.0 mL), dried over Na<sub>2</sub>SO<sub>4</sub>, filtrated, and concentrated in vacuo. The residue was purified by flash chromatography on silica gel (EtOAc/petroleum ether = 1/5) to give product **7c**: 52.6 mg (0.0878 mmol), as a white solid, 88% yield; >95:5 rr; mp 135–137 °C; <sup>1</sup>H NMR (400 MHz, CDCl<sub>3</sub>): δ (ppm) 7.44–7.36 (m, 2H), 7.36–7.28 (m, 2H), 7.20–7.11 (m, 5H), 7.11–7.00 (m, 4H), 6.98–6.88 (m, 2H), 6.65–6.53 (m, 2H), 6.48 (brs, 1H), 4.51 (d, *J* = 5.8 Hz, 1H), 4.06 (dt, *J* = 7.0, 6.8 Hz, 1H), 2.60–2.44 (m, 2H), 2.41 (s, 3H), 2.35 (s, 3H), 2.13 (s, 3H), 1.85 (s, 3H); <sup>13</sup>C NMR (100 MHz, CDCl<sub>3</sub>): δ (ppm) 144.5, 143.1, 140.6, 137.9, 136.9, 135.8, 132.5, 131.9, 129.9, 129.4, 129.3, 128.5, 128.14, 128.09, 127.6, 127.1, 126.9,

126.8, 123.5, 123.2, 121.5, 119.9, 57.7, 33.2, 21.6, 21.5, 21.2, 10.4; HRMS (ESI-TOF)  $m/z$ :  $[M + Na]^+$  Calcd for  $C_{34}H_{34}N_2O_4S_2Na^+$  621.1858; Found 621.1864.

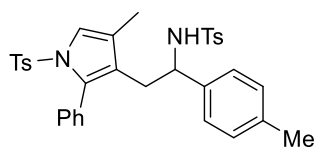

**Synthesis of 7d: General procedure B:** To an oven-dried 10 mL Schlenk tube equipped with a stirring bar were added 4-methyl-*N*-(1-phenylallyl)-*N*-(prop-2-yn-1-yl)benzenesulfonamide **5b** (65.0 mg, 0.200 mmol), 4-methyl-*N*-(4-methylbenzylidene)benzenesulfonamide **3d** (27.3 mg, 0.0999 mmol),  $Pd(PPh_3)_4$  (11.6 mg, 0.0100 mmol, 10 mol%), **A1** (12.2 mg, 0.100 mmol, 100 mol%) and 4 Å MS (40 mg). The tube was capped, evacuated and back-filled with argon for five times. Then degassed dry toluene (1.0 mL) was added via syringe. The mixture was stirred at 70 °C for 36 h, and monitored by TLC (EtOAc/petroleum ether = 1/5). After completion, the mixture was diluted with EtOAc (15.0 mL), washed with saturated sodium bicarbonate solution (5.0 mL  $\times$  3) and brine (5.0 mL), dried over  $Na_2SO_4$ , filtrated, and concentrated in vacuo. The residue was purified by flash chromatography on silica gel (EtOAc/petroleum ether = 1/5) to give product **7d**: 42.5 mg (0.0709 mmol), as a light yellow solid, 71% yield; >95:5 rr; mp 175–176 °C;  $^1H$  NMR (400 MHz,  $CDCl_3$ ):  $\delta$  (ppm) 7.39 (d,  $J$  = 8.0 Hz, 2H), 7.35 (d,  $J$  = 7.2 Hz, 1H), 7.28 (d,  $J$  = 8.2 Hz, 1H), 7.24–7.05 (m, 8H), 7.02 (s, 1H), 6.88 (d,  $J$  = 7.8 Hz, 2H), 6.69 (d,  $J$  = 7.8 Hz, 2H), 6.45 (brs, 1H), 4.45 (d,  $J$  = 5.8 Hz, 1H), 4.04 (dt,  $J$  = 7.0, 6.8 Hz, 1H), 2.60–2.44 (m, 2H), 2.42 (s, 3H), 2.36 (s, 3H), 2.25 (s, 3H), 1.83 (s, 3H);  $^{13}C$  NMR (100 MHz,  $CDCl_3$ ):  $\delta$  (ppm) 144.5, 143.2, 137.8, 137.0, 136.8, 135.9, 132.5, 131.9, 129.9, 129.38, 129.35, 129.0, 128.5, 127.6, 127.1, 126.9, 126.1, 123.3, 121.5, 119.9, 57.5, 33.2, 21.6, 21.5, 21.0, 10.4; HRMS (ESI-TOF)  $m/z$ :  $[M + Na]^+$  Calcd for  $C_{34}H_{34}N_2O_4S_2Na^+$  621.1858; Found 621.1860.

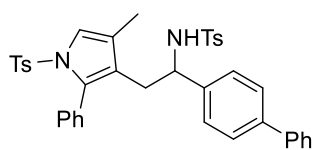

**Synthesis of 7e: General procedure B:** To an oven-dried 10 mL Schlenk tube equipped with a stirring bar were added 4-methyl-*N*-(1-phenylallyl)-*N*-(prop-2-yn-1-yl)benzenesulfonamide **5b** (65.0 mg, 0.200 mmol), *N*-[(1,1'-biphenyl)-4-ylmethylene]-4-methylbenzenesulfonamide **3e** (33.5 mg, 0.0999 mmol),  $Pd(PPh_3)_4$  (11.6 mg, 0.0100 mmol, 10 mol%), **A1** (12.2 mg, 0.100 mmol, 100 mol%) and 4 Å MS (40 mg). The tube was capped, evacuated and back-filled with argon for five times. Then degassed dry toluene (1.0 mL) was added via syringe. The mixture was stirred at 70 °C for 24 h, and monitored by TLC (EtOAc/petroleum ether = 1/5). After completion, the mixture was diluted with EtOAc (15.0 mL), washed with saturated sodium bicarbonate solution (5.0 mL  $\times$  3) and brine (5.0 mL), dried over  $Na_2SO_4$ , filtrated, and concentrated in vacuo. The residue was purified by flash chromatography on



silica gel (EtOAc/petroleum ether = 1/5) to give product **7e**: 42.5 mg (0.0643 mmol), as a light yellow solid, 64% yield; 91:9 rr; mp 91–93 °C; <sup>1</sup>H NMR (400 MHz, CDCl<sub>3</sub>): δ (ppm) 7.55–7.46 (m, 2H), 7.46–7.39 (m, 4H), 7.37–7.31 (m, 3H), 7.29–7.22 (m, 2H), 7.18–7.10 (m, 5H), 7.09–7.01 (m, 4H), 6.84 (d, *J* = 8.0 Hz, 2H), 6.39 (brs, 1H), 4.58 (d, *J* = 6.0 Hz, 1H), 4.15 (dt, *J* = 7.0, 6.8 Hz, 1H), 2.64–2.55 (m, 1H), 2.56–2.48 (m, 1H), 2.39 (s, 3H), 2.30 (s, 3H), 1.88 (s, 3H); <sup>13</sup>C NMR (100 MHz, CDCl<sub>3</sub>): δ (ppm) 144.5, 143.3, 140.7, 140.3, 140.0, 136.9, 135.8, 132.6, 131.8, 129.8, 129.4, 129.3, 128.8, 128.5, 127.6, 127.3, 127.1, 126.99, 126.97, 126.92, 126.7, 123.0, 121.4, 120.0, 57.5, 33.2, 21.54, 21.49, 10.4; HRMS (ESI-TOF) *m/z*: [M + Na]<sup>+</sup> Calcd for C<sub>39</sub>H<sub>36</sub>N<sub>2</sub>O<sub>4</sub>S<sub>2</sub>Na<sup>+</sup> 683.2014; Found 683.2011.

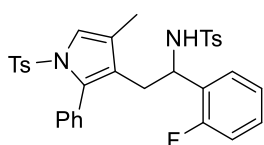

**Synthesis of 7f: General procedure B:** To an oven-dried 10 mL Schlenk tube equipped with a stirring bar were added 4-methyl-*N*-(1-phenylallyl)-*N*-(prop-2-yn-1-yl)benzenesulfonamide **5b** (65.0 mg, 0.200 mmol), *N*-(2-fluoro-

benzylidene)-4-methylbenzenesulfonamide **3m** (27.7 mg, 0.0999 mmol), Pd(PPh<sub>3</sub>)<sub>4</sub> (11.6 mg, 0.0100 mmol, 10 mol%), **A1** (12.2 mg, 0.100 mmol, 100 mol%) and 4 Å MS (40 mg). The tube was capped, evacuated and back-filled with argon for five times. Then degassed dry toluene (1.0 mL) was added via syringe. The mixture was stirred at 70 °C for 12 h, and monitored by TLC (EtOAc/petroleum ether = 1/5). After completion, the mixture was diluted with EtOAc (15.0 mL), washed with saturated sodium bicarbonate solution (5.0 mL × 3) and brine (5.0 mL), dried over Na<sub>2</sub>SO<sub>4</sub>, filtrated, and concentrated in vacuo. The residue was purified by flash chromatography on silica gel (EtOAc/petroleum ether = 1/5) to give product **7f**: 34.0 mg (0.0564 mmol), as a light yellow solid, 56% yield; 81:19 rr; mp 85–87 °C; <sup>1</sup>H NMR (400 MHz, CDCl<sub>3</sub>): δ (ppm) 7.40 (d, *J* = 8.0 Hz, 2H), 7.36 (d, *J* = 7.0 Hz, 1H), 7.20–7.03 (m, 10H), 7.00 (s, 1H), 6.92–6.79 (m, 2H), 6.81–6.69 (m, 1H), 6.47 (brs, 1H), 4.60 (d, *J* = 7.4 Hz, 1H), 4.34 (dt, *J* = 7.6, 7.4 Hz, 1H), 2.62–2.46 (m, 2H), 2.40 (s, 3H), 2.35 (s, 3H), 1.84 (s, 3H); <sup>13</sup>C NMR (100 MHz, CDCl<sub>3</sub>): δ (ppm) 156.0 (d, <sup>1</sup>*J*<sub>FC</sub> = 245.2 Hz), 144.5, 143.2, 136.5, 135.8, 132.6, 131.8, 129.8, 129.4 (d, <sup>3</sup>*J*<sub>FC</sub> = 3.3 Hz), 128.9, 128.9, 128.6, 128.5 (d, <sup>3</sup>*J*<sub>FC</sub> = 4.4 Hz), 127.9, 127.7, 127.1, 126.8, 124.1 (d, <sup>4</sup>*J*<sub>FC</sub> = 3.3 Hz), 122.9, 121.5, 119.9, 115.4 (d, <sup>2</sup>*J*<sub>FC</sub> = 21.7 Hz), 53.3, 31.5, 21.6, 21.5, 10.1; <sup>19</sup>F NMR (375 MHz, CDCl<sub>3</sub>): δ (ppm) –119.3; HRMS (ESI-TOF) *m/z*: [M + Na]<sup>+</sup> Calcd for C<sub>33</sub>H<sub>31</sub>FN<sub>2</sub>O<sub>4</sub>S<sub>2</sub>Na<sup>+</sup> 625.1607; Found 625.1604.

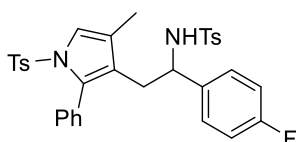

**Synthesis of 7g: General procedure B:** To an oven-dried 10 mL Schlenk tube equipped with a stirring bar were added 4-methyl-*N*-(1-phenylallyl)-*N*-(prop-2-yn-1-yl)benzenesulfonamide **5b** (65.0 mg, 0.200 mmol), *N*-(4-

fluorobenzylidene)-4-methylbenzenesulfonamide **3f** (27.7 mg, 0.0999 mmol), Pd(PPh<sub>3</sub>)<sub>4</sub> (11.6 mg, 0.0100 mmol, 10 mol%), **A1** (12.2 mg, 0.100 mmol, 100 mol%) and 4 Å MS (40 mg). The tube was capped, evacuated and back-filled with argon for five times. Then degassed dry toluene (1.0 mL) was added via syringe. The mixture was stirred at 70 °C for 12 h, and monitored by TLC (EtOAc/petroleum ether = 1/5). After completion, the mixture was diluted with EtOAc (15.0 mL), washed with saturated sodium bicarbonate solution (5.0 mL × 3) and brine (5.0 mL), dried over Na<sub>2</sub>SO<sub>4</sub>, filtrated, and concentrated in vacuo. The residue was purified by flash chromatography on silica gel (EtOAc/petroleum ether = 1/5) to give product **7g**: 45.3 mg (0.0752 mmol), as a light yellow solid, 75% yield; 93:7 rr; mp 151–153 °C; <sup>1</sup>H NMR (400 MHz, CDCl<sub>3</sub>): δ (ppm) 7.44–7.35 (m, 3H), 7.24–7.11 (m, 6H), 7.12–6.97 (m, 4H), 6.80–6.70 (m, 4H), 6.45 (brs, 1H), 4.57–4.44 (m, 1H), 4.08 (dt, *J* = 7.0, 6.8 Hz, 1H), 2.56–2.44 (m, 2H), 2.42 (s, 3H), 2.36 (s, 3H), 1.83 (s, 3H); <sup>13</sup>C NMR (100 MHz, CDCl<sub>3</sub>): δ (ppm) 162.0 (d, <sup>1</sup>*J*<sub>FC</sub> = 246.0 Hz), 144.6, 143.4, 136.8, 136.5 (d, <sup>4</sup>*J*<sub>FC</sub> = 3.2 Hz), 135.8, 132.6, 131.8, 129.8, 129.4 (d, <sup>3</sup>*J*<sub>FC</sub> = 5.1 Hz), 128.6, 128.0, 127.9, 127.7, 127.1, 126.9, 122.8, 121.3, 120.0, 115.1 (d, <sup>2</sup>*J*<sub>FC</sub> = 21.5 Hz), 57.1, 33.2, 21.6, 21.5 10.4; <sup>19</sup>F NMR (375 MHz, CDCl<sub>3</sub>): δ (ppm) –115.1; HRMS (ESI-TOF) *m/z*: [M + Na]<sup>+</sup> Calcd for C<sub>33</sub>H<sub>31</sub>FN<sub>2</sub>O<sub>4</sub>S<sub>2</sub>Na<sup>+</sup> 625.1607; Found 625.1610.

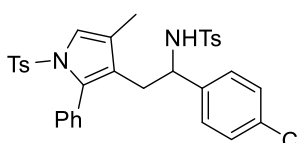

**Synthesis of 7h: General procedure B:** To an oven-dried 10 mL Schlenk tube equipped with a stirring bar were added 4-methyl-*N*-(1-phenylallyl)-*N*-(prop-2-yn-1-yl)benzenesulfonamide **5b** (65.0 mg, 0.200 mmol), *N*-(4-

chlorobenzylidene)-4-methylbenzenesulfonamide **3g** (29.3 mg, 0.0997 mmol), Pd(PPh<sub>3</sub>)<sub>4</sub> (11.6 mg, 0.0100 mmol, 10 mol%), **A1** (12.2 mg, 0.100 mmol, 100 mol%) and 4 Å MS (40 mg). The tube was capped, evacuated and back-filled with argon for five times. Then degassed dry toluene (1.0 mL) was added via syringe. The mixture was stirred at 70 °C for 12 h, and monitored by TLC (EtOAc/petroleum ether = 1/5). After completion, the mixture was diluted with EtOAc (15.0 mL), washed with saturated sodium bicarbonate solution (5.0 mL × 3) and brine (5.0 mL), dried over Na<sub>2</sub>SO<sub>4</sub>, filtrated, and concentrated in vacuo. The residue was purified by flash chromatography on silica gel (EtOAc/petroleum ether = 1/5) to give product **7h**: 50.9 mg (0.0822 mmol), as a white solid, 82% yield; 95:5 rr; mp 109–110 °C; <sup>1</sup>H NMR (400 MHz, CDCl<sub>3</sub>): δ (ppm) 7.42–7.31 (m, 3H), 7.30–

7.20 (m, 2H), 7.20–7.03 (m, 8H), 7.00 (d,  $J = 8.0$  Hz, 2H), 6.70 (d,  $J = 8.2$  Hz, 2H), 6.37 (brs, 1H), 4.56–4.48 (m, 1H), 4.06 (dt,  $J = 7.0, 6.6$  Hz, 1H), 2.57–2.44 (m, 2H), 2.42 (s, 3H), 2.36 (s, 3H), 1.85 (s, 3H);  $^{13}\text{C}$  NMR (100 MHz,  $\text{CDCl}_3$ ):  $\delta$  (ppm) 151.7, 144.6, 143.5, 139.2, 136.7, 135.8, 133.1, 132.6, 131.8, 129.7, 129.5, 129.4, 128.6, 128.4, 127.7, 127.1, 126.9, 122.6, 121.2, 120.0, 57.1, 33.1, 21.6, 21.5, 10.4; HRMS (ESI-TOF)  $m/z$ :  $[\text{M} + \text{Na}]^+$  Calcd for  $\text{C}_{33}\text{H}_{31}^{35}\text{ClN}_2\text{O}_4\text{S}_2\text{Na}^+$  641.1311; Found 641.1307; Calcd for  $\text{C}_{33}\text{H}_{31}^{37}\text{ClN}_2\text{O}_4\text{S}_2\text{Na}^+$  643.1282; Found 643.1289.

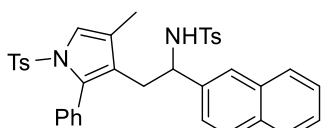

**Synthesis of 7i: General procedure B:** To an oven-dried 10 mL Schlenk

tube equipped with a stirring bar were added 4-methyl-*N*-(1-phenylallyl)-*N*-(prop-2-yn-1-yl)benzenesulfonamide **5b** (65.0 mg, 0.200 mmol), 4-methyl-*N*-(naphthalen-2-ylmethylene)benzenesulfonamide **3h** (30.9 mg, 0.0999 mmol),  $\text{Pd}(\text{PPh}_3)_4$  (11.6 mg, 0.0100 mmol, 10 mol%), **A1** (12.2 mg, 0.100 mmol, 100 mol%) and 4 Å MS (40 mg). The tube was capped, evacuated and back-filled with argon for five times. Then degassed dry toluene (1.0 mL) was added via syringe. The mixture was stirred at 70 °C for 36 h, and monitored by TLC (EtOAc/petroleum ether = 1/5). After completion, the mixture was diluted with EtOAc (15.0 mL), washed with saturated sodium bicarbonate solution (5.0 mL  $\times$  3) and brine (5.0 mL), dried over  $\text{Na}_2\text{SO}_4$ , filtrated, and concentrated in vacuo. The residue was purified by flash chromatography on silica gel (EtOAc/petroleum ether = 1/5) to give product **7i**: 50.9 mg (0.0822 mmol), as a yellow solid, 82% yield; 90:10 rr; mp 142–144 °C;  $^1\text{H}$  NMR (400 MHz,  $\text{CDCl}_3$ ):  $\delta$  (ppm) 7.67–7.56 (m, 1H), 7.46–7.26 (m, 5H), 7.26–7.19 (m, 3H), 7.18–7.09 (m, 4H), 7.12–7.00 (m, 5H), 6.95 (s, 1H), 6.48 (brs, 1H), 5.07–4.55 (m, 2H), 2.86–2.70 (m, 1H), 2.69–2.54 (m, 1H), 2.38 (s, 3H), 2.34 (s, 3H), 1.96 (s, 3H);  $^{13}\text{C}$  NMR (100 MHz,  $\text{CDCl}_3$ ):  $\delta$  (ppm) 144.5, 143.3, 136.4, 135.8, 135.0, 133.6, 132.5, 132.1, 131.8, 130.1, 129.9, 129.4, 129.3, 128.8, 128.6, 127.9, 127.8, 127.1, 126.9, 126.0, 125.3, 125.2, 123.2, 121.9, 121.4, 119.85, 32.23, 32.20, 21.6, 21.5, 10.7; HRMS (ESI-TOF)  $m/z$ :  $[\text{M} + \text{Na}]^+$  Calcd for  $\text{C}_{37}\text{H}_{34}\text{N}_2\text{O}_4\text{S}_2\text{Na}^+$  657.1852; Found 657.1845.

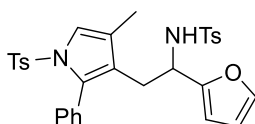

**Synthesis of 7j: General procedure B:** To an oven-dried 10 mL Schlenk

tube equipped with a stirring bar were added 4-methyl-*N*-(1-phenylallyl)-*N*-(prop-2-yn-1-yl)benzenesulfonamide **5b** (65.0 mg, 0.200 mmol), *N*-(furan-2-ylmethylene)-4-methylbenzenesulfonamide **3i** (24.9 mg, 0.0999 mmol),  $\text{Pd}(\text{PPh}_3)_4$  (11.6 mg, 0.0100 mmol, 10 mol%), **A1** (12.2 mg, 0.100 mmol, 100 mol%) and 4 Å MS (40 mg). The tube was capped, evacuated and back-filled with argon for five times. Then degassed dry toluene (1.0 mL) was added

via syringe. The mixture was stirred at 70 °C for 36 h, and monitored by TLC (EtOAc/petroleum ether = 1/5). After completion, the mixture was diluted with EtOAc (15.0 mL), washed with saturated sodium bicarbonate solution (5.0 mL × 3) and brine (5.0 mL), dried over Na<sub>2</sub>SO<sub>4</sub>, filtrated, and concentrated in vacuo. The residue was purified by flash chromatography on silica gel (EtOAc/petroleum ether = 1/5) to give product **7j**: 42.7 mg (0.0742 mmol), as a yellow solid, 74% yield; >95:5 rr; mp 67–68 °C; <sup>1</sup>H NMR (400 MHz, CDCl<sub>3</sub>): δ (ppm) 7.42 (d, *J* = 8.0 Hz, 2H), 7.39–7.32 (m, 1H), 7.31–7.25 (m, 2H), 7.22–7.12 (m, 5H), 7.12–7.04 (m, 3H), 7.03 (s, 1H), 6.72 (brs, 1H), 6.08 (dd, *J* = 3.2, 1.8 Hz, 1H), 5.74 (d, *J* = 3.2 Hz, 1H), 4.50 (d, *J* = 7.8 Hz, 1H), 4.26 (dt, *J* = 7.8, 7.6 Hz, 1H), 2.71–2.52 (m, 2H), 2.41 (s, 3H), 2.36 (s, 3H), 1.88 (s, 3H); <sup>13</sup>C NMR (100 MHz, CDCl<sub>3</sub>): δ (ppm) 152.4, 144.4, 143.2, 141.8, 137.1, 135.9, 132.7, 131.9, 130.0, 129.4, 129.3, 128.5, 127.6, 127.1, 126.7, 122.8, 121.6, 119.8, 110.1, 107.0, 51.4, 30.2, 21.6, 21.5, 10.3; HRMS (ESI-TOF) *m/z*: [M + Na]<sup>+</sup> Calcd for C<sub>31</sub>H<sub>30</sub>N<sub>2</sub>O<sub>5</sub>S<sub>2</sub>Na<sup>+</sup> 597.1494; Found 597.1490.

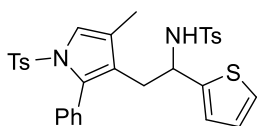

**Synthesis of 7k: General procedure B:** To an oven-dried 10 mL Schlenk tube

equipped with a stirring bar were added 4-methyl-*N*-(1-phenylallyl)-*N*-(prop-2-yn-1-yl)benzenesulfonamide **5b** (65.0 mg, 0.200 mmol), 4-methyl-*N*-(thiophen-2-yl methylene)benzenesulfonamide **3j** (26.5 mg, 0.0999 mmol), Pd(PPh<sub>3</sub>)<sub>4</sub> (11.6 mg, 0.0100 mmol, 10 mol%), **A1** (12.2 mg, 0.100 mmol, 100 mol%) and 4 Å MS (40 mg). The tube was capped, evacuated and back-filled with argon for five times. Then degassed dry toluene (1.0 mL) was added via syringe. The mixture was stirred at 70 °C for 36 h, and monitored by TLC (EtOAc/petroleum ether = 1/5). After completion, the mixture was diluted with EtOAc (15.0 mL), washed with saturated sodium bicarbonate solution (5.0 mL × 3) and brine (5.0 mL), dried over Na<sub>2</sub>SO<sub>4</sub>, filtrated, and concentrated in vacuo. The residue was purified by flash chromatography on silica gel (EtOAc/petroleum ether = 1/5) to give product **7k**: 30.0 mg (0.0508 mmol), as a yellow solid, 51% yield; >95:5 rr; mp 75–77 °C; <sup>1</sup>H NMR (400 MHz, CDCl<sub>3</sub>): δ (ppm) 7.44 (d, *J* = 8.0 Hz, 2H), 7.39–7.25 (m, 3H), 7.25–7.17 (m, 3H), 7.14 (d, *J* = 8.2 Hz, 2H), 7.09 (d, *J* = 8.2 Hz, 2H), 7.05–6.99 (m, 2H), 6.77–6.71 (m, 1H), 6.63 (brs, 1H), 6.54 (d, *J* = 3.6 Hz, 1H), 4.51–4.36 (m, 2H), 2.63 (d, *J* = 6.8 Hz, 2H), 2.44 (s, 3H), 2.36 (s, 3H), 1.88 (d, *J* = 1.2 Hz, 3H); <sup>13</sup>C NMR (100 MHz, CDCl<sub>3</sub>): δ (ppm) 144.8, 144.5, 143.4, 137.0, 135.9, 132.7, 131.9, 129.9, 129.5, 129.4, 128.6, 127.7, 127.1, 126.8, 126.6, 124.5, 124.4, 122.9, 121.4, 119.9, 53.4, 33.5, 21.6, 21.5, 10.4; HRMS (ESI-TOF) *m/z*: [M + Na]<sup>+</sup> Calcd for C<sub>31</sub>H<sub>30</sub>N<sub>2</sub>O<sub>4</sub>S<sub>3</sub>Na<sup>+</sup> 613.1265; Found 613.1266.

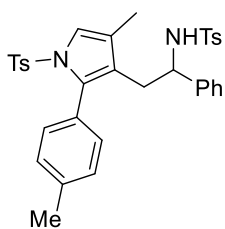

**Synthesis of 7l: General procedure B:** To an oven-dried 10 mL Schlenk tube equipped with a stirring bar were added 4-methyl-*N*-(prop-2-yn-1-yl)-*N*-(1-(*p*-tolyl)allyl)benzenesulfonamide **5d** (67.8 mg, 0.200 mmol), *N*-benzylidene-4-methylbenzenesulfonamide **3a** (25.9 mg, 0.100 mmol), Pd(PPh<sub>3</sub>)<sub>4</sub> (11.6 mg,

0.0100 mmol, 10 mol%), **A1** (12.2 mg, 0.100 mmol, 100 mol%) and 4 Å MS (40 mg). The tube was capped, evacuated and back-filled with argon for five times. Then degassed dry toluene (1.0 mL) was added via syringe. The mixture was stirred at 70 °C for 12 h, and monitored by TLC (EtOAc/petroleum ether = 1/5). After completion, the mixture was diluted with EtOAc (15.0 mL), washed with saturated sodium bicarbonate solution (5.0 mL × 3) and brine (5.0 mL), dried over Na<sub>2</sub>SO<sub>4</sub>, filtrated, and concentrated in vacuo. The residue was purified by flash chromatography on silica gel (EtOAc/petroleum ether = 1/5) to give product **7l**: 48.0 mg (0.0805 mmol), as a light yellow solid, 81% yield; 93:7 rr; mp 137–139 °C; <sup>1</sup>H NMR (400 MHz, CDCl<sub>3</sub>): δ (ppm) 7.38 (d, *J* = 8.0 Hz, 2H), 7.23–7.13 (m, 5H), 7.13–7.05 (m, 6H), 7.02–6.96 (m, 2H), 6.86 (d, *J* = 6.6 Hz, 2H), 6.38 (brs, 1H), 4.47 (d, *J* = 5.6 Hz, 1H), 4.10 (dt, *J* = 8.0, 6.4 Hz, 1H), 2.56–2.44 (m, 2H), 2.42 (s, 3H), 2.41 (s, 3H), 2.36 (s, 3H), 1.79 (s, 3H); <sup>13</sup>C NMR (100 MHz, CDCl<sub>3</sub>): δ (ppm) 144.5, 143.2, 141.0, 138.5, 136.8, 135.9, 132.7, 131.7, 129.42, 129.37, 129.35, 128.5, 128.3, 127.3, 127.1, 126.8, 126.2, 123.0, 121.5, 119.8, 57.7, 33.2, 21.6, 21.5, 21.4, 10.3; HRMS (ESI-TOF) *m/z*: [M + Na]<sup>+</sup> Calcd for C<sub>34</sub>H<sub>34</sub>N<sub>2</sub>O<sub>4</sub>S<sub>2</sub>Na<sup>+</sup> 621.1858; Found 621.1857.

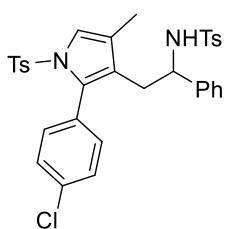

**Synthesis of 7m: General procedure B:** To an oven-dried 10 mL Schlenk tube equipped with a stirring bar were added *N*-(1-(4-chlorophenyl)allyl)-4-methyl-*N*-(prop-2-yn-1-yl)benzenesulfonamide **5e** (71.8 mg, 0.200 mmol), *N*-benzylidene-4-methylbenzenesulfonamide **3a** (25.9 mg, 0.100 mmol), Pd(PPh<sub>3</sub>)<sub>4</sub> (11.6 mg,

0.0100 mmol, 10 mol%), **A1** (12.2 mg, 0.100 mmol, 100 mol%) and 4 Å MS (40 mg). The tube was capped, evacuated and back-filled with argon for five times. Then degassed dry toluene (1.0 mL) was added via syringe. The mixture was stirred at 70 °C for 12 h, and monitored by TLC (EtOAc/petroleum ether = 1/5). After completion, the mixture was diluted with EtOAc (15.0 mL), washed with saturated sodium bicarbonate solution (5.0 mL × 3) and brine (5.0 mL), dried over Na<sub>2</sub>SO<sub>4</sub>, filtrated, and concentrated in vacuo. The residue was purified by flash chromatography on silica gel (EtOAc/petroleum ether = 1/5) to give product **7m**: 47.1 mg (0.0762 mmol), as a light yellow solid, 76% yield; 92:8 rr; mp 131–133 °C; <sup>1</sup>H NMR (400 MHz, CDCl<sub>3</sub>): δ (ppm) 7.39 (d, *J* =

8.0 Hz, 2H), 7.23–7.08 (m, 10H), 7.06–7.01 (m, 3H), 6.73 (d,  $J = 7.2$  Hz, 2H), 6.28 (brs, 1H), 4.64 (d,  $J = 6.2$  Hz, 1H), 4.09 (dt,  $J = 7.2, 7.0$  Hz, 1H), 2.68–2.40 (m, 2H), 2.40 (s, 3H), 2.37 (s, 3H), 1.85 (s, 3H);  $^{13}\text{C}$  NMR (100 MHz,  $\text{CDCl}_3$ ):  $\delta$  (ppm) 144.7, 143.3, 140.2, 136.9, 135.7, 134.6, 133.1, 132.9, 131.3, 129.5, 129.4, 128.4, 128.3, 127.8, 127.4, 127.0, 126.9, 126.3, 123.6, 121.9, 120.3, 57.7, 33.2, 21.6, 21.5, 10.4; HRMS (ESI-TOF)  $m/z$ :  $[\text{M} + \text{Na}]^+$  Calcd for  $\text{C}_{33}\text{H}_{31}^{35}\text{ClN}_2\text{O}_4\text{S}_2\text{Na}^+$  641.1311; Found 641.1303; Calcd for  $\text{C}_{33}\text{H}_{31}^{37}\text{ClN}_2\text{O}_4\text{S}_2\text{Na}^+$  643.1282; Found 643.1288.

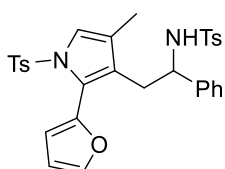

**Synthesis of 7n: General procedure B:** To an oven-dried 10 mL Schlenk tube equipped with a stirring bar were added *N*-(1-(furan-2-yl)allyl)-4-methyl-*N*-(prop-2-yn-1-yl)benzenesulfonamide **5f** (63.0 mg, 0.200 mmol), *N*-benzylidene-4-methyl benzenesulfonamide **3a** (25.9 mg, 0.100 mmol),  $\text{Pd}(\text{PPh}_3)_4$  (11.6 mg,

0.0100 mmol, 10 mol%), **A1** (12.2 mg, 0.100 mmol, 100 mol%) and 4 Å MS (40 mg). The tube was capped, evacuated and back-filled with argon for five times. Then degassed dry toluene (1.0 mL) was added via syringe. The mixture was stirred at 70 °C for 36 h, and monitored by TLC (EtOAc/petroleum ether = 1/5). After completion, the mixture was diluted with EtOAc (15.0 mL), washed with saturated sodium bicarbonate solution (5.0 mL  $\times$  3) and brine, dried over  $\text{Na}_2\text{SO}_4$ , filtrated, and concentrated in vacuo. The residue was purified by flash chromatography on silica gel (EtOAc/petroleum ether = 1/5) to give product **7n**: 51.5 mg (0.0896 mmol), as a yellow solid, 90% yield; >95:5 rr; mp 79–81 °C;  $^1\text{H}$  NMR (400 MHz,  $\text{CDCl}_3$ ):  $\delta$  (ppm) 7.53–7.50 (m, 1H), 7.43–7.38 (m, 4H), 7.21 (d,  $J = 8.2$  Hz, 2H), 7.17–7.13 (m, 4H), 7.12 (s, 1H), 7.04–6.97 (m, 2H), 6.96 (d,  $J = 1.2$  Hz, 1H), 6.48 (dd,  $J = 3.2, 2.0$  Hz, 1H), 6.23 (d,  $J = 3.2$  Hz, 1H), 4.96–4.89 (m, 1H), 4.20–4.06 (m, 1H), 2.61–2.44 (m, 2H), 2.41 (s, 3H), 2.39 (s, 3H), 1.67 (d,  $J = 1.2$  Hz, 3H);  $^{13}\text{C}$  NMR (100 MHz,  $\text{CDCl}_3$ ):  $\delta$  (ppm) 144.7, 143.2, 141.2, 136.7, 135.7, 132.1, 129.52, 129.46, 129.4, 128.5, 128.4, 127.4, 127.2, 126.9, 126.8, 126.2, 126.0, 123.6, 120.9, 57.6, 33.4, 21.6, 21.5, 10.2; HRMS (ESI-TOF)  $m/z$ :  $[\text{M} + \text{Na}]^+$  Calcd for  $\text{C}_{31}\text{H}_{30}\text{N}_2\text{O}_5\text{S}_2\text{Na}^+$  597.1488; Found 597.1485.

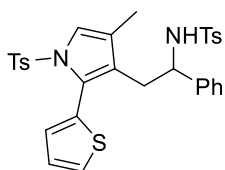

**Synthesis of 7o: General procedure B:** To an oven-dried 10 mL Schlenk tube equipped with a stirring bar were added 4-methyl-*N*-(prop-2-yn-1-yl)-*N*-(1-(thiophen-2-yl)allyl)benzenesulfonamide **5g** (66.2 mg, 0.200 mmol), *N*-benzylidene-4-methylbenzenesulfonamide **3a** (25.9 mg, 0.100 mmol),  $\text{Pd}(\text{PPh}_3)_4$

(11.6 mg, 0.0100 mmol, 10 mol%), **A1** (12.2 mg, 0.100 mmol, 100 mol%) and 4 Å MS (40 mg). The tube was capped, evacuated and back-filled with argon for five times. Then degassed dry toluene (1.0

mL) was added via syringe. The mixture was stirred at 70 °C for 36 h, and monitored by TLC (EtOAc/petroleum ether = 1/5). After completion, the mixture was diluted with EtOAc (15.0 mL), washed with saturated sodium bicarbonate solution (5.0 mL × 3) and brine (5.0 mL), dried over Na<sub>2</sub>SO<sub>4</sub>, filtrated, and concentrated in vacuo. The residue was purified by flash chromatography on silica gel (EtOAc/petroleum ether = 1/5) to give product **7o**: 47.2 mg (0.0798 mmol), as a yellow solid, 80% yield; >95:5 rr; mp 76–78 °C; <sup>1</sup>H NMR (400 MHz, CDCl<sub>3</sub>): δ (ppm) 7.43 (d, *J* = 8.2, 1H), 7.39 (dd, *J* = 5.2, 1.2 Hz, 1H), 7.26–7.22 (m, 2H), 7.18 (d, *J* = 8.0 Hz, 2H), 7.16–7.09 (m, 5H), 7.06–7.00 (m, 2H), 6.99–6.92 (m, 2H), 6.67 (d, *J* = 3.6 Hz, 1H), 4.67–4.56 (m, 1H), 4.16 (dt, *J* = 7.4, 6.8 Hz, 1H), 2.60–2.52 (m, 2H), 2.43 (s, 3H), 2.37 (s, 3H), 1.79 (d, *J* = 1.2 Hz, 3H); <sup>13</sup>C NMR (100 MHz, CDCl<sub>3</sub>): δ (ppm) 144.9, 143.5, 143.1, 142.3, 141.2, 136.7, 135.9, 129.6, 129.3, 128.3, 127.4, 127.13, 127.08, 126.9, 126.2, 121.9, 121.5, 121.3, 114.2, 111.1, 57.3, 33.5, 21.6, 21.5, 10.0; HRMS (ESI-TOF) *m/z*: [M + Na]<sup>+</sup> Calcd for C<sub>31</sub>H<sub>30</sub>N<sub>2</sub>O<sub>4</sub>S<sub>3</sub>Na<sup>+</sup> 613.1260; Found 613.1263.

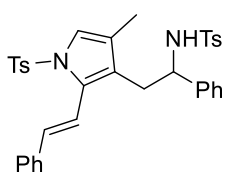

**Synthesis of 7p: General procedure B:** To an oven-dried 10 mL Schlenk tube equipped with a stirring bar were added (*E*)-4-methyl-*N*-(1-phenylpenta-1,4-dien-3-yl)-*N*-(prop-2-yn-1-yl)benzenesulfonamide **5h** (70.2 mg, 0.200 mmol), *N*-benzylidene-4-methylbenzenesulfonamide **3a** (25.9 mg, 0.100 mmol), Pd(PPh<sub>3</sub>)<sub>4</sub>

(11.6 mg, 0.0100 mmol, 10 mol%), **A1** (12.2 mg, 0.100 mmol, 100 mol%) and 4 Å MS (40 mg). The tube was capped, evacuated and back-filled with argon for five times. Then degassed dry toluene (1.0 mL) was added via syringe. The mixture was stirred at 70 °C for 48 h, and monitored by TLC (EtOAc/petroleum ether = 1/5). After completion, the mixture was diluted with EtOAc (15.0 mL), washed with saturated sodium bicarbonate solution (5.0 mL × 3) and brine (5.0 mL), dried over Na<sub>2</sub>SO<sub>4</sub>, filtrated, and concentrated in vacuo. The residue was purified by flash chromatography on silica gel (EtOAc/petroleum ether = 1/5) to give product **7p**: 22.0 mg (0.0360 mmol), as a yellow solid, 36% yield; >95:5 rr; mp 93–95 °C; <sup>1</sup>H NMR (400 MHz, CDCl<sub>3</sub>): δ (ppm) 7.59–7.52 (m, 2H), 7.46–7.35 (m, 6H), 7.36–7.27 (m, 2H), 7.23–7.11 (m, 4H), 7.15–7.05 (m, 3H), 7.03 (d, *J* = 16.6 Hz, 1H), 6.96–6.86 (m, 2H), 6.35 (d, *J* = 16.6 Hz, 1H), 4.67 (d, *J* = 5.8 Hz, 1H), 4.29 (dt, *J* = 7.4, 6.0 Hz, 1H), 3.03–2.87 (m, 1H), 2.83–2.71 (m, 1H), 2.39 (s, 3H), 2.36 (s, 3H), 1.71 (d, *J* = 1.2 Hz, 3H); <sup>13</sup>C NMR (100 MHz, CDCl<sub>3</sub>): δ (ppm) 144.8, 143.3, 140.6, 136.9, 136.6, 135.9, 132.7, 130.7, 129.7, 129.5, 128.8, 128.4, 128.1, 127.5, 127.0, 126.9, 126.5, 126.3, 123.2, 122.8, 120.1, 117.4, 57.5, 33.9, 21.6, 21.5, 10.3; HRMS (ESI-TOF) *m/z*: [M + Na]<sup>+</sup> Calcd for C<sub>35</sub>H<sub>34</sub>N<sub>2</sub>O<sub>4</sub>S<sub>2</sub>Na<sup>+</sup> 631.1852; Found

631.1844.

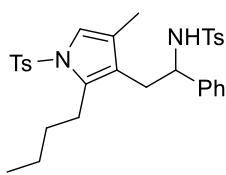

**Synthesis of 7q: General procedure B:** To an oven-dried 10 mL Schlenk tube

equipped with a stirring bar were added *N*-(hept-1-en-3-yl)-4-methyl-*N*-(prop-2-yn-1-yl)benzenesulfonamide **5i** (61.0 mg, 0.200 mmol), *N*-benzylidene-4-methylbenzenesulfonamide **3a** (25.9 mg, 0.100 mmol), Pd(PPh<sub>3</sub>)<sub>4</sub> (11.6 mg,

0.0100 mmol, 10 mol%), **A1** (12.2 mg, 0.100 mmol, 100 mol%) and 4 Å MS (40 mg). The tube was capped, evacuated and back-filled with argon for five times. Then degassed dry toluene (1.0 mL) was added via syringe. The mixture was stirred at 70 °C for 48 h, and monitored by TLC (EtOAc/petroleum ether = 1/5). After completion, the mixture was diluted with EtOAc (15.0 mL), washed with saturated sodium bicarbonate solution (5.0 mL × 3) and brine (5.0 mL), dried over Na<sub>2</sub>SO<sub>4</sub>, filtrated, and concentrated in vacuo. The residue was purified by flash chromatography on silica gel (EtOAc/petroleum ether = 1/5) to give product **7q**: 49.0 mg (0.0867 mmol), as a yellow solid, 87% yield; >95:5 rr; mp 71–73 °C; <sup>1</sup>H NMR (400 MHz, CDCl<sub>3</sub>): δ (ppm) 7.54 (d, *J* = 8.4 Hz, 2H), 7.43 (d, *J* = 8.2 Hz, 2H), 7.29 (d, *J* = 8.2 Hz, 2H), 7.16–7.08 (m, 3H), 7.07–6.99 (m, 2H), 6.87 (d, *J* = 1.4 Hz, 1H), 6.85–6.80 (m, 2H), 4.81 (d, *J* = 5.8 Hz, 1H), 4.18 (dt, *J* = 7.2, 6.8 Hz, 1H), 2.70 (dd, *J* = 14.2, 6.8 Hz, 1H), 2.57 (dd, *J* = 14.1, 8.0 Hz, 1H), 2.42 (s, 3H), 2.37 (s, 3H), 2.31–2.24 (m, 2H), 1.59 (d, *J* = 1.2 Hz, 3H), 1.32–1.10 (m, 4H), 0.81 (t, *J* = 7.0 Hz, 3H); <sup>13</sup>C NMR (100 MHz, CDCl<sub>3</sub>): δ (ppm) 144.5, 143.3, 140.3, 136.9, 136.8, 133.9, 129.9, 129.4, 128.2, 127.0, 126.44, 126.36, 122.4, 121.1, 119.5, 58.0, 33.7, 32.9, 25.1, 22.6, 21.6, 21.5, 13.7, 10.2; HRMS (ESI-TOF) *m/z*: [M + Na]<sup>+</sup> Calcd for C<sub>31</sub>H<sub>36</sub>N<sub>2</sub>O<sub>4</sub>S<sub>2</sub>Na<sup>+</sup> 587.2009; Found 587.2001.

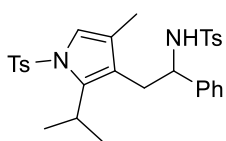

**Synthesis of 7r: General procedure B:** To an oven-dried 10 mL Schlenk tube

equipped with a stirring bar were added 4-methyl-*N*-(4-methylpent-1-en-3-yl)-*N*-(prop-2-yn-1-yl)benzenesulfonamide **5j** (58.2 mg, 0.200 mmol), *N*-benzylidene-

4-methylbenzenesulfonamide **3a** (25.9 mg, 0.100 mmol), Pd(PPh<sub>3</sub>)<sub>4</sub> (11.6 mg, 0.0100 mmol, 10 mol%), **A1** (12.2 mg, 0.100 mmol, 100 mol%) and 4 Å MS (40 mg). The tube was capped, evacuated and back-filled with argon for five times. Then degassed dry toluene (1.0 mL) was added via syringe. The mixture was stirred at 70 °C for 48 h, and monitored by TLC (EtOAc/petroleum ether = 1/5). After completion, the mixture was diluted with EtOAc (15.0 mL), washed with saturated sodium bicarbonate solution (5.0 mL × 3) and brine (5.0 mL), dried over Na<sub>2</sub>SO<sub>4</sub>, filtrated, and concentrated in vacuo. The residue was purified by flash chromatography on silica gel (EtOAc/petroleum ether =



1/5) to give product **7r**: 25.8 mg (0.0469 mmol), as a light yellow solid, 47% yield; >95:5 rr; mp 82–84 °C; <sup>1</sup>H NMR (400 MHz, CDCl<sub>3</sub>): δ (ppm) 7.54 (d, *J* = 8.2 Hz, 2H), 7.41 (d, *J* = 8.2 Hz, 2H), 7.30 (d, *J* = 8.2 Hz, 2H), 7.21–7.08 (m, 5H), 7.07–7.00 (m, 2H), 6.96 (s, 1H), 4.81 (d, *J* = 5.2 Hz, 1H), 4.32 (dt, *J* = 7.0, 6.6 Hz, 1H), 2.82 (dd, *J* = 14.6, 8.6 Hz, 1H), 2.65 (dd, *J* = 14.6, 7.0 Hz, 1H), 2.41 (s, 3H), 2.38 (s, 3H), 1.63 (d, *J* = 1.2 Hz, 3H), 1.07 (d, *J* = 7.2 Hz, 3H), 0.85 (d, *J* = 7.2 Hz, 3H); <sup>13</sup>C NMR (100 MHz, CDCl<sub>3</sub>): δ (ppm) 144.6, 143.2, 140.8, 137.9, 137.1, 136.8, 129.9, 129.3, 128.3, 127.5, 127.1, 126.5, 126.4, 121.8, 120.5, 119.8, 57.8, 34.3, 22.4, 22.0, 21.6, 21.4, 10.5; HRMS (ESI-TOF) *m/z*: [M + Na]<sup>+</sup> Calcd for C<sub>30</sub>H<sub>34</sub>N<sub>2</sub>O<sub>4</sub>S<sub>2</sub>Na<sup>+</sup> 573.1858; Found 573.1855.

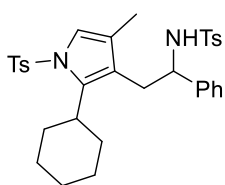

**Synthesis of 7s: General procedure B:** To an oven-dried 10 mL Schlenk tube equipped with a stirring bar were added *N*-(1-cyclohexylallyl)-4-methyl-*N*-(prop-2-yn-1-yl)benzenesulfonamide **5k** (58.2 mg, 0.200 mmol), *N*-benzylidene-4-methylbenzene sulfonamide **3a** (25.9 mg, 0.100 mmol), Pd(PPh<sub>3</sub>)<sub>4</sub> (11.6 mg,

0.0100 mmol, 10 mol%), **A1** (12.2 mg, 0.100 mmol, 100 mol%) and 4 Å MS (40 mg). The tube was capped, evacuated and back-filled with argon for five times. Then degassed dry toluene (1.0 mL) was added via syringe. The mixture was stirred at 70 °C for 48 h, and monitored by TLC (EtOAc/petroleum ether = 1/5). After completion, the mixture was diluted with EtOAc (15.0 mL), washed with saturated sodium bicarbonate solution (5.0 mL × 3) and brine (5.0 mL), dried over Na<sub>2</sub>SO<sub>4</sub>, filtrated, and concentrated in vacuo. The residue was purified by flash chromatography on silica gel (EtOAc/petroleum ether = 1/5) to give product **7s**: 46.9 mg (0.0794 mmol), as a yellow solid, 79% yield; >95:5 rr; mp 81–83 °C; <sup>1</sup>H NMR (400 MHz, CDCl<sub>3</sub>): δ (ppm) 7.58 (d, *J* = 8.0 Hz, 2H), 7.41 (d, *J* = 8.0 Hz, 2H), 7.30 (d, *J* = 8.0 Hz, 2H), 7.22–7.16 (m, 3H), 7.13 (d, *J* = 8.0 Hz, 2H), 7.10–7.04 (m, 2H), 6.94 (s, 1H), 4.85 (d, *J* = 5.0 Hz, 1H), 4.30 (dt, *J* = 7.2, 6.4 Hz, 2H), 3.17–2.93 (m, 1H), 2.82 (dd, *J* = 14.6, 9.0 Hz, 1H), 2.64 (dd, *J* = 14.6, 6.8 Hz, 1H), 2.42 (s, 3H), 2.38 (s, 3H), 1.82–1.66 (m, 2H), 1.61 (s, 3H), 1.54–1.36 (m, 2H), 1.22–0.91 (m, 6H); <sup>13</sup>C NMR (100 MHz, CDCl<sub>3</sub>): δ (ppm) 144.7, 143.2, 141.1, 137.2, 137.0, 136.8, 129.9, 129.3, 128.4, 127.5, 127.1, 126.6, 126.5, 121.7, 120.4, 119.4, 57.9, 36.5, 34.5, 33.0, 32.4, 27.3, 27.1, 25.8, 21.6, 21.5, 10.5; HRMS (ESI-TOF) *m/z*: [M + Na]<sup>+</sup> Calcd for C<sub>33</sub>H<sub>38</sub>N<sub>2</sub>O<sub>4</sub>S<sub>2</sub>Na<sup>+</sup> 613.2171; Found 613.2166.

## 6. General procedure for synthesis of 4-pyrrolylmethylation products **8**

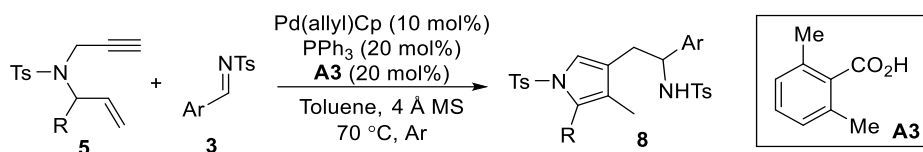

**General procedure C:** To an oven-dried 10 mL Schlenk tube equipped with a stirring bar were added 1,6-enyne **5** (0.200 mmol), aldimine **3** (0.100 mmol), Pd(allyl)Cp (2.1 mg, 0.0099 mmol, 10 mol%), PPh<sub>3</sub> (5.2 mg, 0.020 mmol, 20mol%), **A3** (3.0 mg, 0.020 mmol, 20 mol%) and 4 Å MS (40 mg). The tube was capped, evacuated and back-filled with argon for five times. Then degassed dry toluene (1.0 mL) was added via syringe. The mixture was stirred at 70 °C for 12 h to 96 h, and monitored by TLC (EtOAc/petroleum ether = 1/5). After completion, the mixture was directly purified by flash chromatography on silica gel (EtOAc/petroleum ether = 1/6 to 1/5) to give 4-pyrrolylmethylation product **8**.

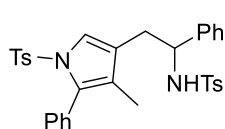

**Synthesis of 8a: General procedure C:** To an oven-dried 10 mL Schlenk tube equipped with a stirring bar were added 4-methyl-*N*-(1-phenylallyl)-*N*-(prop-2-yn-1-yl)benzenesulfonamide **5b** (65.0 mg, 0.200 mmol), *N*-benzylidene-4-methylbenzenesulfonamide **3a** (25.9 mg, 0.100 mmol), Pd(allyl)Cp (2.1 mg, 0.0099 mmol), PPh<sub>3</sub> (5.2 mg, 0.020 mmol, 20 mol%), **A3** (3.0 mg, 0.020 mmol, 20 mol%) and 4 Å MS (40 mg). The tube was capped, evacuated and back-filled with argon for five times. Then degassed dry toluene (1.0 mL) was added via syringe. The mixture was stirred at 70 °C for 36 h, and monitored by TLC (EtOAc/petroleum ether = 1/5). After completion, the mixture was directly purified by flash chromatography on silica gel (EtOAc/petroleum ether = 1/6 to 1/5) to give product **8a**: 43.6 mg (0.0746 mmol), as a white solid, 75% yield; 7:93 rr; mp 90–92 °C; <sup>1</sup>H NMR (400 MHz, CDCl<sub>3</sub>): δ (ppm) 7.50 (d, *J* = 8.2 Hz, 2H), 7.39–7.27 (m, 3H), 7.22–7.17 (m, 3H), 7.17–7.10 (m, 6H), 7.04–6.94 (m, 5H), 4.77 (d, *J* = 5.8 Hz, 1H), 4.40 (dt, *J* = 6.8, 6.2 Hz, 1H), 2.80 (d, *J* = 7.0 Hz, 2H), 2.39–2.35 (m, 6H), 1.43 (s, 3H); <sup>13</sup>C NMR (100 MHz, CDCl<sub>3</sub>): δ (ppm) 144.5, 143.3, 140.3, 137.1, 135.7, 132.02, 131.98, 131.7, 130.5, 129.5, 128.4, 128.2, 127.7, 127.3, 127.12, 127.09, 126.6, 123.7, 122.1, 121.2, 57.4, 34.0, 21.6, 21.5, 9.5; HRMS (ESI-TOF) *m/z*: [M + Na]<sup>+</sup> Calcd for C<sub>33</sub>H<sub>32</sub>N<sub>2</sub>O<sub>4</sub>S<sub>2</sub>Na<sup>+</sup> 607.1696; Found 607.1691.

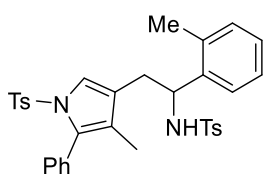

**Synthesis of 8b: General procedure C:** To an oven-dried 10 mL Schlenk tube equipped with a stirring bar were added 4-methyl-*N*-(1-phenylallyl)-*N*-(prop-2-yn-1-yl)benzenesulfonamide **5b** (65.0 mg, 0.200 mmol), 4-methyl-*N*-(2-methylbenzylidene)benzenesulfonamide **3b** (27.3 mg, 0.0999 mmol),

Pd(allyl)Cp (2.1 mg, 0.0099 mmol, 10 mol%), PPh<sub>3</sub> (5.2 mg, 0.020 mmol, 20 mol%), **A3** (3.0 mg, 0.020 mmol, 20 mol%) and 4 Å MS (40 mg). The tube was capped, evacuated and back-filled with argon for five times. Then degassed dry toluene (1.0 mL) was added via syringe. The mixture was stirred at 70 °C for 36 h, and monitored by TLC (EtOAc/petroleum ether = 1/5). After completion, the mixture was directly purified by flash chromatography on silica gel (EtOAc/petroleum ether = 1/6 to 1/5) to give product **8b**: 44.5 mg (0.0743 mmol), as a yellow solid, 74% yield; 7:93 rr; mp 81–83 °C; <sup>1</sup>H NMR (400 MHz, CDCl<sub>3</sub>): δ (ppm) 7.48 (d, *J* = 8.3 Hz, 2H), 7.37–7.28 (m, 3H), 7.17–7.10 (m, 6H), 7.09–7.04 (m, 1H), 7.04–6.98 (m, 4H), 6.97–6.91 (m, 2H), 4.81 (d, *J* = 5.6 Hz, 1H), 4.66 (dt, *J* = 6.8, 6.2 Hz, 1H), 2.88–2.68 (m, 2H), 2.37 (s, 3H), 2.35 (s, 3H), 2.04 (s, 3H), 1.44 (s, 3H); <sup>13</sup>C NMR (100 MHz, CDCl<sub>3</sub>): δ (ppm) 144.5, 143.2, 138.6, 137.1, 135.7, 134.9, 131.9, 131.7, 130.5, 130.2, 129.44, 129.38, 128.2, 127.3, 127.2, 127.1, 127.0, 126.3, 125.9, 123.7, 122.0, 121.2, 53.0, 33.2, 21.6, 21.5, 19.0, 9.4; HRMS (ESI-TOF) *m/z*: [M + Na]<sup>+</sup> Calcd for C<sub>34</sub>H<sub>34</sub>N<sub>2</sub>O<sub>4</sub>S<sub>2</sub>Na<sup>+</sup> 621.1852; Found 621.1861.

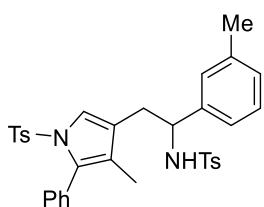

**Synthesis of 8c: General procedure C:** To an oven-dried 10 mL Schlenk tube equipped with a stirring bar were added 4-methyl-*N*-(1-phenylallyl)-*N*-(prop-2-yn-1-yl)benzenesulfonamide **5b** (65.0 mg, 0.200 mmol), 4-methyl-*N*-(3-methylbenzylidene)benzenesulfonamide **3c** (27.3 mg, 0.0999 mmol),

Pd(allyl)Cp (2.1 mg, 0.0099 mmol, 10 mol%), PPh<sub>3</sub> (5.2 mg, 0.020 mmol, 20 mol%), **A3** (3.0 mg, 0.020 mmol, 20 mol%) and 4 Å MS (40 mg). The tube was capped, evacuated and back-filled with argon for five times. Then degassed dry toluene (1.0 mL) was added via syringe. The mixture was stirred at 70 °C for 24 h, and monitored by TLC (EtOAc/petroleum ether = 1/5). After completion, the mixture was directly purified by flash chromatography on silica gel (EtOAc/petroleum ether = 1/6 to 1/5) to give product **8c**: 39.3 mg (0.0656 mmol), as a white thick oil, 66% yield; 10:90 rr; <sup>1</sup>H NMR (400 MHz, CDCl<sub>3</sub>): δ (ppm) 7.49 (d, *J* = 8.2 Hz, 2H), 7.35–7.28 (m, 3H), 7.17–7.11 (m, 6H), 7.07–7.03 (m, 2H), 7.02–6.96 (m, 3H), 6.79 (d, *J* = 7.6 Hz, 1H), 6.73 (s, 1H), 4.89 (brs, 1H), 4.37 (t, *J* = 7.0 Hz, 1H), 2.78 (d, *J* = 7.0 Hz, 2H), 2.37 (s, 3H), 2.36 (s, 3H), 2.20 (s, 3H), 1.43 (s, 3H); <sup>13</sup>C

NMR (100 MHz, CDCl<sub>3</sub>):  $\delta$  (ppm) 144.5, 143.2, 140.2, 138.0, 137.2, 135.7, 131.9, 131.7, 130.6, 129.5, 129.3, 128.4, 128.3, 128.1, 127.32, 127.28, 127.14, 127.07, 123.74, 123.73, 122.2, 121.2, 57.4, 33.9, 21.6, 21.5, 21.3, 9.5; HRMS (ESI-TOF)  $m/z$ :  $[M + Na]^+$  Calcd for C<sub>34</sub>H<sub>34</sub>N<sub>2</sub>O<sub>4</sub>S<sub>2</sub>Na<sup>+</sup> 621.1858; Found 621.1850.

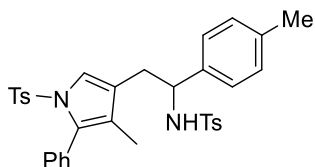

**Synthesis of 8d: General procedure C:** To an oven-dried 10 mL Schlenk tube equipped with a stirring bar were added 4-methyl-*N*-(1-phenylallyl)-*N*-(prop-2-yn-1-yl)benzenesulfonamide **5b** (65.0 mg, 0.200 mmol), 4-methyl-*N*-(4-methylbenzylidene)benzenesulfonamide **3d** (27.3 mg, 0.0999 mmol), Pd(allyl)Cp (2.1 mg, 0.0099 mmol, 10 mol%), PPh<sub>3</sub> (5.2 mg, 0.020 mmol, 20 mol%), **A3** (3.0 mg, 0.020 mmol, 20 mol%) and 4 Å MS (40 mg). The tube was capped, evacuated and back-filled with argon for five times. Then degassed dry toluene (1.0 mL) was added via syringe. The mixture was stirred at 70 °C for 96 h, and monitored by TLC (EtOAc/petroleum ether = 1/5). After completion, the mixture was directly purified by flash chromatography on silica gel (EtOAc/petroleum ether = 1/6 to 1/5) to give product **8d**: 40.1 mg (0.0670 mmol), as a yellow solid, 67% yield; 18:82 rr; mp 76–78 °C; <sup>1</sup>H NMR (400 MHz, CDCl<sub>3</sub>):  $\delta$  (ppm) 7.50 (d,  $J$  = 8.0 Hz, 2H), 7.42–7.29 (m, 3H), 7.13 (d,  $J$  = 6.0 Hz, 6H), 7.06–6.94 (m, 5H), 6.89 (d,  $J$  = 7.8 Hz, 2H), 4.75 (d,  $J$  = 5.6 Hz, 1H), 4.33 (dt,  $J$  = 6.6, 6.4 Hz, 1H), 2.79 (d,  $J$  = 7.0 Hz, 2H), 2.38 (s, 3H), 2.37 (s, 3H), 2.31 (s, 3H), 1.46 (s, 3H); <sup>13</sup>C NMR (100 MHz, CDCl<sub>3</sub>):  $\delta$  (ppm) 144.5, 143.2, 137.4, 137.1, 135.7, 131.9, 131.7, 130.5, 129.8, 129.4, 129.1, 128.6, 128.1, 127.3, 127.2, 127.1, 126.5, 123.7, 122.3, 121.2, 57.2, 33.9, 21.6, 21.5, 21.1, 9.5; HRMS (ESI-TOF)  $m/z$ :  $[M + Na]^+$  Calcd for C<sub>34</sub>H<sub>34</sub>N<sub>2</sub>O<sub>4</sub>S<sub>2</sub>Na<sup>+</sup> 621.1858; Found 621.1861.

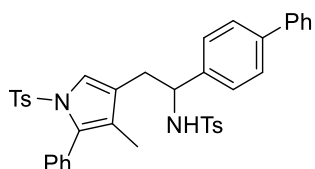

**Synthesis of 8e: General procedure C:** To an oven-dried 10 mL Schlenk tube equipped with a stirring bar were added 4-methyl-*N*-(1-phenylallyl)-*N*-(prop-2-yn-1-yl)benzenesulfonamide **5b** (65.0 mg, 0.200 mmol), *N*-[(1,1'-biphenyl)-4-ylmethylene]-4-methylbenzenesulfonamide **3e** (33.5 mg, 0.0999 mmol), Pd(allyl)Cp (2.1 mg, 0.0099 mmol, 10 mol%), PPh<sub>3</sub> (5.2 mg, 0.020 mmol, 20 mol%), **A3** (3.0 mg, 0.020 mmol, 20 mol%) and 4 Å MS (40 mg). The tube was capped, evacuated and back-filled with argon for five times. Then degassed dry toluene (1.0 mL) was added via syringe. The mixture was stirred at 70 °C for 24 h, and monitored by TLC (EtOAc/petroleum ether = 1/5). After completion, the mixture was directly purified by flash chromatography on silica gel

(EtOAc/petroleum ether = 1/6 to 1/5) to give product **8e**: 47.3 mg (0.0716 mmol), as a brown thick oil, 72% yield;  $<5:95$  rr;  $^1\text{H NMR}$  (400 MHz,  $\text{CDCl}_3$ ):  $\delta$  (ppm) 7.58–7.47 (m, 4H), 7.48–7.41 (m, 2H), 7.40–7.27 (m, 3H), 7.35–7.27 (m, 4H), 7.19–7.11 (m, 4H), 7.11–7.04 (m, 4H), 7.04–6.99 (m, 2H), 4.93–4.82 (m, 1H), 4.45 (dt,  $J = 6.6, 6.4$  Hz, 1H), 2.83 (d,  $J = 7.0$  Hz, 2H), 2.34 (s, 3H), 2.33 (s, 3H), 1.49 (s, 3H);  $^{13}\text{C NMR}$  (100 MHz,  $\text{CDCl}_3$ ):  $\delta$  (ppm) 144.5, 143.3, 140.6, 139.3, 137.1, 135.7, 132.0, 131.7, 130.5, 129.44, 129.42, 128.8, 128.5, 128.2, 127.4, 127.3, 127.2, 127.1, 127.12, 127.08, 127.06, 127.00, 123.6, 122.1, 121.2, 57.1, 33.9, 21.6, 21.5, 9.6; HRMS (ESI-TOF)  $m/z$ :  $[\text{M} + \text{Na}]^+$  Calcd for  $\text{C}_{39}\text{H}_{36}\text{N}_2\text{O}_4\text{S}_2\text{Na}^+$  683.2014; Found 683.2017.

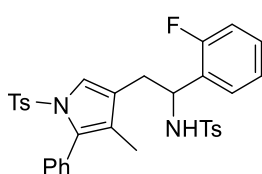

**Synthesis of 8f: General procedure C:** To an oven-dried 10 mL Schlenk tube equipped with a stirring bar were added 4-methyl-*N*-(1-phenylallyl)-*N*-(prop-2-yn-1-yl)benzenesulfonamide **5b** (65.0 mg, 0.200 mmol), *N*-(2-fluorobenzylidene)-4-methylbenzenesulfonamide **3m** (27.7 mg, 0.0999 mmol),

$\text{Pd}(\text{allyl})\text{Cp}$  (2.1 mg, 0.0099 mmol, 10 mol%),  $\text{PPh}_3$  (5.2 mg, 0.020 mmol, 20 mol%), **A3** (3.0 mg, 0.020 mmol, 20 mol%) and 4 Å MS (40 mg). The tube was capped, evacuated and back-filled with argon for five times. Then degassed dry toluene (1.0 mL) was added via syringe. The mixture was stirred at 70 °C for 24 h, and monitored by TLC (EtOAc/petroleum ether = 1/5). After completion, the mixture was directly purified by flash chromatography on silica gel (EtOAc/petroleum ether = 1/6 to 1/5) to give product **8f**: 32.3 mg (0.0536 mmol), as a yellow thick oil, 54% yield;  $<5:95$  rr;  $^1\text{H NMR}$  (400 MHz,  $\text{CDCl}_3$ ):  $\delta$  (ppm) 7.49 (d,  $J = 8.2$  Hz, 2H), 7.37–7.26 (m, 3H), 7.20–7.10 (m, 6H), 7.11–7.03 (m, 2H), 7.02–6.92 (m, 4H), 6.92–6.82 (m, 1H), 5.11–4.93 (m, 1H), 4.75–4.57 (m, 1H), 2.81 (d,  $J = 7.2$  Hz, 2H), 2.37 (s, 3H), 2.34 (s, 3H), 1.45 (s, 3H);  $^{13}\text{C NMR}$  (100 MHz,  $\text{CDCl}_3$ ):  $\delta$  (ppm) 144.6, 143.3, 136.8, 135.7, 131.7, 130.5, 129.5, 129.4, 129.2, 128.2, 127.3, 127.1, 127.0, 124.1, 123.5, 121.8, 121.2, 115.4 (d,  $^2J_{\text{FC}} = 21.7$  Hz), 52.7, 32.7, 21.6, 21.5, 9.4;  $^{19}\text{F NMR}$  (375 MHz,  $\text{CDCl}_3$ ):  $\delta$  (ppm) –119.2; HRMS (ESI-TOF)  $m/z$ :  $[\text{M} + \text{Na}]^+$  Calcd for  $\text{C}_{33}\text{H}_{31}\text{FN}_2\text{O}_4\text{S}_2\text{Na}^+$  625.1607; Found 625.1602.

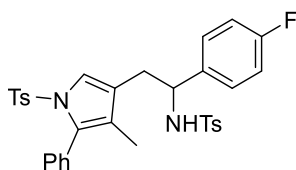

**Synthesis of 8g: General procedure C:** To an oven-dried 10 mL Schlenk tube equipped with a stirring bar were added 4-methyl-*N*-(1-phenylallyl)-*N*-(prop-2-yn-1-yl)benzenesulfonamide **5b** (65.0 mg, 0.200 mmol), *N*-(4-fluorobenzylidene)-4-methylbenzenesulfonamide **3f** (27.7 mg, 0.0999

mmol),  $\text{Pd}(\text{allyl})\text{Cp}$  (2.1 mg, 0.0099 mmol, 10 mol%),  $\text{PPh}_3$  (5.2 mg, 0.020 mmol, 20 mol%), **A3** (3.0

mg, 0.020 mmol, 20 mol%) and 4 Å MS (40 mg). The tube was capped, evacuated and back-filled with argon for five times. Then degassed dry toluene (1.0 mL) was added via syringe. The mixture was stirred at 70 °C for 12 h, and monitored by TLC (EtOAc/petroleum ether = 1/5). After completion, the mixture was directly purified by flash chromatography on silica gel (EtOAc/petroleum ether = 1/6 to 1/5) to give product **8g**: 43.6 mg (0.0724 mmol), as a yellow solid, 72% yield; <5:95 rr; mp 90–92 °C; <sup>1</sup>H NMR (400 MHz, CDCl<sub>3</sub>): δ (ppm) 7.48 (d, *J* = 8.2 Hz, 2H), 7.38–7.28 (m, 3H), 7.21–7.10 (m, 6H), 7.05–7.01 (m, 2H), 7.01–6.93 (m, 3H), 6.89–6.79 (m, 2H), 5.02–4.74 (brs, 1H), 4.38 (t, *J* = 7.2 Hz, 1H), 2.83–2.70 (m, 2H), 2.38 (s, 3H), 2.37 (s, 3H), 1.45 (s, 3H); <sup>13</sup>C NMR (100 MHz, CDCl<sub>3</sub>): δ (ppm) 162.1 (d, <sup>1</sup>*J*<sub>FC</sub> = 246.3 Hz), 144.6, 143.4, 137.0, 136.2 (d, <sup>4</sup>*J*<sub>FC</sub> = 3.2 Hz), 135.6, 132.1, 131.7, 130.4, 129.5, 128.4, 128.3 (d, <sup>3</sup>*J*<sub>FC</sub> = 4.2 Hz), 127.4, 127.1, 127.1, 123.4, 121.8, 121.1, 115.2 (d, <sup>2</sup>*J*<sub>FC</sub> = 21.3 Hz), 56.8, 34.0, 21.6, 21.5, 9.5; <sup>19</sup>F NMR (375 MHz, CDCl<sub>3</sub>): δ (ppm) –114.5; HRMS (ESI-TOF) *m/z*: [M + Na]<sup>+</sup> Calcd for C<sub>33</sub>H<sub>31</sub>FN<sub>2</sub>O<sub>4</sub>S<sub>2</sub>Na<sup>+</sup> 625.1607; Found 625.1612.

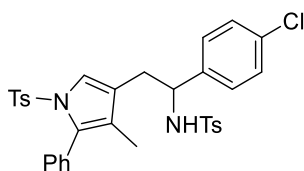

**Synthesis of 8h: General procedure C:** To an oven-dried 10 mL Schlenk tube equipped with a stirring bar were added 4-methyl-*N*-(1-phenylallyl)-*N*-(prop-2-yn-1-yl)benzenesulfonamide **5b** (65.0 mg, 0.200 mmol), *N*-(4-chlorobenzylidene)-4-methylbenzenesulfonamide **3g** (29.3 mg, 0.0997 mmol), Pd(allyl)Cp (2.1 mg, 0.0099 mmol, 10 mol%), PPh<sub>3</sub> (5.2 mg, 0.020 mmol, 20 mol%), **A3** (3.0 mg, 0.020 mmol, 20 mol%) and 4 Å MS (40 mg). The tube was capped, evacuated and back-filled with argon for five times. Then degassed dry toluene (1.0 mL) was added via syringe. The mixture was stirred at 70 °C for 12 h, and monitored by TLC (EtOAc/petroleum ether = 1/5). After completion, the mixture was directly purified by flash chromatography on silica gel (EtOAc/petroleum ether = 1/6 to 1/5) to give product **8h**: 45.4 mg (0.0733 mmol), as a yellow solid, 73% yield; <5:95 rr; mp 96–98 °C; <sup>1</sup>H NMR (400 MHz, CDCl<sub>3</sub>): δ (ppm) 7.46 (d, *J* = 8.2 Hz, 2H), 7.40–7.28 (m, 4H), 7.25–7.22 (m, 1H), 7.18–7.10 (m, 7H), 7.04–6.99 (m, 2H), 6.94 (d, *J* = 8.4 Hz, 2H), 4.94 (brs, 1H), 4.36 (t, *J* = 7.0 Hz, 1H), 2.78–2.72 (m, 1H), 2.48–2.41 (m, 1H), 2.39 (s, 3H), 2.37 (s, 3H), 1.46 (s, 3H); <sup>13</sup>C NMR (100 MHz, CDCl<sub>3</sub>): δ (ppm) 144.6, 143.5, 139.0, 136.9, 135.6, 133.4, 132.1, 131.7, 130.4, 129.5, 128.5, 128.2, 128.1, 127.4, 127.3, 127.12, 127.08, 123.3, 121.6, 121.1, 56.8, 33.9, 21.6, 21.5, 9.6; HRMS (ESI-TOF) *m/z*: [M + Na]<sup>+</sup> Calcd for C<sub>33</sub>H<sub>31</sub><sup>35</sup>ClN<sub>2</sub>O<sub>4</sub>S<sub>2</sub>Na<sup>+</sup> 641.1311; Found 641.1309; Calcd for C<sub>33</sub>H<sub>31</sub><sup>37</sup>ClN<sub>2</sub>O<sub>4</sub>S<sub>2</sub>Na<sup>+</sup> 643.1282; Found 643.1290.

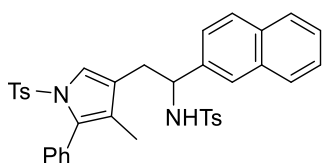

**Synthesis of 8i: General procedure C:** To an oven-dried 10 mL Schlenk tube equipped with a stirring bar were added 4-methyl-*N*-(1-phenylallyl)-*N*-(prop-2-yn-1-yl)benzenesulfonamide **5b** (65.0 mg, 0.200 mmol), 4-methyl-*N*-(naphthalen-2-ylmethylene)benzenesulfonamide **3h** (30.9 mg, 0.0999 mmol), Pd(allyl)Cp (2.1 mg, 0.0099 mmol, 10 mol%), PPh<sub>3</sub> (5.2 mg, 0.020 mmol, 20 mol%), **A3** (3.0 mg, 0.020 mmol, 20 mol%) and 4 Å MS (40 mg). The tube was capped, evacuated and back-filled with argon for five

times. Then degassed dry toluene (1.0 mL) was added via syringe. The mixture was stirred at 70 °C for 36 h, and monitored by TLC (EtOAc/petroleum ether = 1/5). After completion, the mixture was directly purified by flash chromatography on silica gel (EtOAc/petroleum ether = 1/6 to 1/5) to give product **8i**: 43.7 mg (0.0689 mmol), as a yellow solid, 69% yield; 14:86 rr; mp 98–100 °C; <sup>1</sup>H NMR (400 MHz, CDCl<sub>3</sub>): δ (ppm) 7.88 (d, *J* = 8.0 Hz, 1H), 7.84–7.79 (m, 1H), 7.70 (d, *J* = 8.2 Hz, 1H), 7.51–7.39 (m, 4H), 7.36–7.26 (m, 4H), 7.16–7.05 (m, 6H), 7.04–6.94 (m, 4H), 5.29 (dt, *J* = 6.8, 6.4 Hz, 1H), 4.99 (d, *J* = 6.2 Hz, 1H), 3.07–2.99 (m, 1H), 2.98–2.88 (m, 1H), 2.36 (s, 3H), 2.29 (s, 3H), 1.35 (s, 3H); <sup>13</sup>C NMR (100 MHz, CDCl<sub>3</sub>): δ (ppm) 144.5, 143.2, 136.8, 135.9, 135.5, 133.7, 132.0, 131.6, 130.5, 130.4, 129.4, 129.3, 129.0, 128.2, 128.1, 127.3, 127.1, 127.0, 126.3, 125.6, 125.0, 124.2, 123.8, 122.2, 122.1, 121.3, 53.1, 33.0, 21.6, 21.4, 9.5; HRMS (ESI-TOF) *m/z*: [M + Na]<sup>+</sup> Calcd for C<sub>37</sub>H<sub>34</sub>N<sub>2</sub>O<sub>4</sub>S<sub>2</sub>Na<sup>+</sup> 657.1852; Found 657.1859.

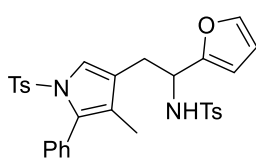

**Synthesis of 8j: General procedure C:** To an oven-dried 10 mL Schlenk tube equipped with a stirring bar were added 4-methyl-*N*-(1-phenylallyl)-*N*-(prop-2-yn-1-yl)benzenesulfonamide **5b** (65.0 mg, 0.200 mmol), *N*-(furan-2-ylmethylene)-4-methylbenzenesulfonamide **3i** (24.9 mg, 0.0999 mmol), Pd(allyl)Cp (2.1 mg, 0.0099

mmol, 10 mol%), PPh<sub>3</sub> (5.2 mg, 0.020 mmol, 20 mol%), **A3** (3.0 mg, 0.020 mmol, 20 mol%) and 4 Å MS (40 mg). The tube was capped, evacuated and back-filled with argon for five times. Then degassed dry toluene (1.0 mL) was added via syringe. The mixture was stirred at 70 °C for 36 h, and monitored by TLC (EtOAc/petroleum ether = 1/5). After completion, the mixture was directly purified by flash chromatography on silica gel (EtOAc/petroleum ether = 1/6 to 1/5) to give products **7j** and **8j** as inseparable regioselective isomers: 40.4 mg (0.0703 mmol), as a white solid, 70% yield; 20:80 rr; mp 63–65 °C; For **8j** <sup>1</sup>H NMR (400 MHz, CDCl<sub>3</sub>): δ (ppm) 7.61 (d, *J* = 8.0 Hz, 2H), 7.35–7.28 (m, 3H), 7.25–7.17 (m, 4H), 7.12 (t, *J* = 6.3 Hz, 5H), 7.04–6.98 (m, 2H), 6.96 (s, 1H), 6.18 (t, *J* = 3.2, 1.8 Hz, 1H), 5.87 (d, *J* = 3.2 Hz, 1H), 4.82 (d, *J* = 8.2 Hz, 1H), 4.57 (dt, *J* = 7.4, 7.2 Hz, 1H),

2.90 (d,  $J = 7.0$  Hz, 2H), 2.40 (s, 3H), 2.36 (s, 3H), 1.57 (s, 3H);  $^{13}\text{C}$  NMR (100 MHz,  $\text{CDCl}_3$ ):  $\delta$  (ppm) 152.3, 144.4, 143.3, 142.0, 137.4, 135.7, 131.7, 130.6, 129.5, 129.4, 129.3, 128.1, 127.3, 127.1, 127.0, 123.6, 121.7, 121.2, 110.2, 107.5, 51.5, 31.1, 21.6, 21.5, 9.5; HRMS (ESI-TOF)  $m/z$ :  $[\text{M} + \text{Na}]^+$  Calcd for  $\text{C}_{31}\text{H}_{30}\text{N}_2\text{O}_5\text{S}_2\text{Na}^+$  597.1494; Found 597.1497.

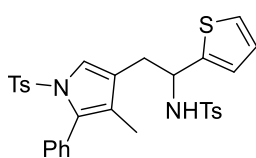

**Synthesis of 8k: General procedure C:** To an oven-dried 10 mL Schlenk tube equipped with a stirring bar were added 4-methyl-*N*-(1-phenylallyl)-*N*-(prop-2-yn-1-yl)benzenesulfonamide **5b** (65.0 mg, 0.200 mmol), 4-methyl-*N*-(thiophen-2-ylmethylene)benzenesulfonamide **3j** (26.5 mg, 0.0999 mmol), Pd(allyl)Cp (2.1 mg, 0.0099 mmol, 10 mol%),  $\text{PPh}_3$  (5.2 mg, 0.020 mmol, 20 mol%), **A3** (3.0 mg, 0.020 mmol, 20 mol%) and 4 Å MS (40 mg). The tube was capped, evacuated and back-filled with argon for five times. Then degassed dry toluene (1.0 mL) was added via syringe. The mixture was stirred at 70 °C for 36 h, and monitored by TLC (EtOAc/petroleum ether = 1/5). After completion, the mixture was directly purified by flash chromatography on silica gel (EtOAc/petroleum ether = 1/6 to 1/5) to give product **8k**: 35.4 mg (0.0599 mmol), as a yellow solid, 60% yield; 26:74 rr; mp 68–69 °C;  $^1\text{H}$  NMR (400 MHz,  $\text{CDCl}_3$ ):  $\delta$  (ppm) 7.60 (d,  $J = 8.0$  Hz, 2H), 7.36–7.27 (m, 3H), 7.21 (d,  $J = 8.0$  Hz, 2H), 7.15 (d,  $J = 5.2$  Hz, 1H), 7.12–7.07 (m, 4H), 7.05–6.99 (m, 3H), 6.83 (t,  $J = 5.0, 3.4$  Hz, 1H), 6.68 (d,  $J = 3.4$  Hz, 1H), 4.87–4.80 (m, 1H), 4.79–4.70 (m, 1H), 3.05–2.83 (m, 2H), 2.40 (s, 3H), 2.36 (s, 3H), 1.58 (s, 3H);  $^{13}\text{C}$  NMR (100 MHz,  $\text{CDCl}_3$ ):  $\delta$  (ppm) 144.4, 144.1, 143.4, 137.2, 135.7, 131.8, 131.7, 130.5, 129.5, 129.4, 128.5, 128.1, 127.3, 127.1, 127.0, 126.6, 125.2, 124.9, 123.6, 121.8, 121.3, 53.3, 34.6, 21.6, 21.5, 9.6; HRMS (ESI-TOF)  $m/z$ :  $[\text{M} + \text{Na}]^+$  Calcd for  $\text{C}_{31}\text{H}_{30}\text{N}_2\text{O}_4\text{S}_3\text{Na}^+$  613.1266; Found 613.1262.

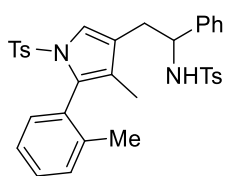

**Synthesis of 8l: General procedure C:** To an oven-dried 10 mL Schlenk tube equipped with a stirring bar were added 4-methyl-*N*-(prop-2-yn-1-yl)-*N*-(1-(*o*-tolyl)allyl)benzenesulfonamide **5l** (67.8 mg, 0.200 mmol), *N*-benzylidene-4-methylbenzenesulfonamide **3a** (25.9 mg, 0.100 mmol), Pd(allyl)Cp (2.1 mg, 0.0099 mmol, 10 mol%),  $\text{PPh}_3$  (5.2 mg, 0.020 mmol, 20 mol%), **A3** (3.0 mg, 0.020 mmol, 20 mol%) and 4 Å MS (40 mg). The tube was capped, evacuated and back-filled with argon for five times. Then degassed dry toluene (1.0 mL) was added via syringe. The mixture was stirred at 70 °C for 36 h, and monitored by TLC (EtOAc/petroleum ether = 1/5). After completion, the mixture was directly purified by flash chromatography on silica gel (EtOAc/petroleum ether = 1/6 to 1/5) to give the



product **8l**: 43.6 mg (0.0728 mmol), as a yellow solid, 73% yield; <5:95 rr; 1:1 dr for atropisomer; mp 74–75 °C; <sup>1</sup>H NMR (400 MHz, CDCl<sub>3</sub>): δ (ppm) 7.56 (d, *J* = 8.2 Hz, 2H), 7.53 (d, *J* = 8.2 Hz, 2H), 7.24–7.10 (m, 20H), 7.09–7.03 (m, 4H), 7.01–6.89 (m, 6H), 6.74 (d, *J* = 1.6 Hz, 1H), 6.73 (d, *J* = 1.6 Hz, 1H), 4.99–4.86 (m, 2H), 4.53–4.31 (m, 2H), 3.02–2.68 (m, 4H), 2.40–2.38 (m, 6H), 2.38–2.35 (m, 6H), 1.73 (s, 3H), 1.71 (s, 3H), 1.37–1.27 (m, 6H); <sup>13</sup>C NMR (100 MHz, CDCl<sub>3</sub>): δ (ppm) 144.6, 144.5, 143.3, 140.3, 140.2, 139.9, 139.8, 137.3, 137.2, 135.9, 135.8, 132.3, 132.2, 130.4, 130.3, 130.1, 130.0, 129.44, 129.42, 129.35, 128.84, 128.78, 128.39, 128.36, 127.59, 127.57, 127.4, 127.1, 126.7, 126.6, 124.63, 124.60, 123.3, 123.1, 121.5, 121.1, 120.4, 58.1, 57.5, 34.1, 34.0, 21.6, 21.5, 19.50, 19.47, 9.2; HRMS (ESI-TOF) *m/z*: [M + Na]<sup>+</sup> Calcd for C<sub>34</sub>H<sub>34</sub>N<sub>2</sub>O<sub>4</sub>S<sub>2</sub>Na<sup>+</sup> 621.1858; Found 621.1859.

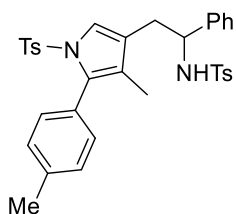

**Synthesis of 8m: General procedure C:** To an oven-dried 10 mL Schlenk tube equipped with a stirring bar were added 4-methyl-*N*-(prop-2-yn-1-yl)-*N*-(1-(*p*-tolyl)allyl)benzenesulfonamide **5d** (67.8 mg, 0.200 mmol), *N*-benzylidene-4-methylbenzenesulfonamide **3a** (25.9 mg, 0.100 mmol), Pd(allyl)Cp (2.1 mg,

0.0099 mmol, 10 mol%), PPh<sub>3</sub> (5.2 mg, 0.020 mmol, 20 mol%), **A3** (3.0 mg, 0.020 mmol, 20 mol%) and 4 Å MS (40 mg). The tube was capped, evacuated and back-filled with argon for five times. Then degassed dry toluene (1.0 mL) was added via syringe. The mixture was stirred at 70 °C for 12 h, and monitored by TLC (EtOAc/petroleum ether = 1/5). After completion, the mixture was directly purified by flash chromatography on silica gel (EtOAc/petroleum ether = 1/6 to 1/5) to give product **8m**: 37.3 mg (0.0623 mmol), as a yellow solid, 62% yield; 18:82 rr; mp 101–103 °C; <sup>1</sup>H NMR (400 MHz, CDCl<sub>3</sub>): δ (ppm) 7.49 (d, *J* = 8.2 Hz, 2H), 7.21–7.14 (m, 7H), 7.14–7.09 (m, 3H), 7.01–6.95 (m, 3H), 6.90 (d, *J* = 8.0 Hz, 2H), 4.84 (brs, 1H), 4.38 (t, *J* = 7.0 Hz, 1H), 2.77 (d, *J* = 7.0 Hz, 2H), 2.39 (s, 3H), 2.38–2.34 (m, 6H), 1.41 (s, 3H); <sup>13</sup>C NMR (100 MHz, CDCl<sub>3</sub>): δ (ppm) 144.5, 143.3, 140.4, 138.0, 137.0, 135.7, 132.1, 131.5, 129.4, 129.3, 128.4, 128.1, 127.6, 127.5, 127.12, 127.09, 126.6, 123.6, 122.2, 121.1, 57.4, 34.0, 21.6, 21.5, 21.4, 9.5; HRMS (ESI-TOF) *m/z*: [M + Na]<sup>+</sup> Calcd for C<sub>34</sub>H<sub>34</sub>N<sub>2</sub>O<sub>4</sub>S<sub>2</sub>Na<sup>+</sup> 621.1858; Found 621.1860.

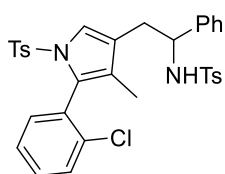

**Synthesis of 8n: General procedure C:** To an oven-dried 10 mL Schlenk tube equipped with a stirring bar were added *N*-(1-(2-chlorophenyl)allyl)-4-methyl-*N*-(prop-2-yn-1-yl)benzenesulfonamide **5m** (71.8 mg, 0.200 mmol), *N*-benzylidene-4-methylbenzenesulfonamide **3a** (25.9 mg, 0.100 mmol), Pd(allyl)Cp (2.1

mg, 0.0099 mmol, 10 mol%), PPh<sub>3</sub> (5.2 mg, 0.020 mmol, 20 mol%), **A3** (3.0 mg, 0.020 mmol, 20 mol%) and 4 Å MS (40 mg). The tube was capped, evacuated and back-filled with argon for five times. Then degassed dry toluene (1.0 mL) was added via syringe. The mixture was stirred at 70 °C for 36 h, and monitored by TLC (EtOAc/petroleum ether = 1/5). After completion, the mixture was directly purified by flash chromatography on silica gel (EtOAc/petroleum ether = 1/6 to 1/5) to give product **8n**: 41.9 mg (0.0677 mmol), as a light yellow solid, 67% yield; <5:95 rr; 1:1 dr for atropisomer; mp 71–72 °C; <sup>1</sup>H NMR (400 MHz, CDCl<sub>3</sub>): δ (ppm) 7.59–7.51 (m, 4H), 7.33–7.27 (m, 1H), 7.26–7.21 (m, 4H), 7.20–7.12 (m, 16H), 7.11–7.04 (m, 2H), 7.03–6.95 (m, 4H), 6.94–6.90 (m, 2H), 4.98–4.72 (m, 2H), 4.54–4.24 (m, 2H), 3.02–2.63 (m, 4H), 2.40–2.38 (m, 6H), 2.38 (s, 3H), 2.36 (s, 3H), 1.44–1.28 (m, 6H); <sup>13</sup>C NMR (100 MHz, CDCl<sub>3</sub>): δ (ppm) 144.6, 143.3, 143.3, 140.11, 140.08, 137.2, 137.1, 136.3, 136.20, 135.7, 135.6, 134.4, 134.2, 130.1, 129.72, 129.67, 129.56, 129.54, 129.49, 129.4, 128.9, 128.40, 128.38, 127.84, 127.79, 127.6, 127.5, 127.3, 127.2, 127.14, 127.12, 126.7, 126.6, 125.7, 124.9, 124.8, 121.5, 121.3, 121.0, 120.9, 58.0, 57.4, 34.0, 33.8, 21.6, 21.50, 21.48, 9.4; HRMS (ESI-TOF) m/z: [M + Na]<sup>+</sup> Calcd for C<sub>33</sub>H<sub>31</sub><sup>35</sup>ClN<sub>2</sub>O<sub>4</sub>S<sub>2</sub>Na<sup>+</sup> 641.1311; Found 641.1304; Calcd for C<sub>33</sub>H<sub>31</sub><sup>37</sup>ClN<sub>2</sub>O<sub>4</sub>S<sub>2</sub>Na<sup>+</sup> 643.1282; Found 643.1288.

## 7. Asymmetric auto-tandem catalytic reaction exploration

**Table S7.1.** Detailed screening conditions for asymmetric auto-tandem catalysis<sup>a</sup>

| Entry    | [Pd]                                 | L         | Acid      | x         | Yield (%) <sup>b</sup> | ee <sup>c</sup> |
|----------|--------------------------------------|-----------|-----------|-----------|------------------------|-----------------|
| <b>1</b> | <b>Pd<sub>2</sub>dba<sub>3</sub></b> | <b>L6</b> | <b>A1</b> | <b>20</b> | <b>88</b>              | <b>46</b>       |
| 2        | Pd <sub>2</sub> dba <sub>3</sub>     | L7        | A1        | 20        | 50                     | 41              |

|                 |                                                     |            |           |     |       |    |
|-----------------|-----------------------------------------------------|------------|-----------|-----|-------|----|
| 3               | Pd <sub>2</sub> dba <sub>3</sub>                    | <b>L8</b>  | <b>A1</b> | 20  | 36    | -8 |
| 4               | Pd <sub>2</sub> dba <sub>3</sub>                    | <b>L9</b>  | <b>A1</b> | 20  | trace | /  |
| 5               | Pd <sub>2</sub> dba <sub>3</sub>                    | <b>L10</b> | <b>A1</b> | 20  | trace | /  |
| 6               | Pd <sub>2</sub> dba <sub>3</sub>                    | <b>L11</b> | <b>A1</b> | 20  | NR    | /  |
| 7               | Pd <sub>2</sub> dba <sub>3</sub>                    | <b>L12</b> | <b>A1</b> | 20  | NR    | /  |
| 8               | Pd <sub>2</sub> dba <sub>3</sub>                    | <b>L13</b> | <b>A1</b> | 20  | 42    | -3 |
| 9               | Pd <sub>2</sub> dba <sub>3</sub>                    | <b>L14</b> | <b>A1</b> | 20  | 36    | 1  |
| 10              | Pd <sub>2</sub> dba <sub>3</sub>                    | <b>L15</b> | <b>A1</b> | 20  | 38    | 4  |
| 11              | Pd <sub>2</sub> dba <sub>3</sub>                    | <b>L16</b> | <b>A1</b> | 20  | 84    | 2  |
| 12              | Pd(OAc) <sub>2</sub>                                | <b>L6</b>  | <b>A1</b> | 20  | 26    | 45 |
| 13              | Pd(allyl)Cp                                         | <b>L6</b>  | <b>A1</b> | 20  | 49    | 46 |
| 14              | [Pd(allyl)Cl] <sub>2</sub>                          | <b>L6</b>  | <b>A1</b> | 20  | messy | /  |
| 15              | Pd <sub>2</sub> dba <sub>3</sub> ·CHCl <sub>3</sub> | <b>L6</b>  | <b>A1</b> | 20  | 63    | 40 |
| 16              | Pddba <sub>2</sub>                                  | <b>L6</b>  | <b>A1</b> | 20  | 62    | 42 |
| 17              | Pd <sub>2</sub> dba <sub>3</sub>                    | <b>L6</b>  | <b>A3</b> | 20  | 88    | 37 |
| 18              | Pd <sub>2</sub> dba <sub>3</sub>                    | <b>L6</b>  | <b>A4</b> | 20  | 78    | 31 |
| 19              | Pd <sub>2</sub> dba <sub>3</sub>                    | <b>L6</b>  | <b>A6</b> | 20  | 29    | 33 |
| 20              | Pd <sub>2</sub> dba <sub>3</sub>                    | <b>L6</b>  | <b>A1</b> | 10  | 48    | 43 |
| 21              | Pd <sub>2</sub> dba <sub>3</sub>                    | <b>L6</b>  | <b>A1</b> | 60  | 81    | 24 |
| 22              | Pd <sub>2</sub> dba <sub>3</sub>                    | <b>L6</b>  | <b>A1</b> | 100 | 98    | 8  |
| 23 <sup>d</sup> | Pd <sub>2</sub> dba <sub>3</sub>                    | <b>L6</b>  | <b>A1</b> | 20  | 60    | 26 |
| 24 <sup>e</sup> | Pd <sub>2</sub> dba <sub>3</sub>                    | <b>L6</b>  | <b>A1</b> | 20  | messy | /  |

<sup>a</sup> Unless noted otherwise, reactions were performed with 1,6-enyne **5a** (0.1 mmol), imine **3a** (0.05 mmol), [Pd] source (10 mol%), **L** (20 mol%), acid (x mol%) and 4 Å MS (20 mg) in degassed dry toluene (0.5 mL) at 70 °C for 12 h under Ar. <sup>b</sup> Isolated yield. <sup>c</sup> Determined by HPLC analysis on a chiral stationary phase. <sup>d</sup> With *t*-BuOH (0.1 mmol). <sup>e</sup> At 60 °C.

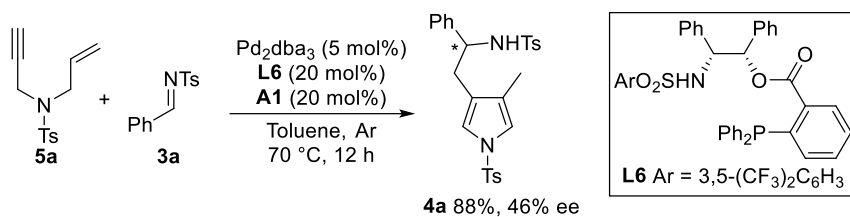

**Asymmetric synthesis of 4a via asymmetric catalysis:** To an oven-dried 10 mL Schlenk tube equipped with a stirring bar were added Pd<sub>2</sub>dba<sub>3</sub> (4.6 mg, 0.0050 mmol, 5 mol%), **L6** (15.6 mg, 0.0200 mmol, 20 mol%) and **A1** (2.4 mg, 0.020 mmol, 20 mol%). The tube was capped, evacuated and back-filled with argon for five times. Then degassed dry toluene (0.5 mL) was added via syringe. The mixture was stirred for 30 min at room temperature. Then *N*-allyl-4-methyl-*N*-(prop-2-yn-1-yl)benzenesulfonamide **5a** (49.8 mg, 0.200 mmol) and *N*-benzylidene-4-methylbenzene sulfonamide **3a** (25.9 mg, 0.100 mmol) in degassed dry toluene (0.5 mL) were added to the mixture via syringe under argon atmosphere (0.1 M total concentration), and the tube was evacuated and back-filled with argon for five times again. The mixture was stirred at 70 °C for 12 h, and monitored by TLC (EtOAc/petroleum ether = 1/5). After completion, the mixture was directly purified by flash chromatography on silica gel (EtOAc/petroleum ether = 1/5) to give product **4a**: 44.9 mg (0.0883 mmol), as white solid, 88% yield;  $[\alpha]_D^{25} = 13.6$  ( $c = 1.50$  in CHCl<sub>3</sub>); 46% ee, determined by HPLC analysis (Daicel chiralpak AD-H, *n*-hexane/*i*-PrOH = 60/40, flow rate = 1.0 mL/min,  $\lambda = 254$  nm)  $t_R = 9.99$  min (minor),  $t_R = 11.83$  min (major).

The above reaction was performed with *t*-BuOH (14.8 mg, 19.1  $\mu$ L, 0.200 mmol) as additive to give product **4a**: 30.5 mg (0.0600 mmol), 60% yield, 26% ee.

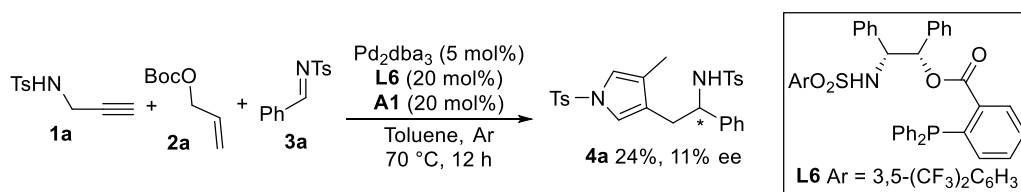

**Asymmetric synthesis of 4a via three component auto-tandem catalysis:** To an oven-dried 10 mL Schlenk tube equipped with a stirring bar were added Pd<sub>2</sub>dba<sub>3</sub> (4.6 mg, 0.0050 mmol, 5 mol%), **L6** (15.6 mg, 0.0200 mmol, 20 mol%) and **A1** (2.4 mg, 0.020 mmol, 20 mol%). The tube was capped, evacuated and back-filled with argon for five times. Then degassed dry toluene (0.5 mL) was added via syringe. The mixture was stirred for 30 min at room temperature. Then 4-methyl-*N*-(prop-2-yn-1-yl)benzenesulfonamide **1a** (42.0 mg, 0.201 mmol), allyl *tert*-butyl carbonate **2a** (31.6 mg, 0.200

mmol) and *N*-benzylidene-4-methylbenzenesulfonamide **3a** (25.9 mg, 0.100 mmol) in degassed dry toluene (0.5 mL) were added to the mixture via syringe sequentially under argon atmosphere (0.1 M total concentration), and the tube was evacuated and back-filled with argon for five times again. The mixture was stirred at 70 °C for 12 h, and monitored by TLC (EtOAc/petroleum ether = 1/5). After completion, the mixture was directly purified by flash chromatography on silica gel (EtOAc/petroleum ether = 1/5) to give product **4a**: 12.2 mg (0.0240 mmol), as a white solid, 24% yield; 11% ee, determined by HPLC analysis (Daicel chiralpak AD-H, *n*-hexane/*i*-PrOH = 60/40, flow rate = 1.0 mL/min,  $\lambda = 254$  nm)  $t_R = 10.00$  min (minor),  $t_R = 11.87$  min (major).

## 8. Asymmetric synthesis through remote chirality transfer

**Table S8.1.** Detailed screening conditions for asymmetric synthesis of (*R*)-**7a** from (*S*)-**1b**<sup>a</sup>

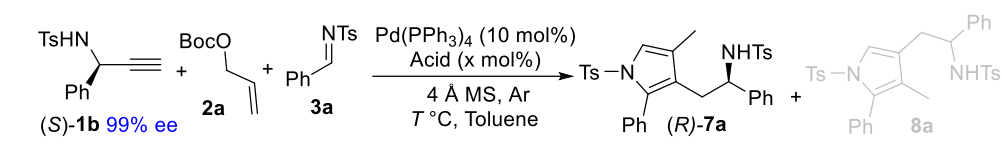



**A1** R<sup>1</sup> = R<sup>2</sup> = H  
**A2** R<sup>1</sup> = H, R<sup>2</sup> = F



**A4**



**A8** R<sup>1</sup> = F  
**A9** R<sup>1</sup> = CF<sub>3</sub>  
**A10** R<sup>1</sup> = NO<sub>2</sub>

| Entry | Acid       | x   | T (°C) | Yield (%) <sup>b</sup> | rr <sup>c</sup> | ee <sup>d</sup> |
|-------|------------|-----|--------|------------------------|-----------------|-----------------|
| 1     | <b>A1</b>  | 40  | 80     | 82                     | 84:16           | 97/80           |
| 2     | <b>A2</b>  | 40  | 80     | 81                     | 97:3            | 97/ND           |
| 3     | <b>A4</b>  | 40  | 80     | trace                  | /               | /               |
| 4     | <b>A8</b>  | 40  | 80     | 56                     | 96:4            | 96/ND           |
| 5     | <b>A9</b>  | 40  | 80     | trace                  | /               | /               |
| 6     | <b>A10</b> | 40  | 80     | trace                  | /               | /               |
| 7     | <b>A2</b>  | 60  | 80     | 79                     | 92:8            | 96/ND           |
| 8     | <b>A2</b>  | 100 | 80     | 57                     | 99:1            | 94/ND           |
| 9     | <b>A2</b>  | 40  | 60     | messy                  | /               | /               |
| 10    | <b>A2</b>  | 40  | 100    | 53                     | 80:20           | 94/60           |

<sup>a</sup> Unless noted otherwise, reactions were performed with (*S*)-**1b** (0.1 mmol), **2a** (0.15 mmol), **3a** (0.05 mmol), Pd(PPh<sub>3</sub>)<sub>4</sub> (10 mol%), acid (x mol%) and 4 Å MS (20 mg) in degassed dry toluene (0.5 mL) for 96 h under Ar. <sup>b</sup> Isolated yield of (*R*)-**7a**. <sup>c</sup> rr = **7a**:**8a**, determined by <sup>1</sup>H NMR analysis. <sup>d</sup> Determined by HPLC analysis on a chiral stationary phase.

**Table S8.2.** Detailed screening conditions for asymmetric synthesis of (*S*)-**7a** from (*R*)-**5b**<sup>a</sup>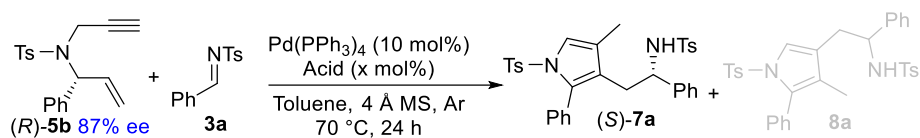

| Entry | Acid      | x          | Yield (%) <sup>b</sup> | rr <sup>c</sup> | ee <sup>d</sup> |
|-------|-----------|------------|------------------------|-----------------|-----------------|
|       |           |            |                        |                 |                 |
| 1     | <b>A1</b> | 20         | 75                     | 50:50           | 83/59           |
| 2     | <b>A1</b> | 50         | 90                     | 75:25           | 78/70           |
| 3     | <b>A1</b> | 100        | 91                     | 94:6            | 70/ND           |
| 4     | <b>A2</b> | 20         | 65                     | 63:37           | 70/65           |
| 5     | <b>A3</b> | 20         | 60                     | 54:46           | 70/64           |
| 6     | <b>A4</b> | 20         | 52                     | 75:25           | 87/75           |
| 7     | <b>A4</b> | <b>100</b> | <b>48</b>              | <b>97:3</b>     | <b>86/ND</b>    |

<sup>a</sup> Unless noted otherwise, reactions were performed with (*R*)-**5b** (0.1 mmol), **3a** (0.05 mmol), Pd(PPh<sub>3</sub>)<sub>4</sub> (10 mol%), acid (x mol%) and 4 Å MS (20 mg) in degassed dry toluene (0.5 mL) at 70 °C for 24 h under Ar. <sup>b</sup> Isolated yield of (*S*)-**7a**. <sup>c</sup> rr = **7a**:**8a**, determined by <sup>1</sup>H-NMR analysis. <sup>d</sup> Determined by HPLC analysis on a chiral stationary phase.

**Table S8.3.** Detailed screening conditions for asymmetric synthesis of (*R*)-**8a** from (*R*)-**5b**<sup>a</sup>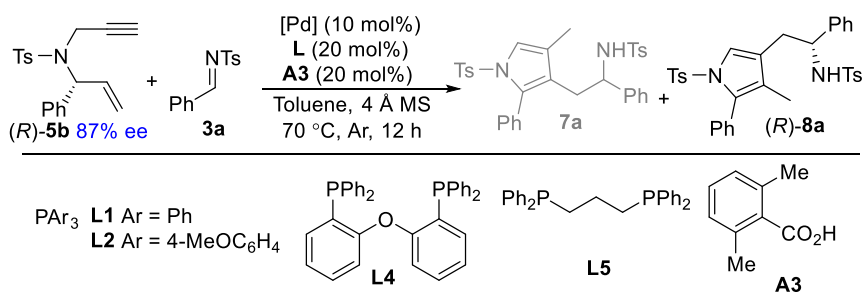

| Entry | [Pd]               | L         | Yield (%) <sup>b</sup> | rr <sup>c</sup> | ee <sup>d</sup> |
|-------|--------------------|-----------|------------------------|-----------------|-----------------|
| 1     | <b>Pd(allyl)Cp</b> | <b>L1</b> | <b>75</b>              | <b>5:95</b>     | <b>ND/68</b>    |
| 2     | Pd(allyl)Cp        | <b>L2</b> | 48                     | 17:83           | 85/66           |
| 3     | Pd(allyl)Cp        | <b>L4</b> | trace                  | /               | /               |
| 4     | Pd(allyl)Cp        | <b>L5</b> | NR                     | /               | /               |

5 Pd(cinnamyl)Cp L1 88 75:25 85/65

<sup>a</sup> Unless noted otherwise, reactions were performed with (*R*)-**5b** (0.1 mmol), **3a** (0.05 mmol), [Pd] source (10 mol%), **L** (20 mol%), **A3** (20 mol%) and 4 Å MS (20 mg) in degassed dry toluene (0.5 mL) at 70 °C for 24 h under Ar.

<sup>b</sup> Isolated yield of (*R*)-**8a**. <sup>c</sup> rr = **7a**:**8a**, determined by <sup>1</sup>H-NMR analysis. <sup>d</sup> Determined by HPLC analysis on a chiral stationary phase.

## 8.1 Asymmetric synthesis of chiral product (*R*)-**7** from (*S*)-**1**

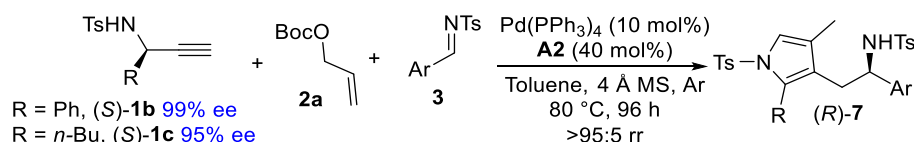

**General procedure D:** To an oven-dried 10 mL Schlenk tube equipped with a stirring bar were added (*S*)-4-methyl-*N*-(1-phenylprop-2-yn-1-yl)benzenesulfonamide (*S*)-**1b** (57.0 mg, 0.200 mmol) or (*S*)-*N*-(hept-1-yn-3-yl)-4-methylbenzenesulfonamide (*S*)-**1c** (63.0 mg, 0.0200 mmol), allyl *tert*-butyl carbonate **2a** (47.4 mg, 0.299 mmol), aldimine **3** (0.100 mmol), Pd(PPh<sub>3</sub>)<sub>4</sub> (11.6 mg, 0.0100 mmol, 10 mol%), **A2** (5.6 mg, 0.040 mmol, 40 mol%) and 4 Å MS (40 mg). The tube was capped, evacuated and back-filled with argon for five times. Then degassed dry toluene (1.0 mL) was added via syringe. The mixture was stirred at 80 °C for 96 h, and monitored by TLC (EtOAc/petroleum ether = 1/5). After completion, the mixture was directly purified by flash chromatography on silica gel (EtOAc/petroleum ether = 1/5) to give chiral product (*R*)-**7**.

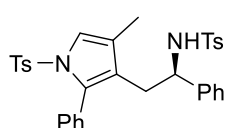

**Synthesis of chiral (*R*)-**7a**: General procedure D:** To an oven-dried 10 mL Schlenk tube equipped with a stirring bar were added (*S*)-4-methyl-*N*-(1-phenylprop-2-yn-1-yl)benzenesulfonamide (*S*)-**1b** (57.0 mg, 0.200 mmol), allyl

*tert*-butyl carbonate **2a** (47.4 mg, 0.299 mmol), *N*-benzylidene-4-methylbenzenesulfonamide **3a** (25.9 mg, 0.100 mmol), Pd(PPh<sub>3</sub>)<sub>4</sub> (11.6 mg, 0.0100 mmol, 10 mol%), **A2** (5.6 mg, 0.040 mmol, 40 mol%) and 4 Å MS (40 mg). The tube was capped, evacuated and back-filled with argon for five times. Then degassed dry toluene (1.0 mL) was added via syringe. The mixture was stirred at 80 °C for 96 h, and monitored by TLC (EtOAc/petroleum ether = 1/5). After completion, the mixture was directly purified by flash chromatography on silica gel (EtOAc/petroleum ether = 1/5) to give chiral product (*R*)-**7a**: 46.7 mg (0.0798 mmol), as a white solid, 80% yield; >95:5 rr; [α]<sub>D</sub><sup>25</sup> = 28.9 (*c* = 0.27 in CHCl<sub>3</sub>); 97% ee, determined by HPLC analysis (Daicel chiralpak AD-H, *n*-hexane/*i*-PrOH =

80/20, flow rate = 1.0 mL/min,  $l = 254$  nm)  $t_R = 18.33$  min (minor),  $t_R = 20.76$  min (major).

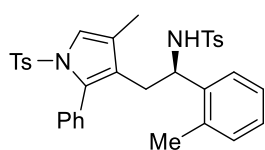

**Synthesis of chiral (*R*)-7b: General procedure D:** To an oven-dried 10 mL

Schlenk tube equipped with a stirring bar were added (*S*)-4-methyl-*N*-(1-phenylprop-2-yn-1-yl)benzenesulfonamide (*S*)-**1b** (57.0 ng, 0.200 mmol),

allyl *tert*-butyl carbonate **2a** (47.4 mg, 0.299 mmol), 4-methyl-*N*-(2-methylbenzylidene) benzenesulfonamide **3b** (27.3 mg, 0.0999 mmol), Pd(PPh<sub>3</sub>)<sub>4</sub> (11.6 mg, 0.0100 mmol, 10 mol%), **A2** (5.6 mg, 0.040 mmol, 40 mol%) and 4 Å MS (40 mg). The tube was capped, evacuated and back-filled with argon for five times. Then degassed dry toluene (1.0 mL) was added via syringe. The mixture was stirred at 80 °C for 96 h, and monitored by TLC (EtOAc/petroleum ether = 1/5). After completion, the mixture was directly purified by flash chromatography on silica gel (EtOAc/petroleum ether = 1/5) to give chiral product (*R*)-**7b**: 42.7 mg (0.0713 mmol), as a light yellow solid, 71% yield; >95:5 rr;  $[\alpha]_D^{25} = -18.9$  ( $c = 1.92$  in CHCl<sub>3</sub>); 95% ee, determined by HPLC analysis (Daicel chiralpak AD-H, *n*-hexane/*i*-PrOH = 80/20, flow rate = 1.0 mL/min,  $l = 254$  nm)  $t_R = 16.89$  min (major),  $t_R = 20.87$  min (minor).

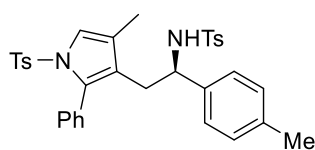

**Synthesis of chiral (*R*)-7d: General procedure D:** To an oven-dried 10

mL Schlenk tube equipped with a stirring bar were added (*S*)-4-methyl-*N*-(1-phenylprop-2-yn-1-yl)benzenesulfonamide (*S*)-**1b** (57.0 ng, 0.200

mmol), allyl *tert*-butyl carbonate **2a** (47.4 mg, 0.299 mmol), 4-methyl-*N*-(4-methylbenzylidene) benzenesulfonamide **3d** (27.3 mg, 0.0999 mmol), Pd(PPh<sub>3</sub>)<sub>4</sub> (11.6 mg, 0.0100 mmol, 10 mol%), **A2** (5.6 mg, 0.040 mmol, 40 mol%) and 4 Å MS (40 mg). The tube was capped, evacuated and back-filled with argon for five times. Then degassed dry toluene (1.0 mL) was added via syringe. The mixture was stirred at 80 °C for 96 h, and monitored by TLC (EtOAc/petroleum ether = 1/5). After completion, the mixture was directly purified by flash chromatography on silica gel (EtOAc/petroleum ether = 1/5) to give chiral product (*R*)-**7d**: 35.2 mg (0.0588 mmol), as a white solid, 59% yield; >95:5 rr;  $[\alpha]_D^{25} = -16.9$  ( $c = 1.56$  in CHCl<sub>3</sub>); 95% ee, determined by HPLC analysis (Daicel chiralpak AD-H, *n*-hexane/*i*-PrOH = 80/20, flow rate = 1.0 mL/min,  $l = 254$  nm)  $t_R = 18.09$  min (major),  $t_R = 20.46$  min (minor).

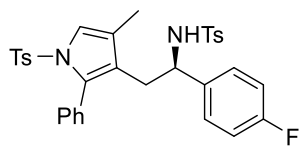

**Synthesis of chiral (*R*)-7g: General procedure D:** To an oven-dried 10

mL Schlenk tube equipped with a stirring bar were added (*S*)-4-methyl-*N*-(1-phenylprop-2-yn-1-yl)benzenesulfonamide (*S*)-**1b** (57.0 ng, 0.200



mmol), allyl *tert*-butyl carbonate **2a** (47.4 mg, 0.299 mmol), *N*-(4-fluorobenzylidene)-4-methyl benzenesulfonamide **3f** (27.7 mg, 0.0999 mmol), Pd(PPh<sub>3</sub>)<sub>4</sub> (11.6 mg, 0.0100 mmol, 10 mol%), **A2** (5.6 mg, 0.040 mmol, 40 mol%) and 4 Å MS (40 mg). The tube was capped, evacuated and back-filled with argon for five times. Then degassed dry toluene (1.0 mL) was added via syringe. The mixture was stirred at 80 °C for 96 h, and monitored by TLC (EtOAc/petroleum ether = 1/5). After completion, the mixture was directly purified by flash chromatography on silica gel (EtOAc/petroleum ether = 1/5) to give chiral product (*R*)-**7g**: 38.5 mg (0.0638 mmol), as a white solid, 64% yield; >95:5 rr; [α]<sub>D</sub><sup>25</sup> = 3.3 (*c* = 1.56 in CHCl<sub>3</sub>); 97% ee, determined by HPLC analysis (Daicel chiralpak AD-H, *n*-hexane/*i*-PrOH = 80/20, flow rate = 1.0 mL/min, λ = 254 nm) t<sub>R</sub> = 17.27 min (minor), t<sub>R</sub> = 18.98 min (major).

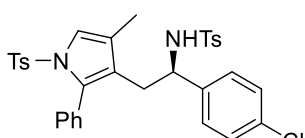

**Synthesis of chiral (*R*)-7h: General procedure D:** To an oven-dried 10 mL Schlenk tube equipped with a stirring bar were added (*S*)-4-methyl-*N*-(1-phenylprop-2-yn-1-yl)benzenesulfonamide (*S*)-**1b** (57.0 ng, 0.200

mmol), allyl *tert*-butyl carbonate **2a** (47.4 mg, 0.299 mmol), *N*-(4-chlorobenzylidene)-4-methyl benzenesulfonamide **3g** (29.3 mg, 0.0997 mmol), Pd(PPh<sub>3</sub>)<sub>4</sub> (11.6 mg, 0.0100 mmol, 10 mol%), **A2** (5.6 mg, 0.040 mmol, 40 mol%) and 4 Å MS (40 mg). The tube was capped, evacuated and back-filled with argon for five times. Then degassed dry toluene (1.0 mL) was added via syringe. The mixture was stirred at 80 °C for 96 h, and monitored by TLC (EtOAc/petroleum ether = 1/5). After completion, the mixture was directly purified by flash chromatography on silica gel (EtOAc/petroleum ether = 1/5) to give chiral product (*R*)-**7h**: 42.6 mg (0.0688 mmol), as a white solid, 69% yield; >95:5 rr; [α]<sub>D</sub><sup>25</sup> = 4.4 (*c* = 2.08 in CHCl<sub>3</sub>); 96% ee, determined by HPLC analysis (Daicel chiralpak AD-H, *n*-hexane/*i*-PrOH = 80/20, flow rate = 1.0 mL/min, λ = 254 nm) t<sub>R</sub> = 16.87 min (major), t<sub>R</sub> = 19.05 min (minor).

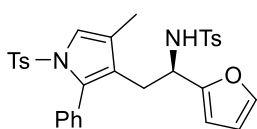

**Synthesis of chiral (*R*)-7j: General procedure D:** To an oven-dried 10 mL Schlenk tube equipped with a stirring bar were added (*S*)-4-methyl-*N*-(1-phenylprop-2-yn-1-yl)benzenesulfonamide (*S*)-**1b** (57.0 ng, 0.200 mmol), allyl

*tert*-butyl carbonate **2a** (47.4 mg, 0.299 mmol), 4-methyl-*N*-(thiophen-2-ylmethylene)benzenesulfonamide **3j** (26.5 mg, 0.0999 mmol), Pd(PPh<sub>3</sub>)<sub>4</sub> (11.6 mg, 0.0100 mmol, 10 mol%), **A2** (5.6 mg, 0.040 mmol, 40 mol%) and 4 Å MS (40 mg). The tube was capped, evacuated and back-filled with argon for five times. Then degassed dry toluene (1.0 mL) was added via syringe. The mixture was

stirred at 80 °C for 96 h, and monitored by TLC (EtOAc/petroleum ether = 1/5). After completion, the mixture was directly purified by flash chromatography on silica gel (EtOAc/petroleum ether = 1/5) to give chiral product (*R*)-**7j**: 44.2 mg (0.0770 mmol), as a white solid, 77% yield; >95:5 rr;  $[\alpha]_D^{25} = 1.0$  ( $c = 1.92$  in  $\text{CHCl}_3$ ); 96% ee, determined by HPLC analysis (Daicel chiralpak AD-H, *n*-hexane/*i*-PrOH = 80/20, flow rate = 1.0 mL/min,  $\lambda = 254$  nm)  $t_R = 16.15$  min (major),  $t_R = 19.42$  min (minor).

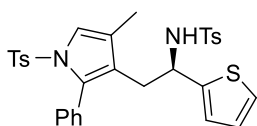

**Synthesis of chiral (*R*)-7k: General procedure D:** To an oven-dried 10 mL

Schlenk tube equipped with a stirring bar were added (*S*)-4-methyl-*N*-(1-phenylprop-2-yn-1-yl)benzenesulfonamide (*S*)-**1b** (57.0 mg, 0.200 mmol), allyl *tert*-butyl carbonate **2a** (47.4 mg, 0.299 mmol), *N*-(furan-2-ylmethylene)-4-methylbenzene sulfonamide **3i** (24.9 mg, 0.0999 mmol),  $\text{Pd}(\text{PPh}_3)_4$  (11.6 mg, 0.0100 mmol, 10 mol%), **A2** (5.6 mg, 0.040 mmol, 40 mol%) and 4 Å MS (40 mg). The tube was capped, evacuated and back-filled with argon for five times. Then degassed dry toluene (1.0 mL) was added via syringe. The mixture was stirred at 80 °C for 96 h, and monitored by TLC (EtOAc/petroleum ether = 1/5). After completion, the mixture was directly purified by flash chromatography on silica gel (EtOAc/petroleum ether = 1/5) to give chiral product (*R*)-**7k**: 35.6 mg (0.0602 mmol), as white solid, 60% yield; >95:5 rr;  $[\alpha]_D^{25} = -6.4$  ( $c = 1.57$  in  $\text{CHCl}_3$ ); 95% ee, determined by HPLC analysis (Daicel chiralpak IA, *n*-hexane/*i*-PrOH = 80/20, flow rate = 1.0 mL/min,  $\lambda = 254$  nm)  $t_R = 14.82$  min (major),  $t_R = 16.76$  min (minor).

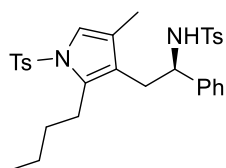

**Synthesis of chiral (*R*)-7q: General procedure D:** To an oven-dried 10 mL

Schlenk tube equipped with a stirring bar were added (*S*)-*N*-(hept-1-yn-3-yl)-4-methylbenzenesulfonamide (*S*)-**1c** (63.0 mg, 0.0200 mmol), allyl *tert*-butyl carbonate **2a** (47.4 mg, 0.299 mmol), *N*-benzylidene-4-methylbenzenesulfonamide **3a** (25.9 mg, 0.100 mmol),  $\text{Pd}(\text{PPh}_3)_4$  (11.6 mg, 0.0100 mmol, 10 mol%), **A2** (5.6 mg, 0.040 mmol, 40 mol%) and 4 Å MS (40 mg). The tube was capped, evacuated and back-filled with argon for five times. Then degassed dry toluene (1.0 mL) was added via syringe. The mixture was stirred at 80 °C for 48 h, and monitored by TLC (EtOAc/petroleum ether = 1/5). After completion, the mixture was directly purified by flash chromatography on silica gel (EtOAc/petroleum ether = 1/5) to give chiral product (*R*)-**7q**: 40.6 mg (0.0719 mmol), as yellow solid, 72% yield; >95:5 rr;  $[\alpha]_D^{25} = -5.6$  ( $c = 0.61$  in  $\text{CHCl}_3$ ); 90% ee, determined by HPLC analysis (Daicel chiralpak IA, *n*-hexane/*i*-PrOH = 80/20, flow rate = 1.0 mL/min,  $\lambda = 254$  nm)  $t_R = 9.89$  min (minor),  $t_R = 11.15$  min (major).

(major).

## 8.2 Asymmetric synthesis of (*S*)-7a from (*R*)-5b

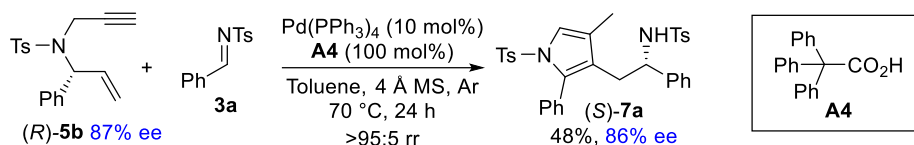

To a 10 mL Schlenk tube equipped with a stirring bar were added (*R*)-4-methyl-*N*-(1-phenyl allyl)-*N*-(prop-2-yn-1-yl)benzenesulfonamide (*R*)-5b (65.0 mg, 0.200 mmol), *N*-benzylidene-4-methyl benzenesulfonamide 3a (25.9 mg, 0.100 mmol), Pd(PPh<sub>3</sub>)<sub>4</sub> (11.6 mg, 0.0100 mmol, 10 mol%), A4 (28.8 mg, 0.0999 mmol, 100 mol%) and 4 Å MS (40 mg). The tube was capped, evacuated and back-filled with argon for five times. Then degassed dry toluene (1.0 mL) was added via syringe. The mixture was stirred at 70 °C for 12 h, and monitored by TLC (EtOAc/petroleum ether = 1/5). After completion, the mixture was directly purified by flash chromatography on silica gel (EtOAc/petroleum ether = 1/5) to give chiral product (*S*)-7a: 28.2 mg (0.0482 mmol), as white solid, 48% yield; >95:5 rr; [α]<sub>D</sub><sup>25</sup> = -19.3 (*c* = 0.43 in CHCl<sub>3</sub>); 86% ee, determined by HPLC analysis (Daicel chiralpak AD-H, *n*-hexane/*i*-PrOH = 80/20, flow rate = 1.0 mL/min, λ = 254 nm) *t*<sub>R</sub> = 18.25 min (major), *t*<sub>R</sub> = 20.65 min (minor).

## 8.3 Asymmetric synthesis of chiral 8 from (*R*)-5b

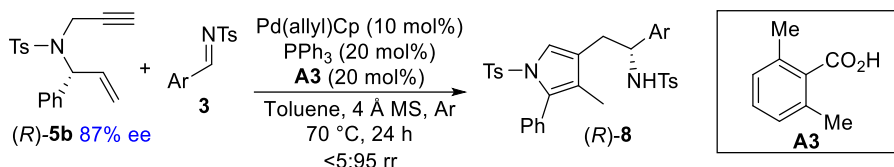

**General procedure C:** To an oven-dried 10 mL Schlenk tube equipped with a stirring bar were added (*R*)-4-methyl-*N*-(1-phenylallyl)-*N*-(prop-2-yn-1-yl)benzenesulfonamide (*R*)-5b (65.0 mg, 0.200 mmol), aldimine 3 (0.100 mmol), Pd(allyl)Cp (2.1 mg, 0.0099 mmol, 10 mol%), PPh<sub>3</sub> (5.2 mg, 0.020 mmol, 20 mol%), A3 (3.0 mg, 0.020 mmol, 20 mol%) and 4 Å MS (40 mg). The tube was capped, evacuated and back-filled with argon for five times. Then degassed dry toluene (1.0 mL) was added via syringe. The mixture was stirred at 70 °C for 24 h to 36 h, and monitored by TLC (EtOAc/petroleum ether = 1/5). After completion, the mixture was directly purified by flash chromatography on silica gel (EtOAc/petroleum ether = 1/6 to 1/5) to give chiral product 8.

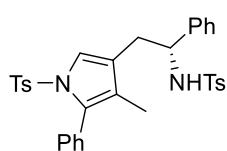

**Synthesis of chiral (R)-8a: General procedure C:** To an oven-dried 10 mL

Schlenk tube equipped with a stirring bar were added (R)-4-methyl-N-(1-phenylallyl)-N-(prop-2-yn-1-yl)benzenesulfonamide (R)-**5b** (65.0 mg, 0.200 mmol), N-benzylidene-4-methylbenzenesulfonamide **3a** (25.9 mg, 0.100 mmol), Pd(allyl)Cp (2.1 mg, 0.0099 mmol, 10 mol%), PPh<sub>3</sub> (5.2 mg, 0.020 mmol, 20 mol%), **A3** (3.0 mg, 0.020 mmol, 20 mol%) and 4 Å MS (40 mg). The tube was capped, evacuated and back-filled with argon for five times. Then degassed dry toluene (1.0 mL) was added via syringe. The mixture was stirred at 70 °C for 36 h, and monitored by TLC (EtOAc/petroleum ether = 1/5). After completion, the mixture was directly purified by flash chromatography on silica gel (EtOAc/petroleum ether = 1/6 to 1/5) to give chiral product (R)-**8a**: 43.2 mg (0.0739 mmol), as a white solid, 74% yield; 5:95 rr;  $[\alpha]_D^{25} = 13.0$  ( $c = 0.68$  in CHCl<sub>3</sub>); 68% ee, determined by HPLC analysis (Daicel chiralpak AD-H, *n*-hexane/*i*-PrOH = 80/20, flow rate = 1.0 mL/min,  $\lambda = 254$  nm)  $t_R = 14.21$  min (minor),  $t_R = 16.46$  min (major).

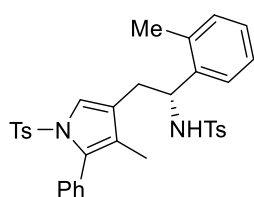

**Synthesis of chiral (R)-8b: General procedure C:** To an oven-dried 10 mL

Schlenk tube equipped with a stirring bar were added (R)-4-methyl-N-(1-(4-methylphenyl)allyl)-N-(prop-2-yn-1-yl)benzenesulfonamide (R)-**5b** (65.0 mg, 0.200 mmol), 4-methyl-N-(2-methylbenzylidene)benzenesulfonamide **3b** (27.3 mg, 0.0999 mmol), Pd(allyl)Cp (2.1 mg, 0.0099 mmol, 10 mol%), PPh<sub>3</sub> (5.2 mg, 0.020 mmol, 20 mol%), **A3** (3.0 mg, 0.020 mmol, 20 mol%) and 4 Å MS (40 mg). The tube was capped, evacuated and back-filled with argon for five times. Then degassed dry toluene (1.0 mL) was added via syringe. The mixture was stirred at 70 °C for 36 h, and monitored by TLC (EtOAc/petroleum ether = 1/5). After completion, the mixture was directly purified by flash chromatography on silica gel (EtOAc/petroleum ether = 1/6 to 1/5) to give chiral product (R)-**8b**: 46.6 mg (0.0779 mmol), as a yellow solid, 78% yield; 5:95 rr;  $[\alpha]_D^{25} = 10.8$  ( $c = 2.15$  in CHCl<sub>3</sub>); 80% ee, determined by HPLC analysis (Daicel chiralpak IE, *n*-hexane/*i*-PrOH = 60/40, flow rate = 1.0 mL/min,  $\lambda = 254$  nm)  $t_R = 19.45$  min (major),  $t_R = 21.79$  min (minor).

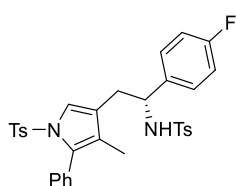

**Synthesis of chiral (R)-8g: General procedure C:** To an oven-dried 10 mL

Schlenk tube equipped with a stirring bar were added (R)-4-methyl-N-(1-(4-fluorophenyl)allyl)-N-(prop-2-yn-1-yl)benzenesulfonamide (R)-**5b** (65.0 mg, 0.200 mmol), N-(4-fluorobenzylidene)-4-methylbenzenesulfonamide **3f** (27.7 mg, 0.0999 mmol), Pd(allyl)Cp (2.1 mg, 0.0099 mmol, 10 mol%), PPh<sub>3</sub> (5.2 mg, 0.020 mmol, 20 mol%),

**A3** (3.0 mg, 0.020 mmol, 20 mol%) and 4 Å MS (40 mg). The tube was capped, evacuated and back-filled with argon for five times. Then degassed dry toluene (1.0 mL) was added via syringe. The mixture was stirred at 70 °C for 24 h, and monitored by TLC (EtOAc/petroleum ether = 1/5). After completion, the mixture was directly purified by flash chromatography on silica gel (EtOAc/petroleum ether = 1/6 to 1/5) to give chiral product (*R*)-**8g**: 44.8 mg (0.0743mmol), as a yellow solid, 74% yield; <5:95 rr;  $[\alpha]_D^{25} = 22.6$  ( $c = 2.85$  in  $\text{CHCl}_3$ ); 74% ee, determined by HPLC analysis (Daicel chiralpak IE, *n*-hexane/*i*-PrOH = 80/20, flow rate = 1.0 mL/min,  $\lambda = 254$  nm)  $t_R = 51.97$  min (major),  $t_R = 59.34$  min (minor).

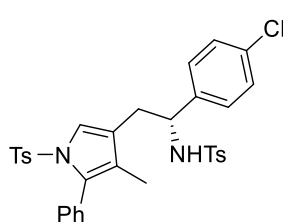

**Synthesis of chiral (*R*)-8h: General procedure C:** To an oven-dried 10 mL Schlenk tube equipped with a stirring bar were added (*R*)-4-methyl-*N*-(1-phenylallyl)-*N*-(prop-2-yn-1-yl)benzenesulfonamide (*R*)-**5b** (65.0 mg, 0.200 mmol), *N*-(4-chlorobenzylidene)-4-methylbenzenesulfonamide **3g** (29.3 mg,

0.0997 mmol), Pd(allyl)Cp (2.1 mg, 0.0099 mmol, 10 mol%),  $\text{PPh}_3$  (5.2 mg, 0.020 mmol, 20 mol%), **A3** (3.0 mg, 0.020 mmol, 20 mol%) and 4 Å MS (40 mg). The tube was capped, evacuated and back-filled with argon for five times. Then degassed dry toluene (1.0 mL) was added via syringe. The mixture was stirred at 70 °C for 24 h, and monitored by TLC (EtOAc/petroleum ether = 1/5). After completion, the mixture was directly purified by flash chromatography on silica gel (EtOAc/petroleum ether = 1/6 to 1/5) to give chiral product (*R*)-**8h**: 46.6 mg (0.0753mmol), as a yellow solid, 75% yield; <5:95 rr;  $[\alpha]_D^{25} = 20.4$  ( $c = 2.30$  in  $\text{CHCl}_3$ ); 78% ee, determined by HPLC analysis (Daicel chiralpak IE, *n*-hexane/*i*-PrOH = 60/40, flow rate = 1.0 mL/min,  $\lambda = 254$  nm)  $t_R = 16.23$  min (major),  $t_R = 18.54$  min (minor).

## 9. Exploration of other substrates

### 9.1 Exploration of more 1,6-enynes

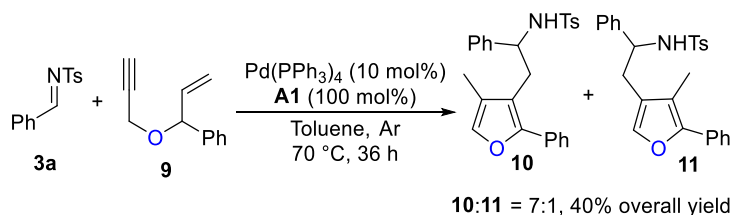

**Synthesis of 10 and 11:** To an oven-dried 10 mL Schlenk tube equipped with a stirring bar were added *N*-benzylidene-4-methylbenzenesulfonamide **3a** (25.9 mg, 0.100 mmol), 3-(prop-2-yn-1-

ylxy)prop-1-ene **9** (34.4 mg, 0.200 mmol), Pd(PPh<sub>3</sub>)<sub>4</sub> (11.6 mg, 0.0100 mmol, 10 mol%), **A1** (12.2 mg, 0.100 mmol, 100 mol%). The tube was capped, evacuated and back-filled with argon for five times. Then degassed dry toluene (1.0 mL) was added via syringe. The mixture was stirred at 70 °C for 36 h, and monitored by TLC (EtOAc/petroleum ether = 1/5). After completion, the mixture was directly purified by flash chromatography on silica gel (EtOAc/petroleum ether = 1/6 to 1/5) to give products **10** and **11** as inseparable regioselective isomers: 17.2 mg (0.0399 mmol), as a colorless oil, 40% yield; **10:11** = 7:1; for **10**: <sup>1</sup>H NMR (400 MHz, CDCl<sub>3</sub>): δ (ppm) 7.46–7.39 (m, 4H), 7.39–7.34 (m, 2H), 7.31–7.27 (m, 1H), 7.17–7.12 (m, 3H), 7.10–7.05 (m, 3H), 7.04–6.99 (m, 2H), 4.95–4.79 (m, 1H), 4.37 (dt, *J* = 7.4, 6.0 Hz, 1H), 3.13 (dd, *J* = 14.4, 7.6 Hz, 1H), 2.93 (dd, *J* = 14.4, 7.4 Hz, 1H), 2.35 (s, 3H), 1.68 (s, 3H); <sup>13</sup>C NMR (100 MHz, CDCl<sub>3</sub>): δ (ppm) 150.4, 143.1, 140.6, 138.3, 136.8, 131.2, 129.3, 128.7, 128.4, 127.6, 127.4, 127.0, 126.5, 125.8, 122.0, 116.3, 57.8, 32.9, 21.5, 8.3; HRMS (ESI-TOF) *m/z*: [M + Na]<sup>+</sup> Calcd for C<sub>26</sub>H<sub>25</sub>NO<sub>3</sub>SNa<sup>+</sup> 454.1447; Found 454.1449.

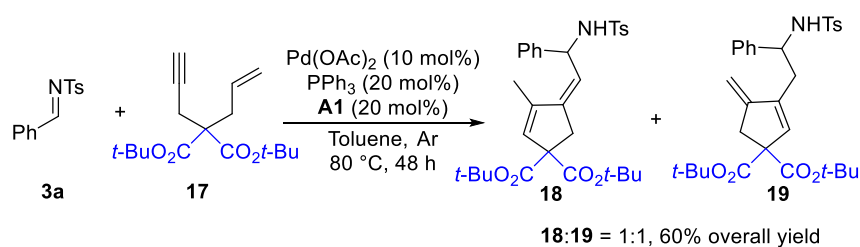

**Synthesis of 18 and 19:** To an oven-dried 10 mL Schlenk tube equipped with a stirring bar were added *N*-benzylidene-4-methylbenzenesulfonamide **3a** (25.9 mg, 0.100 mmol), di-*tert*-butyl 2-allyl-2-(prop-2-yn-1-yl)malonate **17** (58.8 mg, 0.200 mmol), Pd(OAc)<sub>2</sub> (2.2 mg, 0.0098 mmol, 10 mol%), PPh<sub>3</sub> (5.2 mg, 0.020 mmol, 20 mol%), **A1** (2.4 mg, 0.020 mmol, 20 mol%). The tube was capped, evacuated and back-filled with argon for five times. Then degassed dry toluene (1.0 mL) was added via syringe. The mixture was stirred at 80 °C for 48 h, and monitored by TLC (EtOAc/petroleum ether = 1/5). After completion, the mixture was directly purified by flash chromatography on silica gel (EtOAc/petroleum ether = 1/8 to 1/5) to give products **18** and **19** as inseparable isomers: 34.2 mg (0.0617 mmol), as a colorless oil, 62% total yield; **18:19** = 1:1; <sup>1</sup>H NMR (400 MHz, CDCl<sub>3</sub>): δ (ppm) 7.64 (d, *J* = 8.2 Hz, 2H), 7.55 (d, *J* = 8.2 Hz, 2H), 7.26 (d, *J* = 4.2 Hz, 4H), 7.22–7.11 (m, 8H), 7.08–6.99 (m, 2H), 5.81 (s, 1H), 5.75 (s, 1H), 5.13 (dd, *J* = 9.4, 6.0 Hz, 1H), 5.06–4.96 (m, 2H), 4.90 (d, *J* = 6.5 Hz, 1H), 4.80–4.71 (m, 2H), 4.44 (dt, *J* = 7.2, 5.8 Hz, 1H), 3.15–2.99 (m, 2H), 2.98–2.84 (m, 2H), 2.68 (dd, *J* = 14.6, 7.2 Hz, 1H), 2.59 (dd, *J* = 14.8, 7.0 Hz, 1H), 2.37 (s, 3H), 2.36 (s, 3H), 1.54–1.49 (m, 12H), 1.43 (s, 9H), 1.41 (s, 9H), 1.39 (s, 9H); <sup>13</sup>C NMR (100 MHz, CDCl<sub>3</sub>): δ (ppm) 169.69,

169.66, 169.62, 169.2, 149.9, 146.5, 143.09, 143.07, 142.5, 140.4, 137.9, 137.1, 134.9, 132.4, 129.4, 129.3, 128.7, 128.4, 127.8, 127.5, 127.4, 127.3, 126.8, 126.6, 118.4, 103.9, 81.84, 81.76, 81.72, 81.70, 65.2, 65.0, 57.3, 56.2, 37.4, 35.4, 34.7, 27.9, 27.83, 27.82, 27.81, 21.4, 12.3; HRMS (ESI-TOF)  $m/z$ :  $[M + Na]^+$  Calcd for  $C_{31}H_{39}NO_6SNa^+$  576.2390; Found 576.2387.

## 9.2 Unsuccessful substrates attempts

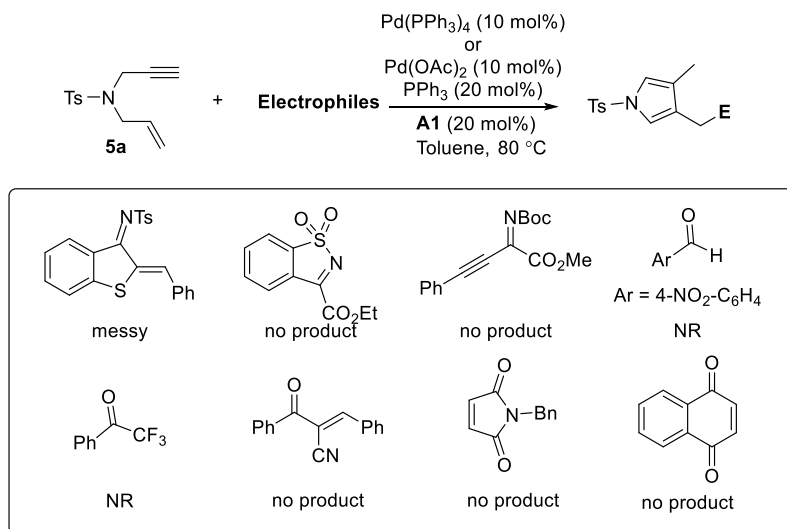

More types of activated ketimine, aldehyde, ketone and Michael acceptors were employed to react with **5a** under the optimal condition. Unfortunately, complex reaction profiles or no obvious conversions were generally observed as outlined above.

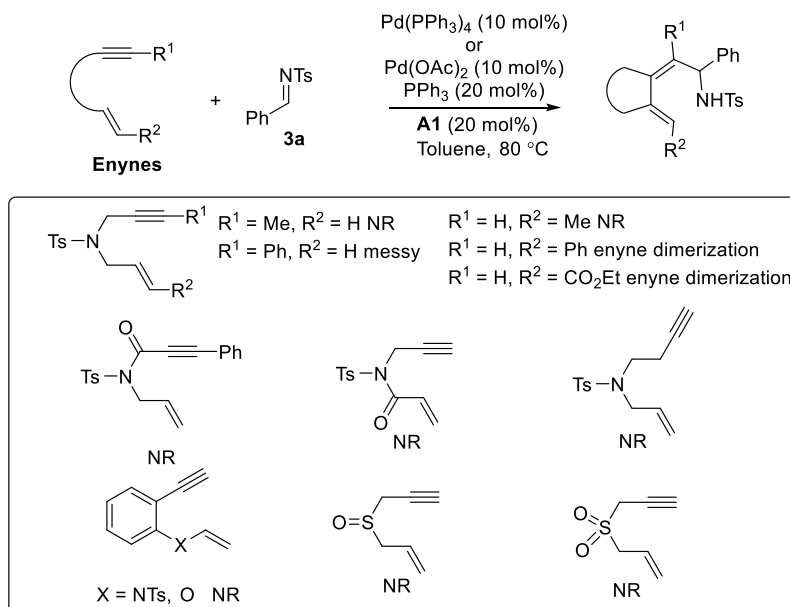

On the other hand, the above outlined enynes (bearing different substituents or linkers) were generally inert to the reaction with **3a**.

## 10. Synthetic transformations

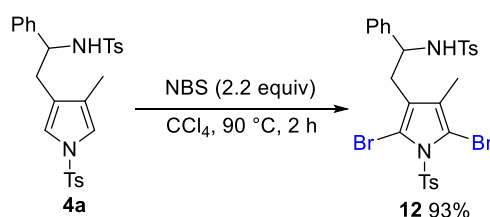

**Synthesis of 12:** To a 10 mL tube equipped with a stirring bar were added **4a** (30.6 mg, 0.0602 mmol), N-Bromosuccinimide (23.5 mg, 0.132 mmol) and  $\text{CCl}_4$  (0.5 mL). The mixture was stirred at  $90^\circ\text{C}$  for 2 h, and monitored by TLC (EtOAc/petroleum ether = 1/10). After completion, the mixture was directly purified by flash chromatography on silica gel (EtOAc/petroleum ether = 1/6 to 1/5) to give product **12**: 37.2 mg (0.0558 mmol), as a white solid, 93% yield; mp  $69\text{--}71^\circ\text{C}$ ;  $^1\text{H}$  NMR (400 MHz,  $\text{CDCl}_3$ ):  $\delta$  (ppm) 7.76 (d,  $J = 8.4$  Hz, 2H), 7.39 (d,  $J = 8.4$  Hz, 2H), 7.25 (d,  $J = 8.0$  Hz, 2H), 7.17–7.11 (m, 3H), 7.08 (d,  $J = 8.0$  Hz, 2H), 7.06–7.00 (m, 2H), 4.95–4.82 (m, 1H), 4.30–4.17 (m, 1H), 2.69 (dd,  $J = 14.4, 9.2$  Hz, 1H), 2.53 (dd,  $J = 14.4, 5.8$  Hz, 1H), 2.35 (s, 3H), 2.35 (s, 3H), 1.52 (s, 3H);  $^{13}\text{C}$  NMR (100 MHz,  $\text{CDCl}_3$ ):  $\delta$  (ppm) 145.7, 143.6, 140.8, 136.6, 135.4, 130.0, 129.5, 128.6, 127.7, 127.6, 126.7, 126.2, 125.9, 125.8, 102.2, 101.9, 57.4, 34.7, 21.73, 21.67, 11.2; HRMS (ESI-TOF)  $m/z$ :  $[\text{M} + \text{Na}]^+$  Calcd for  $\text{C}_{27}\text{H}_{26}^{79}\text{Br}_2\text{N}_2\text{O}_4\text{S}_2\text{Na}^+$  686.9593; Found 686.9686; Calcd for  $\text{C}_{27}\text{H}_{26}^{79}\text{Br}^{81}\text{Br} \text{N}_2\text{O}_4\text{S}_2\text{Na}^+$  688.9573; Found 688.9568; Calcd for  $\text{C}_{27}\text{H}_{26}^{81}\text{Br}_2 \text{N}_2\text{O}_4\text{S}_2\text{Na}^+$  690.9552; Found 690.9548.

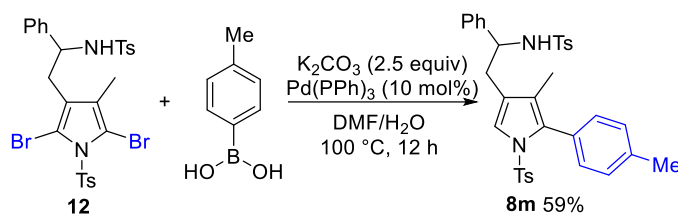

**Synthesis of 8m:** To an oven-dried 10 mL Schlenk tube equipped with a stirring bar were added *N*-(2-(2,5-dibromo-4-methyl-1-tosyl-1*H*-pyrrol-3-yl)-1-phenylethyl)-4-methylbenzenesulfonamide **12** (39.8 mg, 0.600 mmol), 4-tolylboronic acid (17.9 mg, 0.132 mmol), potassium carbonate (20.7 mg, 0.150 mmol) and  $\text{Pd}(\text{PPh}_3)_4$  (6.9 mg, 0.0060 mmol, 10 mol%). The tube was capped, evacuated and back-filled with argon for five times. Then degassed DMF (0.3 mL) and  $\text{H}_2\text{O}$  (0.2 mL) were added via syringe. The mixture was stirred at  $100^\circ\text{C}$  for 12 h, and monitored by TLC (EtOAc/petroleum ether = 1/5). After completion, the reaction was cooled down to room temperature, and diluted with  $\text{H}_2\text{O}$  (3.0 mL) and extracted with EtOAc (3.0 mL  $\times$  3). The combined organic layers





**Synthesis of 14:** To a stirred solution of **7a** (35.0 mg, 0.0599 mmol) in MeCN (0.6 mL) was added N-Bromosuccinimide (12.8 mg, 0.719 mmol). The mixture was stirred at room temperature for 3 h. After completion (monitored by TLC), the solvent was concentrated in vacuo. The residue was purified by flash chromatography on silica gel (EtOAc/petroleum ether = 1/5) to give product **14**: 18.9 mg (0.0285 mmol), as a white solid, 48% yield; mp 75–76 °C; <sup>1</sup>H NMR (400 MHz, CDCl<sub>3</sub>): δ (ppm) 7.48–7.33 (m, 4H), 7.34–7.28 (m, 1H), 7.27–7.19 (m, 2H), 7.23–7.11 (m, 4H), 7.14–7.03 (m, 5H), 6.82 (d, *J* = 6.8 Hz, 2H), 6.45 (brs, 1H), 4.74 (d, *J* = 6.2 Hz, 1H), 4.32–4.04 (m, 3H), 2.76–2.59 (m, 2H), 2.41 (s, 3H), 2.37 (s, 3H); <sup>13</sup>C NMR (100 MHz, CDCl<sub>3</sub>): δ (ppm) 145.0, 143.3, 140.7, 137.1, 135.2, 133.4, 129.7, 129.5, 129.4, 129.1, 128.9, 128.4, 127.8, 127.4, 127.3, 127.0, 126.2, 122.07, 122.05, 121.8, 57.6, 33.1, 24.7, 21.6, 21.5; HRMS (ESI-TOF) *m/z*: [M + Na]<sup>+</sup> Calcd for C<sub>33</sub>H<sub>31</sub><sup>79</sup>BrN<sub>2</sub>O<sub>4</sub>S<sub>2</sub>Na<sup>+</sup> 685.0801; Found 685.0798; Calcd for C<sub>33</sub>H<sub>31</sub><sup>81</sup>BrN<sub>2</sub>O<sub>4</sub>S<sub>2</sub>Na<sup>+</sup> 687.0780; Found 687.0780.

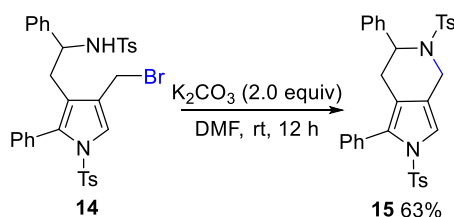

**Synthesis of 15:** To a stirred solution of **14** (39.8 mg, 0.0600 mmol) in DMF (1.2 mL) was added potassium carbonate (16.6 mg, 0.120 mmol), the mixture was stirred at room temperature for 12 h. After completion (monitored by TLC), the mixture was quenched with water and extracted with EtOAc (3.0 mL × 3). The combined organic layers were washed with brine (3.0 mL × 2), dried over Na<sub>2</sub>SO<sub>4</sub>, filtrated, and concentrated in vacuo. The residue was purified by flash chromatography on silica gel (EtOAc/petroleum ether = 1/5) to give product **15**: 22.0 mg (0.0378 mmol), as a white solid, 63% yield; mp 74–86 °C; <sup>1</sup>H NMR (400 MHz, CDCl<sub>3</sub>): δ (ppm) 7.65–7.54 (m, 2H), 7.37–7.27 (m, 4H), 7.23–7.10 (m, 8H), 7.10–7.01 (m, 4H), 6.95 (s, 1H), 6.93 (s, 1H), 5.33 (d, *J* = 6.2 Hz, 1H), 4.79 (d, *J* = 16.6 Hz, 1H), 3.84 (d, *J* = 16.6 Hz, 1H), 2.57 (d, *J* = 1.6 Hz, 1H), 2.49 (dd, *J* = 16.8, 6.4 Hz, 1H), 2.42 (s, 3H), 2.36 (s, 3H); <sup>13</sup>C NMR (100 MHz, CDCl<sub>3</sub>): δ (ppm) 144.7, 143.1, 138.3, 137.7, 135.8, 131., 130.3, 129.9, 129.4, 128.4, 127.6, 127.5, 127.24, 127.18, 120.8, 118.9, 116.7, 53.8, 38.7, 23.6, 21.7, 21.4.; HRMS (ESI-TOF) *m/z*: [M + Na]<sup>+</sup> Calcd for C<sub>33</sub>H<sub>30</sub>N<sub>2</sub>O<sub>4</sub>S<sub>2</sub>Na<sup>+</sup> 605.1539; Found 605.1549.

## 11. Mechanism and regiodivergence studies

### 11.1 Elucidation of the process of tandem reaction

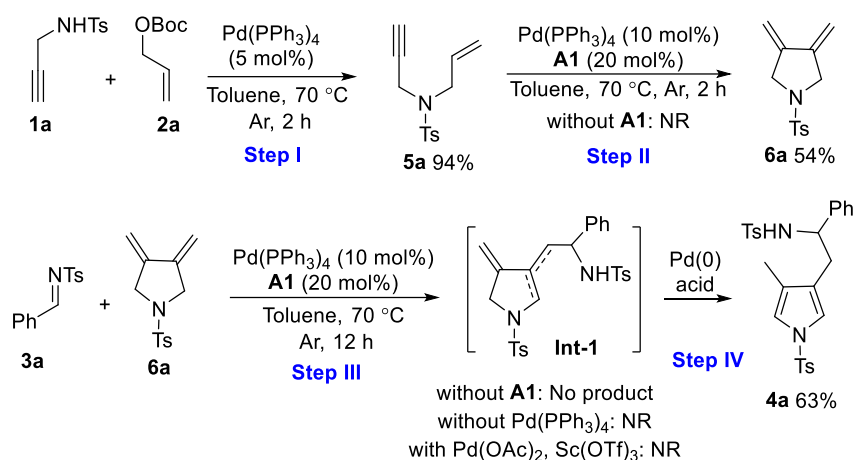

**Step I:** To an oven-dried 10 mL Schlenk tube equipped with a stirring bar were added 4-methyl-*N*-(prop-2-yn-1-yl)benzenesulfonamide **1a** (21.0 mg, 0.100 mmol), allyl *tert*-butyl carbonate **2a** (15.8 mg, 0.0999 mmol) and Pd(PPh<sub>3</sub>)<sub>4</sub> (5.8 mg, 0.0050 mmol, 5 mol%). The tube was capped, evacuated and back-filled with argon for five times. Then degassed dry toluene (0.5 mL) was added via syringe. The mixture was stirred at 70 °C for 2 h, and monitored by TLC (EtOAc/petroleum ether = 1/10). After completion, the mixture was directly purified by flash chromatography on silica gel (EtOAc/petroleum ether = 1/20) to give *N*-allyl-4-methyl-*N*-(prop-2-yn-1-yl)benzenesulfonamide **5a**: 23.4 mg (0.0938 mmol), as a white solid, 94% yield.

**Step II:** To an oven-dried 10 mL Schlenk tube equipped with a stirring bar were added *N*-allyl-4-methyl-*N*-(prop-2-yn-1-yl)benzenesulfonamide **5a** (24.9 mg, 0.0999 mmol), Pd(PPh<sub>3</sub>)<sub>4</sub> (5.8 mg, 0.0050 mmol, 5 mol%) and **A1** (2.4 mg, 0.0197 mmol 20 mol%). The tube was capped, evacuated and back-filled with argon for five times. Then degassed dry toluene (0.5 mL) was added via syringe. The mixture was stirred at 70 °C for 2 h, and monitored by TLC (EtOAc/petroleum ether = 1/10). After completion, the mixture was directly purified by flash chromatography on silica gel (EtOAc/petroleum ether = 1/20) to give 3,4-dimethylene-1-tosylpyrrolidine **6a**: 13.5 mg (0.0542 mmol), as a white solid, 54% yield. The NMR spectra were consistent with the literature report (*Nat. Prod. Rep.* **2010**, 27, 1801).

*Notably, no reaction was observed in the absence of A1, which indicated that acid was crucial for the cycloisomerization of enyne.*

**Step III and Step IV:** To an oven-dried 10 mL Schlenk tube equipped with a stirring bar were added *N*-benzylidene-4-methylbenzenesulfonamide **3a** (13.0 mg, 0.0501 mmol) 3,4-dimethylene-1-tosylpyrrolidine **6a** (14.9, 0.0598 mmol), Pd(PPh<sub>3</sub>)<sub>4</sub> (5.8 mg, 0.0050 mmol, 5 mol%) and **A1** (2.4 mg, 0.0197 mmol 20 mol%). The tube was capped, evacuated and back-filled with argon for five times. Then degassed dry toluene (0.5 mL) was added via syringe. The mixture was stirred at 70 °C for 12 h, and monitored by TLC (EtOAc/petroleum ether = 1/5). After completion, the mixture was directly purified by flash chromatography on silica gel (EtOAc/petroleum ether = 1/5) to give product **4a**: 16.1 mg (0.0317 mmol), as a white solid, 63% yield.

Both **3a** and **6a** were consumed completely, but no product **4a** was detected without **A1**. No obvious conversion was observed without Pd(PPh<sub>3</sub>)<sub>4</sub>. *These results demonstrated that both palladium and acid are crucial in the vinylogous addition and aromatization steps.*

*Other Lewis acid, such as Pd(OAc)<sub>2</sub>, Sc(OTf)<sub>3</sub> could not promote the transformation, which indicated the mechanism would not involve an Alder-ene type process.*

## 11.2 Rationale for regioselective 3-pyrrolylmethylation

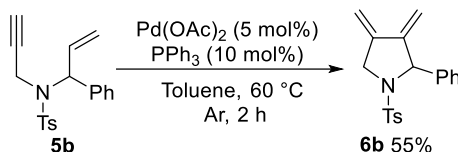

**Synthesis of 6b:** To an oven-dried 100 mL Schlenk tube equipped with a stirring bar were added 4-methyl-*N*-(1-phenylallyl)-*N*-(prop-2-yn-1-yl)benzenesulfonamide **5b** (488.1 mg, 1.500 mmol), Pd(OAc)<sub>2</sub> (16.8 mg, 0.0748 mmol, 5 mol%) and PPh<sub>3</sub> (39.0 mg, 0.149 mmol, 10 mol%). The tube was capped, evacuated and back-filled with argon for five times. Then degassed dry toluene (15.0 mL) was added via syringe. The mixture was stirred at 60 °C for 2 h, and monitored by TLC (EtOAc/petroleum ether = 1/10). After completion, the mixture was directly purified by flash chromatography on silica gel (EtOAc/petroleum ether = 1/20) to give 3,4-dimethylene-2-phenyl-1-tosylpyrrolidine **6b**: 268.5 mg (0.8249 mmol), as a white solid, 55% yield, mp 93–94 °C; <sup>1</sup>H NMR (400 MHz, CDCl<sub>3</sub>): δ (ppm) 7.52 (d, *J* = 8.2 Hz, 2H), 7.29–7.24 (m, 5H), 7.19 (d, *J* = 8.0 Hz, 2H), 5.54–5.33 (m, 2H), 5.23 (s, 1H), 5.00 (s, 1H), 4.71 (s, 1H), 4.34–4.17 (m, 2H), 2.39 (s, 3H); <sup>13</sup>C NMR (100 MHz, CDCl<sub>3</sub>): δ (ppm) 146.8, 143.4, 141.3, 141.1, 134.7, 129.4, 128.4, 127.7, 127.6, 127.4, 108.2, 105.9, 67.9, 52.8, 21.5; HRMS (ESI-TOF) *m/z*: [M + Na]<sup>+</sup> Calcd for C<sub>19</sub>H<sub>19</sub>NO<sub>2</sub>SN<sup>+</sup> 348.1029 Found 348.1036.

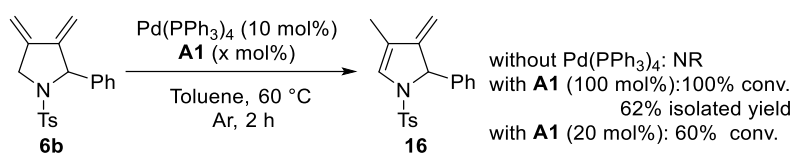

**Isomerization of 6b to 16:** To an oven-dried 50 mL Schlenk tube equipped with a stirring bar were added 3,4-dimethylene-2-phenyl-1-tosylpyrrolidine **6b** (162.7 mg, 0.5000 mmol), Pd(PPh<sub>3</sub>)<sub>4</sub> (28.9 mg, 0.0248 mmol, 5 mol%), and **A1** (12.2 mg, 0.0998 mmol, 100 mol%). The tube was capped, evacuated and back-filled with argon for five times. Then degassed dry toluene (5.0 mL) was added via syringe. The mixture was stirred at 60 °C for 2 h, and monitored by <sup>1</sup>H-NMR analysis. After completion, the mixture was directly purified by flash chromatography on silica gel (EtOAc/petroleum ether = 1/20) to give **16**: 100.8 mg (0.3097 mmol), as a white solid, 62% yield, mp 138–139 °C; <sup>1</sup>H NMR (400 MHz, CDCl<sub>3</sub>): δ (ppm) 7.58 (d, *J* = 8.2 Hz, 2H), 7.33–7.20 (m, 7H), 6.73 (s, 1H), 5.05 (d, *J* = 3.0 Hz, 1H), 4.65 (d, *J* = 3.0 Hz, 1H), 4.38 (t, *J* = 2.2 Hz, 1H), 2.41 (s, 3H), 1.73 (d, *J* = 1.4 Hz, 3H); <sup>13</sup>C NMR (100 MHz, CDCl<sub>3</sub>): δ (ppm) 153.2, 143.8, 140.7, 133.9, 132.5, 129.7, 128.5, 127.9, 127.6, 127.3, 121.6, 101.3, 67.9, 21.6, 9.6; HRMS (ESI-TOF) *m/z*: [M + Na]<sup>+</sup> Calcd for C<sub>19</sub>H<sub>19</sub>NO<sub>2</sub>SNa<sup>+</sup> 348.1029; Found 348.1036

About 60% conversion was determined by <sup>1</sup>H-NMR analysis in the presence of **A1** (20 mol%) in 2 h. *These results clearly demonstrated that increasing the loadings of acid additive could facilitate the isomerization of 6b to 16.*

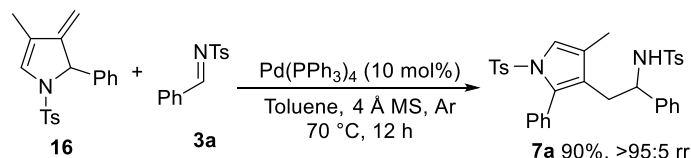

**Synthesis of 7a from the reaction of 16 and 3a:** To an oven-dried 10 mL Schlenk tube equipped with a stirring bar were added 4-methyl-3-methylene-2-phenyl-1-tosyl-2,3-dihydro-1*H*-pyrrole **16** (39.0 mg, 0.120 mmol), *N*-benzylidene-4-methyl benzenesulfonamide **3a** (25.9 mg, 0.100 mmol), Pd(PPh<sub>3</sub>)<sub>4</sub> (11.6 mg, 0.0100 mmol, 10 mol%) and 4 Å MS (40 mg). The tube was capped, evacuated and back-filled with argon for five times. Then degassed dry toluene (1.0 mL) was added via syringe. The mixture was stirred at 70 °C for 12 h, and monitored by TLC. After completion, the mixture was directly purified by flash chromatography on silica gel (EtOAc/petroleum ether = 1/5) to give product **7a**: 52.6 mg (0.0900 mmol), as a yellow solid, 90% yield; >95:5 rr.

*In conclusion, increasing the amounts of acid additive could improve the formation of 3-pyrrolylmethylated product 7a by rapid generation of 16.*

### 11.3 Rationale for regioselective 4-pyrrolylmethylation

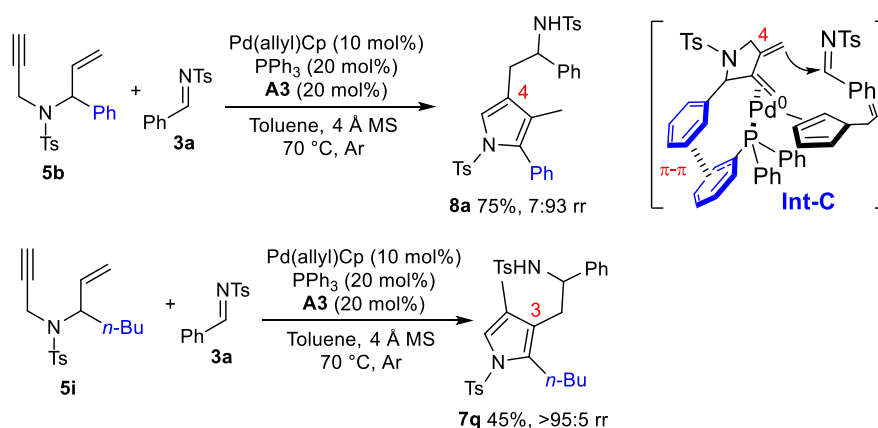

As outlined above, the reaction of *n*-butyl substituted enyne **5i** with **3a** still delivered 3-pyrrolylmethylated product **7q** exclusively under the catalysis of Pd(allyl)Cp, PPh<sub>3</sub> and acid **A3**, but using phenyl-substituted enyne **5b** gave 4-pyrrolylmethylated product **8a** exclusively under the same catalytic conditions. *The results indicated that a phenyl group on 5b was crucial for the formation of 4-pyrrolylmethylated 8a, probably a π-π stacking between intermediate 6b and ligand PPh<sub>3</sub>, as outlined in Int-C, might help direct and stabilize the η<sup>2</sup>-Pd<sup>0</sup>-diene complex, which would result in the generation of 4-pyrrolylmethylated 8a. Meanwhile, allyl cyclopentadiene formed in situ might also play a significant role as a ligand,*

## 12. Crystal data, ECD spectra and structural refinement

**Procedure for the recrystallization of 4a:** to a 10 mL tube containing **4a** (20 mg) was added petroleum ether (3.6 mL) and *i*-PrOH (2.4 mL). The mixture was heated until a clear solution was formed, which was kept aside overnight at room temperature to obtain crystals. The crystals were subjected for single crystal XRD to determine the structure of **4a**. The data were collected by an Agilent Gemini equipped with a Cu radiation source ( $K = 1.54184 \text{ \AA}$ ) at 296.9 K. CCDC 2184605 (**4a**) contains the supplementary crystallographic data for this paper. These data can be obtained free of charge via [www.ccdc.cam.ac.uk/data\\_request/cif](http://www.ccdc.cam.ac.uk/data_request/cif).

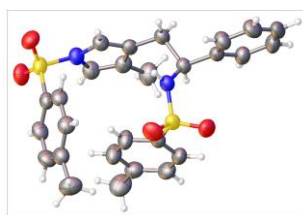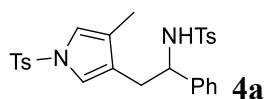

(ellipsoid contour probability 50%)

|                                             |                                                                              |
|---------------------------------------------|------------------------------------------------------------------------------|
| Identification code                         | <b>4a</b>                                                                    |
| Empirical formula                           | C <sub>27</sub> H <sub>28</sub> N <sub>2</sub> O <sub>4</sub> S <sub>2</sub> |
| Formula weight                              | 508.63                                                                       |
| Temperature/K                               | 296.87(12)                                                                   |
| Crystal system                              | monoclinic                                                                   |
| Space group                                 | P2 <sub>1</sub> /n                                                           |
| a/Å                                         | 9.4288(3)                                                                    |
| b/Å                                         | 10.4362(3)                                                                   |
| c/Å                                         | 26.2815(7)                                                                   |
| α/°                                         | 90                                                                           |
| β/°                                         | 96.065(3)                                                                    |
| γ/°                                         | 90                                                                           |
| Volume/Å <sup>3</sup>                       | 2571.67(13)                                                                  |
| Z                                           | 4                                                                            |
| ρ <sub>calc</sub> /cm <sup>3</sup>          | 1.314                                                                        |
| μ/mm <sup>-1</sup>                          | 2.169                                                                        |
| F(000)                                      | 1072.0                                                                       |
| Crystal size/mm <sup>3</sup>                | 0.5 × 0.35 × 0.1                                                             |
| Radiation                                   | CuKα (λ = 1.54184)                                                           |
| 2θ range for data collection/°              | 6.764 to 142.66                                                              |
| Index ranges                                | -11 ≤ h ≤ 11, -8 ≤ k ≤ 12, -31 ≤ l ≤ 27                                      |
| Reflections collected                       | 14349                                                                        |
| Independent reflections                     | 4931 [R <sub>int</sub> = 0.0507, R <sub>sigma</sub> = 0.0434]                |
| Data/restraints/parameters                  | 4931/0/319                                                                   |
| Goodness-of-fit on F <sup>2</sup>           | 1.021                                                                        |
| Final R indexes [I ≥ 2σ (I)]                | R <sub>1</sub> = 0.0639, wR <sub>2</sub> = 0.1703                            |
| Final R indexes [all data]                  | R <sub>1</sub> = 0.0749, wR <sub>2</sub> = 0.1898                            |
| Largest diff. peak/hole / e Å <sup>-3</sup> | 0.46/-0.29                                                                   |

**Procedure for the recrystallization of 7o:** To a 10 mL tube containing **7o** (40 mg) was added petroleum ether, EtOAc and DCM (10:3:1, about 6.0 mL). The mixture was heated until a clear

solution was formed, which was kept aside overnight at room temperature to obtain crystals. The crystals were subjected for single crystal XRD to determine the structure of **7o**. The data were collected by an Agilent Gemini equipped with a Mo radiation source ( $K = 0.71073 \text{ \AA}$ ) at 302.0 K. CCDC 2184606 (**7o**) contains the supplementary crystallographic data for this paper. These data can be obtained free of charge via [www.ccdc.cam.ac.uk/data\\_request/cif](http://www.ccdc.cam.ac.uk/data_request/cif).

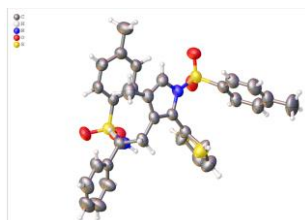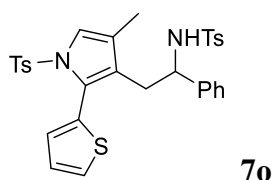

(ellipsoid contour probability 50%)

|                                               |                                                              |
|-----------------------------------------------|--------------------------------------------------------------|
| Identification code                           | <b>7o</b>                                                    |
| Empirical formula                             | $C_{31}H_{30}N_2O_4S_3$                                      |
| Formula weight                                | 590.75                                                       |
| Temperature/K                                 | 302.0                                                        |
| Crystal system                                | monoclinic                                                   |
| Space group                                   | $C2/c$                                                       |
| $a/\text{\AA}$                                | 29.5374(19)                                                  |
| $b/\text{\AA}$                                | 9.7700(5)                                                    |
| $c/\text{\AA}$                                | 24.882(3)                                                    |
| $\alpha/^\circ$                               | 90                                                           |
| $\beta/^\circ$                                | 122.932(2)                                                   |
| $\gamma/^\circ$                               | 90                                                           |
| Volume/ $\text{\AA}^3$                        | 6026.6(8)                                                    |
| Z                                             | 8                                                            |
| $\rho_{\text{calc}}/\text{cm}^3$              | 1.302                                                        |
| $\mu/\text{mm}^{-1}$                          | 0.284                                                        |
| F(000)                                        | 2480.0                                                       |
| Crystal size/ $\text{mm}^3$                   | $0.35 \times 0.28 \times 0.14$                               |
| Radiation                                     | $\text{MoK}\alpha$ ( $\lambda = 0.71073$ )                   |
| $2\theta$ range for data collection/ $^\circ$ | 3.9 to 54.992                                                |
| Index ranges                                  | $-38 \leq h \leq 38, -12 \leq k \leq 10, -32 \leq l \leq 32$ |



|                                                |                                                                  |
|------------------------------------------------|------------------------------------------------------------------|
| Reflections collected                          | 37923                                                            |
| Independent reflections                        | 6899 [ $R_{\text{int}} = 0.0619$ , $R_{\text{sigma}} = 0.0388$ ] |
| Data/restraints/parameters                     | 6899/0/378                                                       |
| Goodness-of-fit on $F^2$                       | 1.018                                                            |
| Final R indexes [ $I \geq 2\sigma(I)$ ]        | $R_1 = 0.0497$ , $wR_2 = 0.1164$                                 |
| Final R indexes [all data]                     | $R_1 = 0.0920$ , $wR_2 = 0.1404$                                 |
| Largest diff. peak/hole / $e \text{ \AA}^{-3}$ | 0.31/-0.32                                                       |

## ECD spectra and structural refinement for enantioenriched **7a** and **8b**

### Computation details

Conformational search of investigated compounds has been carried out by using Molclus software (version 1.9.9.4) together with Gaussian 09 software package.<sup>5</sup> All stable conformations obtained are then optimized using DFT at the PBE1PBE/6-31G(d) level, and the harmonic vibrational frequencies of each conformation were calculated at the same level. The self-consistent reaction field (SCRF) and SMD<sup>6</sup> solvation model was adopted to evaluate the effect of solvent (Methanol). The energy of each conformer and Boltzmann distribution was calculated. Based on the Boltzmann distribution of each conformer, the ECD of each represent conformer was calculated by TDDFT at the pbe1pbe/def2tzvp level and the weighted ECD spectrums were plotted by Multiwfn software.<sup>7</sup>

(5) L. Tian, Molclus program, Version 1.9.9.4, <http://www.keinsci.com/research/molclus.html>

(6) S. Grimme, S. Ehrlich and L. Goerigk, *J. Comput. Chem.* 2011, **32**, 1456.

(7) T. Lu, and F. Chen, *J. Comput. Chem.* 2012, **33**, 580.

### Results:

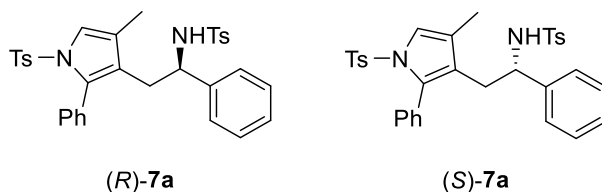

The Boltzmann distribution of molecule (*S*)-**7a** and weighted ECD spectrum were given in **Table S12.1** and **Figure S12.1** respectively. The experimental ECD spectrum of (*S*)-**7a** is opposite to the predicted ECD spectrum, which means the experimental ECD of molecule **7a** is in *R*-configuration.

**Table 12.1** The Boltzmann distribution of the investigated molecule (*S*)-**7a**.

| <i>(S)</i> -7a  | Index | DG(kcal/mol) | Q <sub>i</sub> (Relat) | Percent |
|-----------------|-------|--------------|------------------------|---------|
| S-cluster6.log  | 1     | 0            | 1                      | 59.47%  |
| S-cluster4.log  | 2     | 0.70532124   | 0.304084886            | 18.08%  |
| S-cluster8.log  | 3     | 0.96322785   | 0.196764875            | 11.70%  |
| S-cluster5.log  | 4     | 1.066767     | 0.165216222            | 9.83%   |
| S-cluster10.log | 6     | 2.88340845   | 0.007699143            | 0.46%   |
| S-cluster9.log  | 7     | 3.23544156   | 0.004250106            | 0.25%   |
| S-cluster3.log  | 8     | 3.35466846   | 0.003475407            | 0.21%   |
| S-cluster7.log  | 9     | 14.22941676  | 3.71315E-11            | 0.00%   |

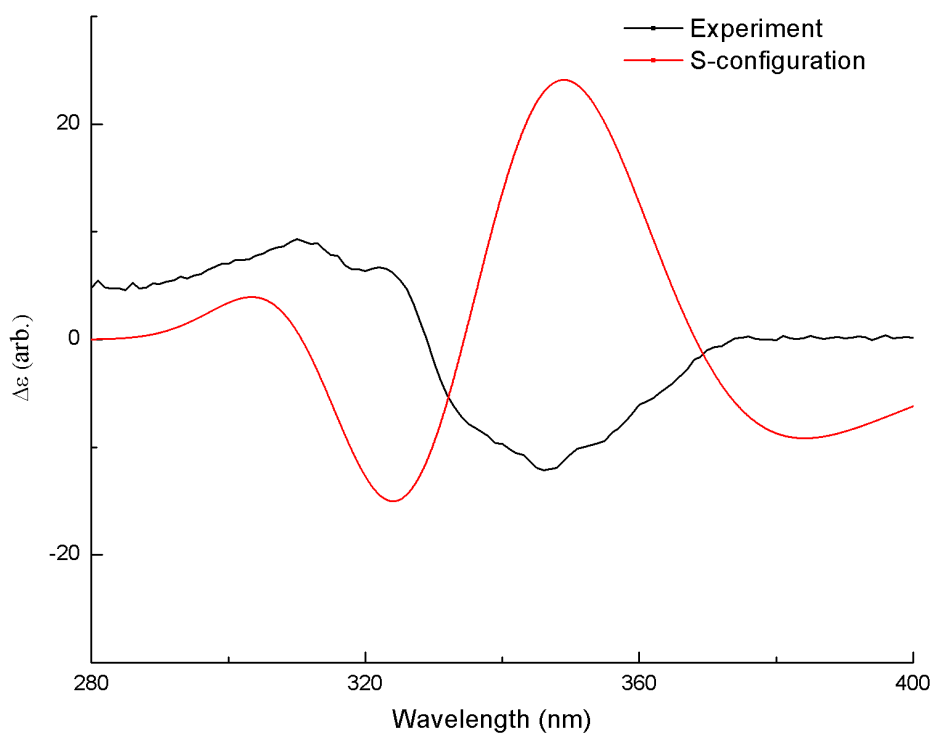

**Figure S12.1.** The experimental and predicted ECD of (*S*)-7a.

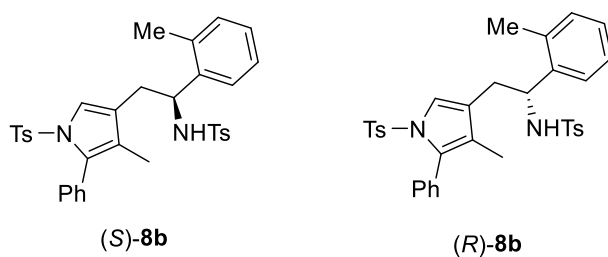

The molecule of (*S*)-8b may have different conformers in solvents and each conformer owns different ECD absorbing spectra. Hence, the ECD spectrum of experimental results is the average ECD spectrum of each conformer.

Conformational search shows that (*S*)-8b have 9 different conformer clusters, and 9 representative

conformers were chosen from each cluster. The Boltzmann distribution of 9 representative conformers was given in **Table S12.2**. The proportion of each conformer ranges from 2.14% to 41.69%. Hence, the ECD of 9 representative conformers were predicted and the weighted ECD spectrum was given in **Figure S12.2**.

The predicted ECD spectrum of (*S*)-**8b** is opposite to the experimental results in 300 nm wavelength, which means that the experimental product is in *R*-configuration.

**Table S12.2.** The Boltzmann distribution of the investigated molecule (*S*)-**8b**.

| ( <i>S</i> )- <b>8b</b> | Index | DG(kcal/mol) | Q <sub>i(Relat)</sub> | Percent |
|-------------------------|-------|--------------|-----------------------|---------|
| conf26.log              | 1     | 0            | 1                     | 41.69%  |
| conf18.log              | 2     | 0.44929716   | 0.468449              | 19.53%  |
| conf22.log              | 3     | 0.65072787   | 0.333436              | 13.90%  |
| conf17.log              | 4     | 0.94000998   | 0.204629              | 8.53%   |
| conf10.log              | 5     | 1.08998487   | 0.158867              | 6.62%   |
| conf13.log              | 6     | 1.56626496   | 0.071108              | 2.96%   |
| conf9.log               | 7     | 1.69866957   | 0.056867              | 2.37%   |
| conf14.log              | 8     | 1.73067258   | 0.053877              | 2.25%   |
| conf12.log              | 9     | 1.75891053   | 0.05137               | 2.14%   |

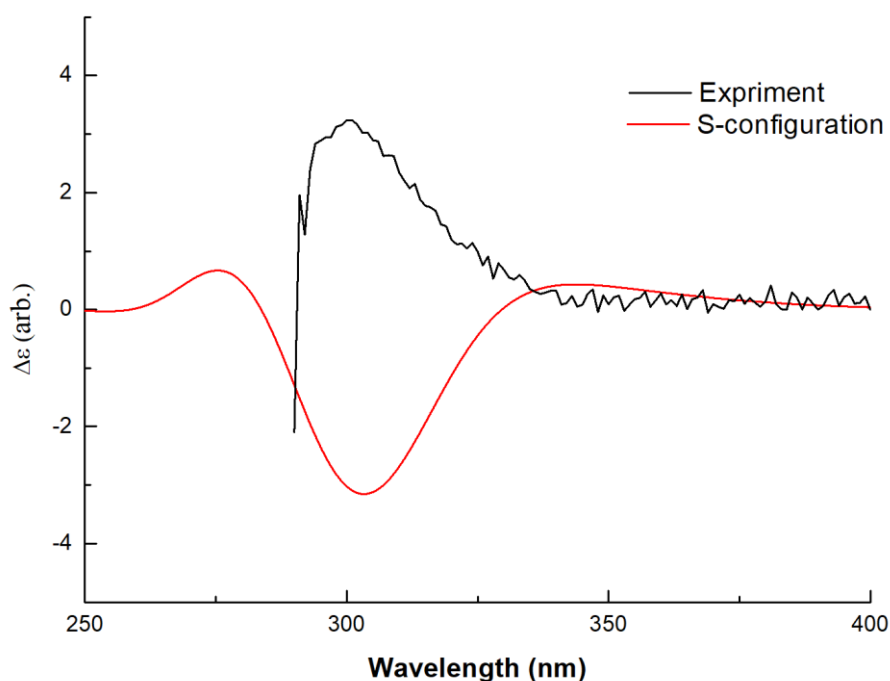

**Figure S12.2.** The experimental and predicted ECD of (*S*)-**8b**.

### 13. NMR, HRMS spectra and HPLC chromatograms

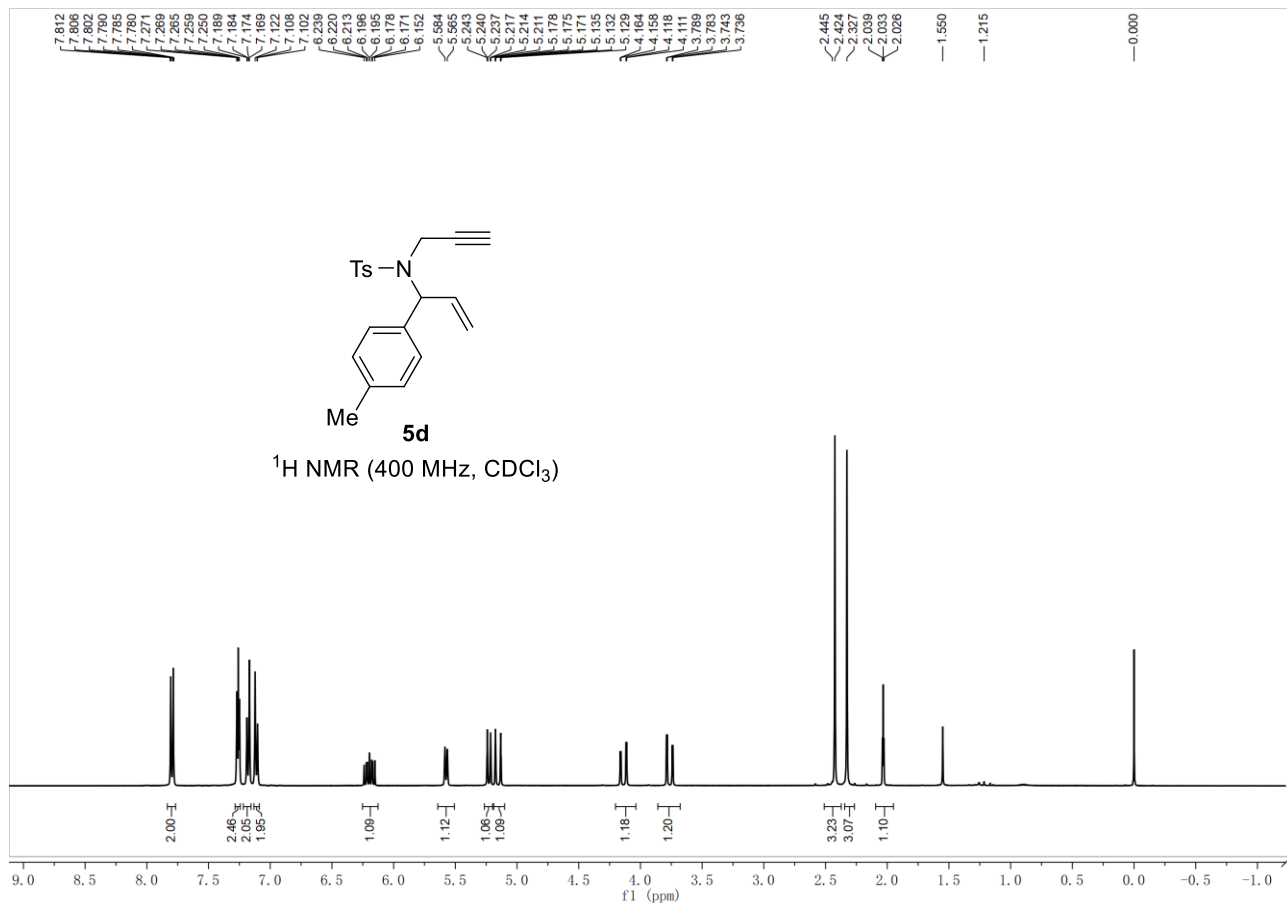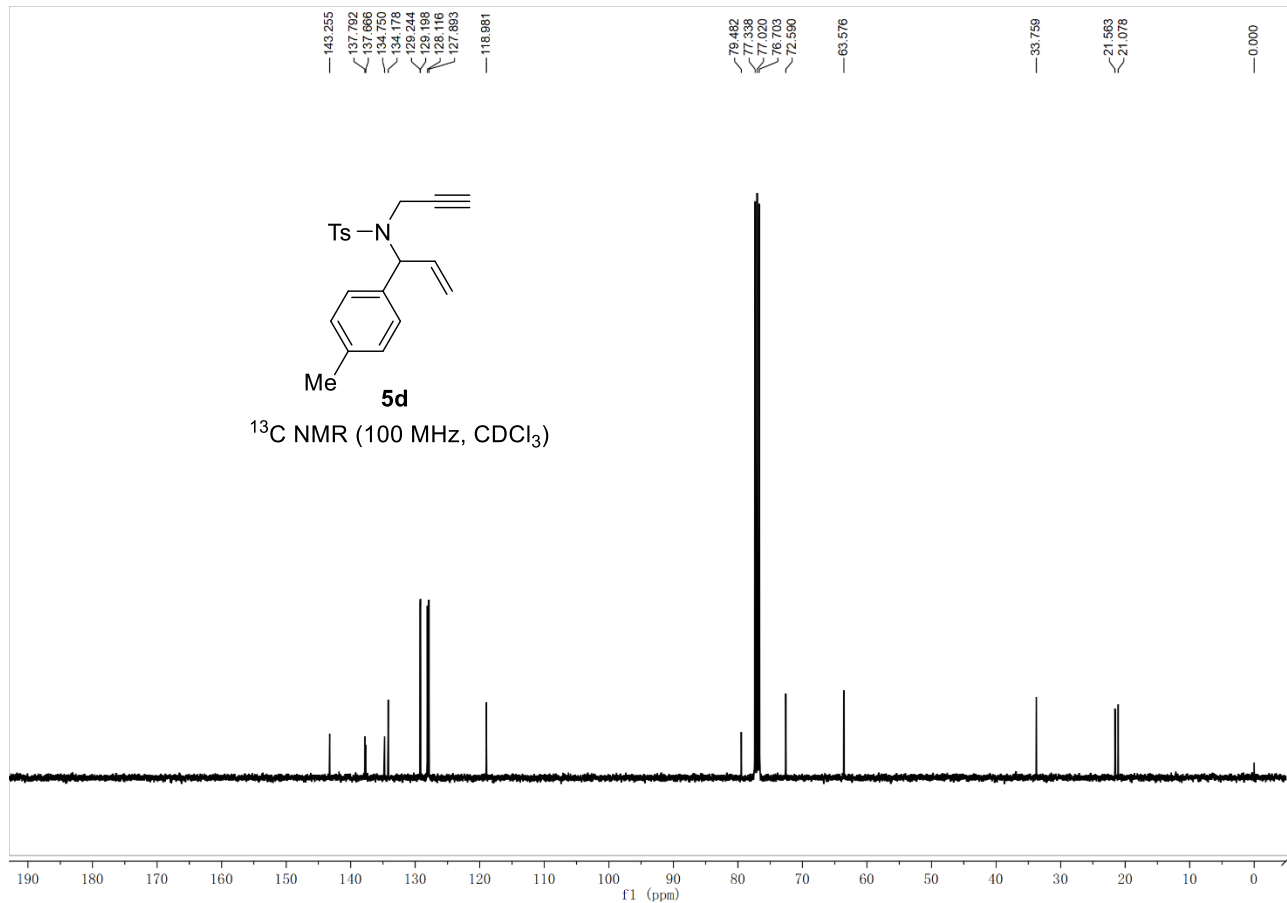

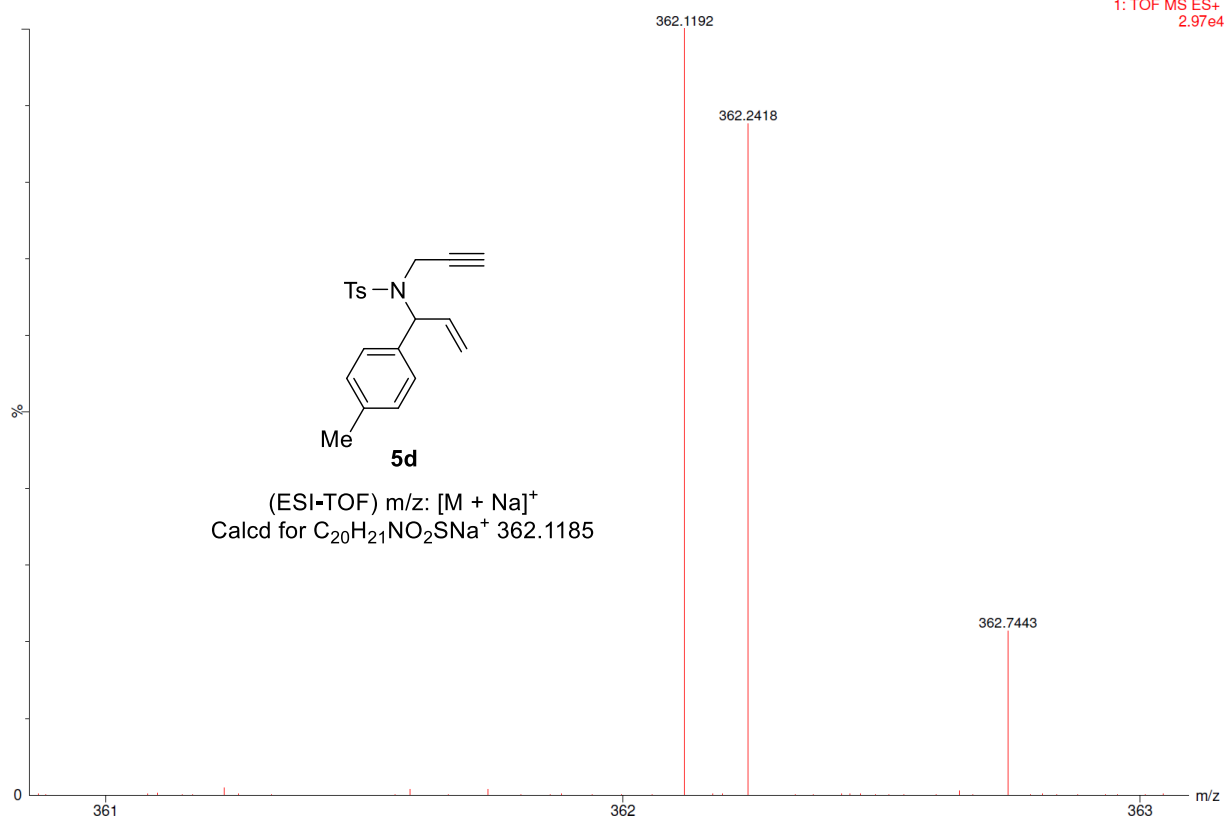

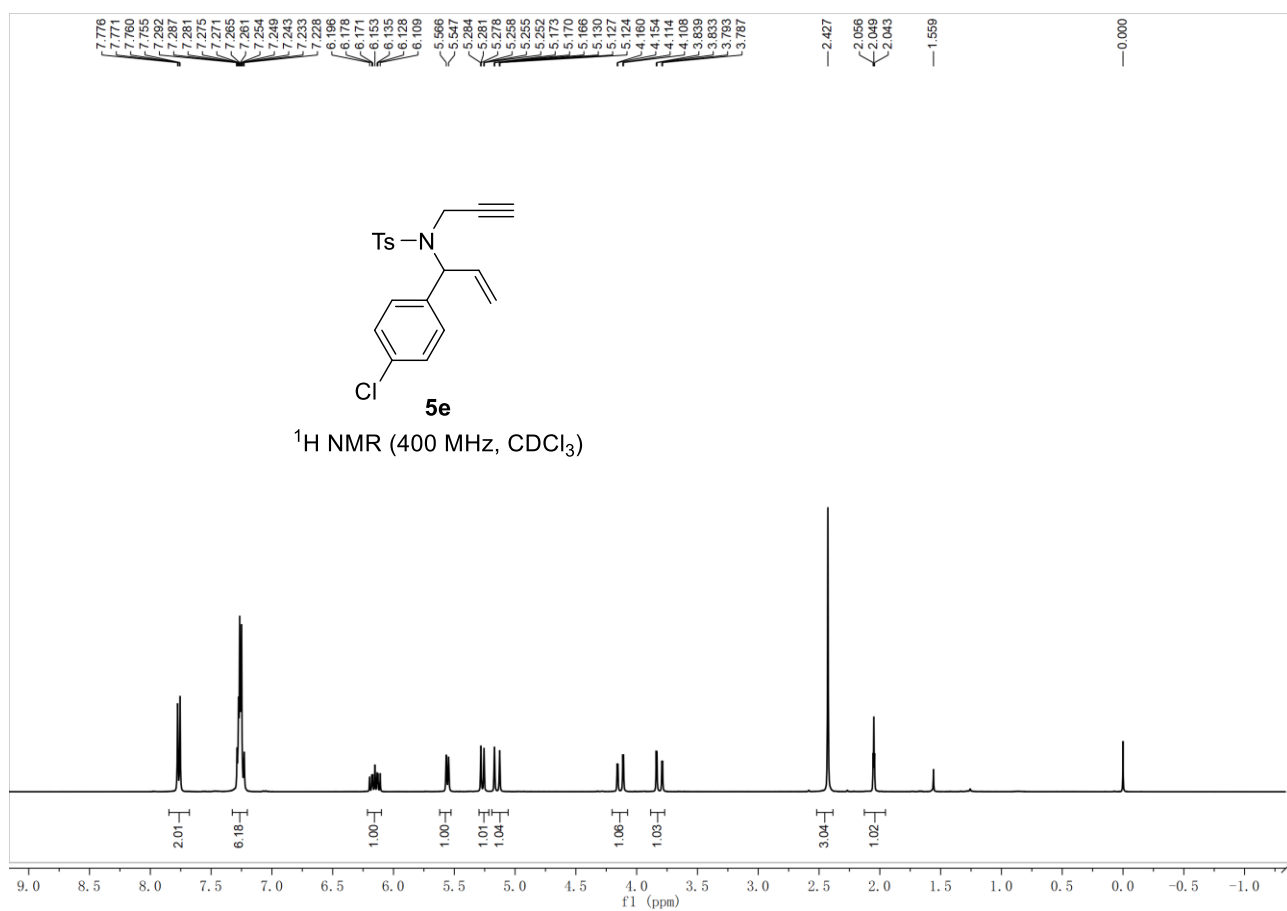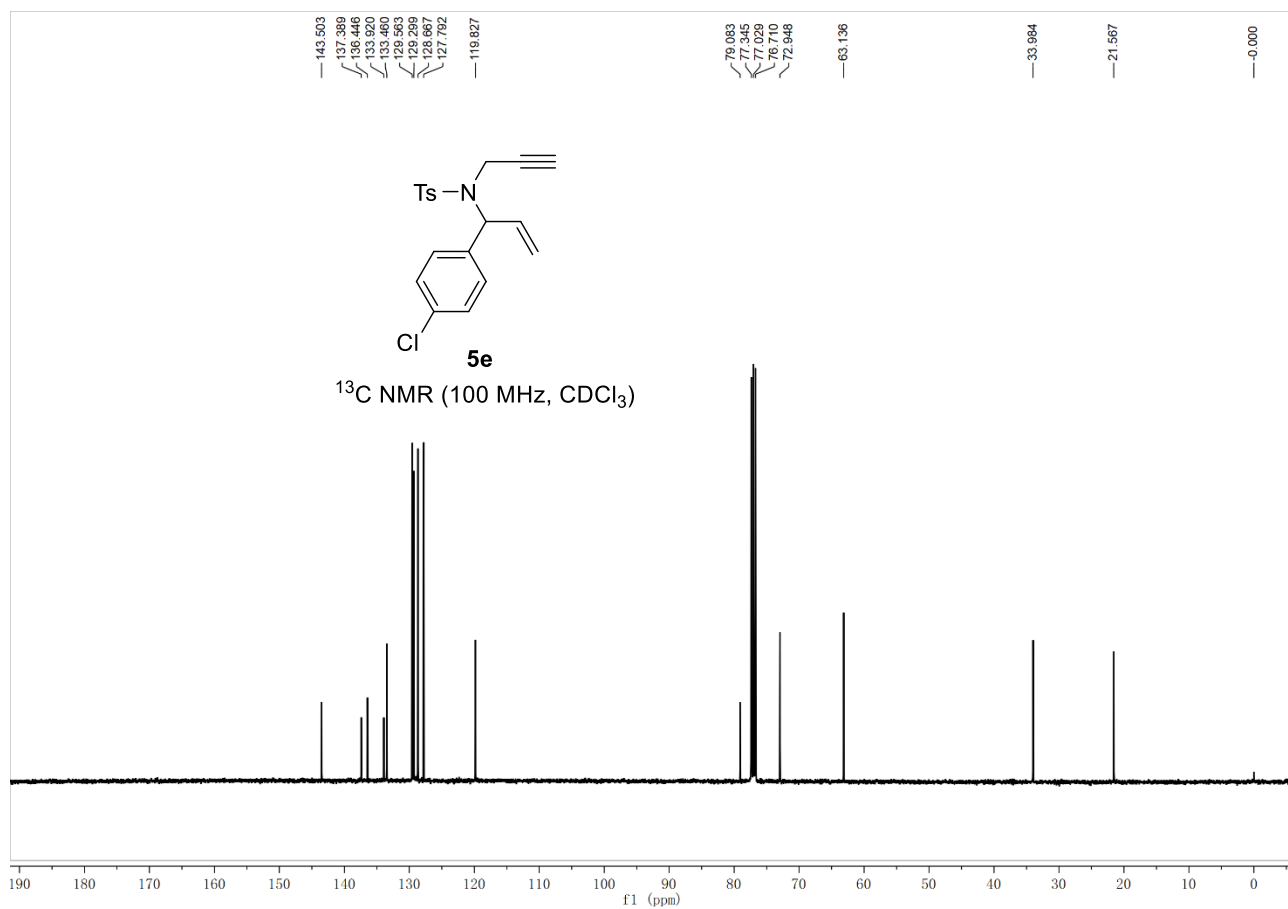

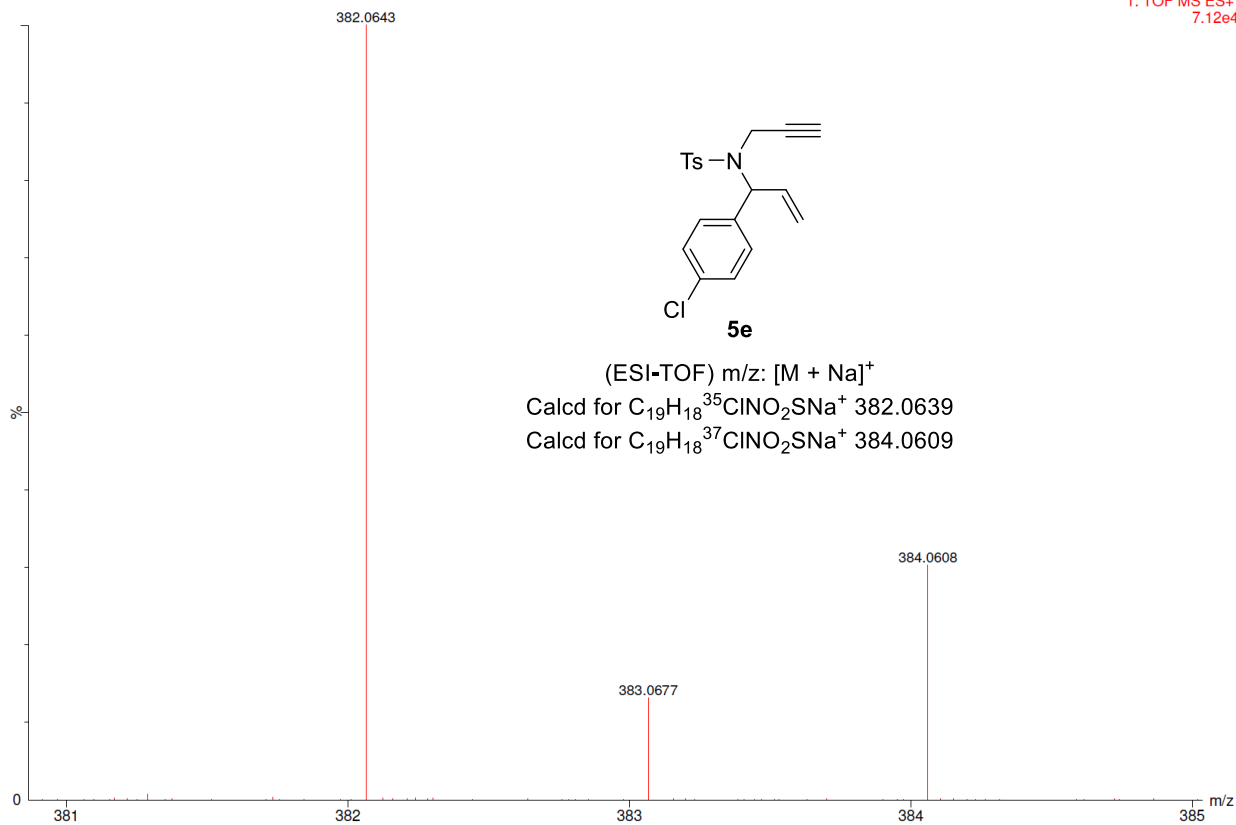

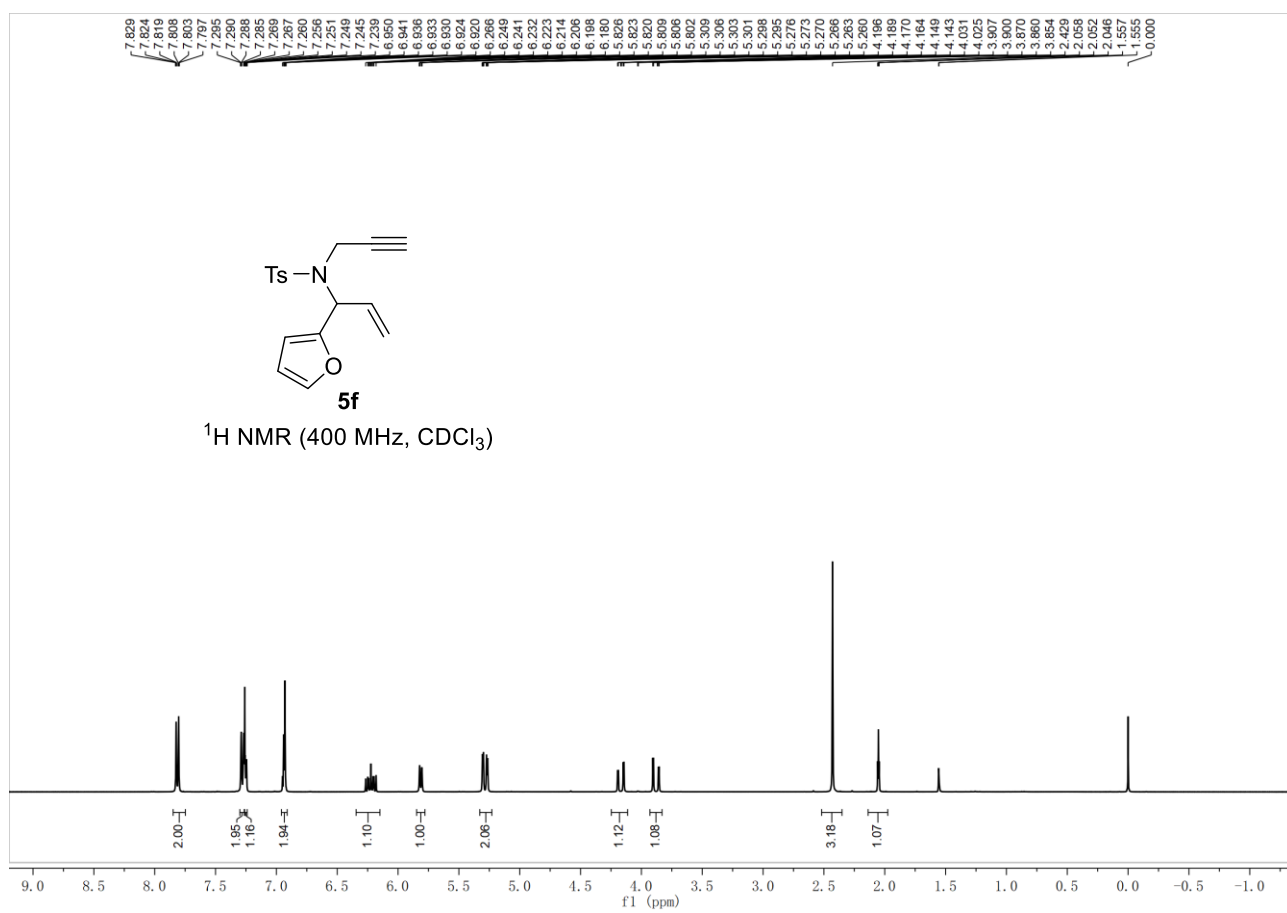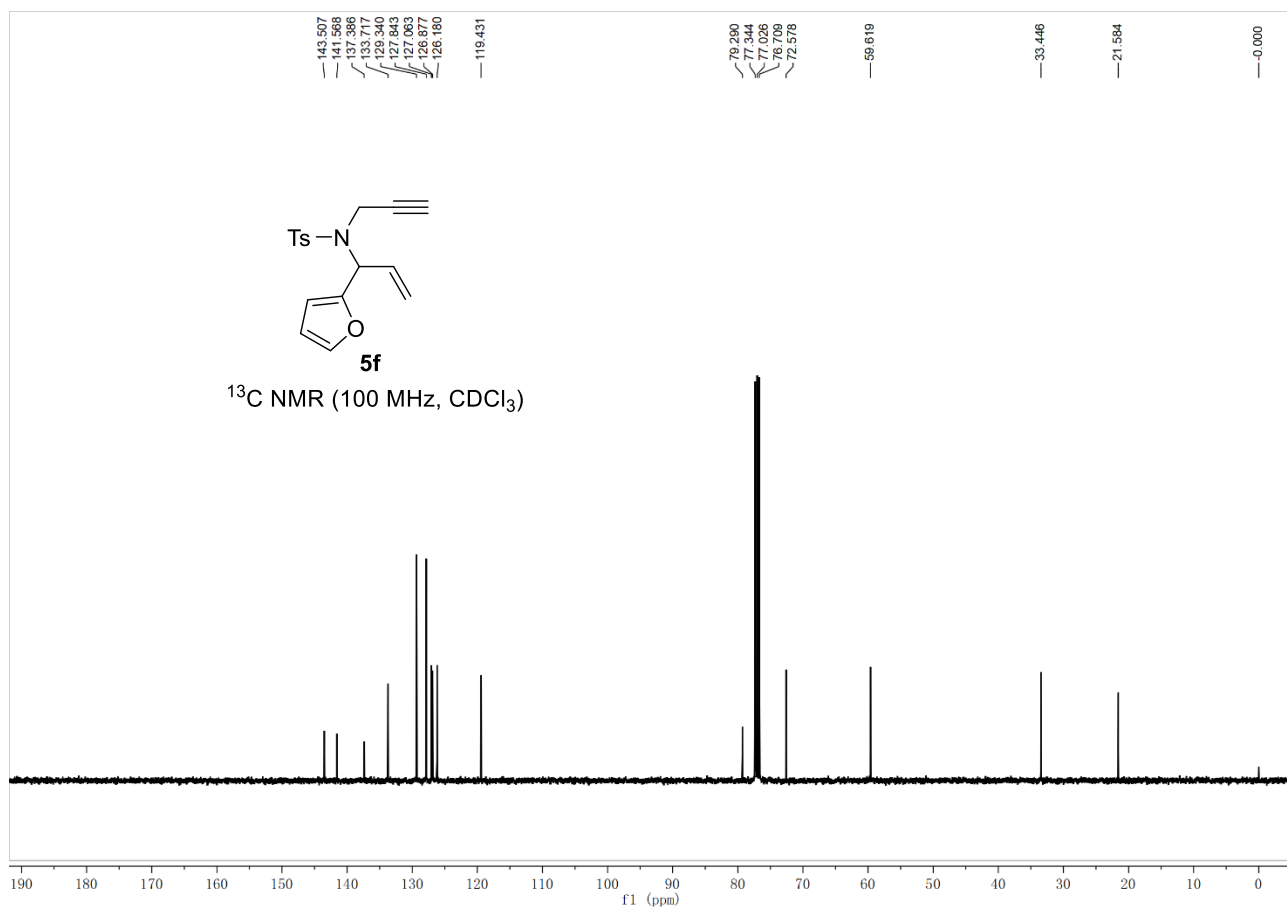



1: TOF MS ES+  
1.36e3

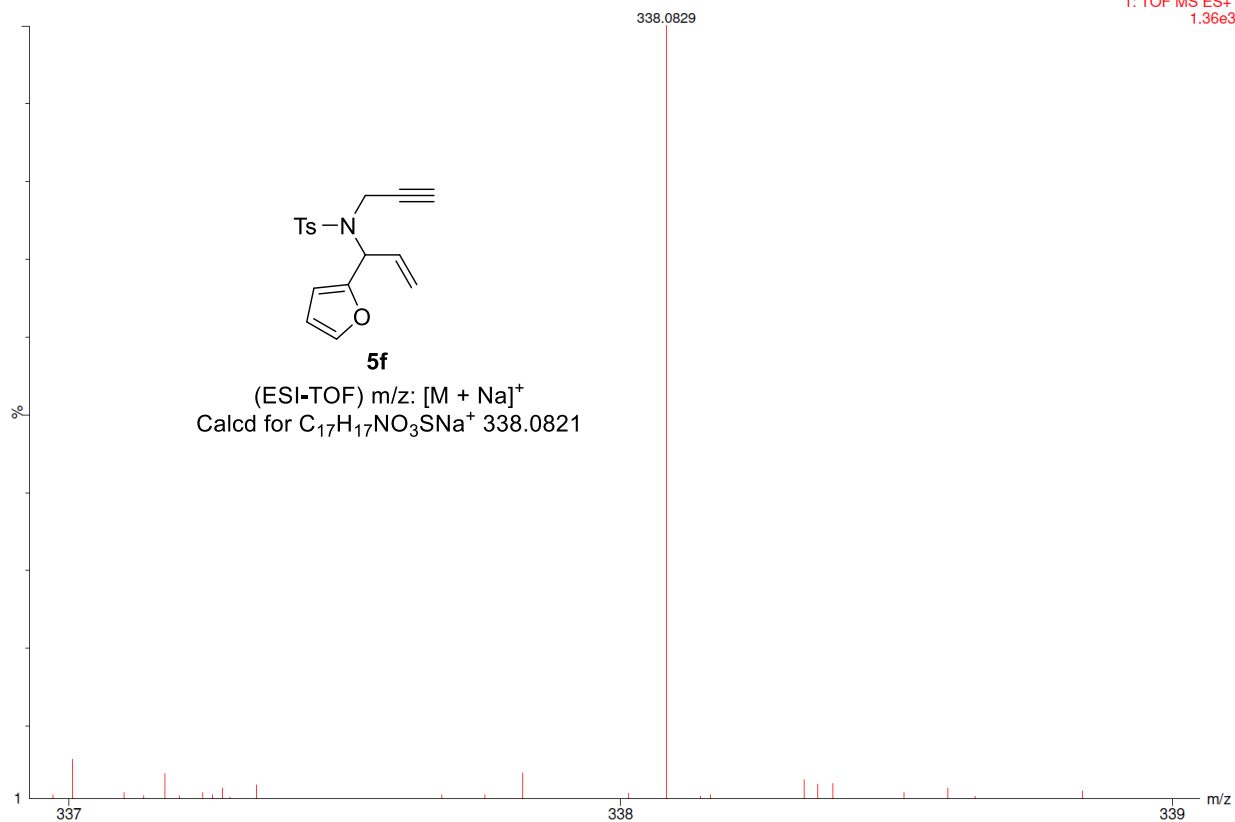

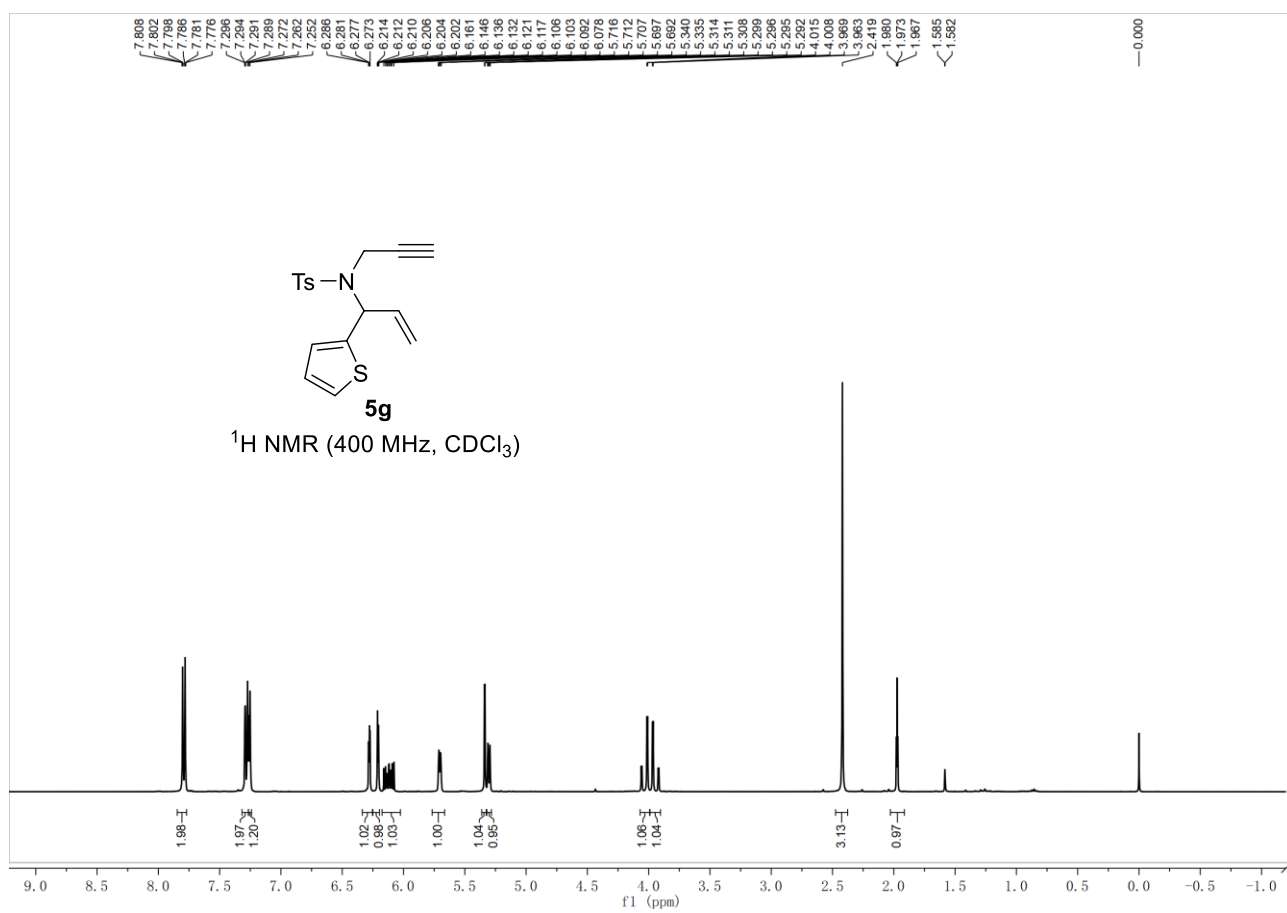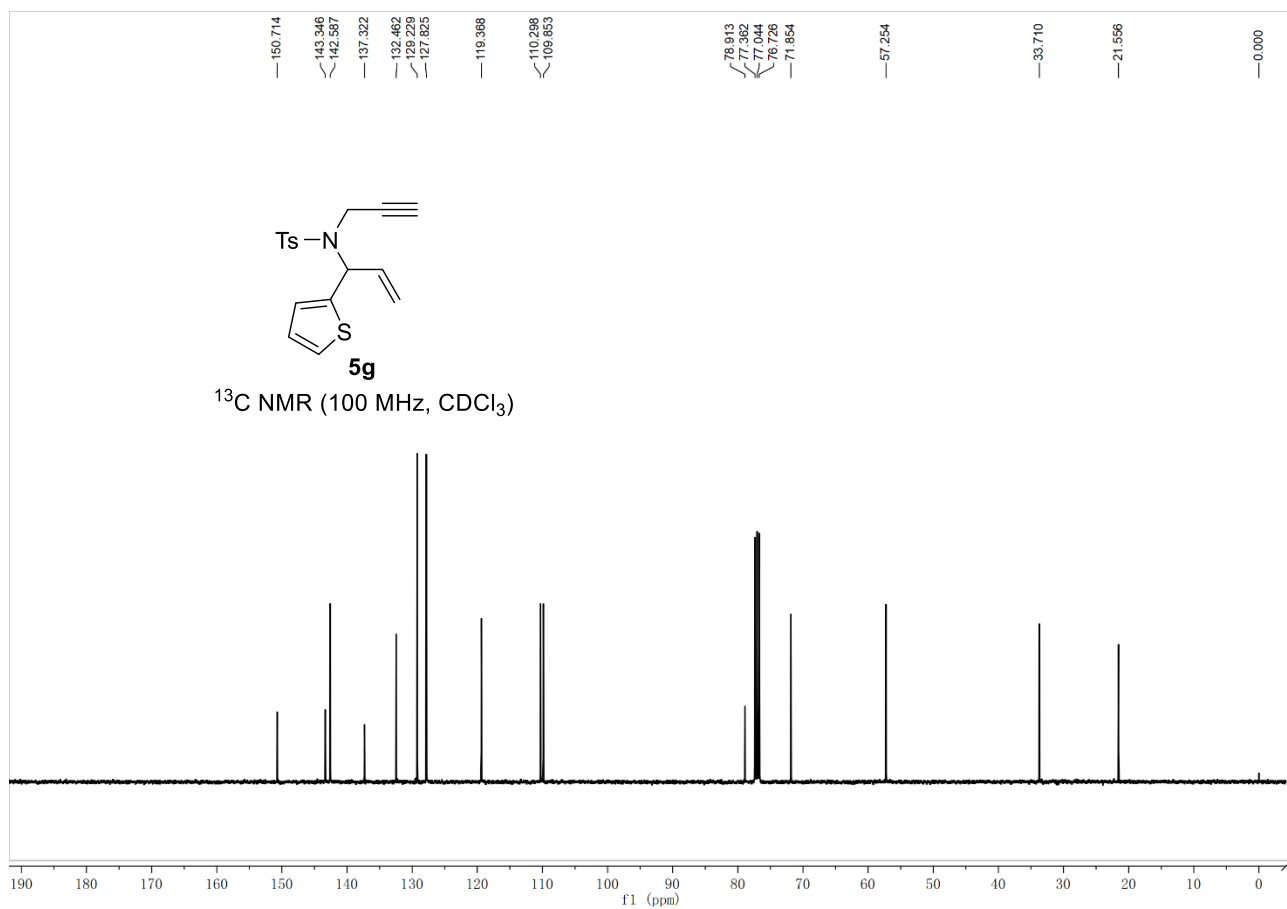

1: TOF MS ES+  
1.21e6

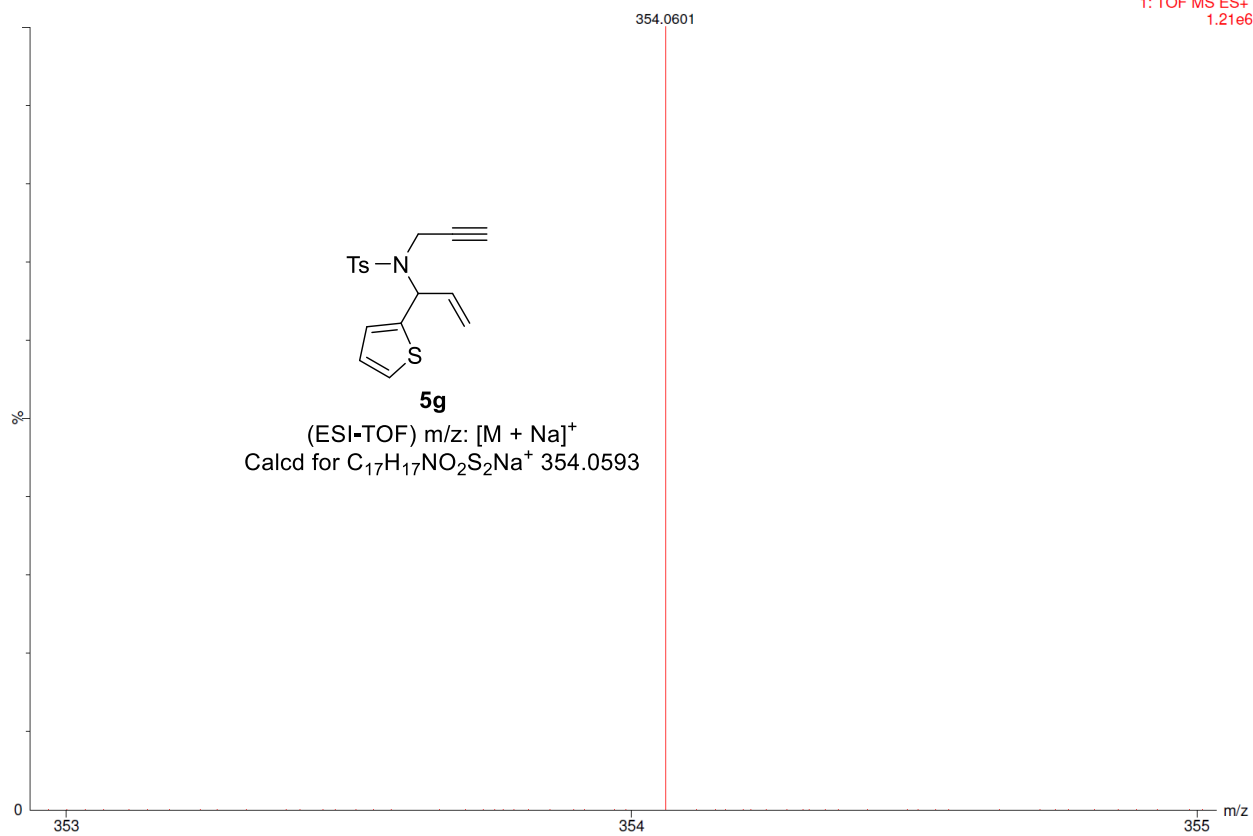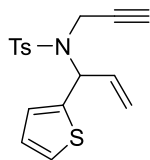

**5g**

(ESI-TOF) m/z: [M + Na]<sup>+</sup>  
Calcd for C<sub>17</sub>H<sub>17</sub>NO<sub>2</sub>S<sub>2</sub>Na<sup>+</sup> 354.0593

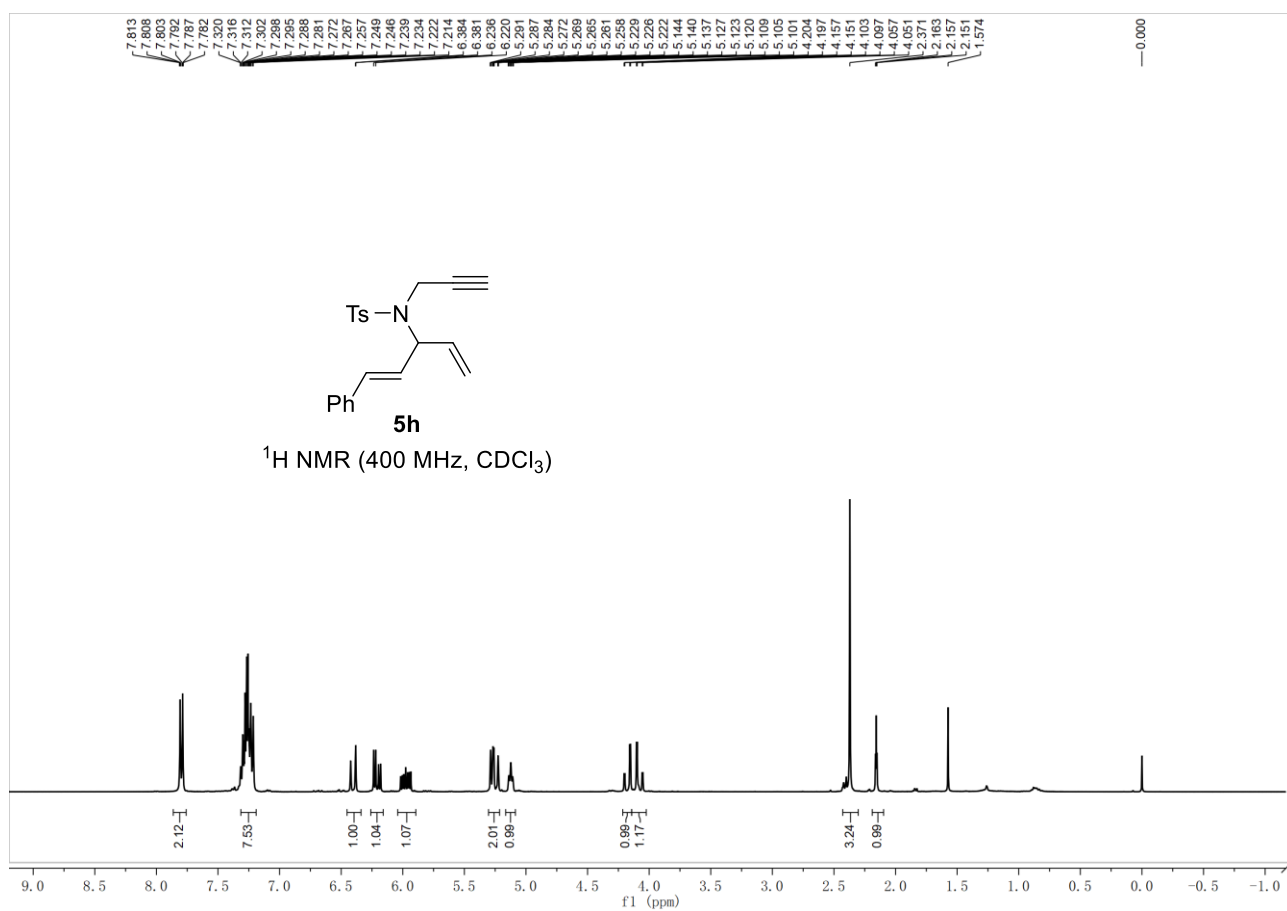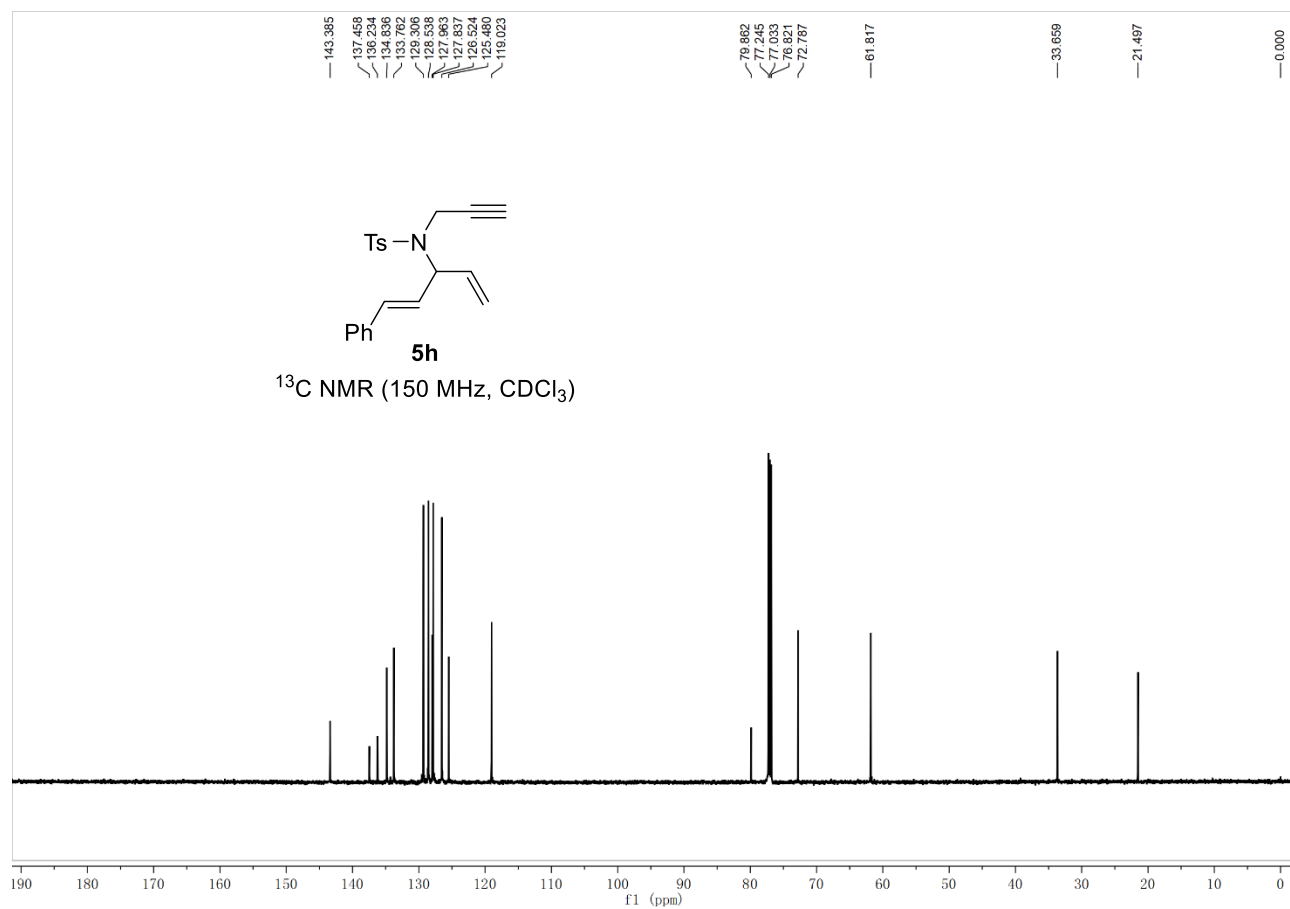

1: TOF MS ES+  
1.29e4

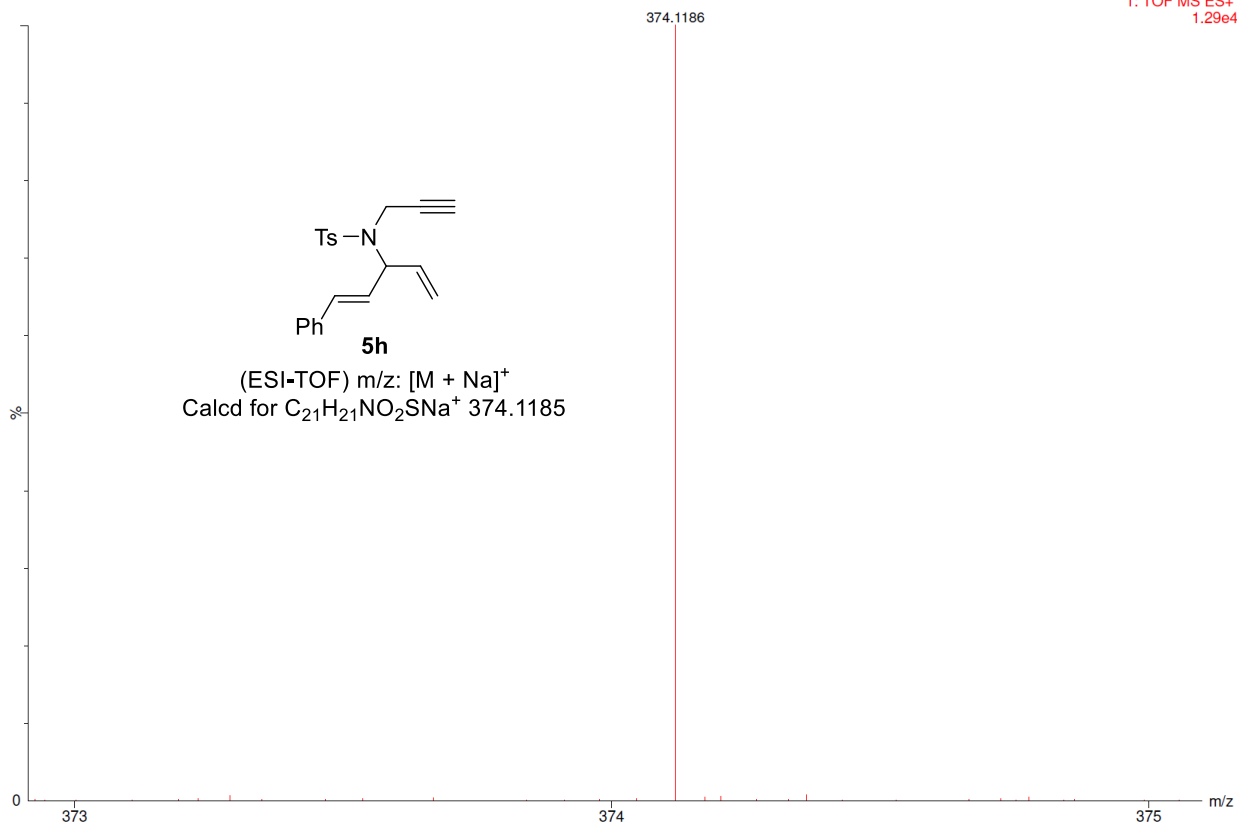

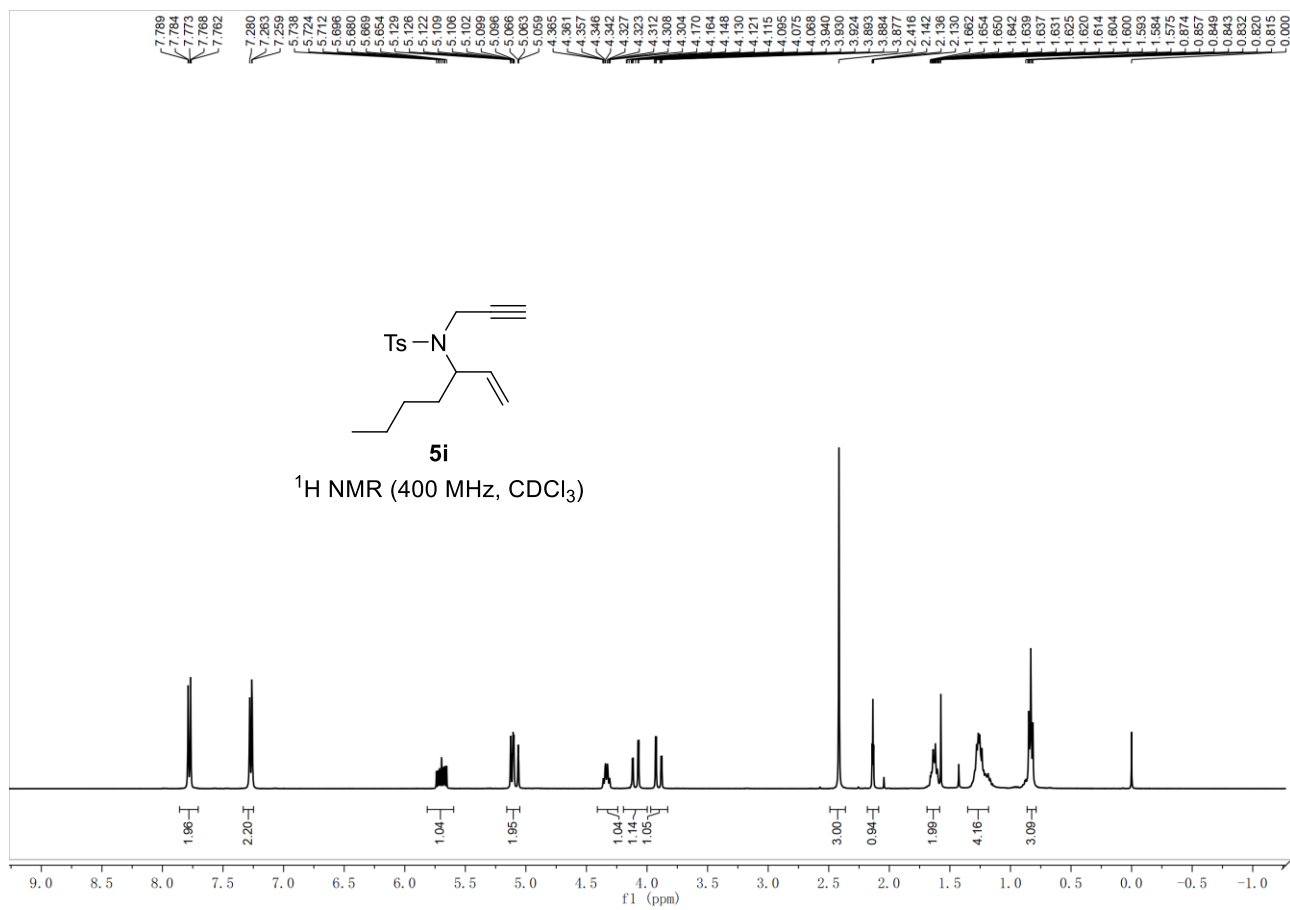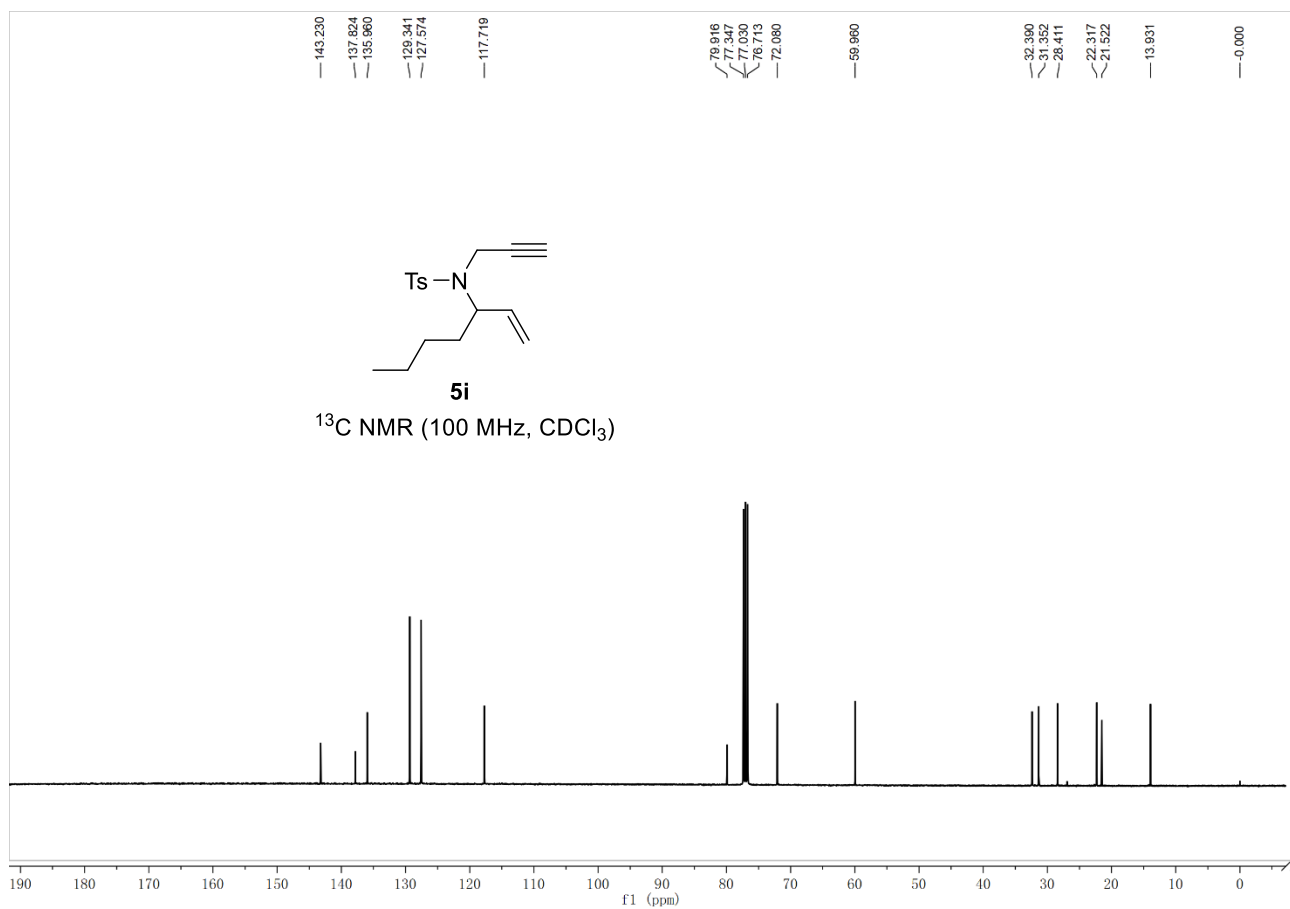

1: TOF MS ES+  
4.18e3

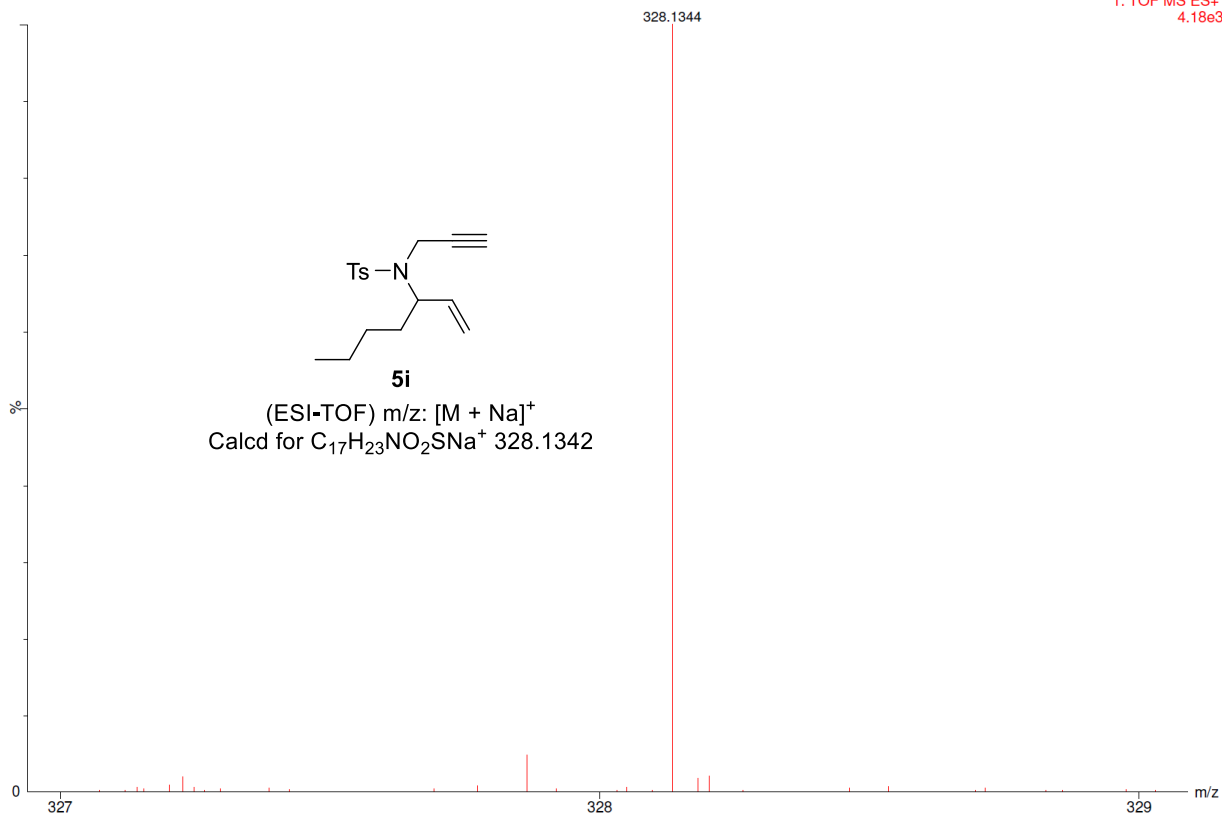

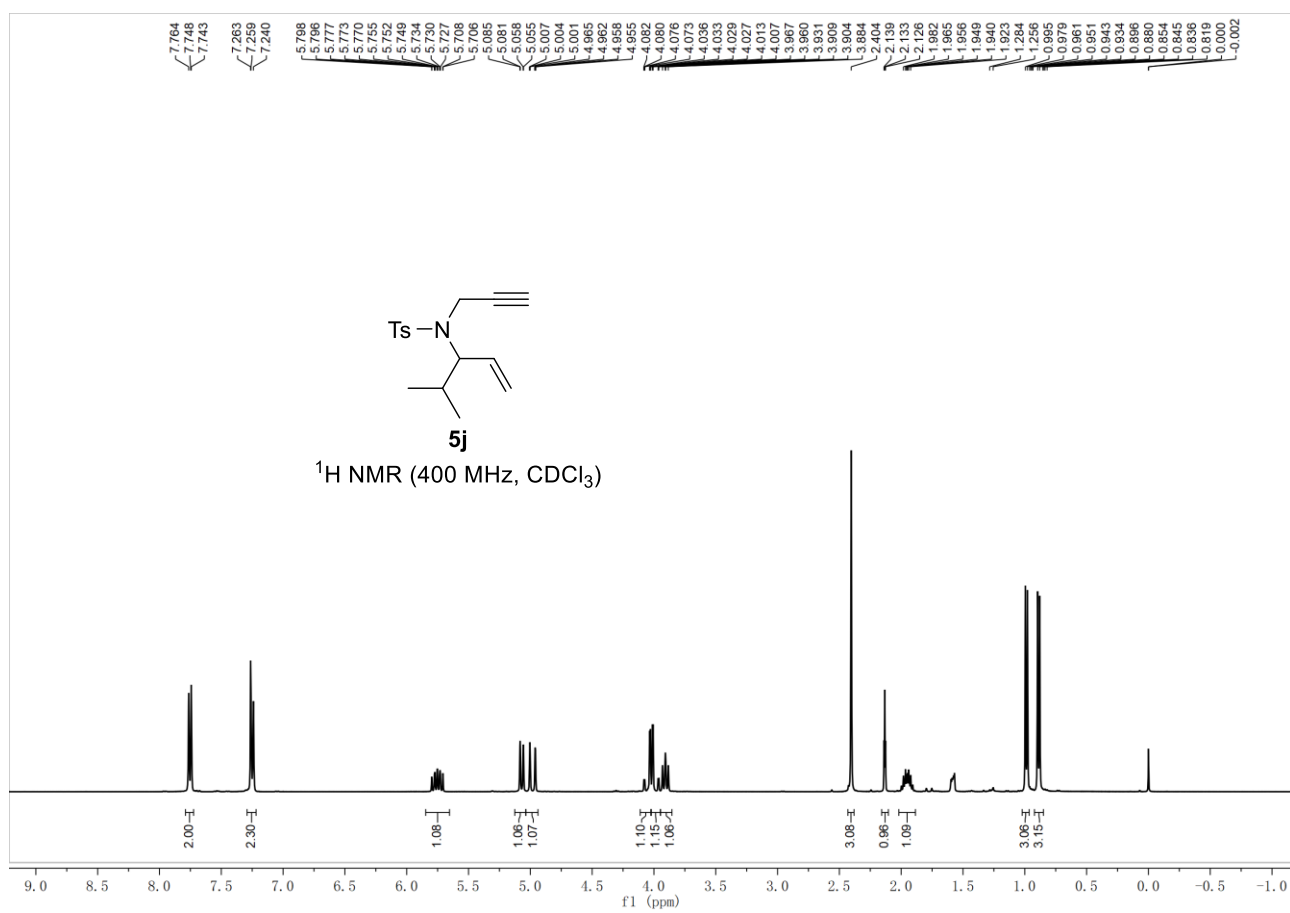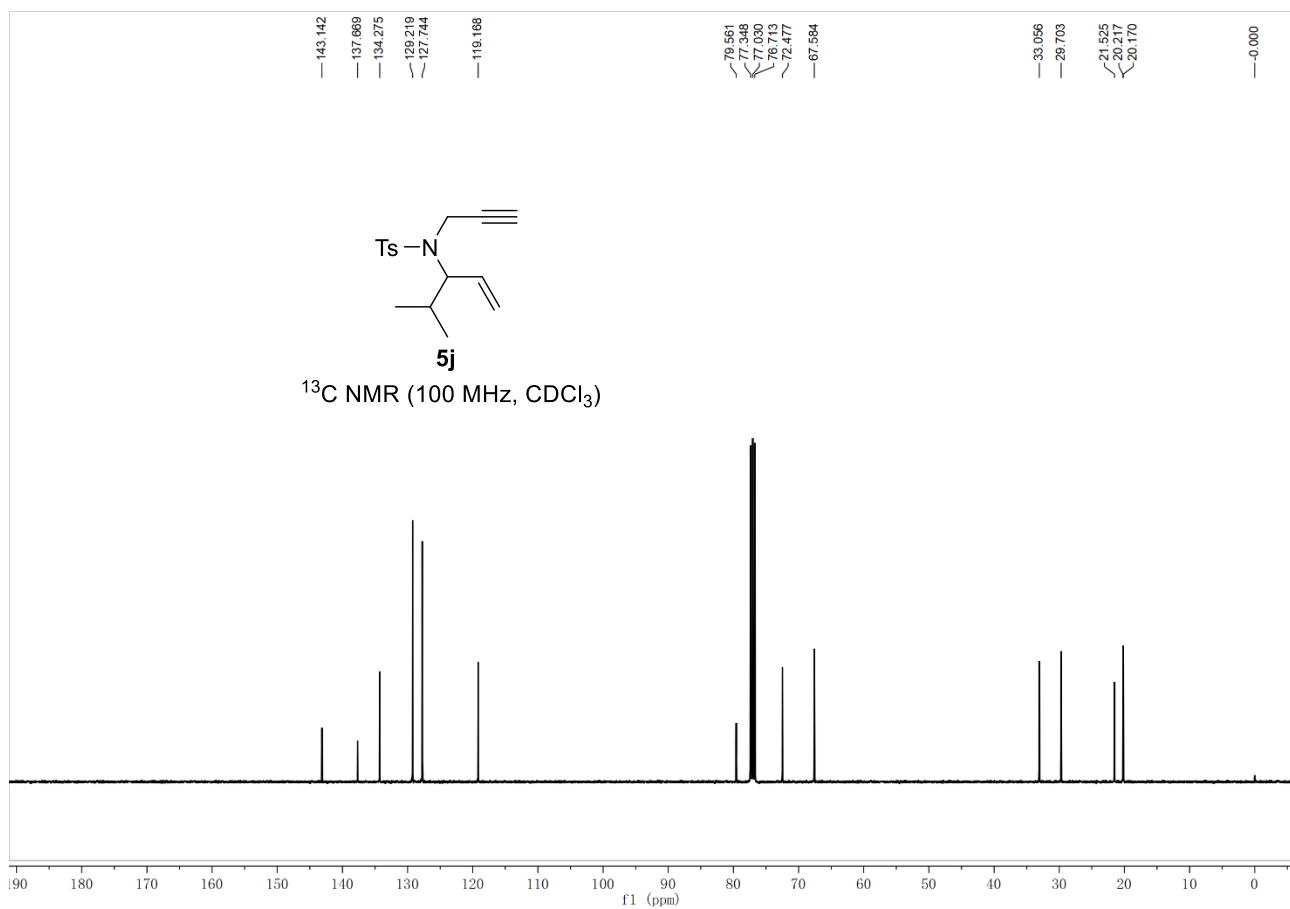



1: TOF MS ES+  
1.20e5

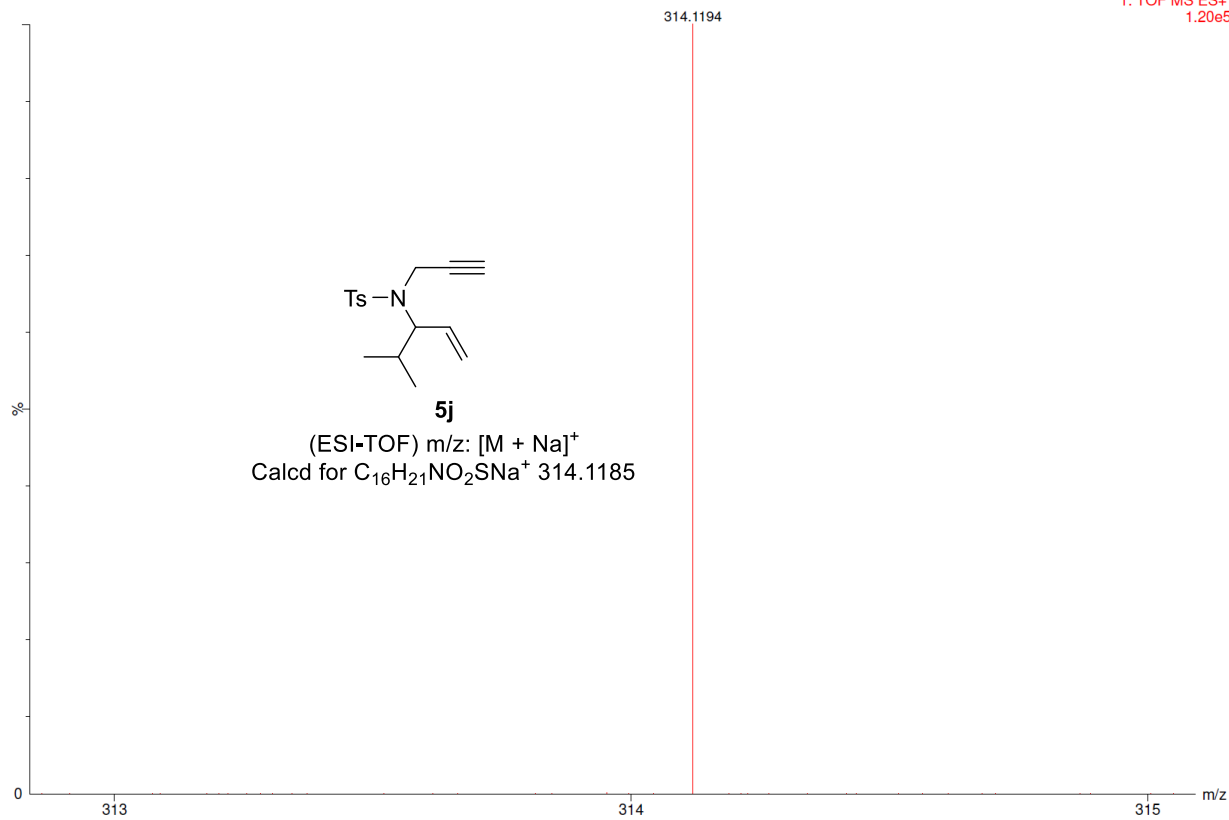

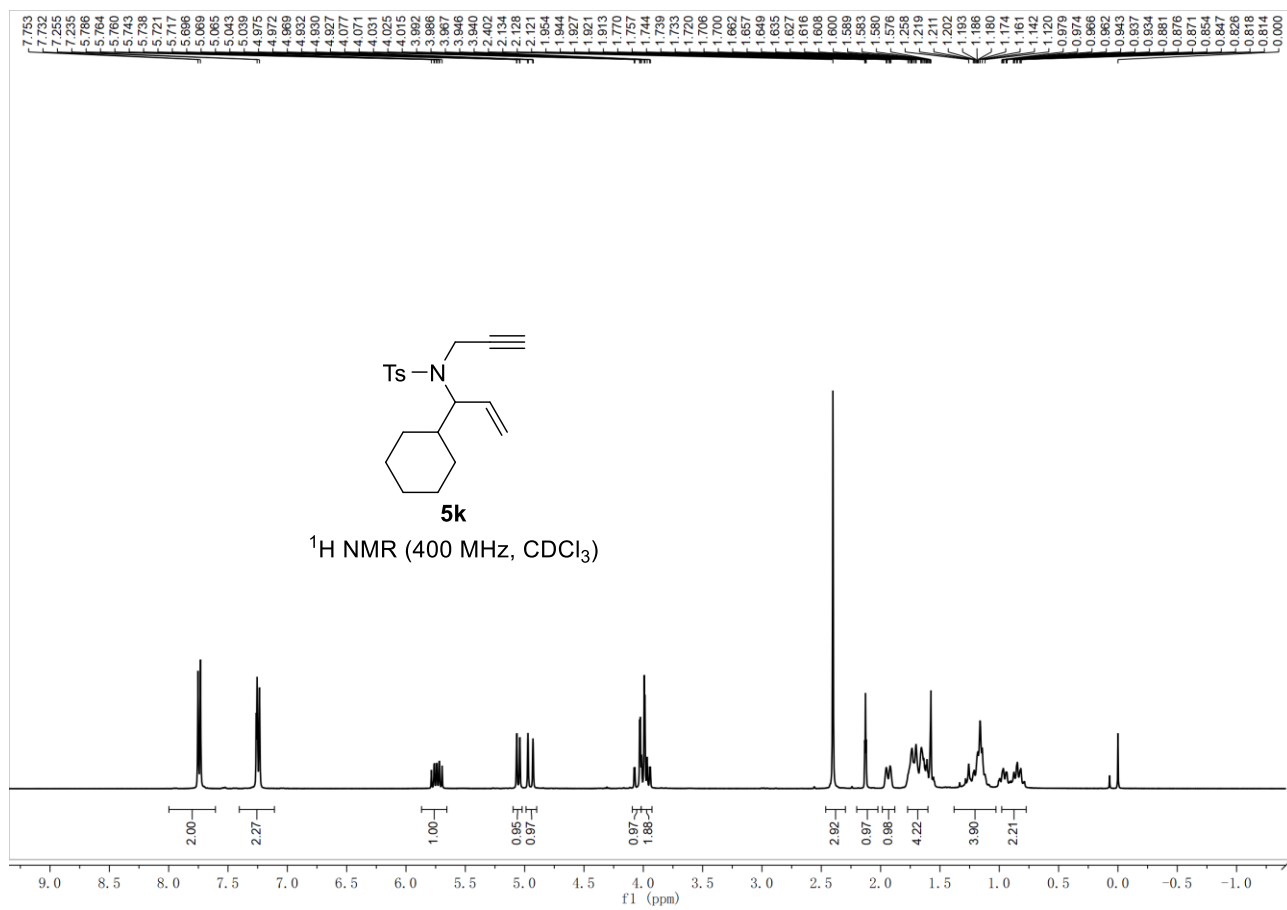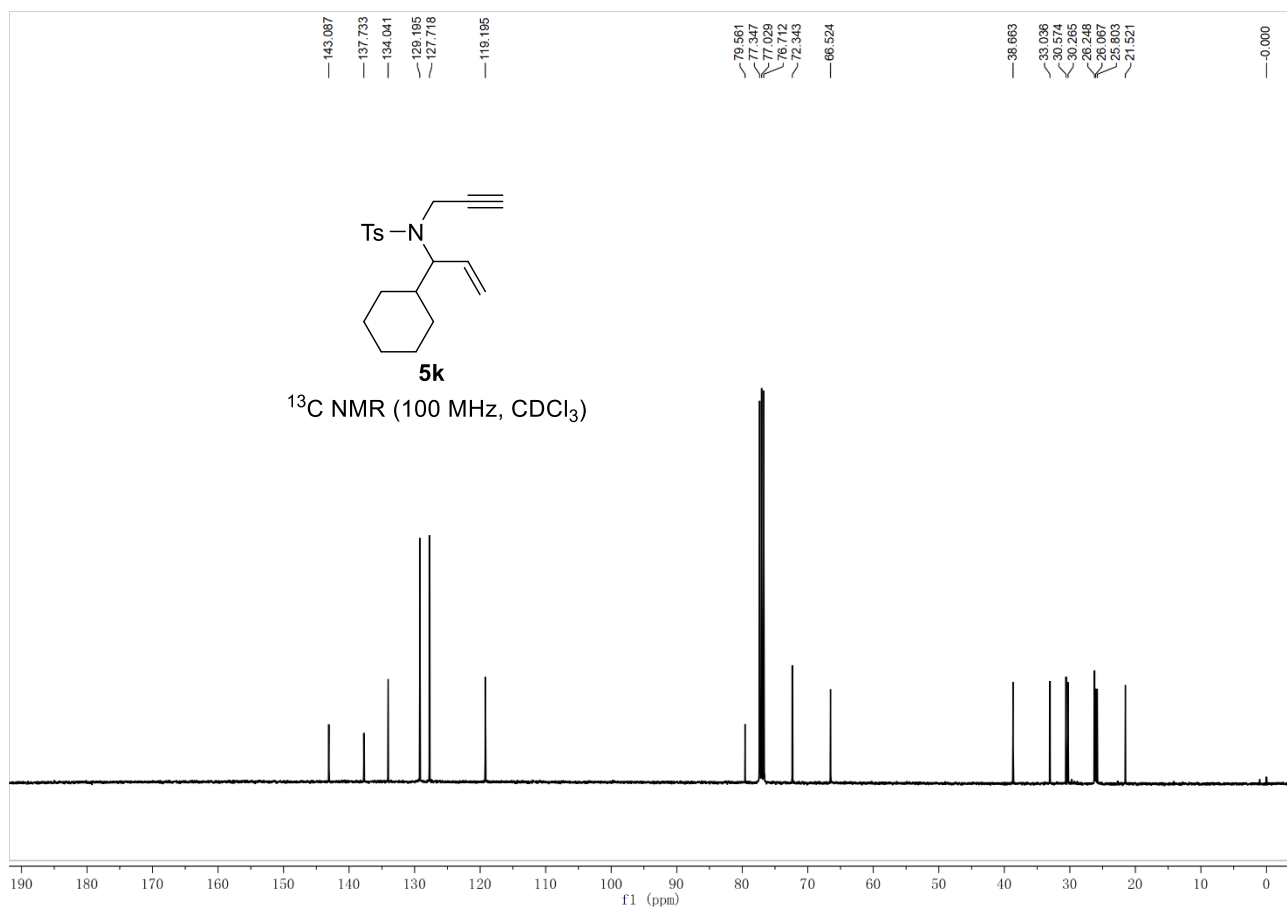

1: TOF MS ES+  
5.66e3

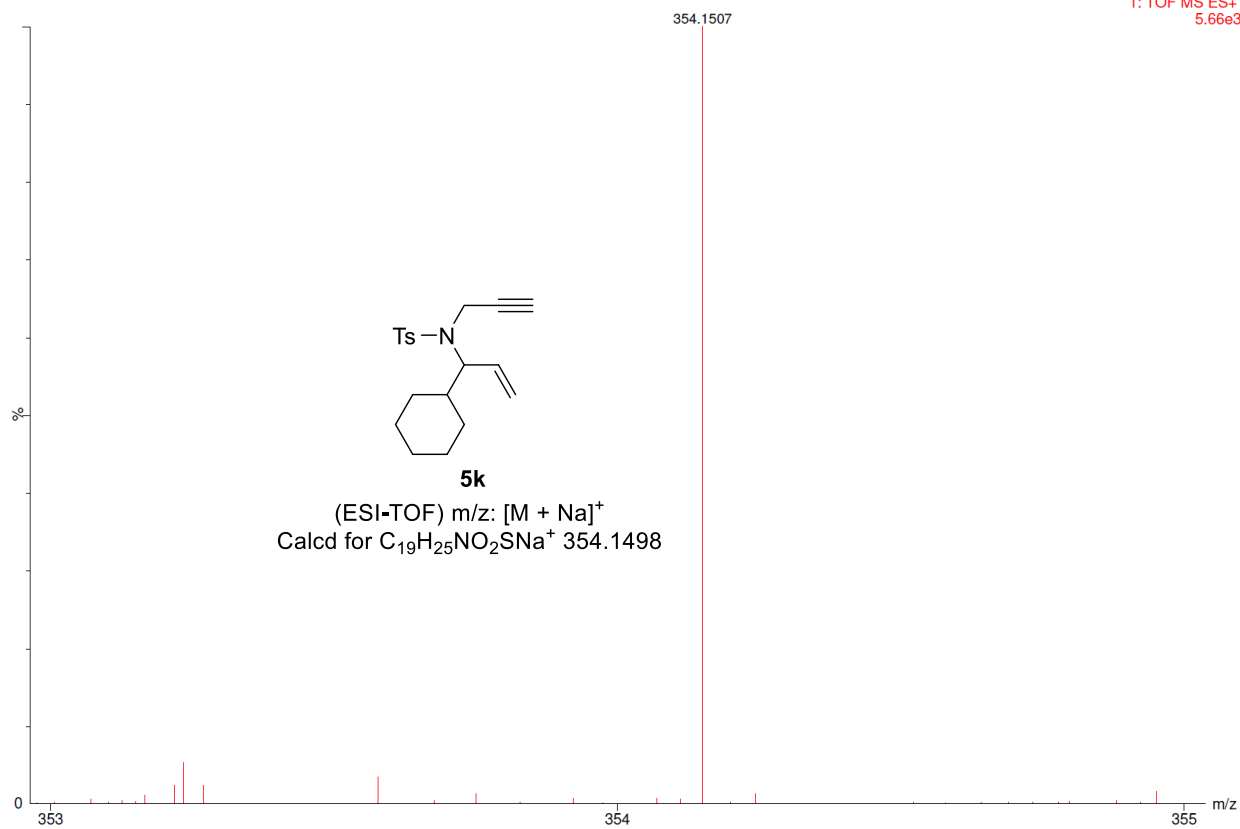

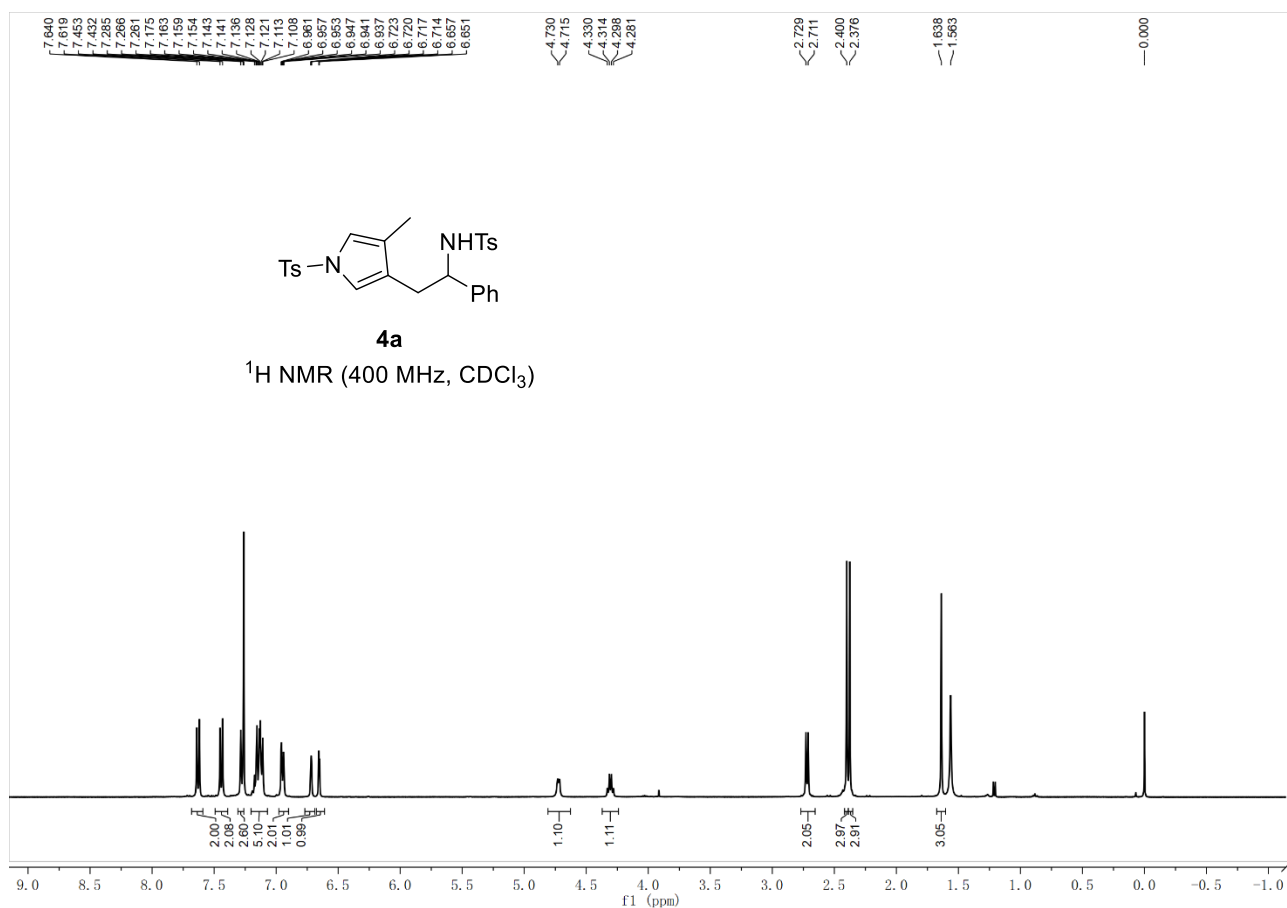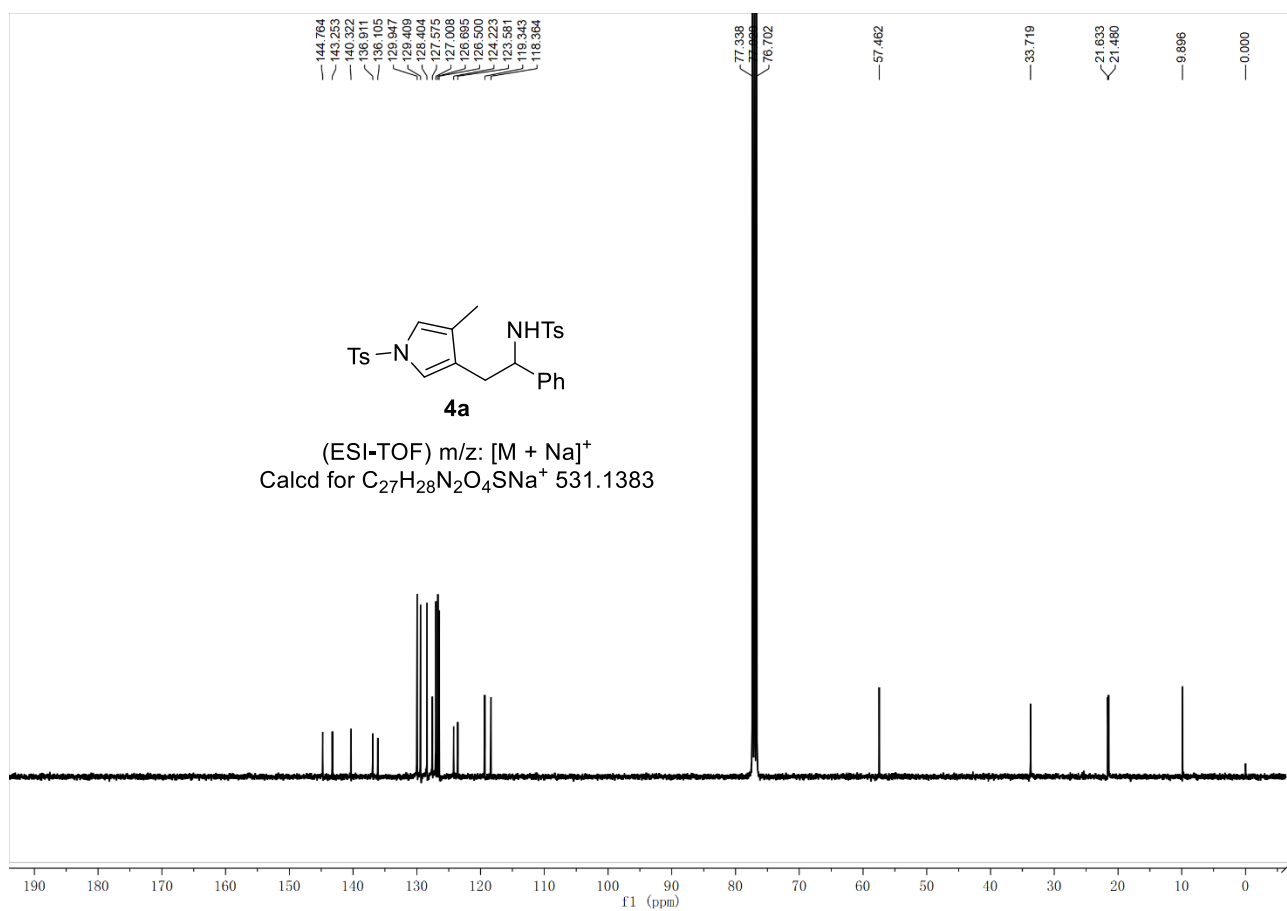

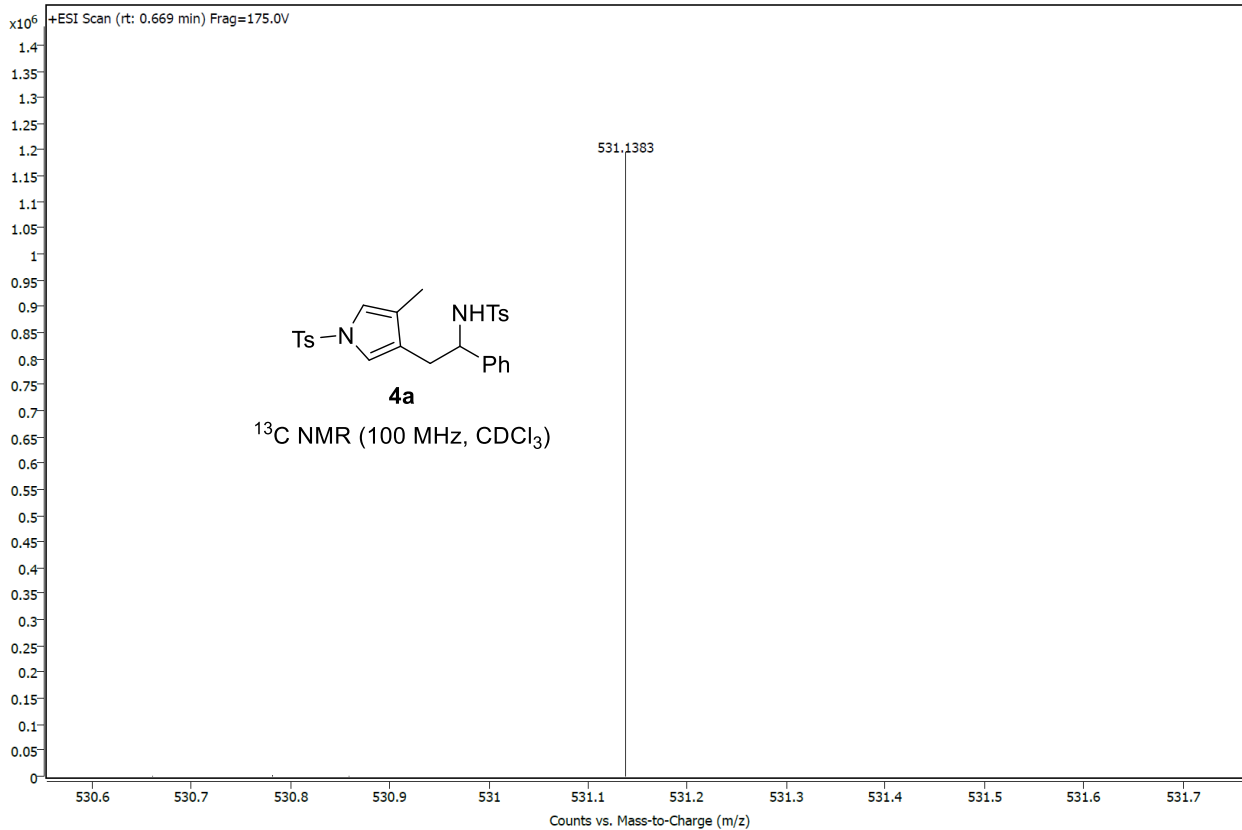

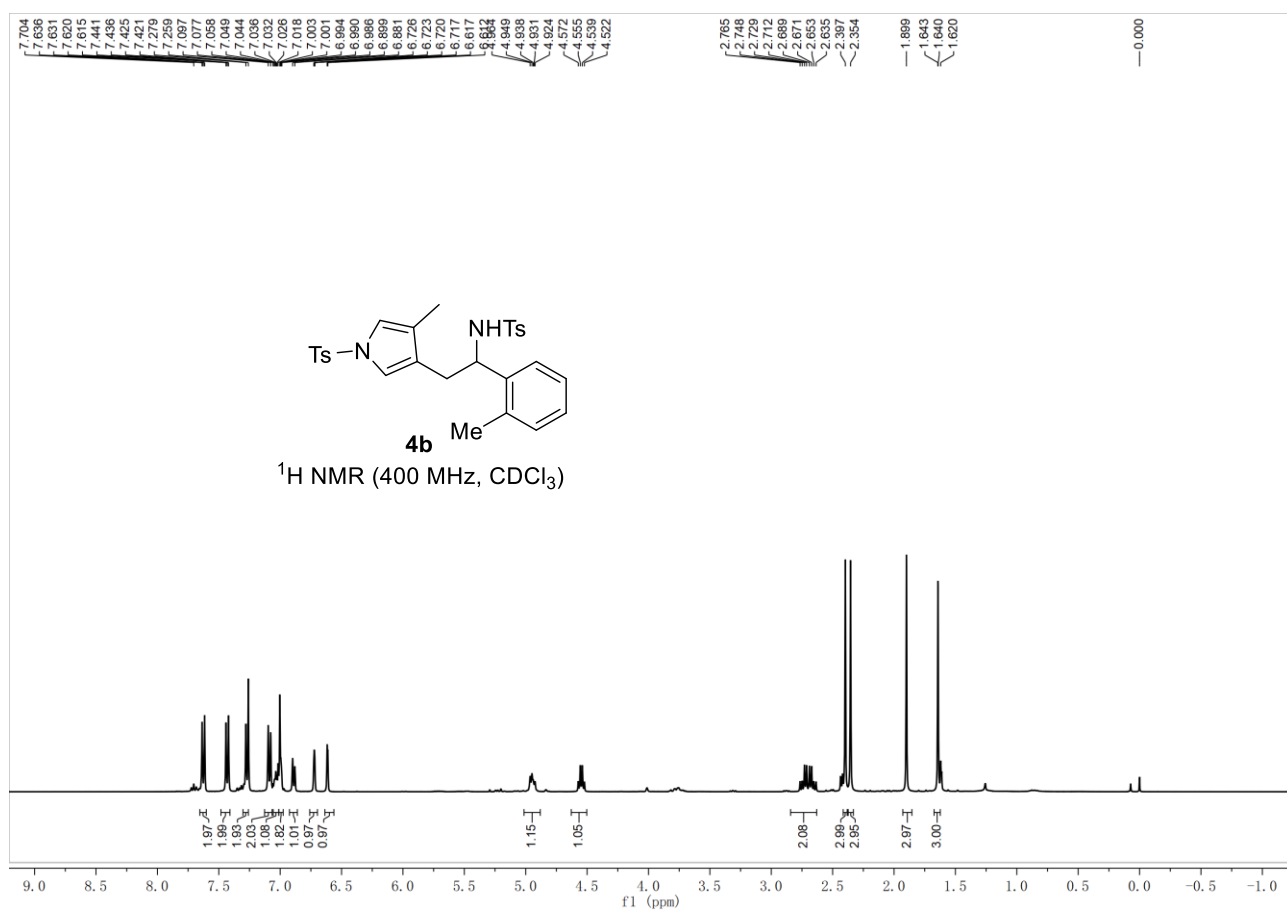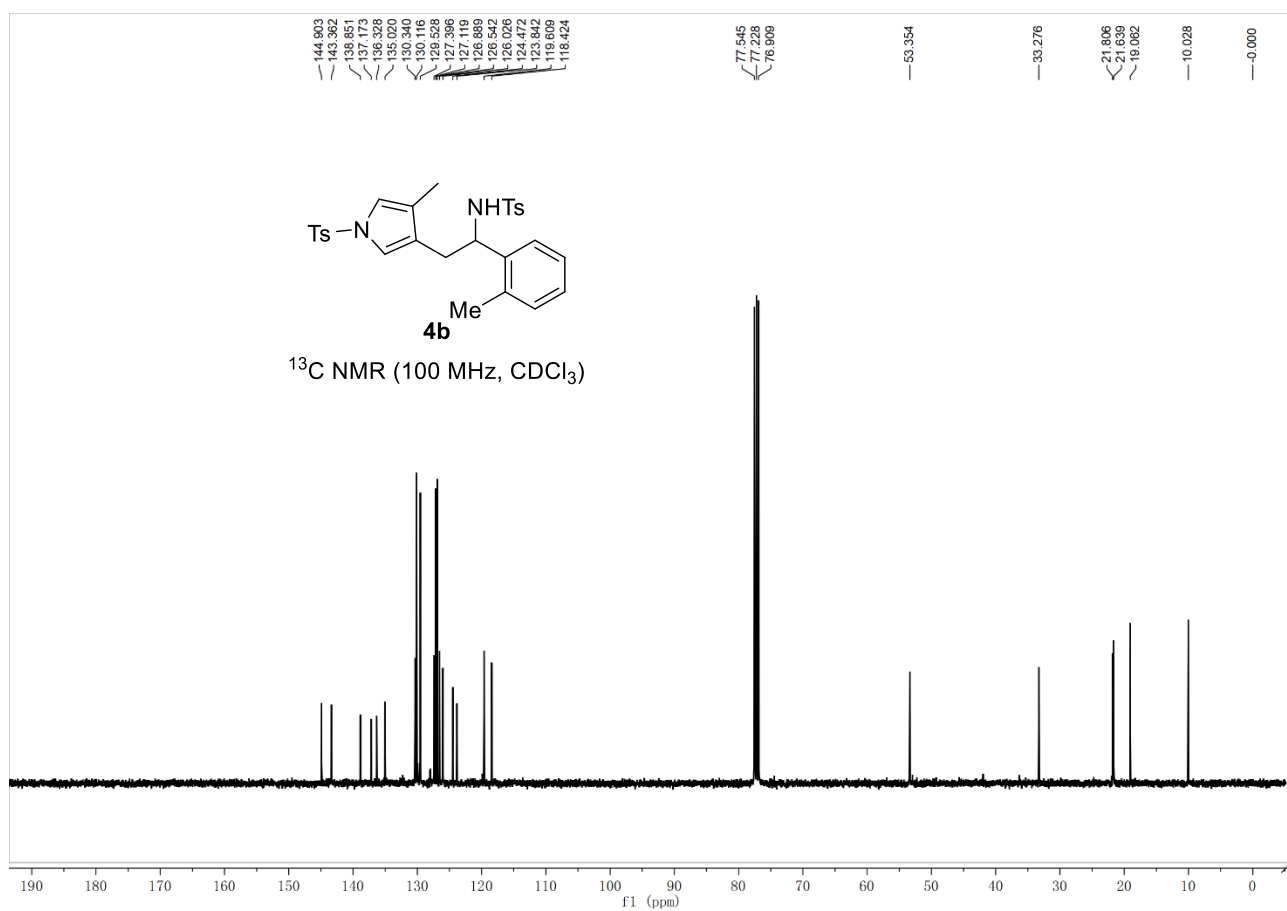

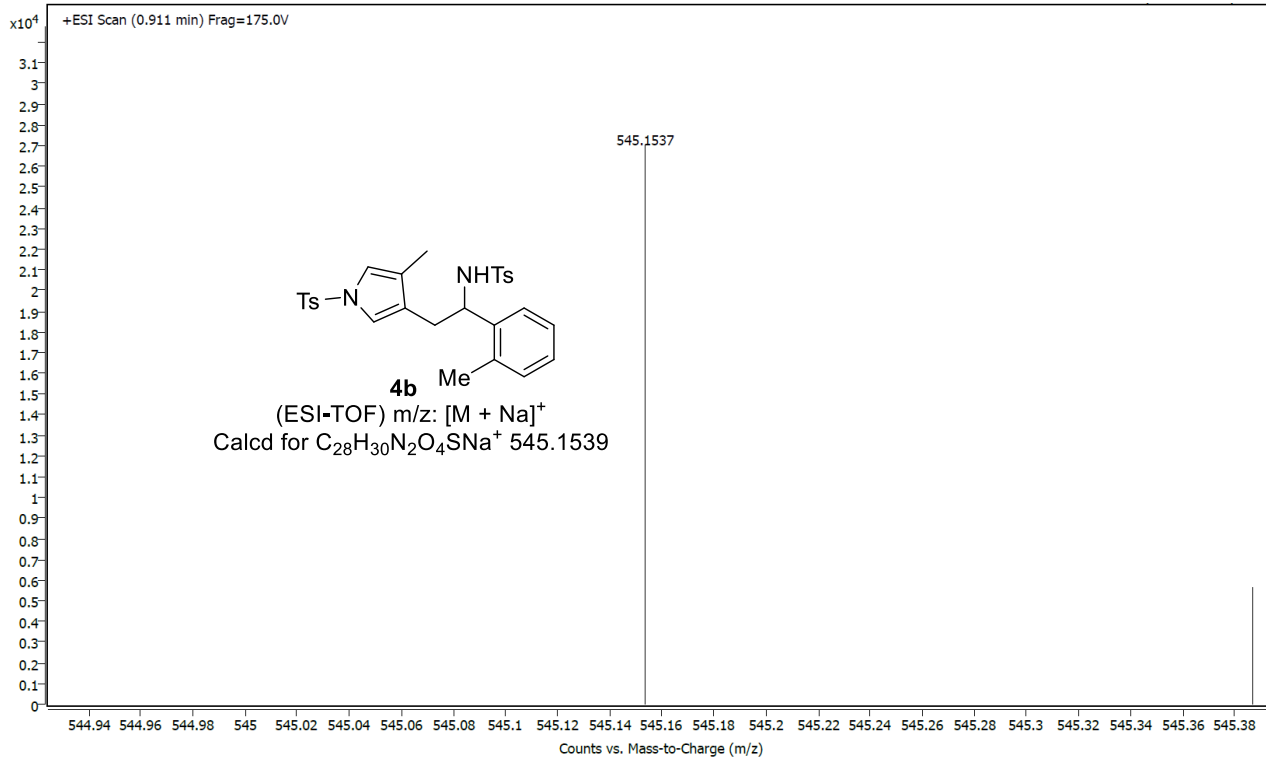

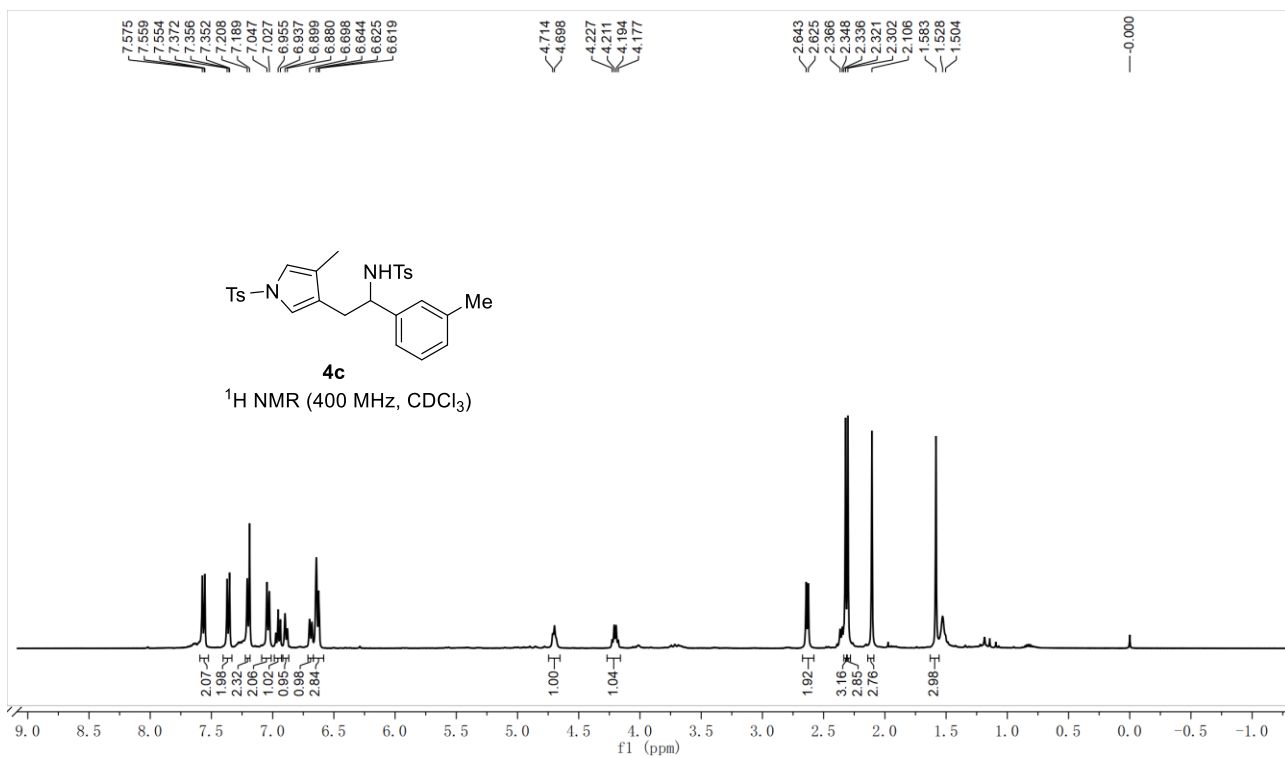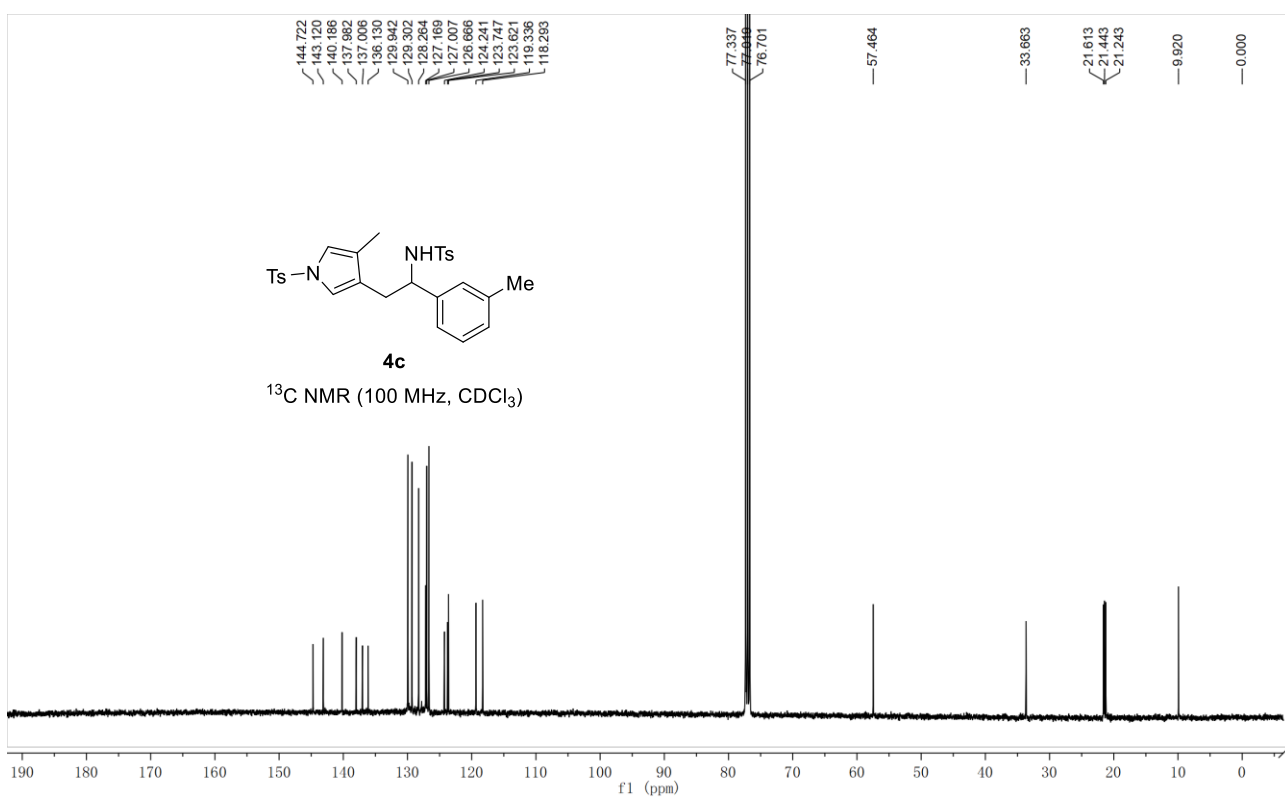



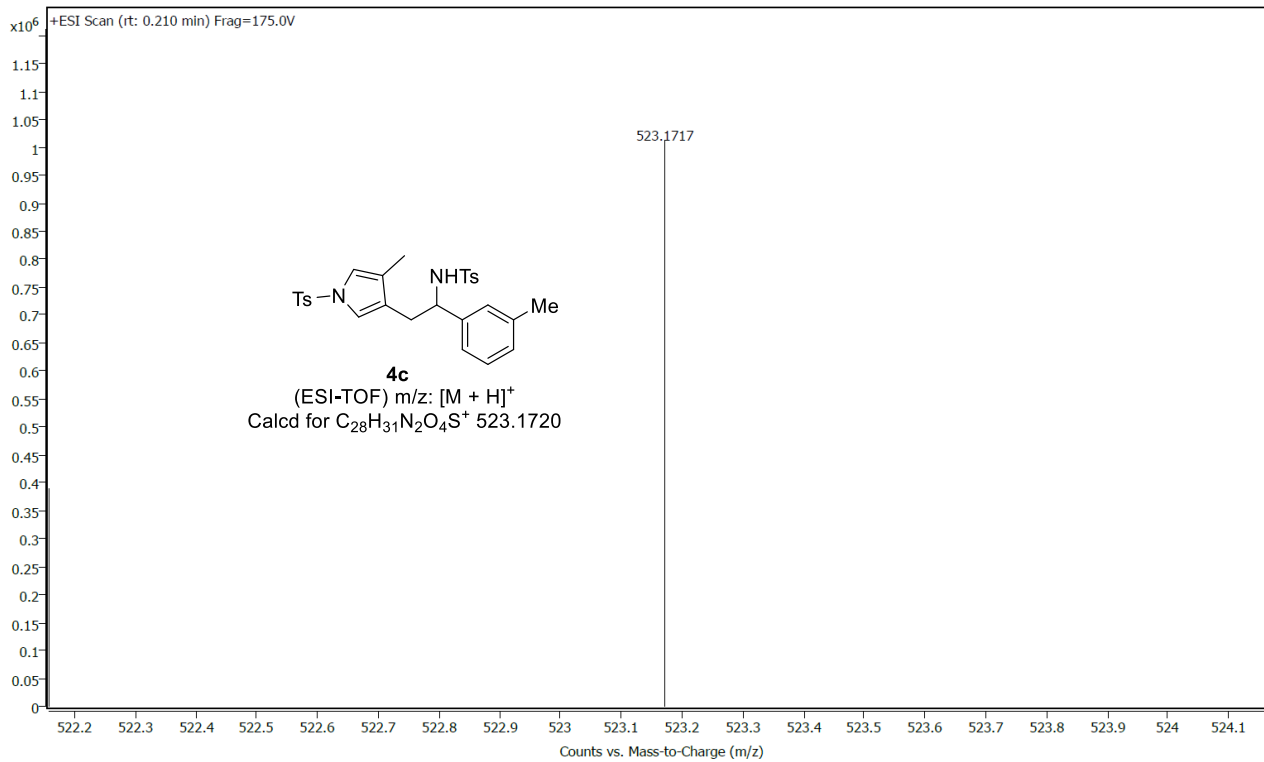

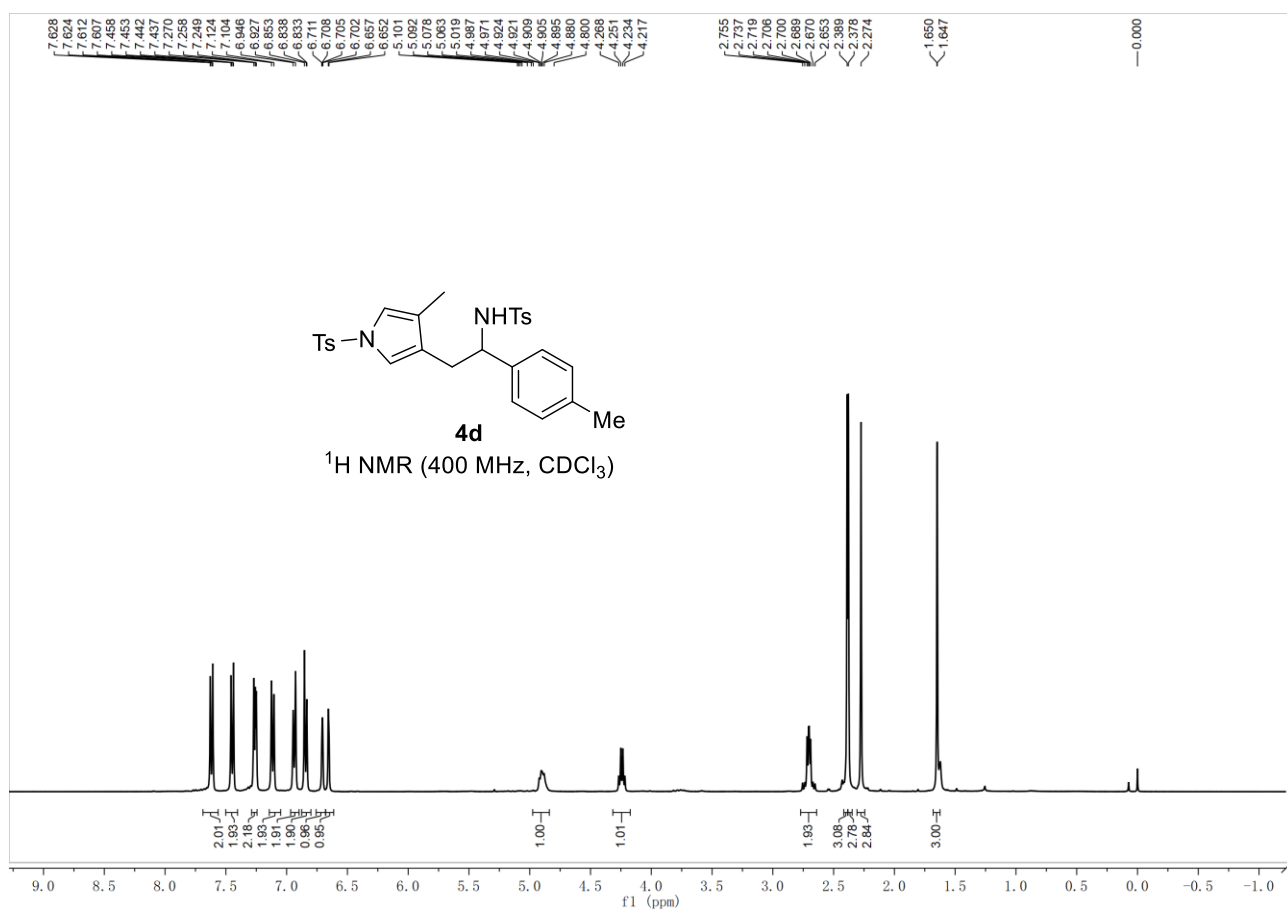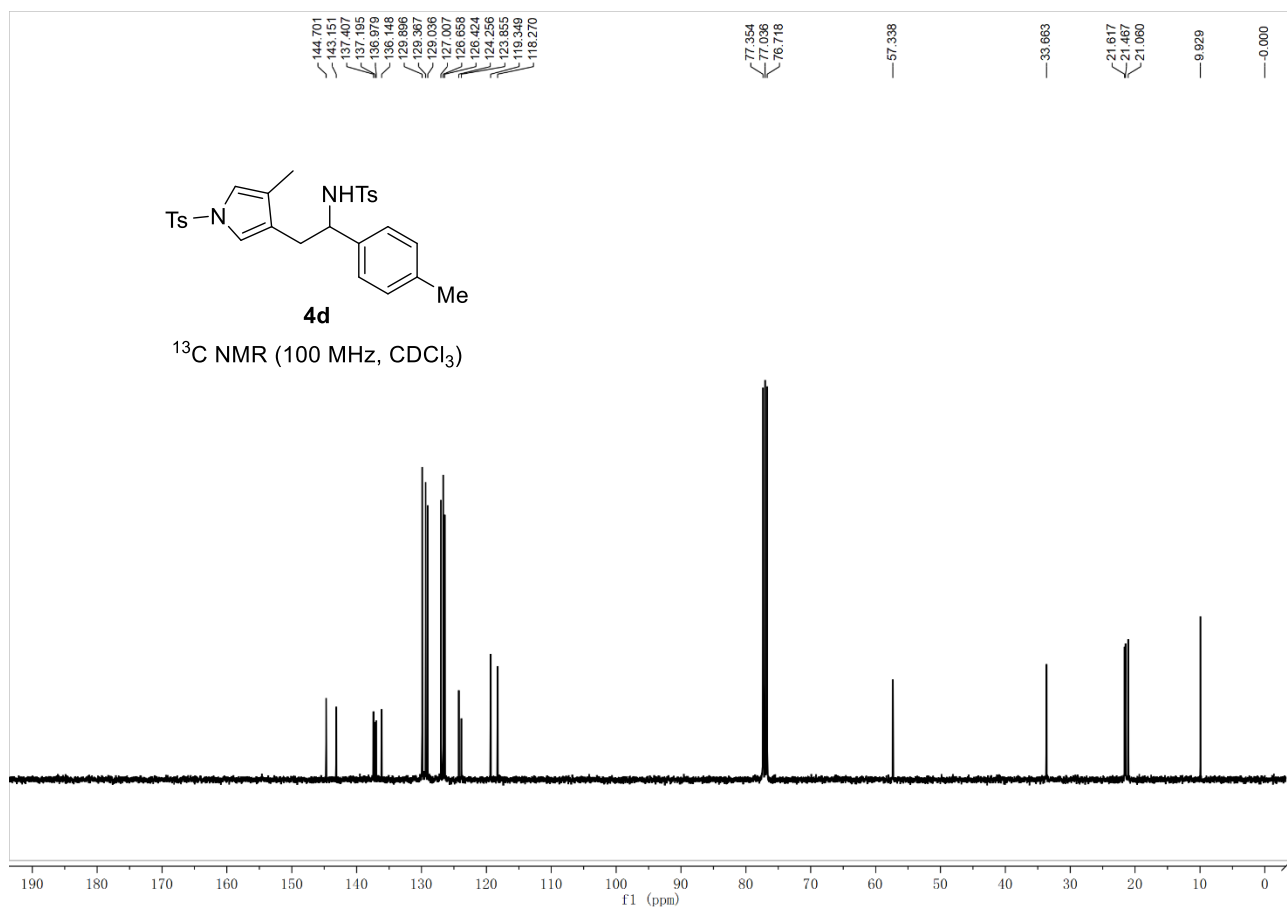

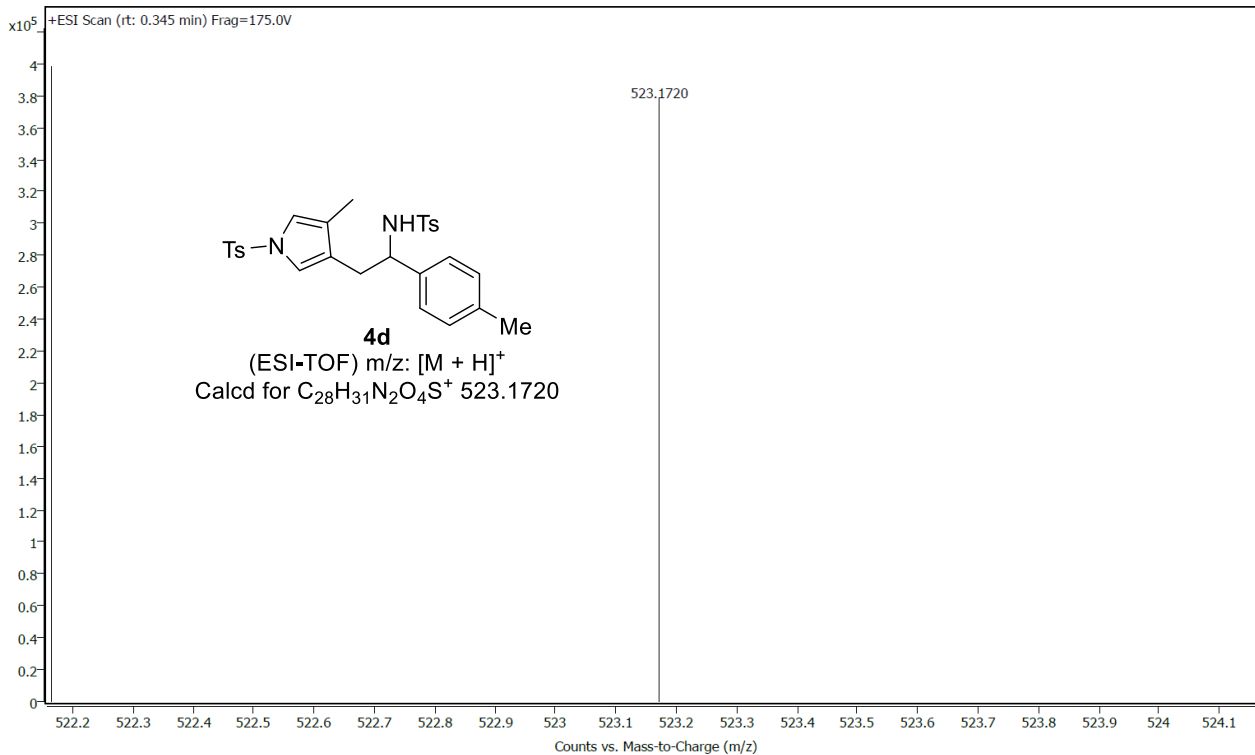

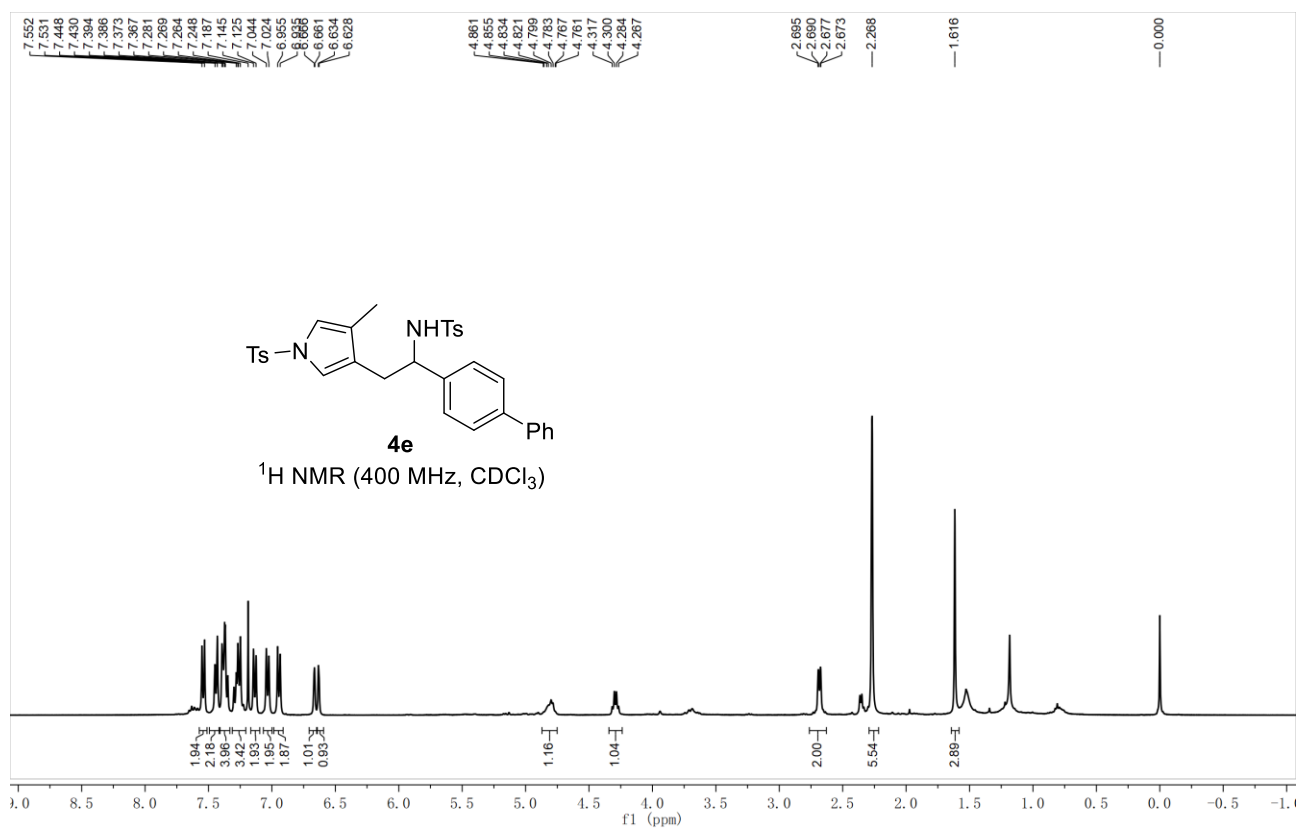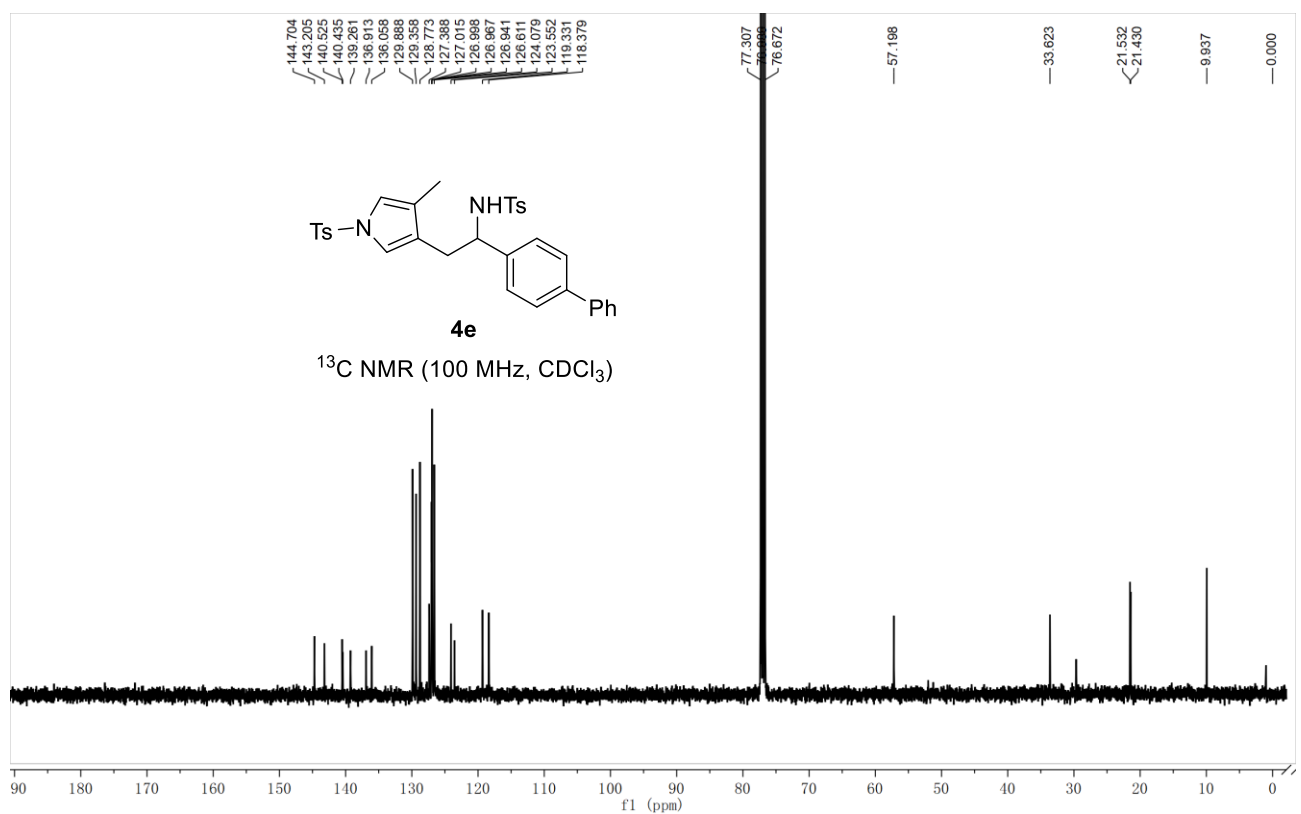

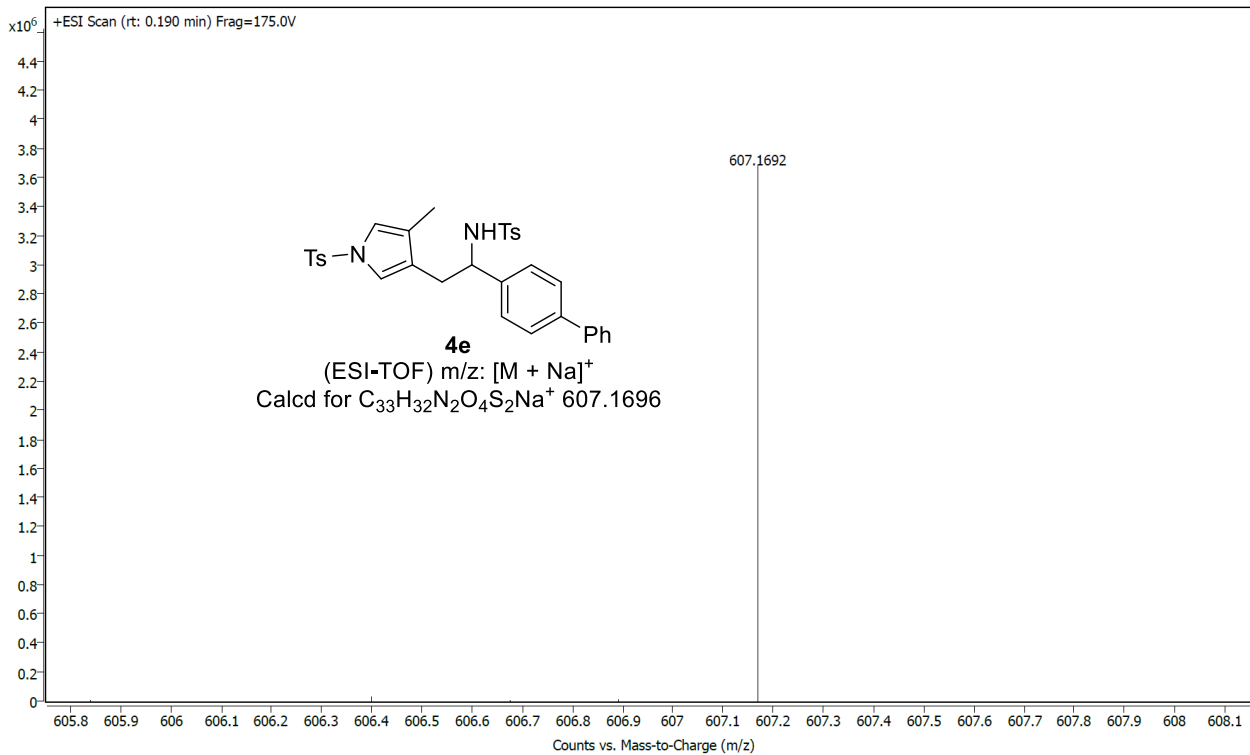

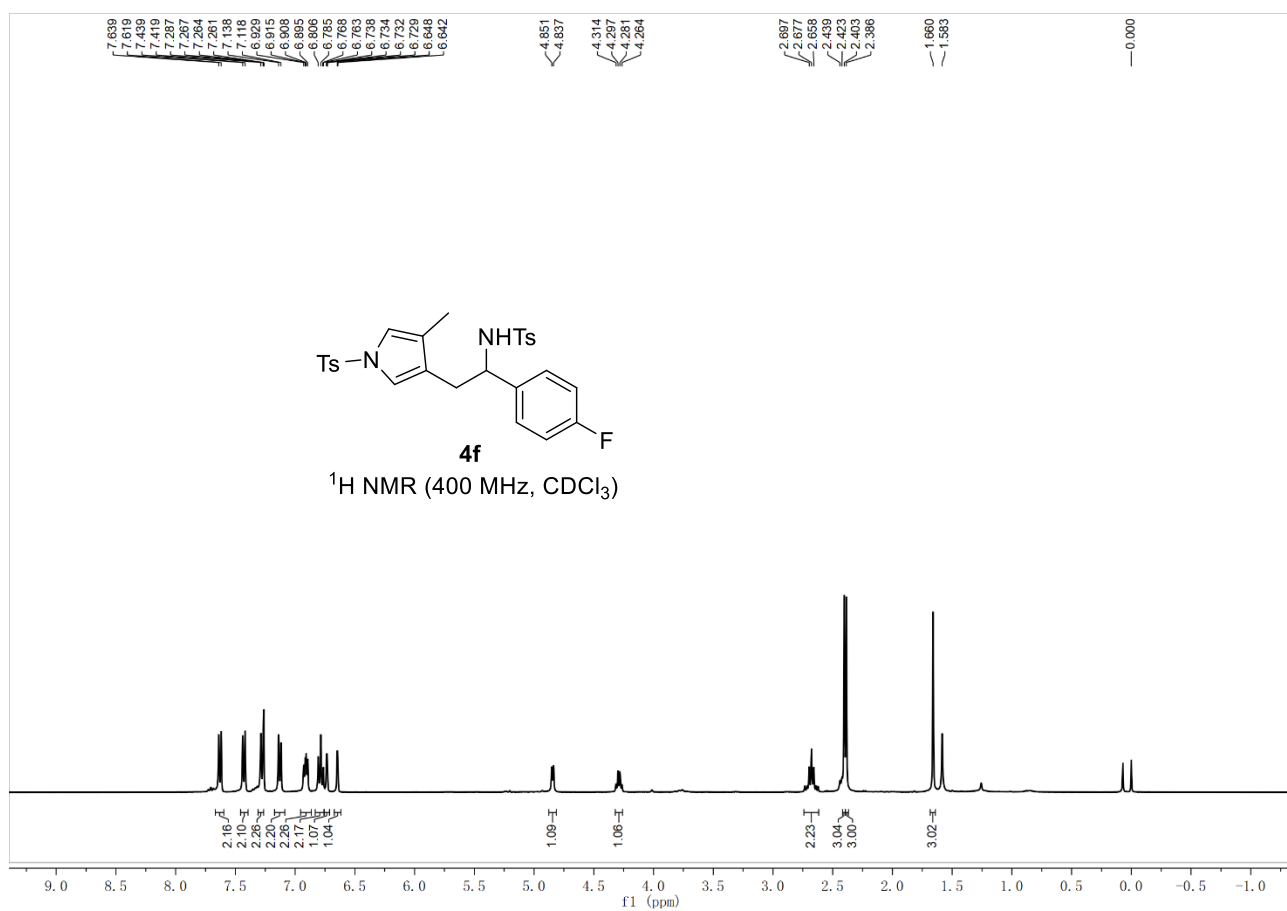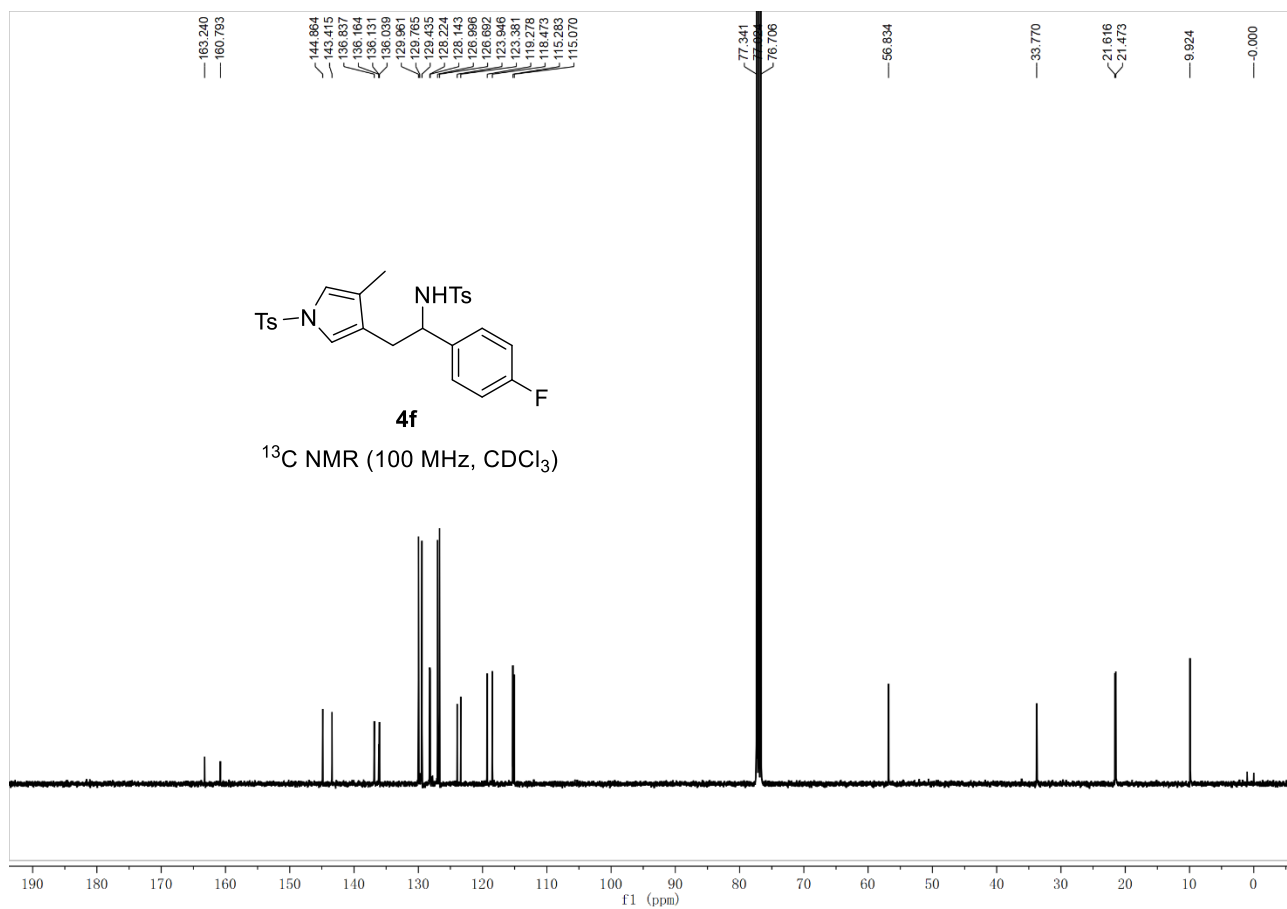

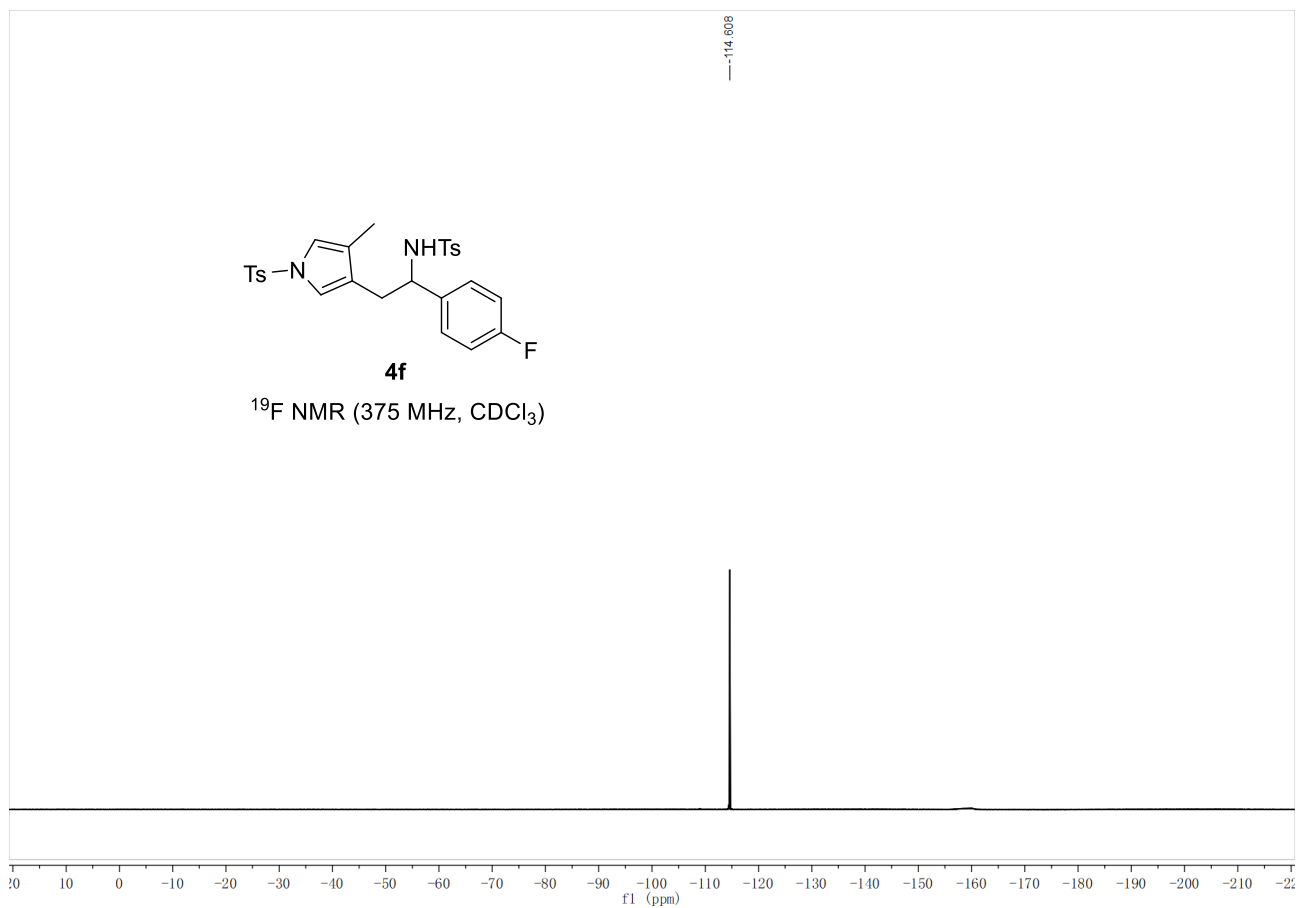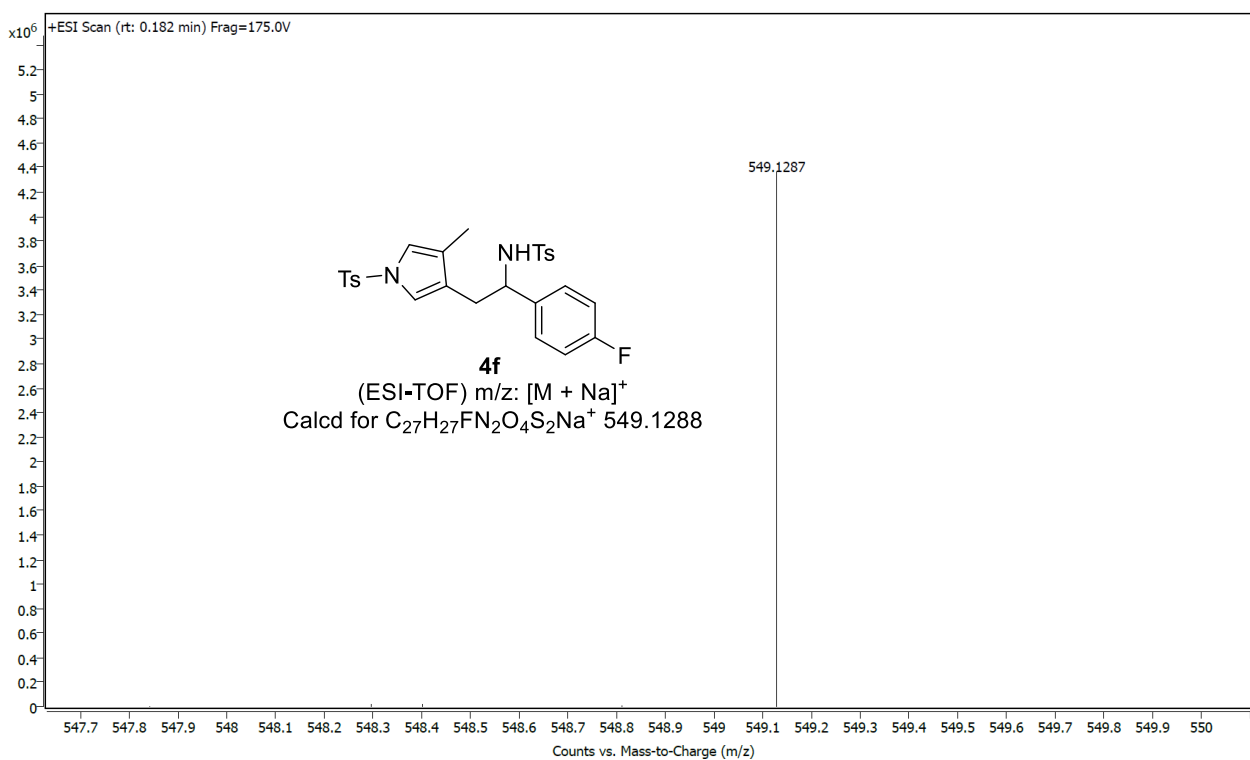

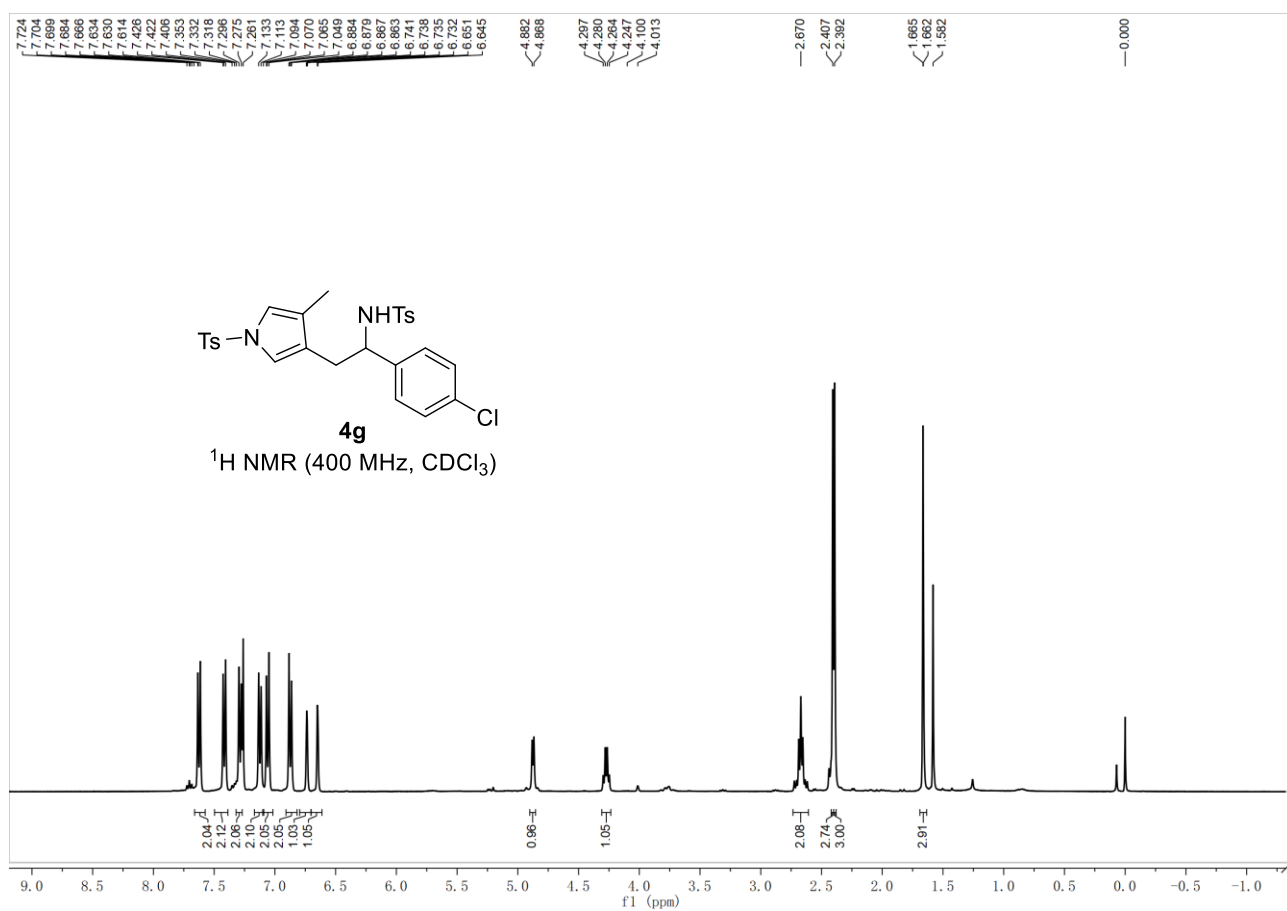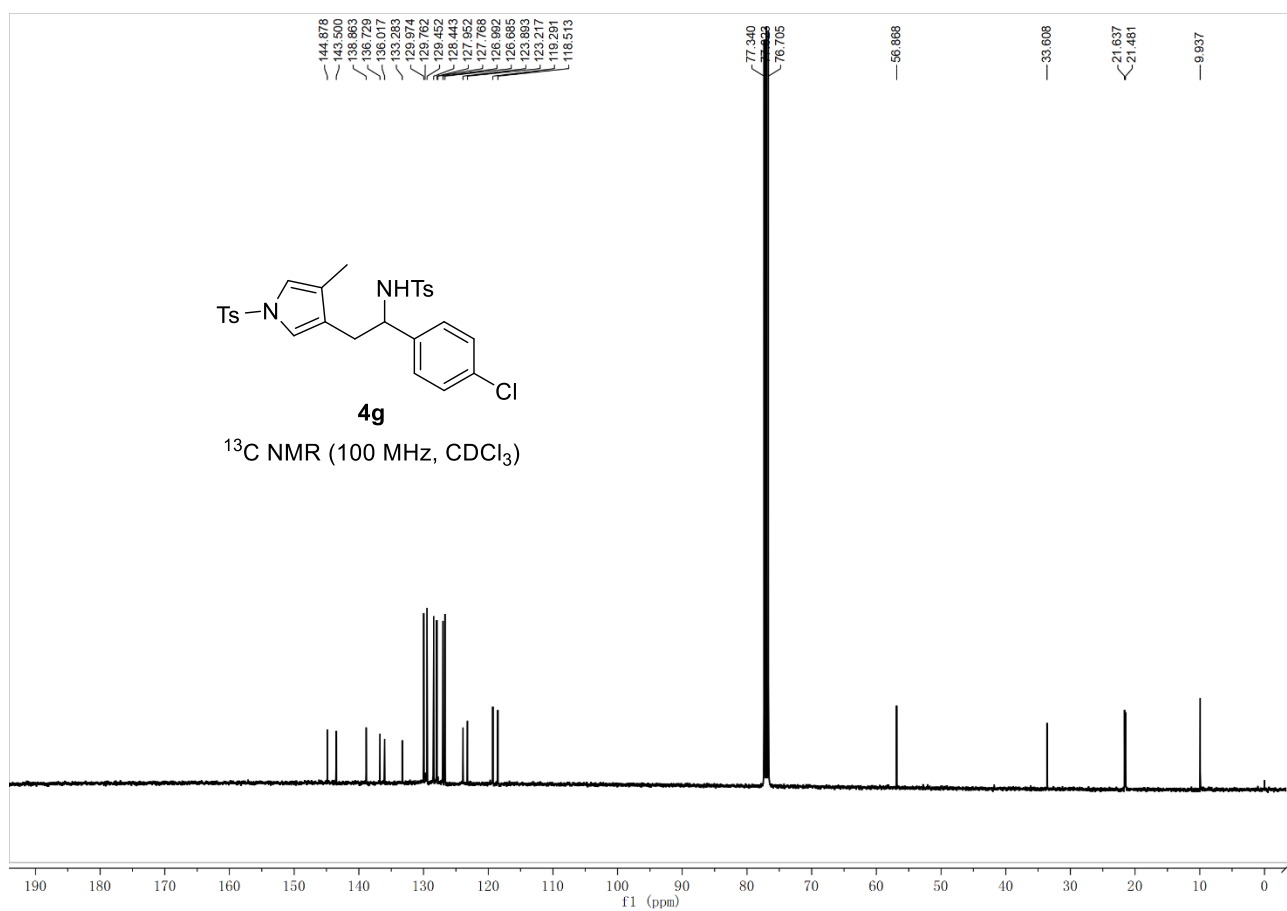



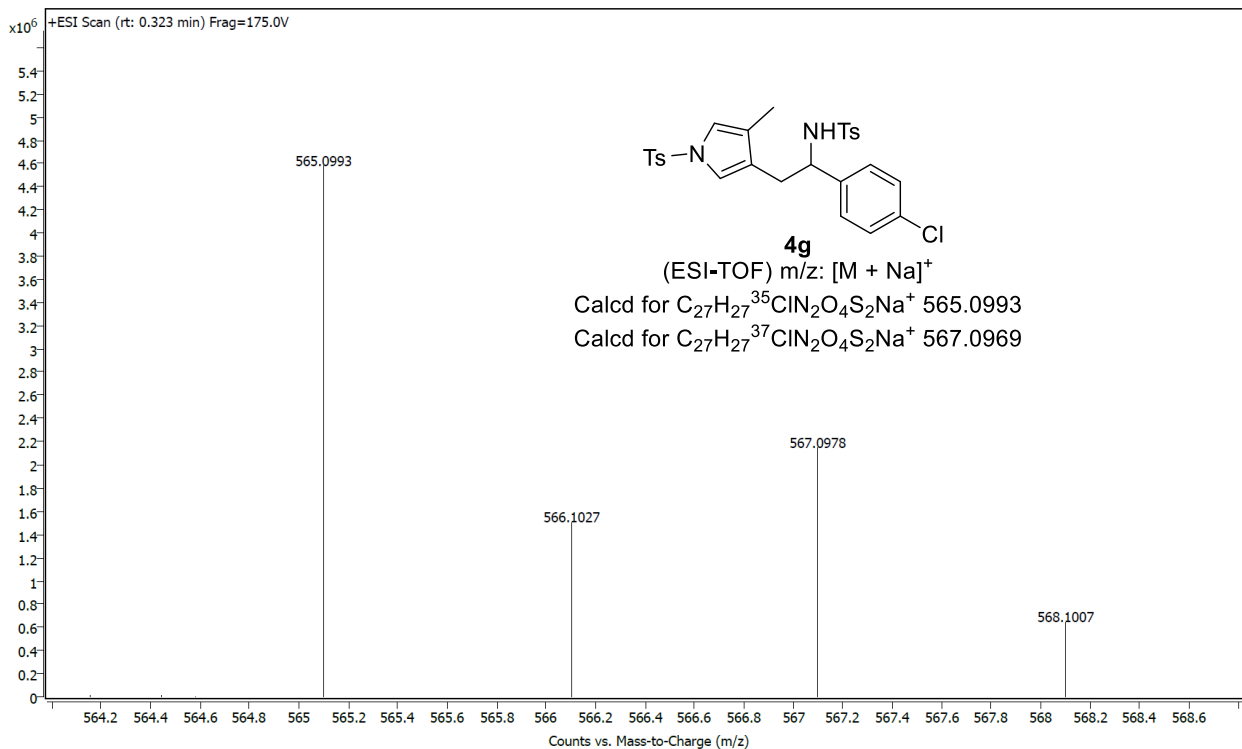

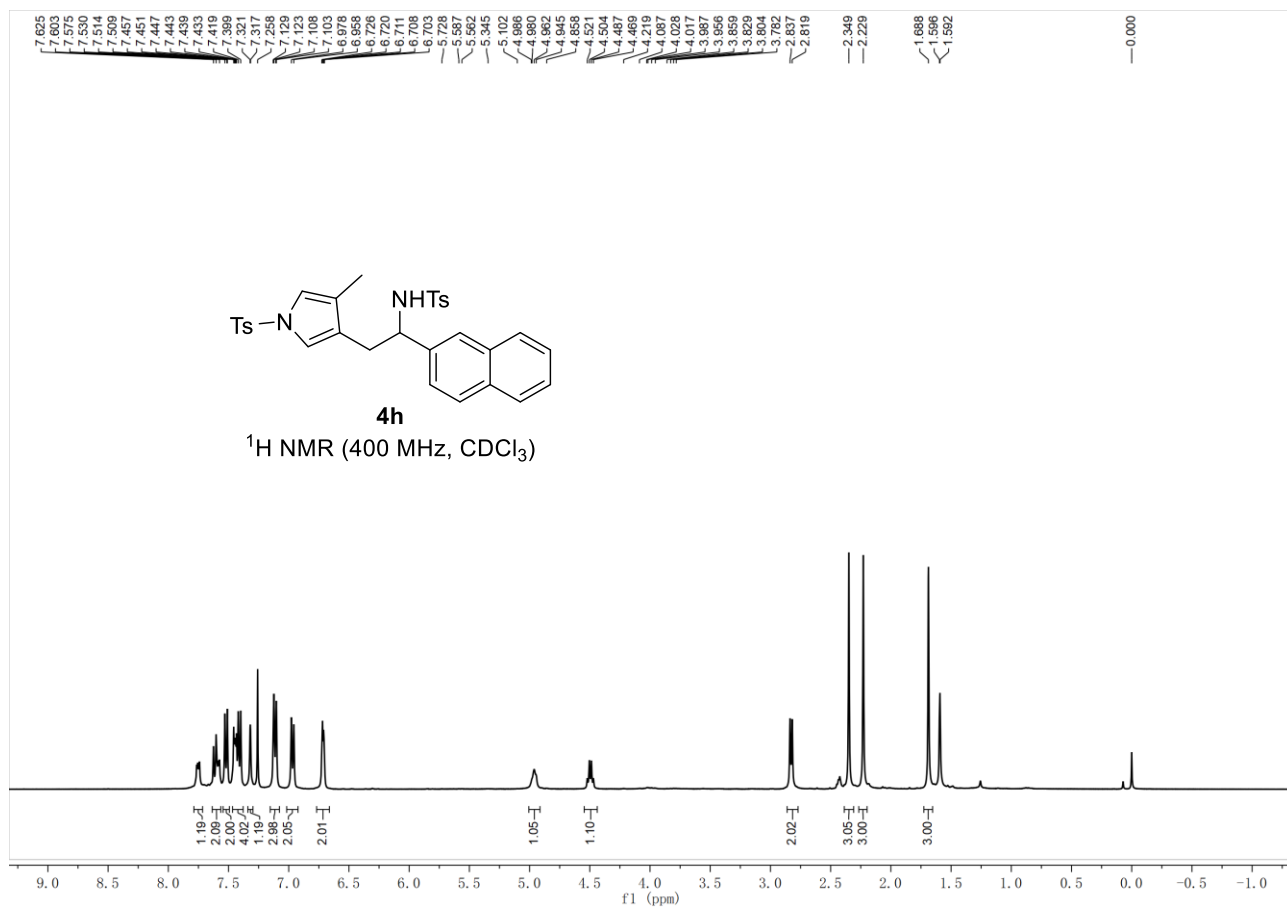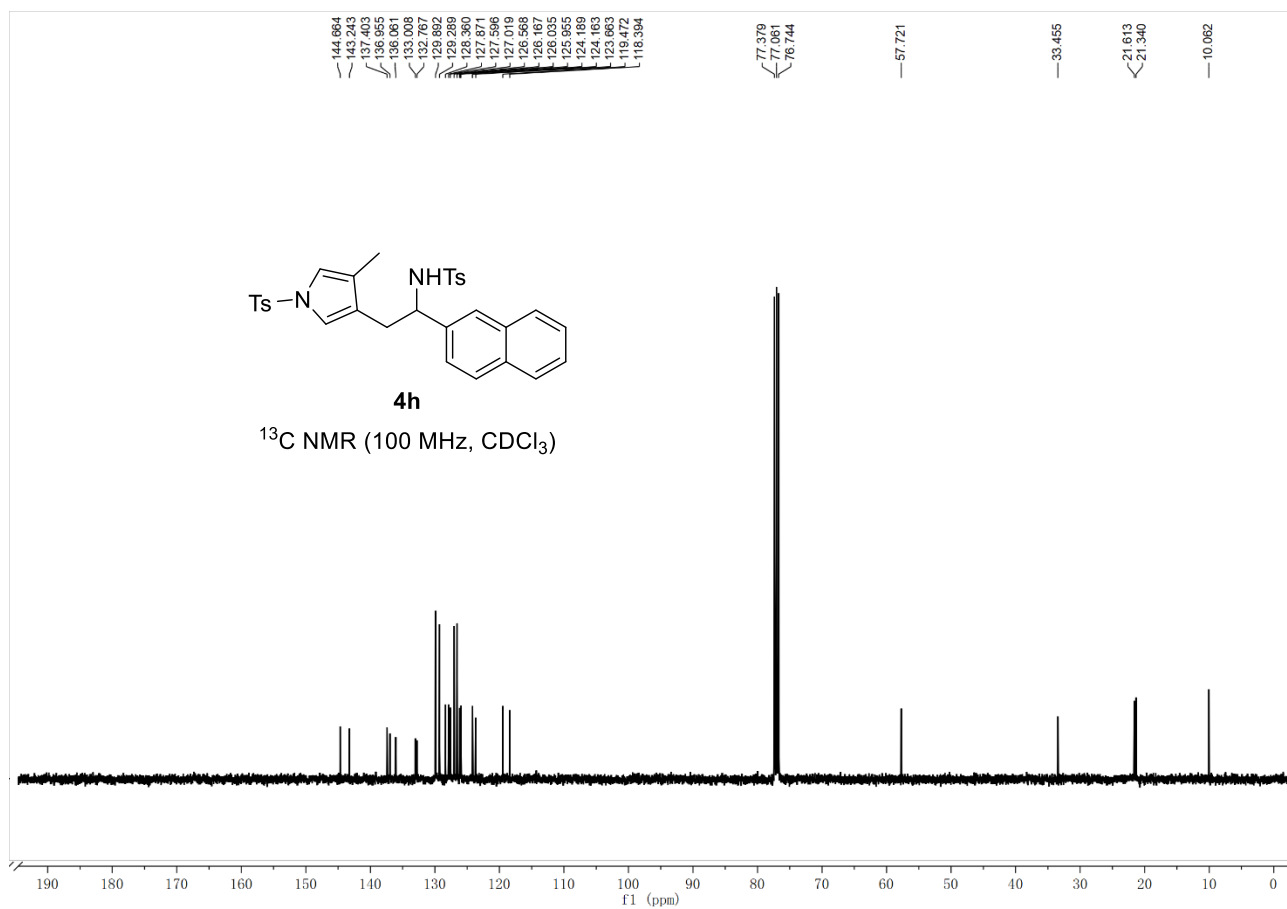

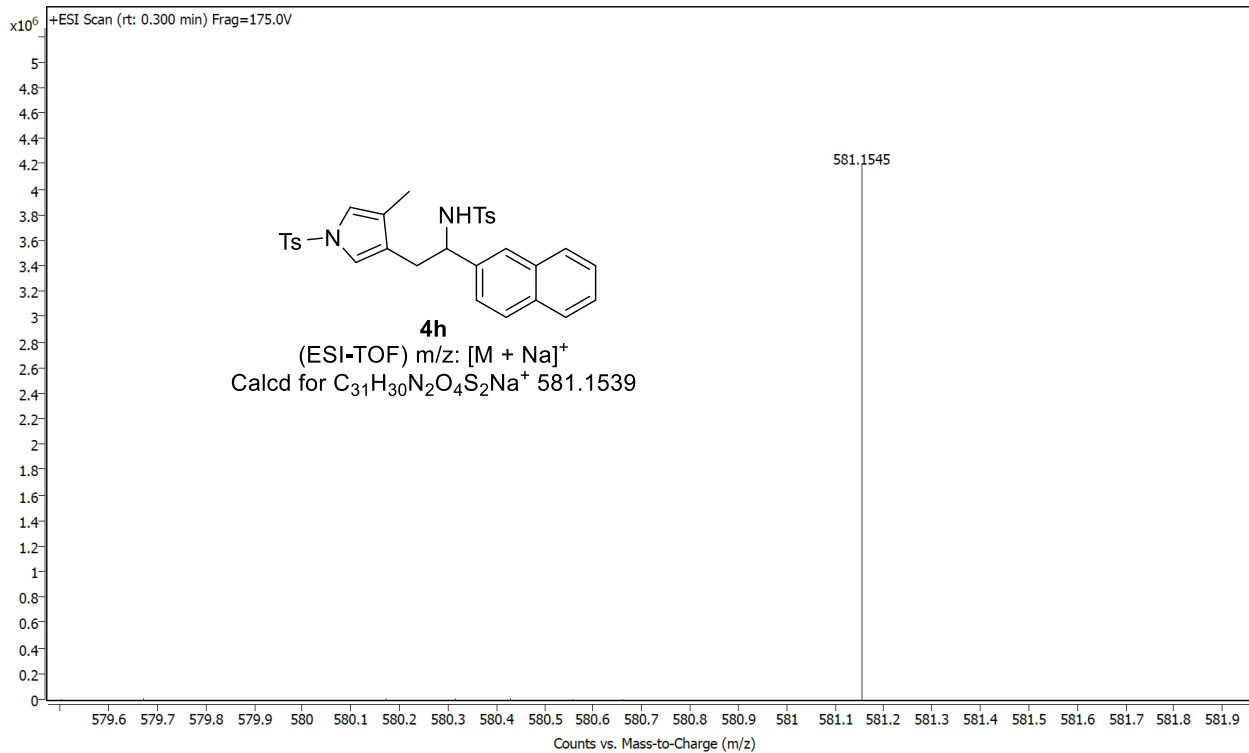

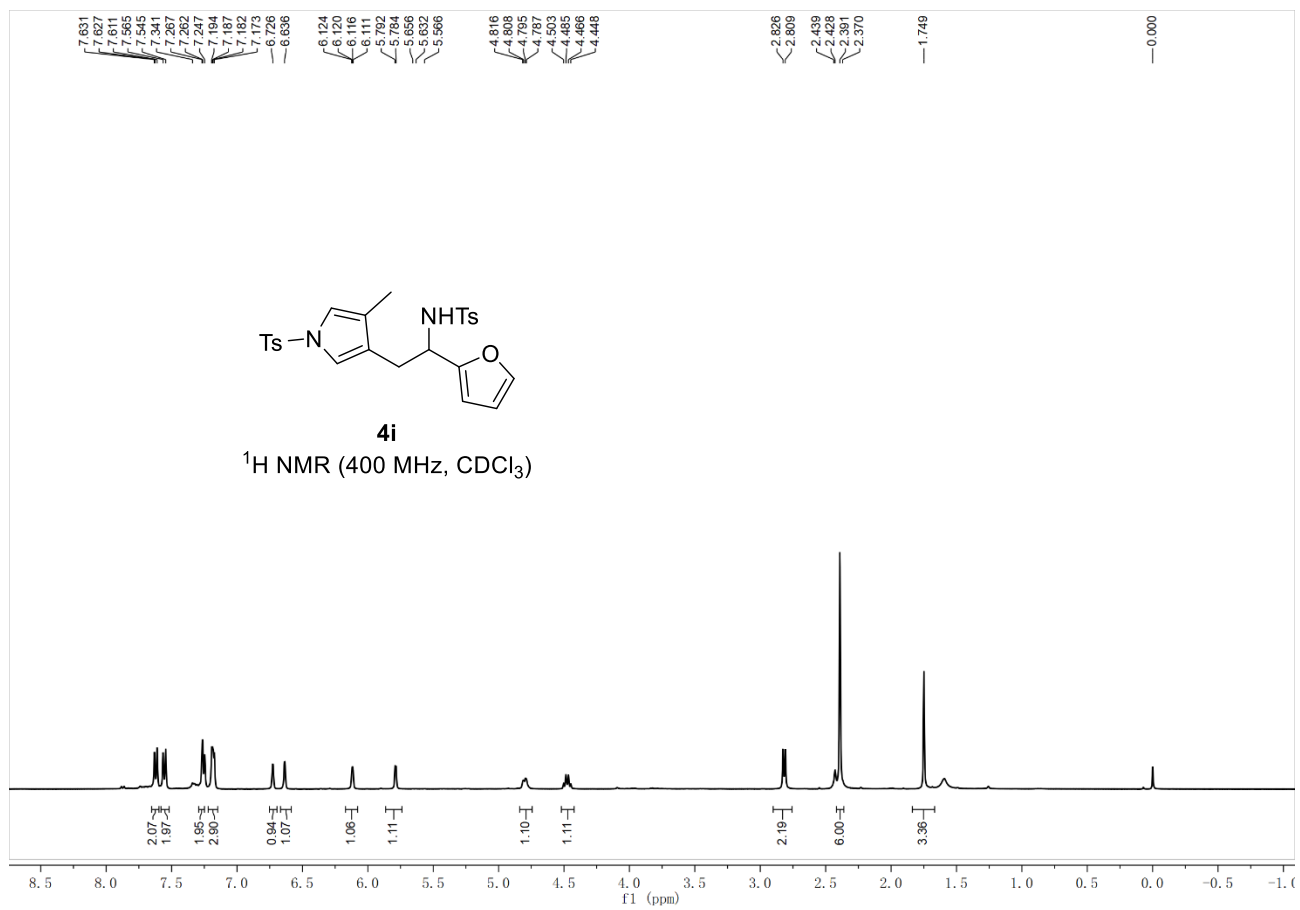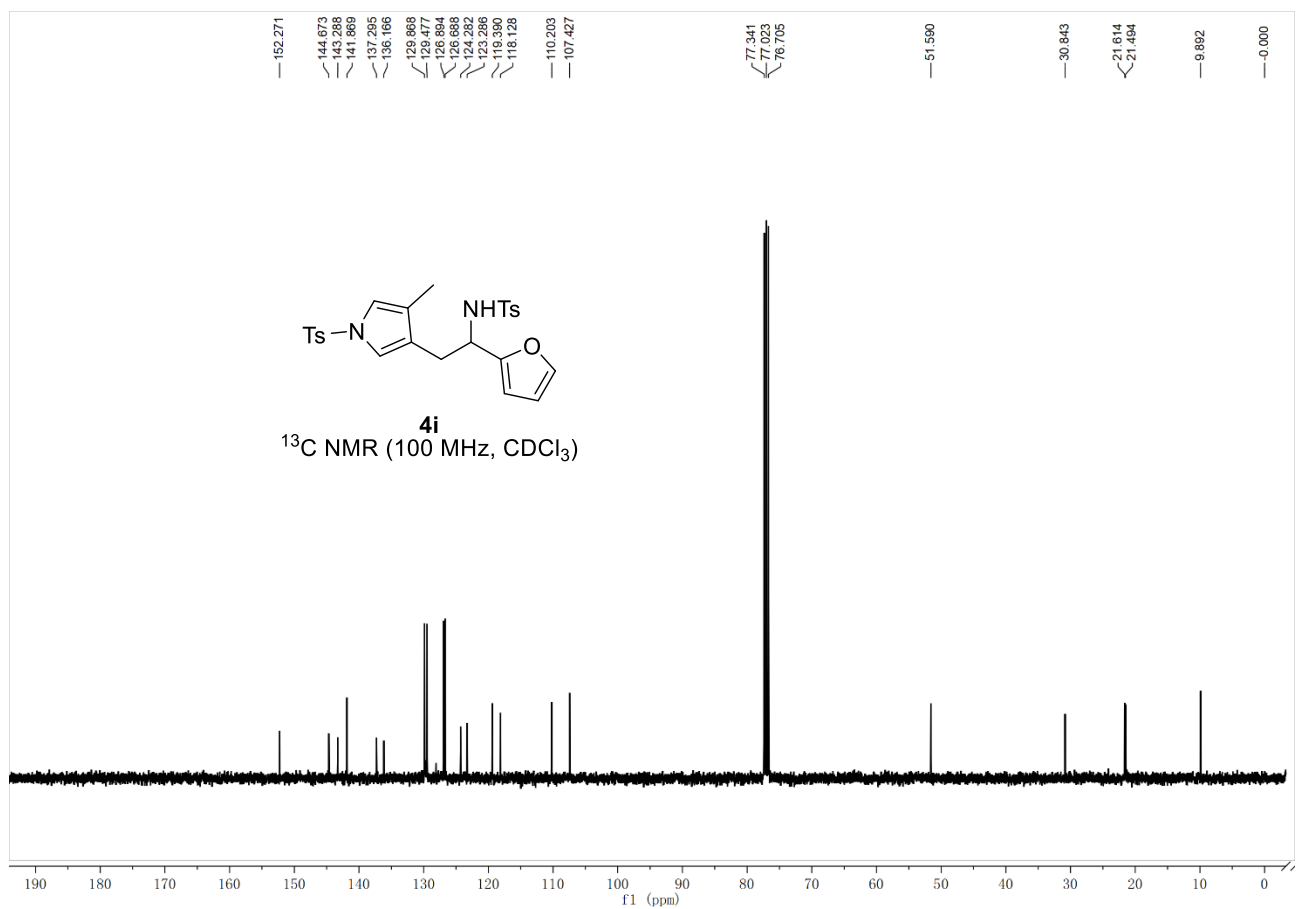

1: TOF MS ES+  
1.66e5

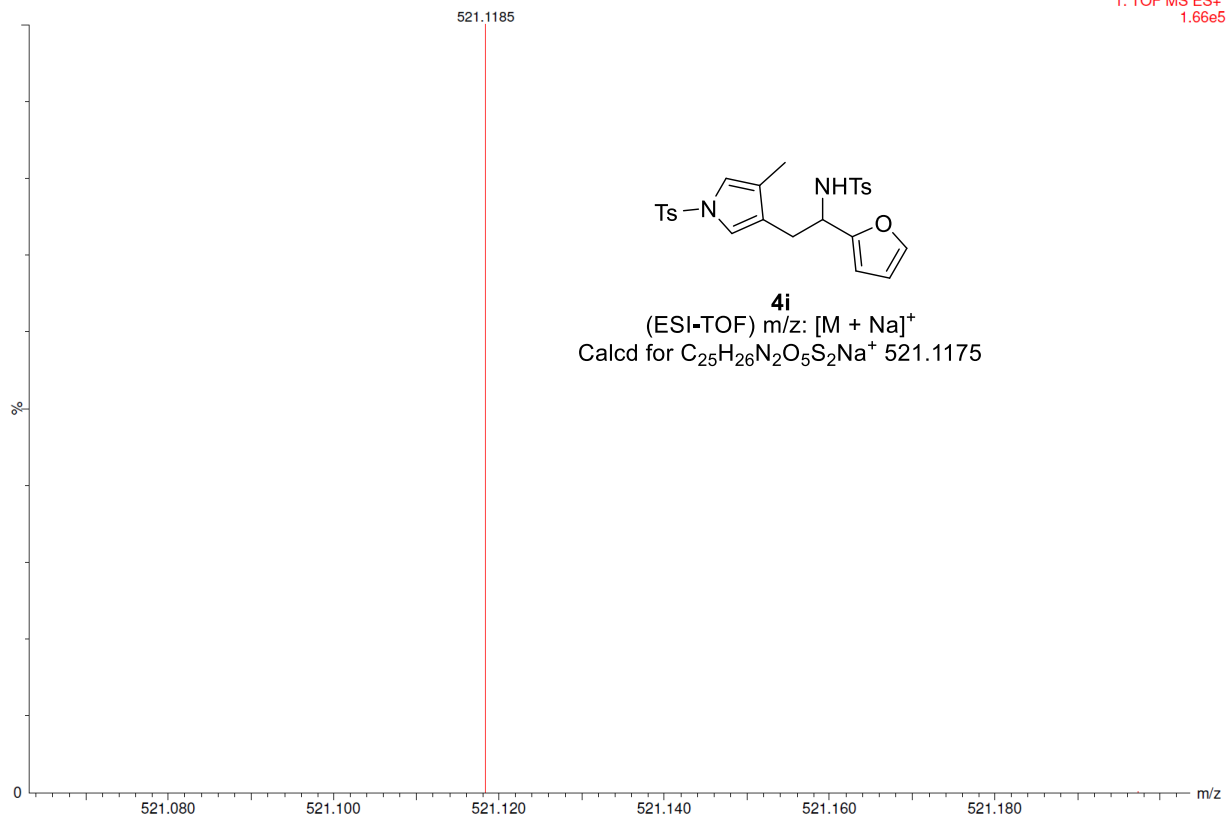

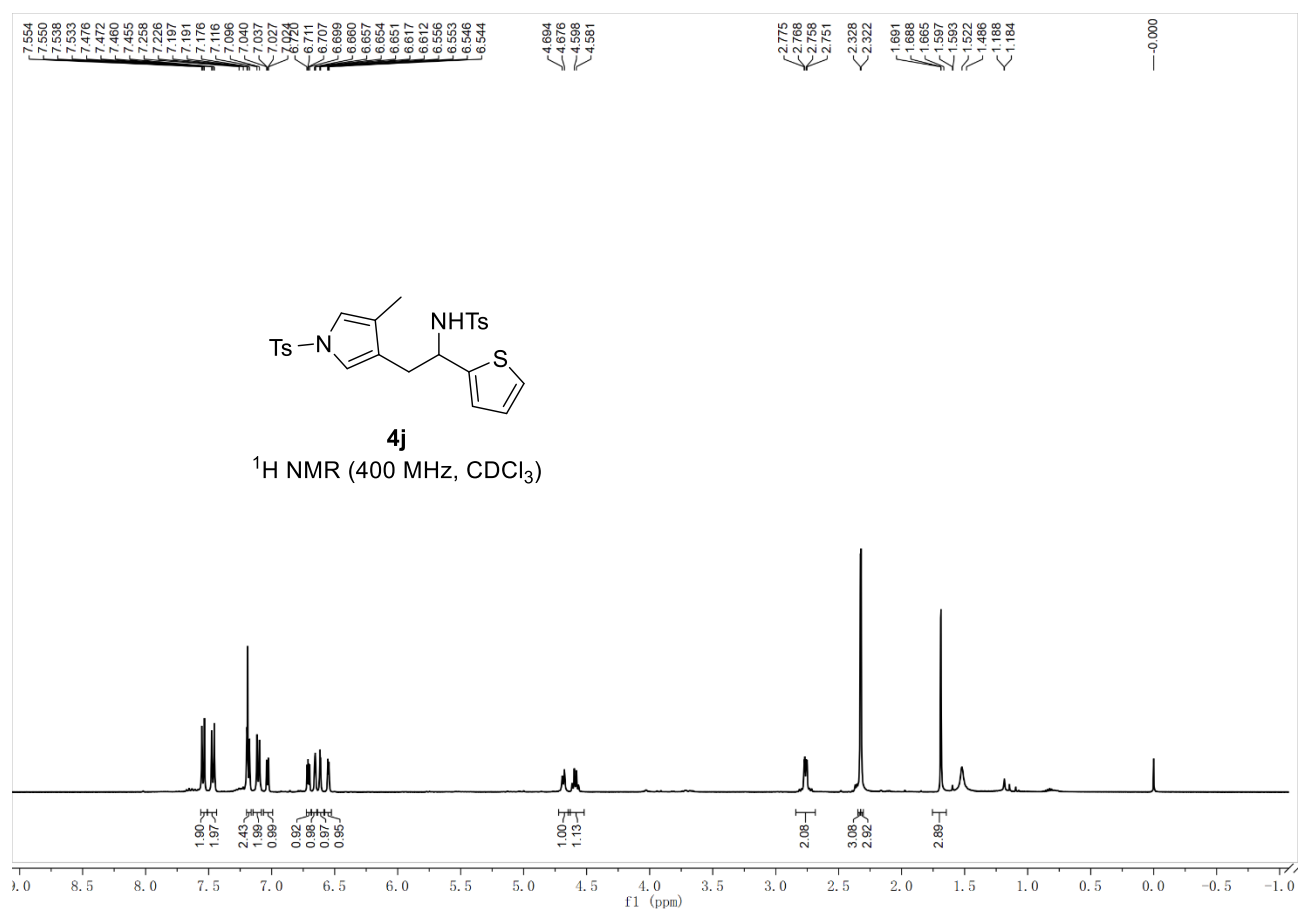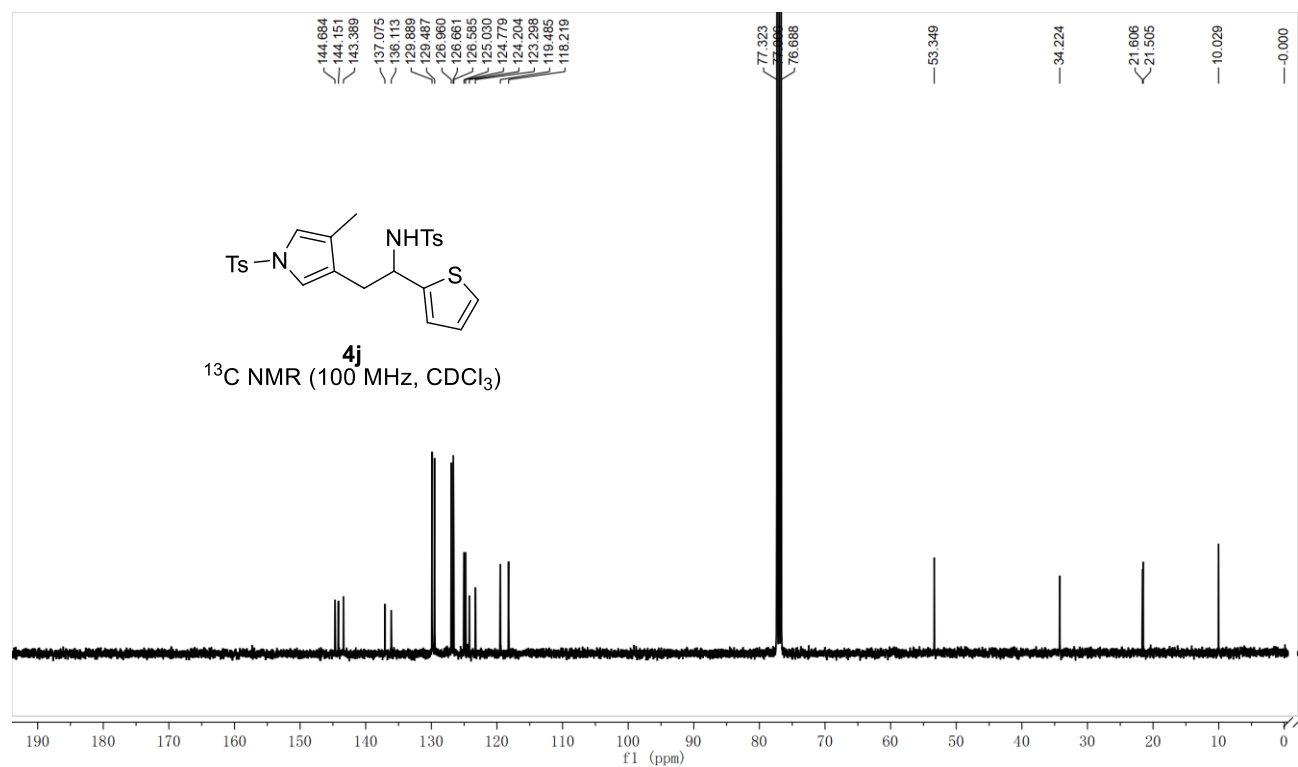

1: TOF MS ES+  
2.77e4

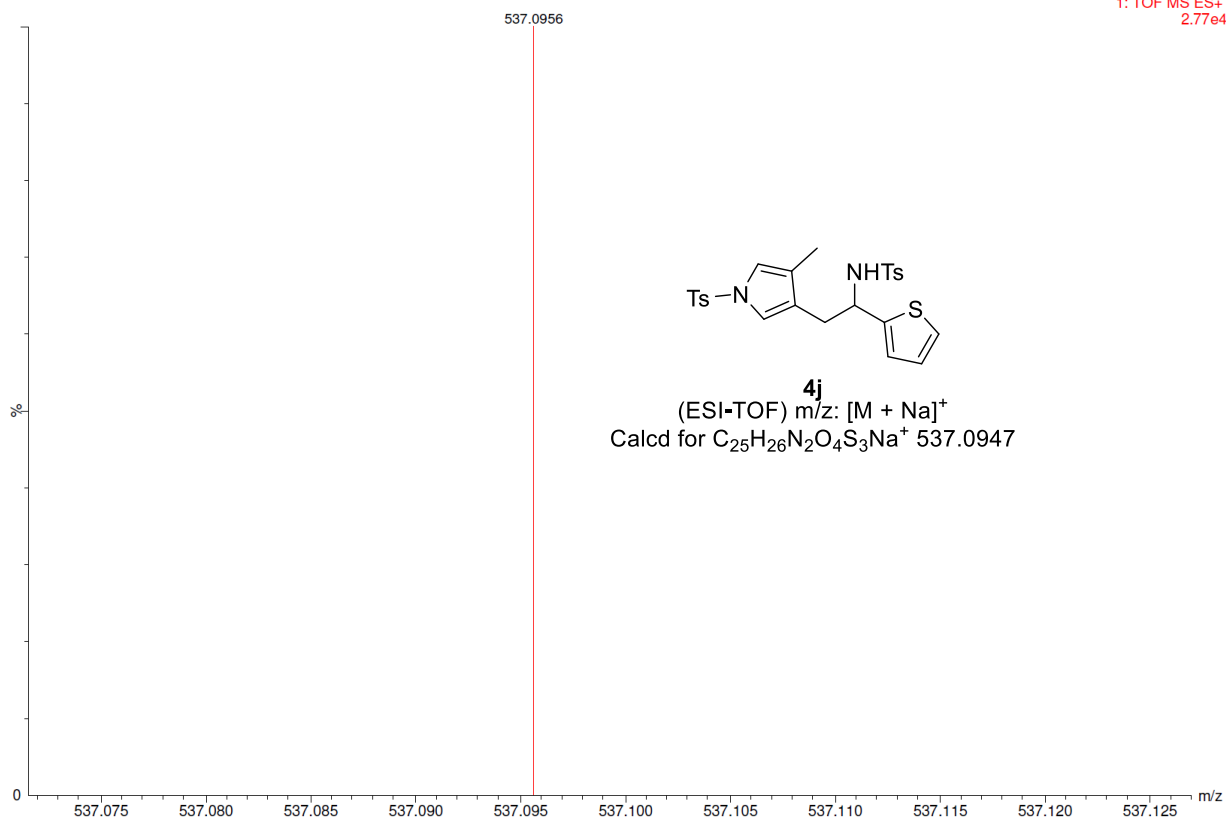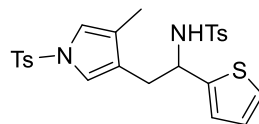

**4j**  
(ESI-TOF) m/z: [M + Na]<sup>+</sup>  
Calcd for C<sub>25</sub>H<sub>26</sub>N<sub>2</sub>O<sub>4</sub>S<sub>3</sub>Na<sup>+</sup> 537.0947

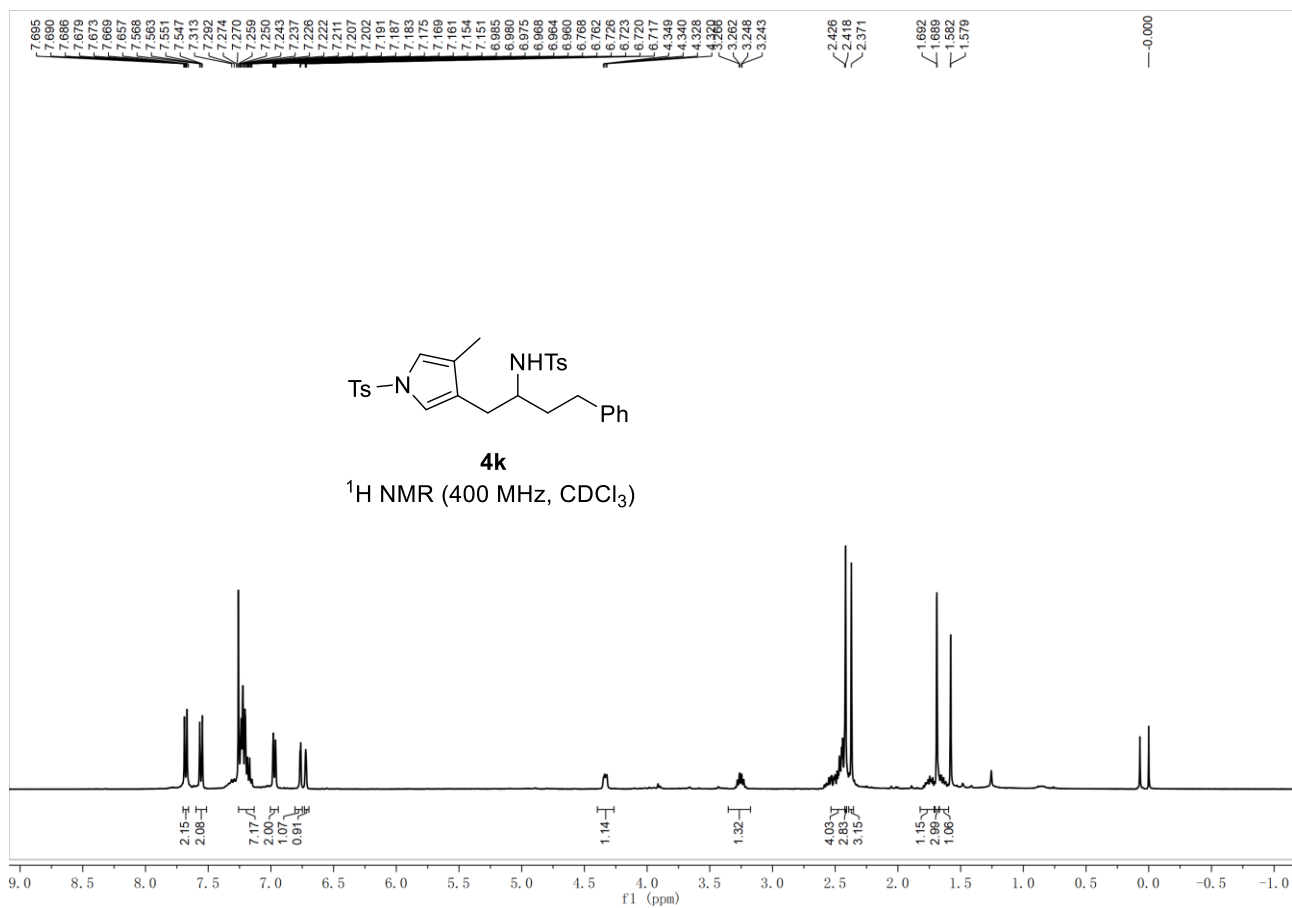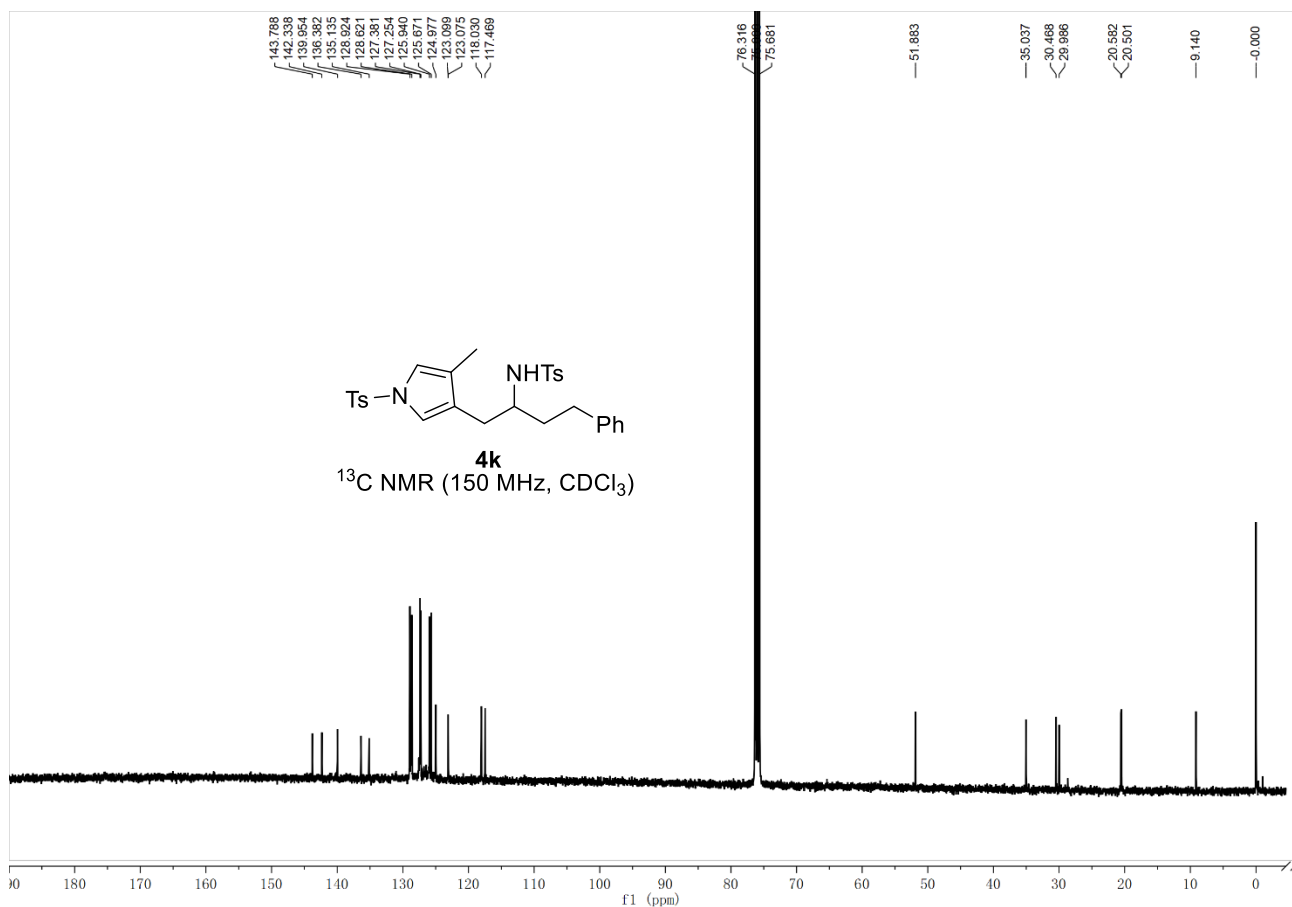



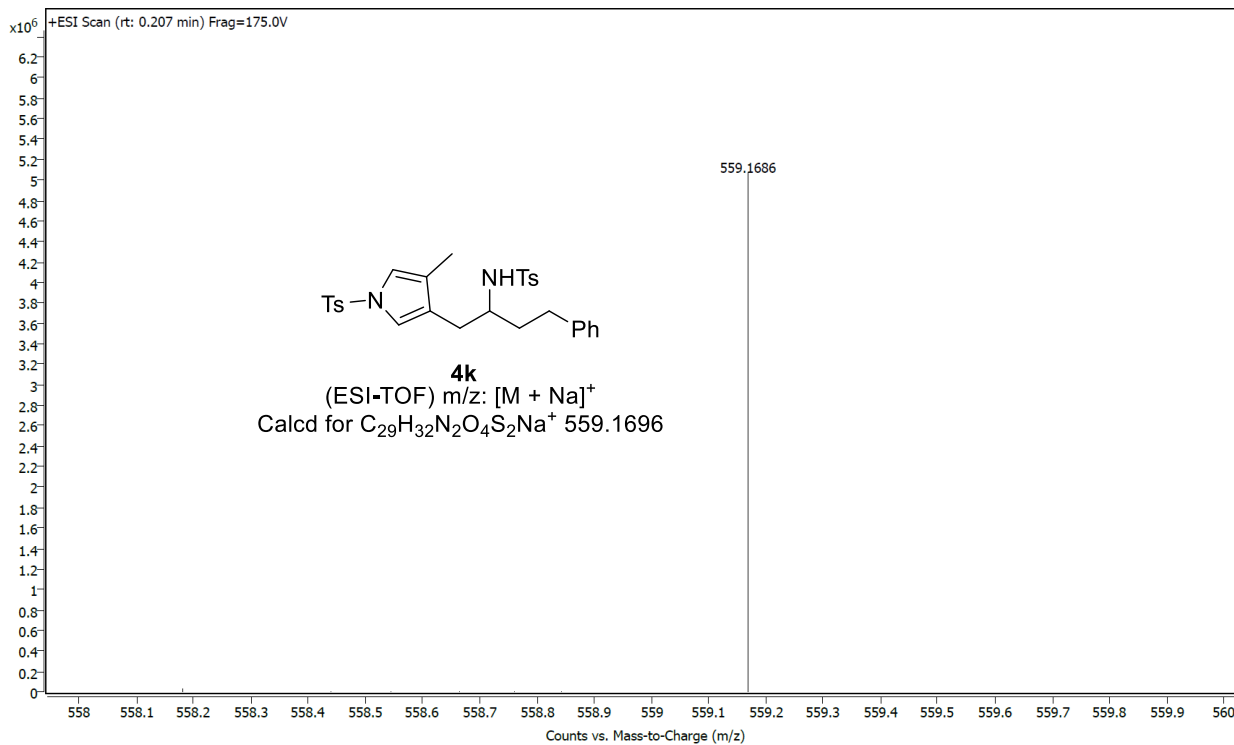

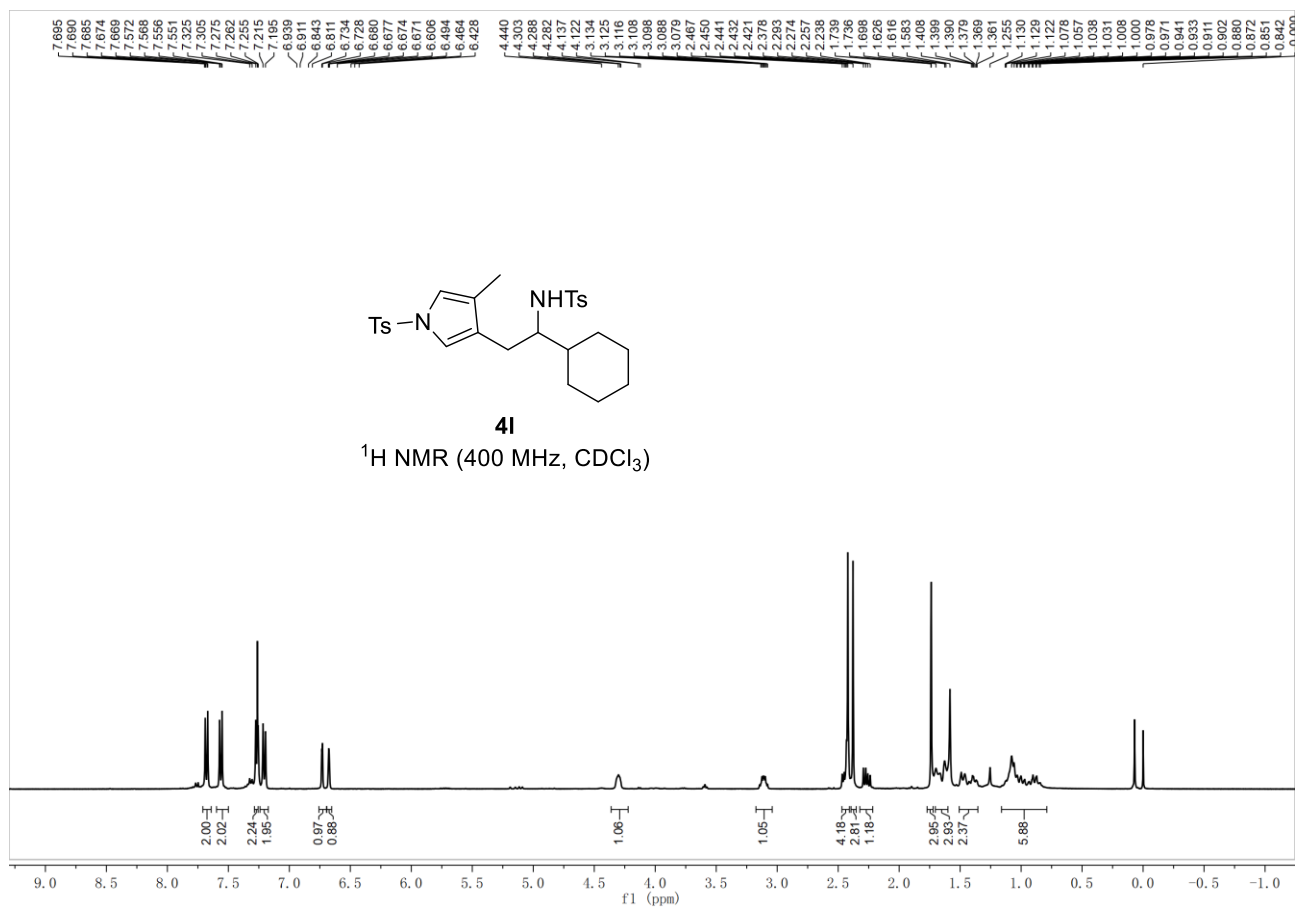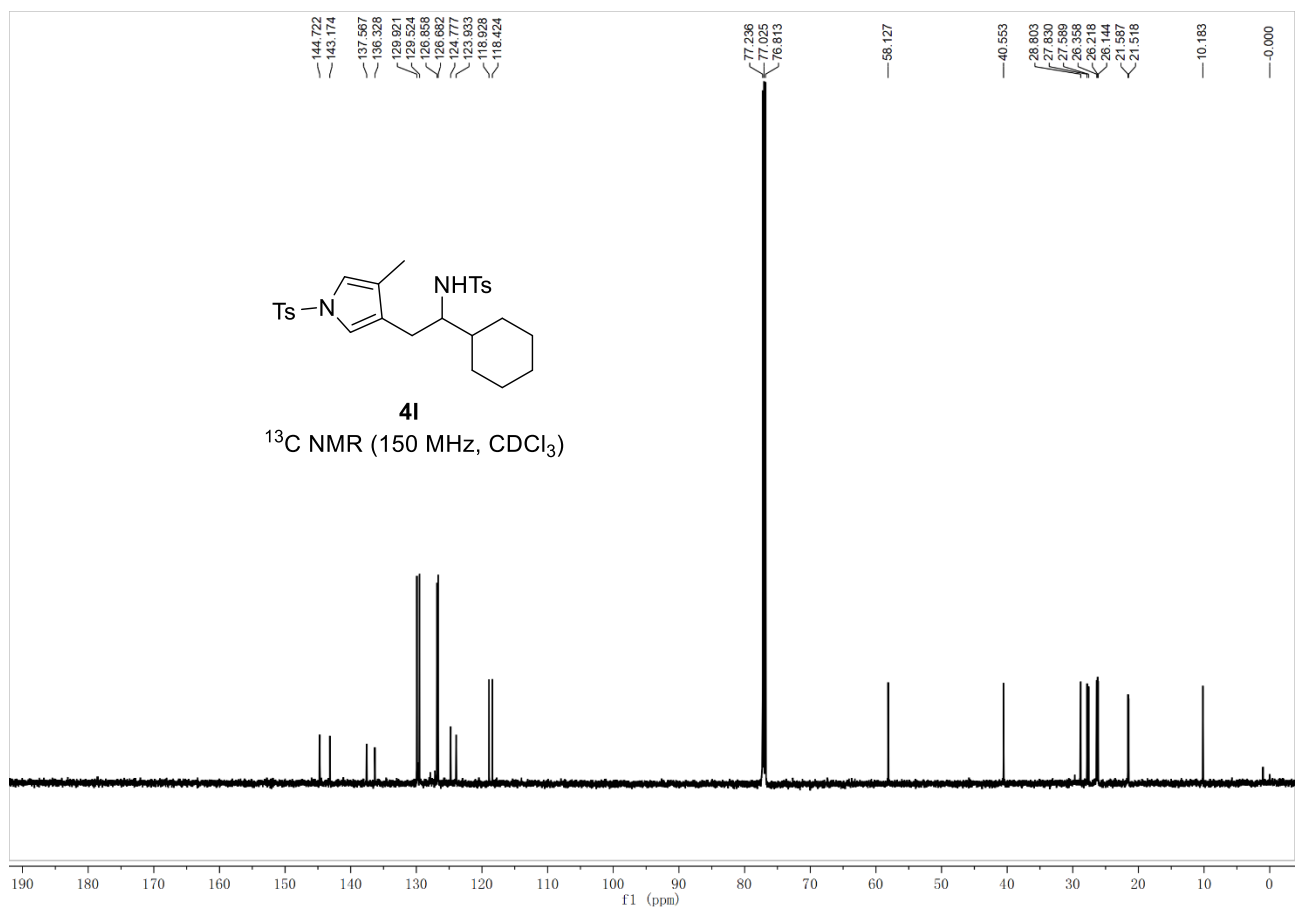

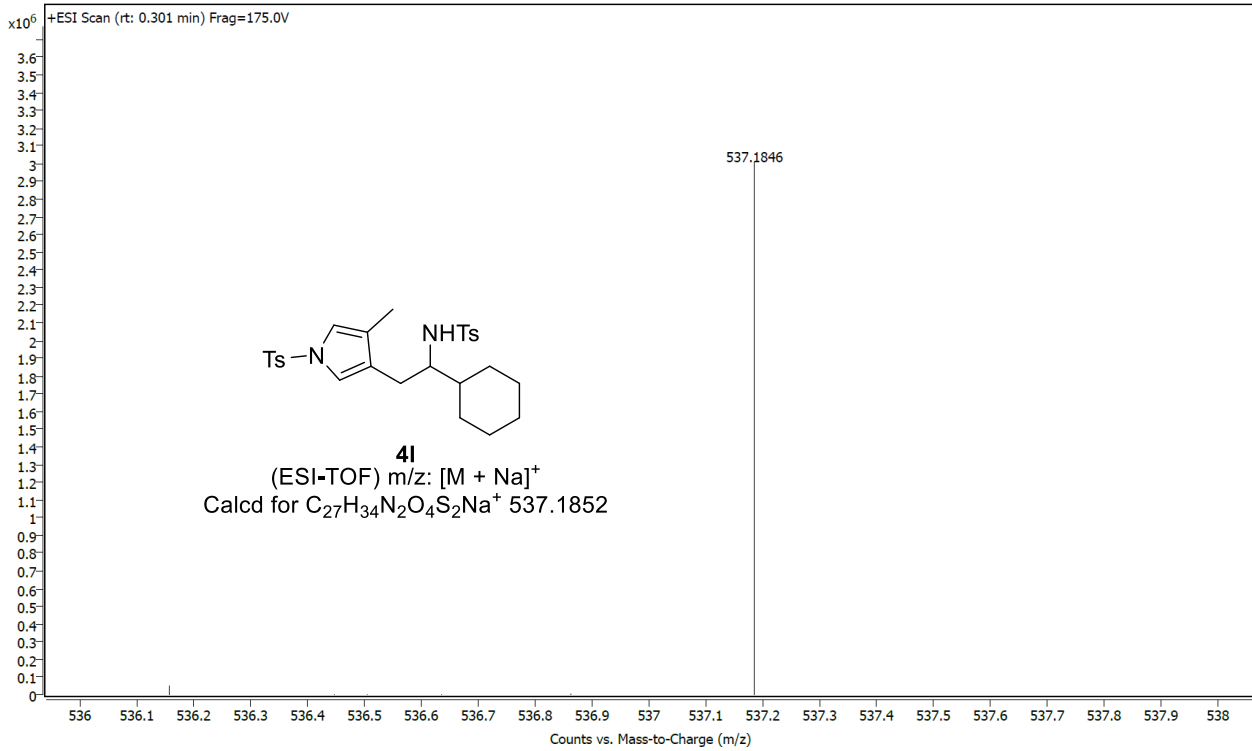

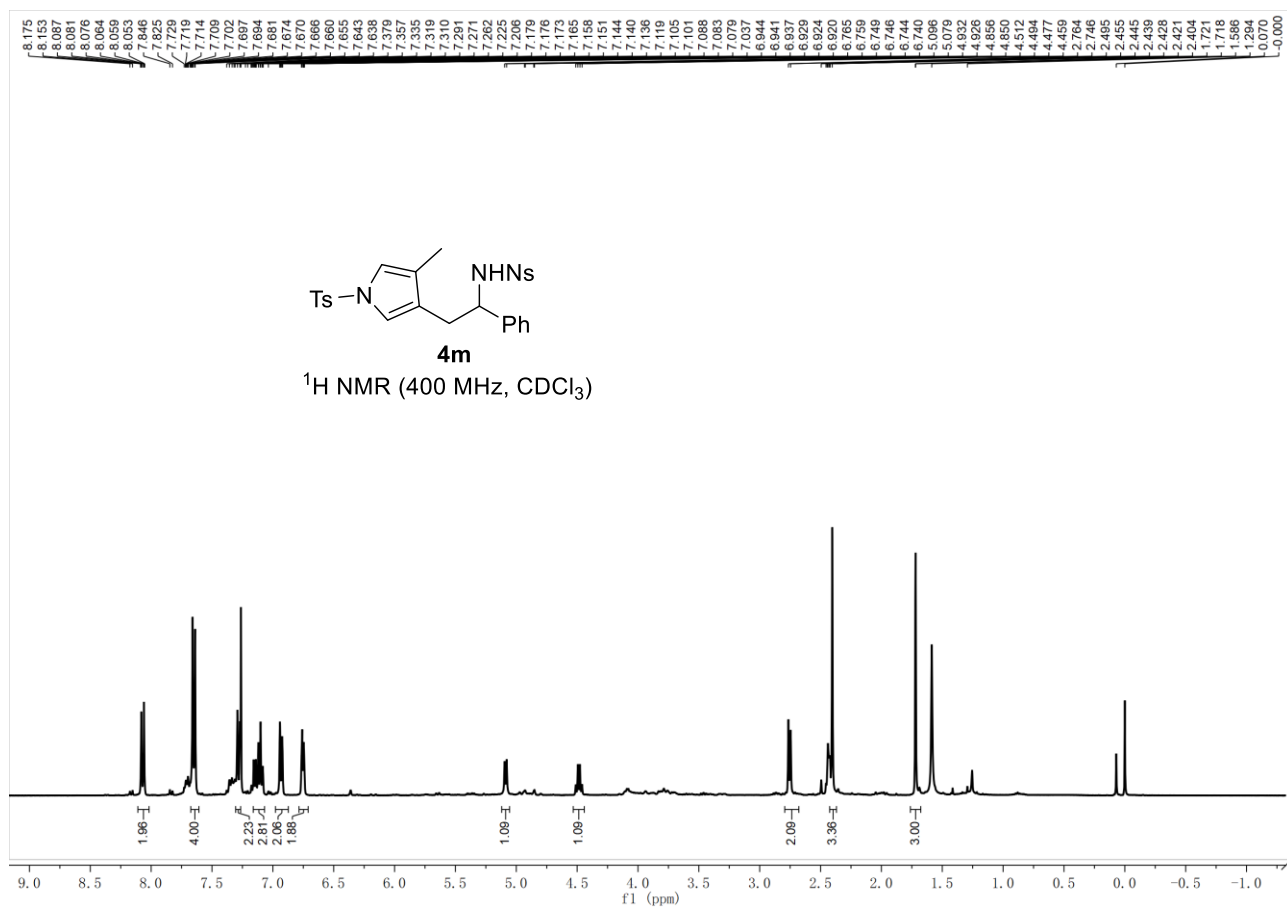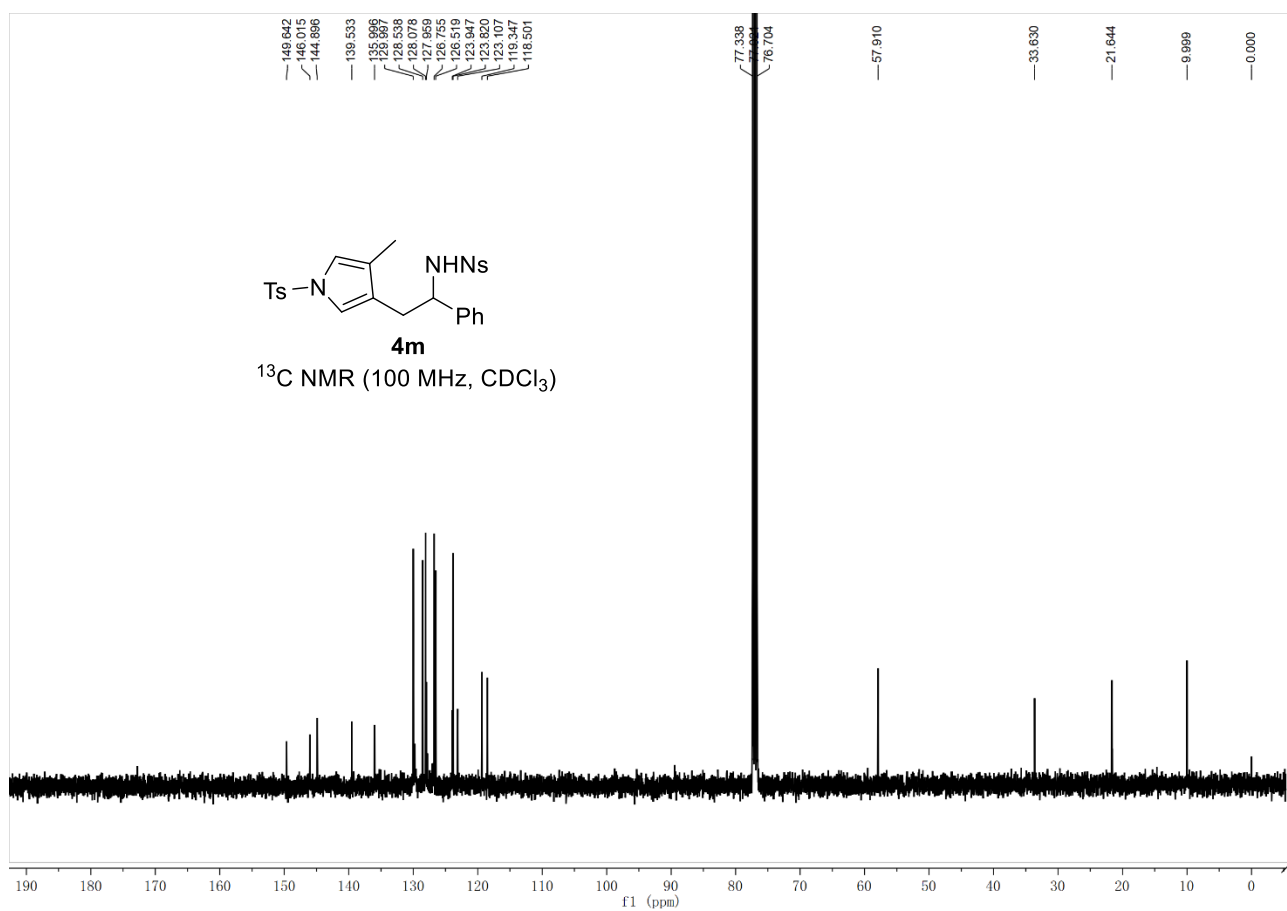

Spectrum from 20220820.wiff2 (sample 3) - 3, +TOF MS (300 - 600) from 0.061 to 0.086 min, centroided

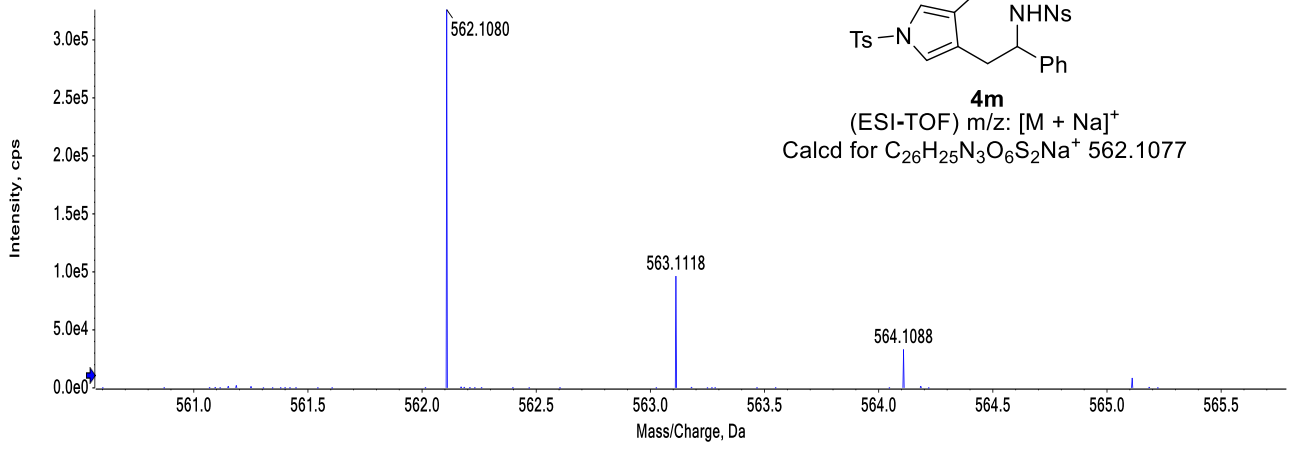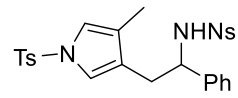

**4m**

(ESI-TOF) m/z: [M + Na]<sup>+</sup>

Calcd for C<sub>26</sub>H<sub>25</sub>N<sub>3</sub>O<sub>6</sub>S<sub>2</sub>Na<sup>+</sup> 562.1077

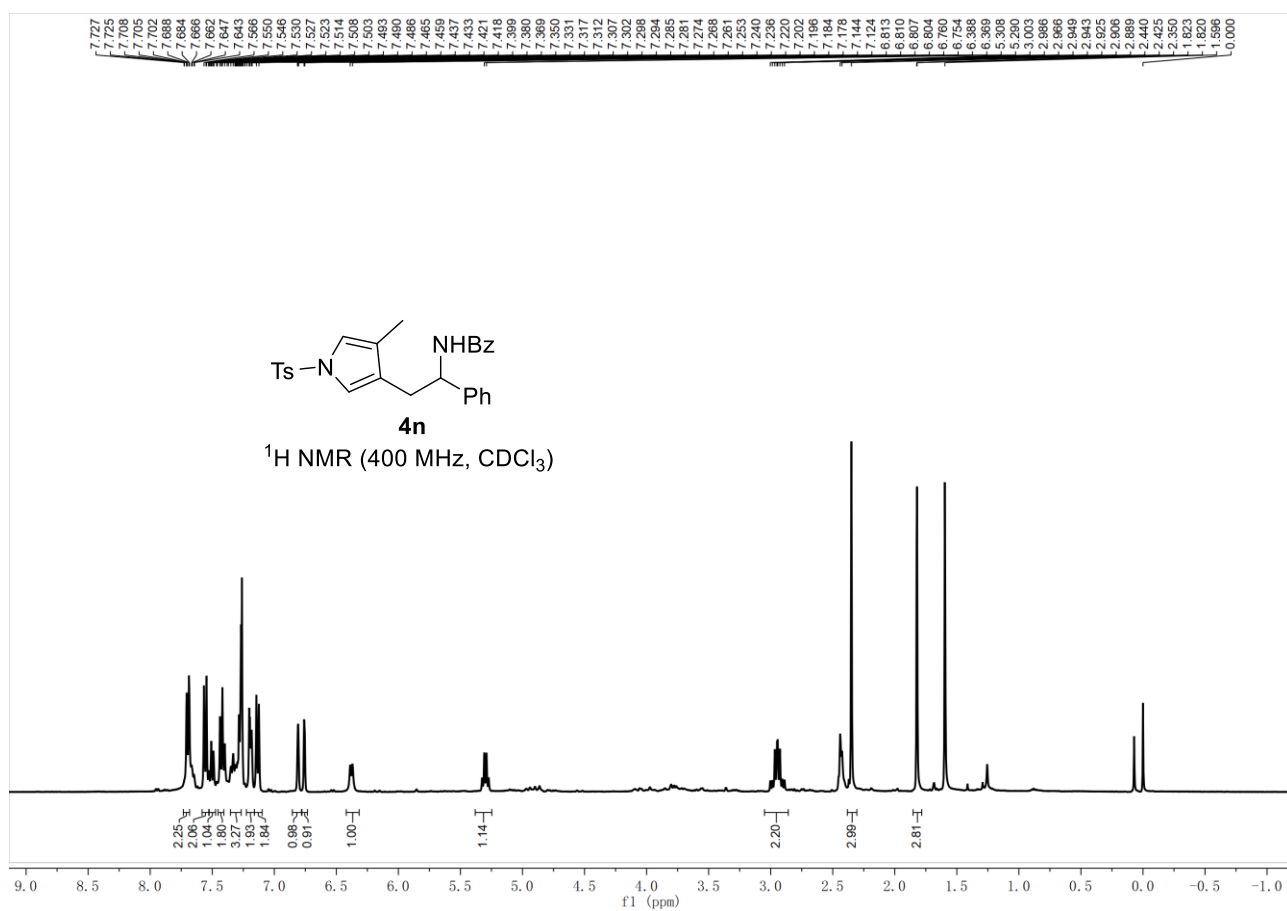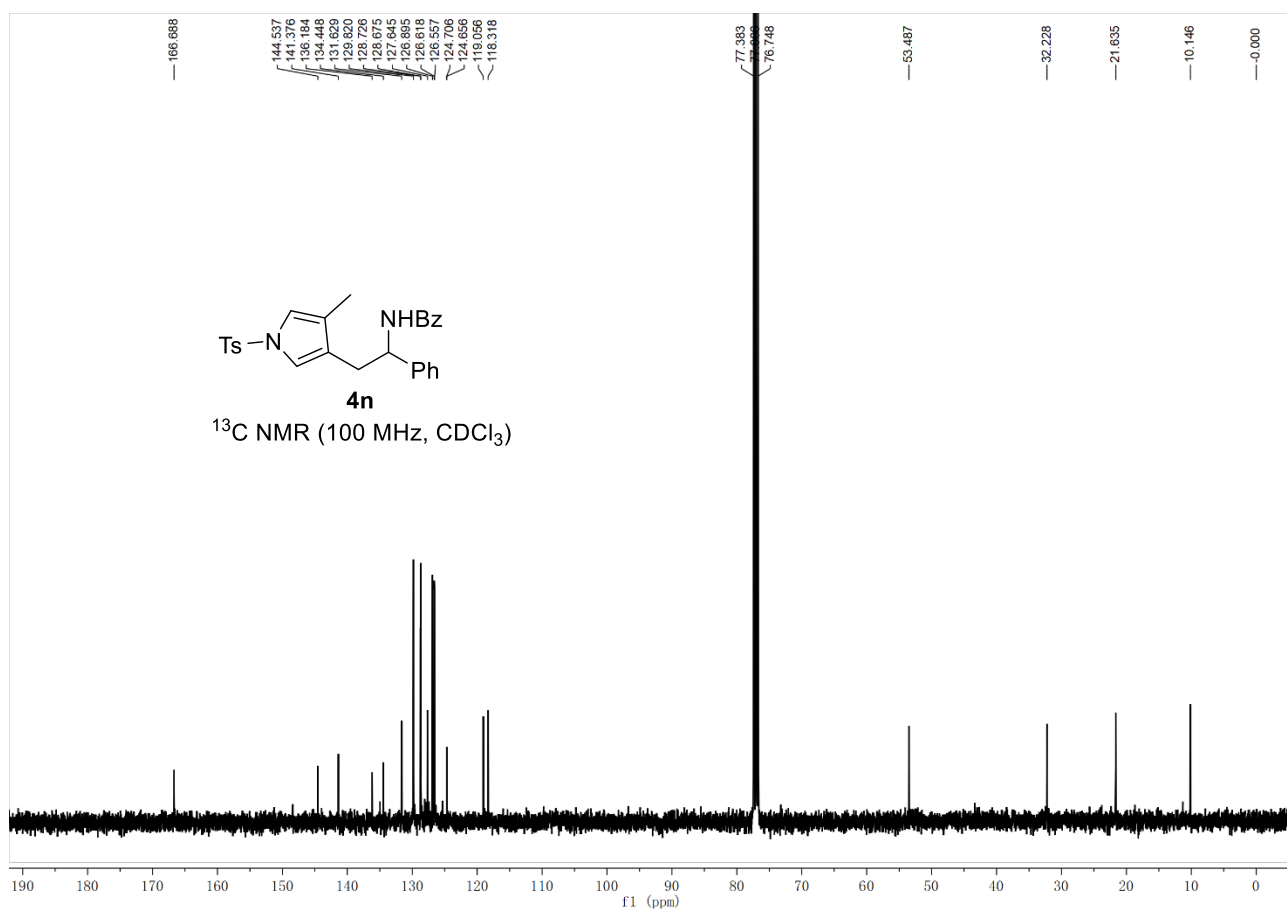

Spectrum from 20220820.wiff2 (sample 2) - 2, +TOF MS (300 - 600) from 0.061 to 0.086 min, Recalibrated, centroided

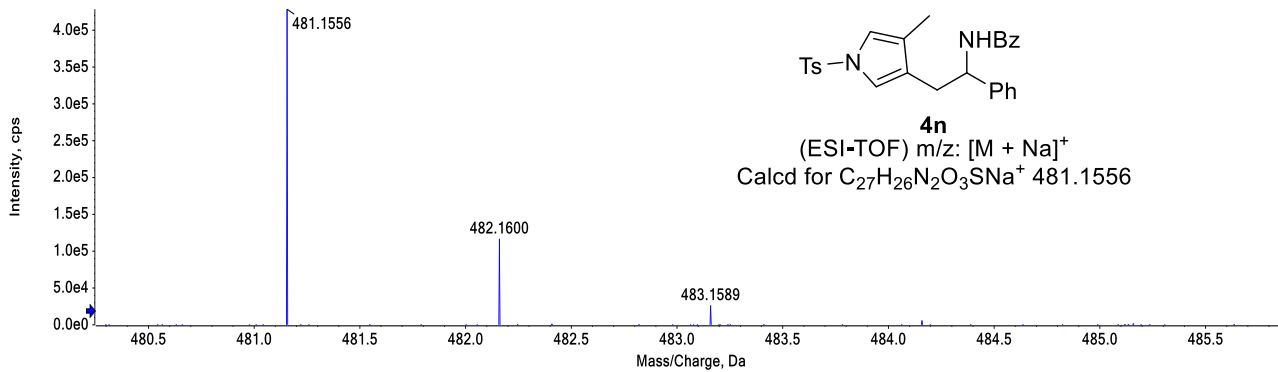

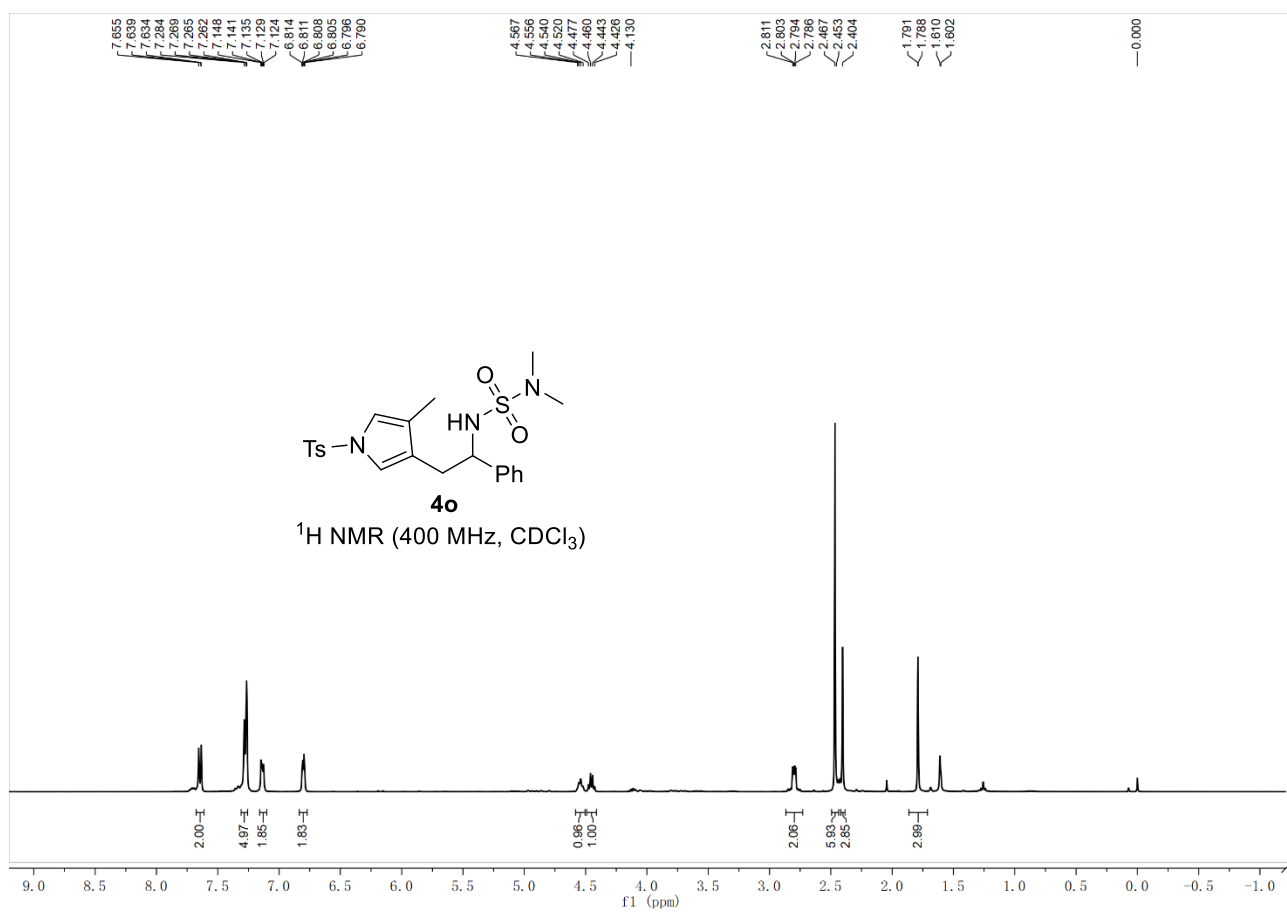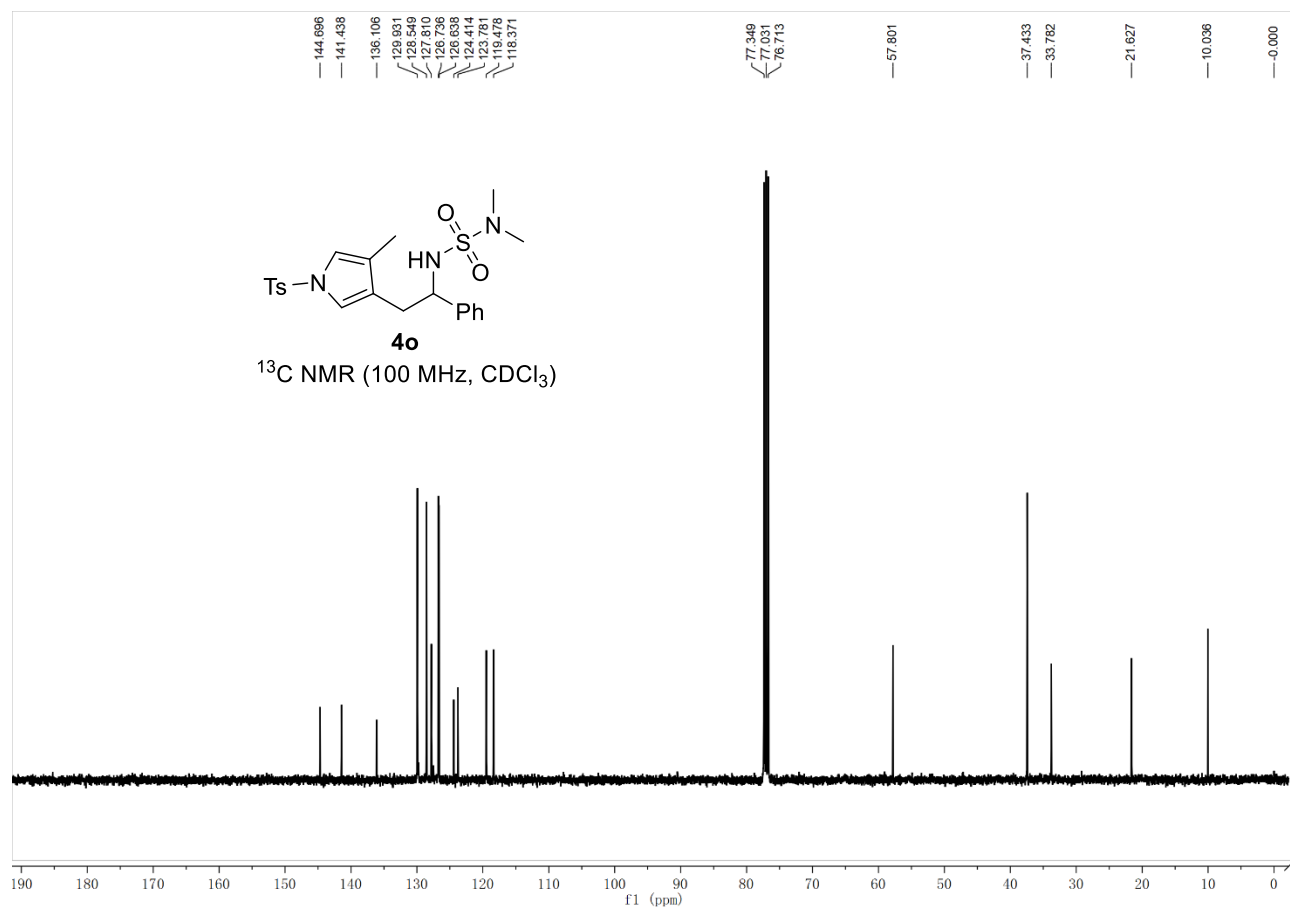



Spectrum from 20220820.wiff2 (sample 4) - 4, +TOF MS (300 - 600) from 0.061 to 0.086 min, Recalibrated, centroided

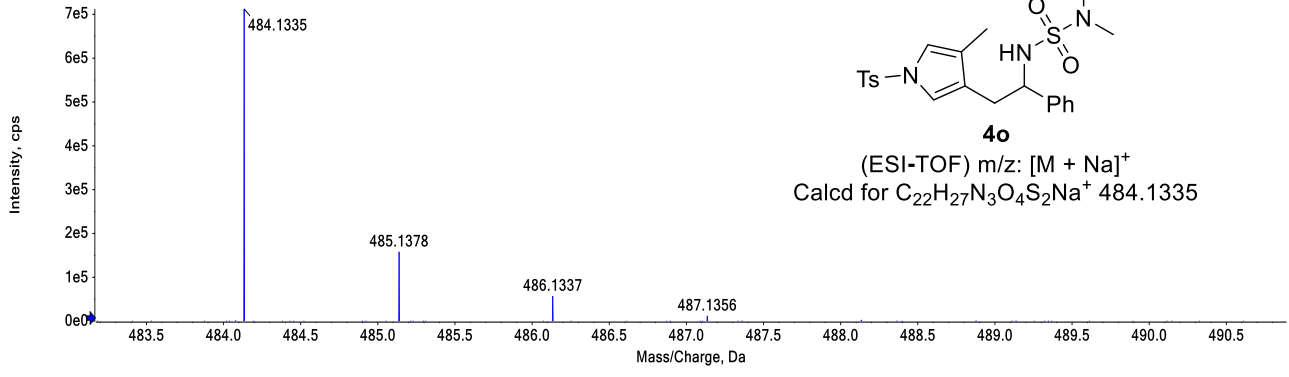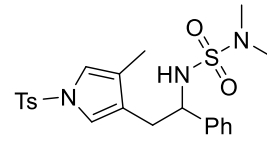

**4o**

(ESI-TOF) m/z: [M + Na]<sup>+</sup>  
Calcd for C<sub>22</sub>H<sub>27</sub>N<sub>3</sub>O<sub>4</sub>S<sub>2</sub>Na<sup>+</sup> 484.1335

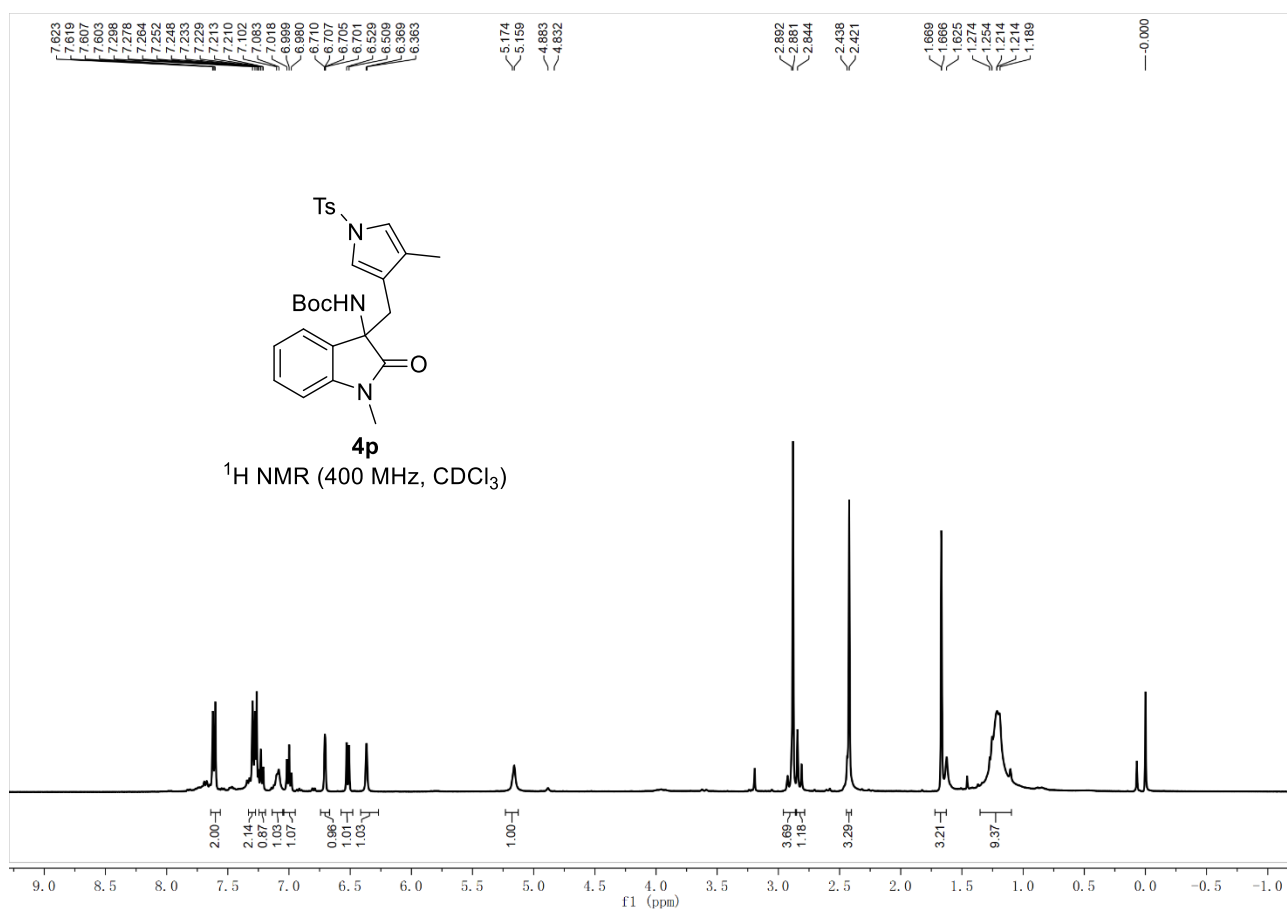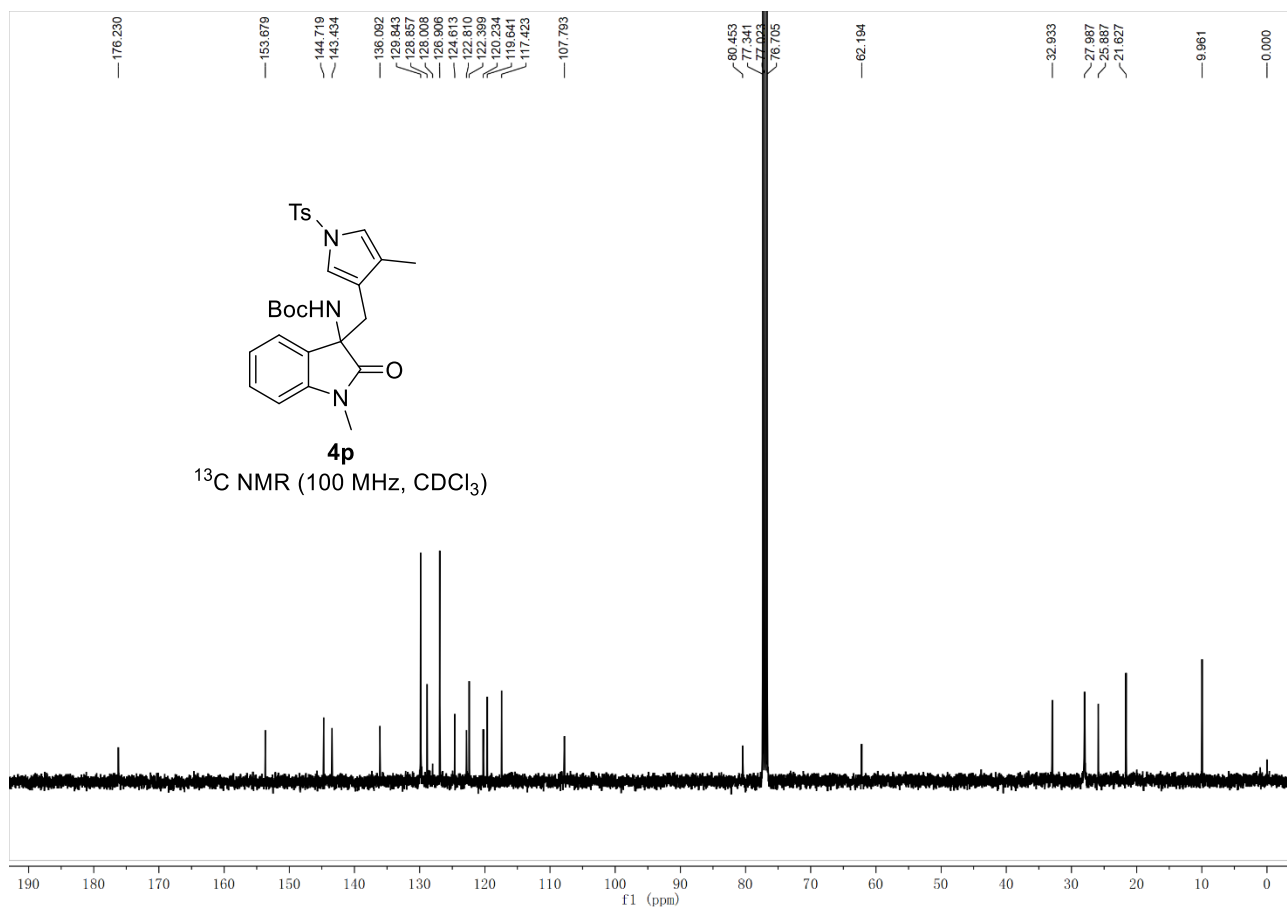

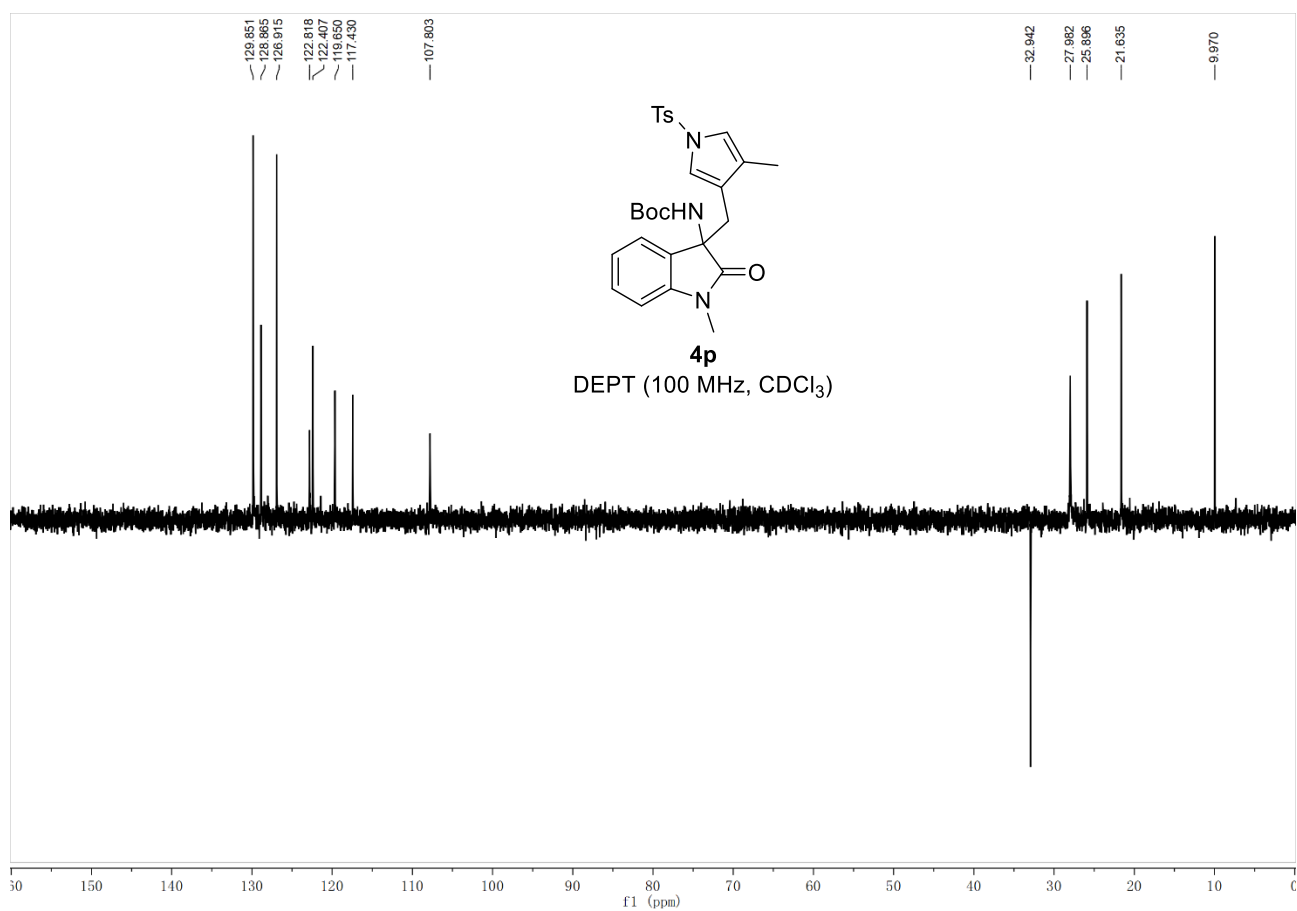

Spectrum from 20220820.wiff2 (sample 1) - 1, +TOF MS (300 - 600) from 0.031 to 0.056 min, Recalibrated, centroided

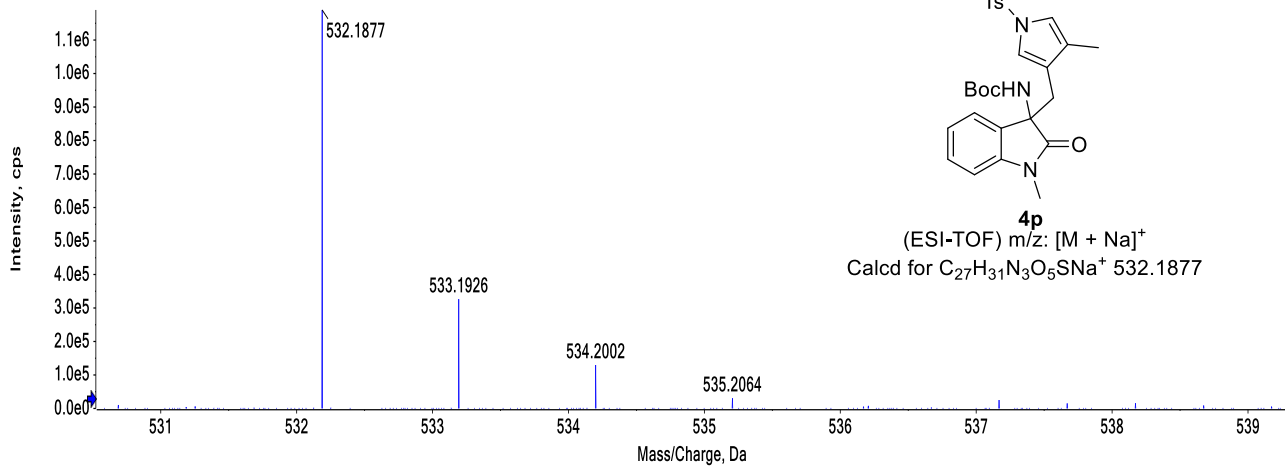

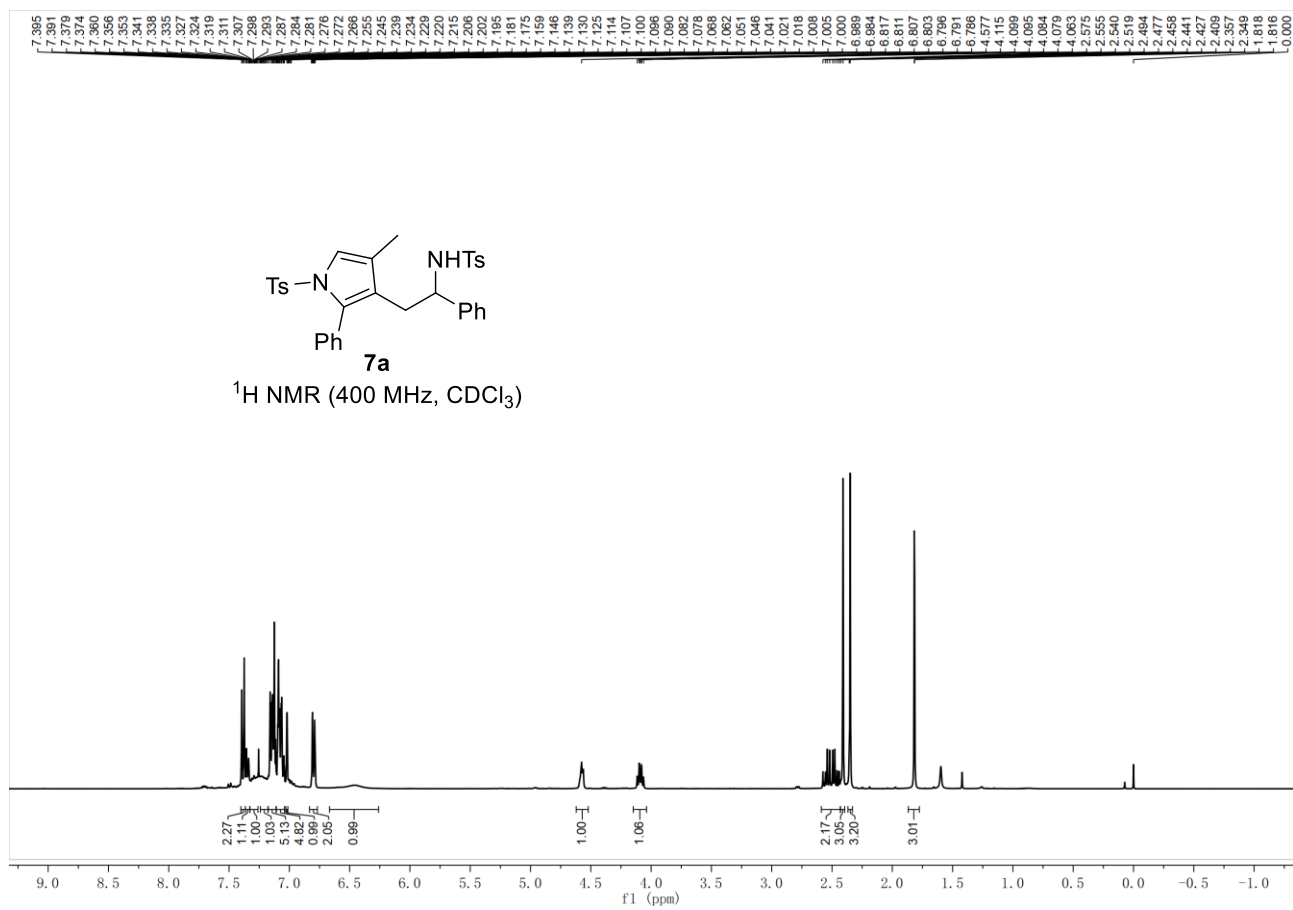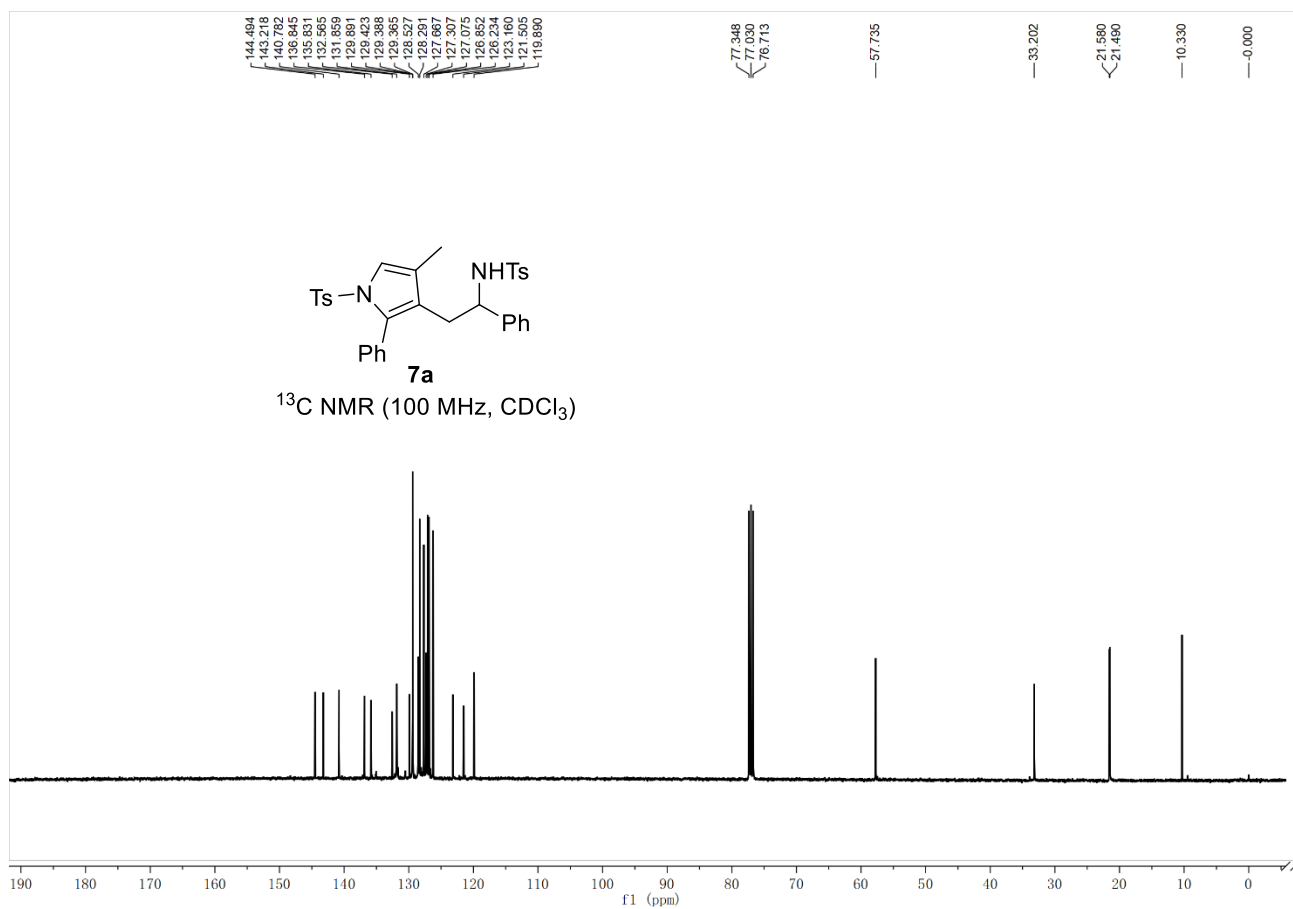

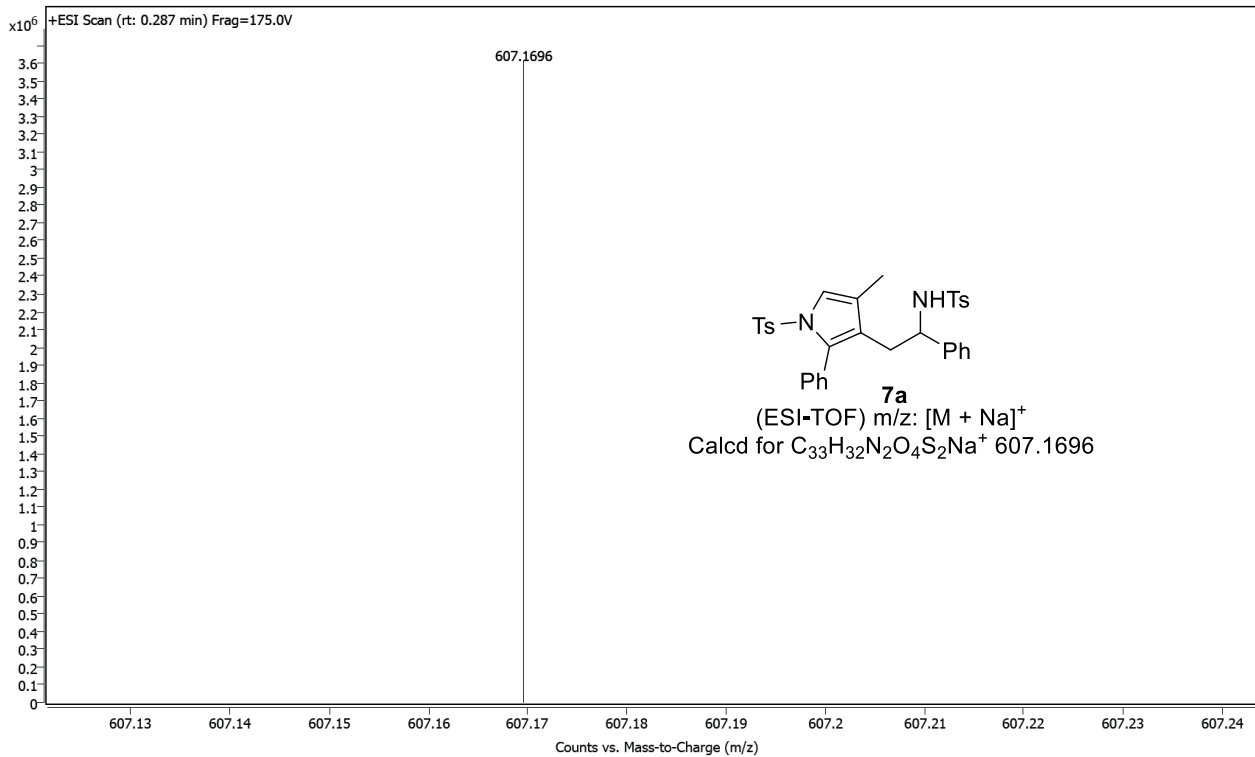

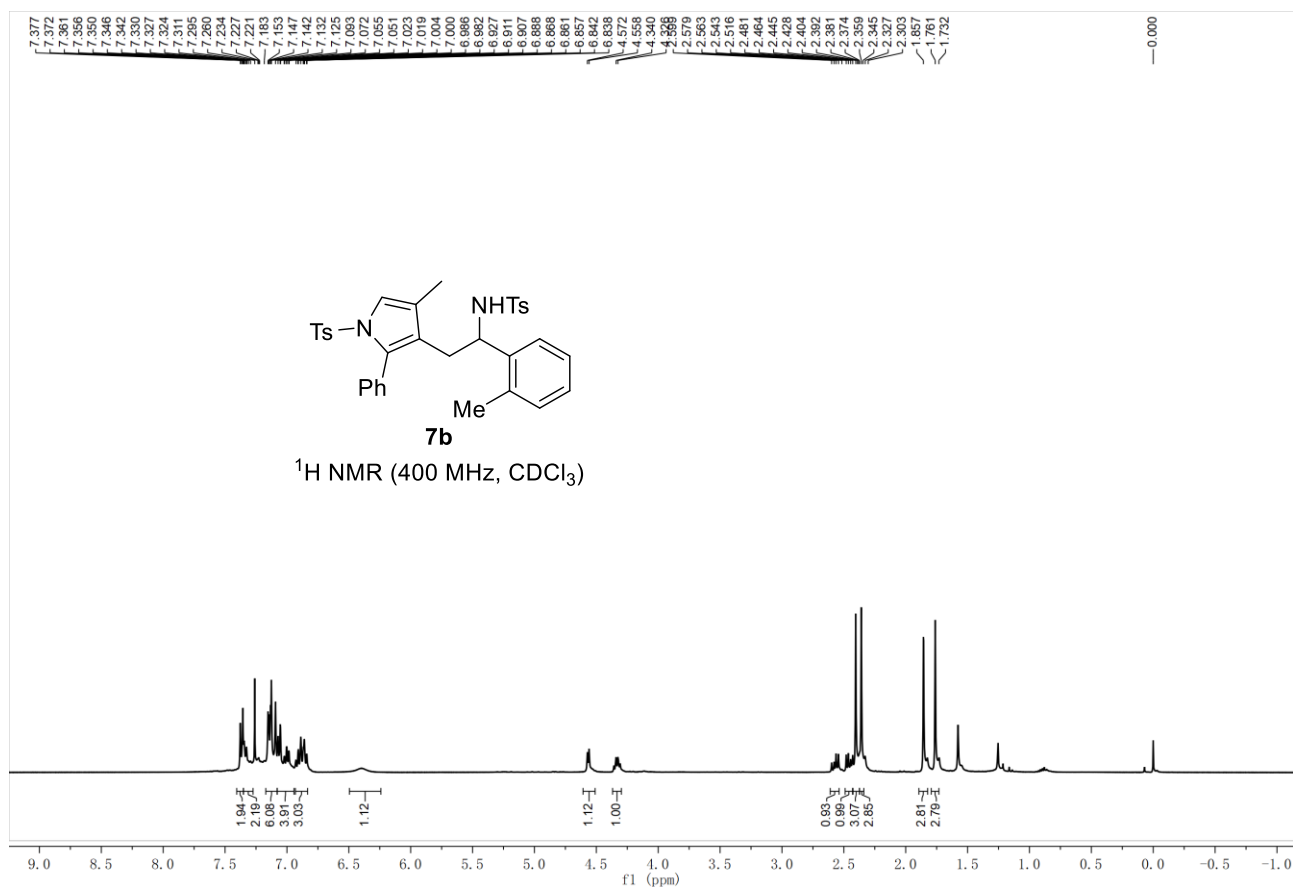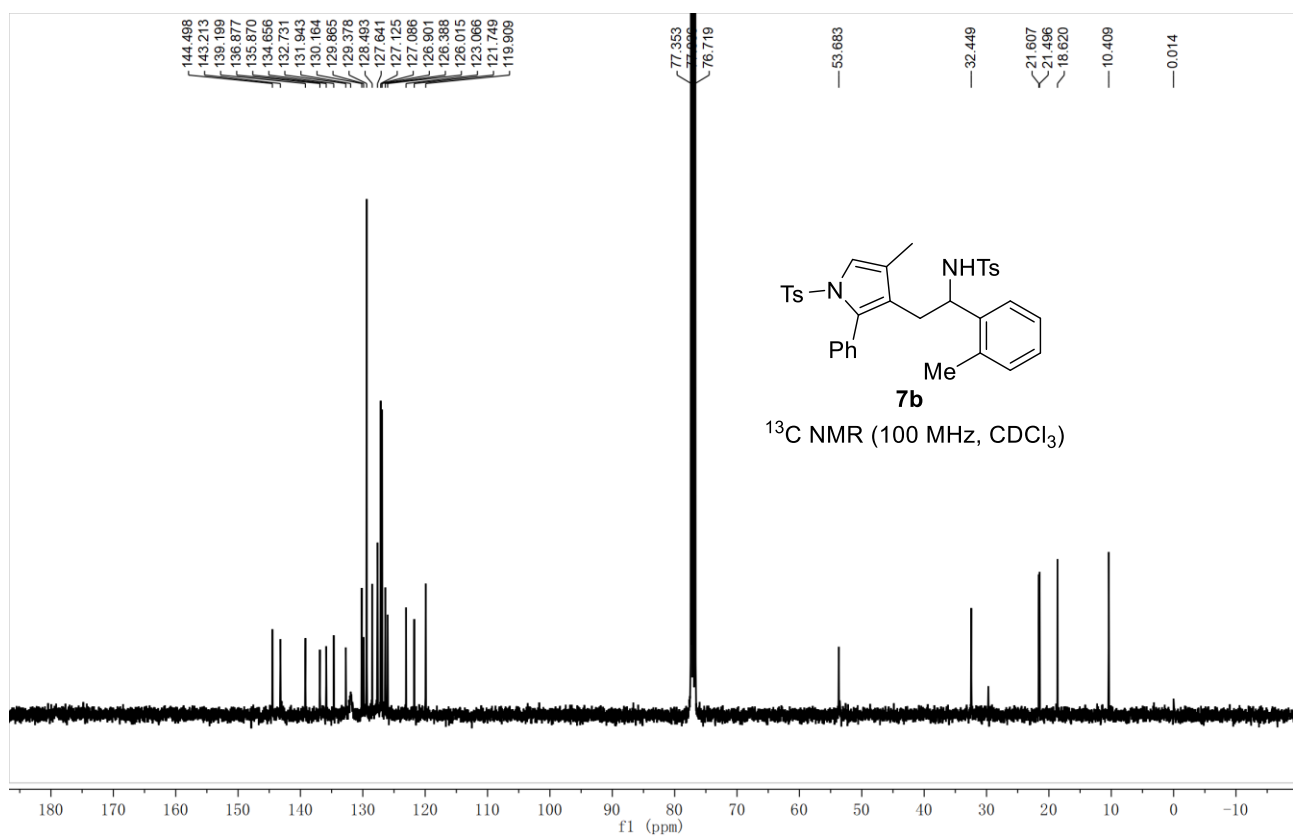

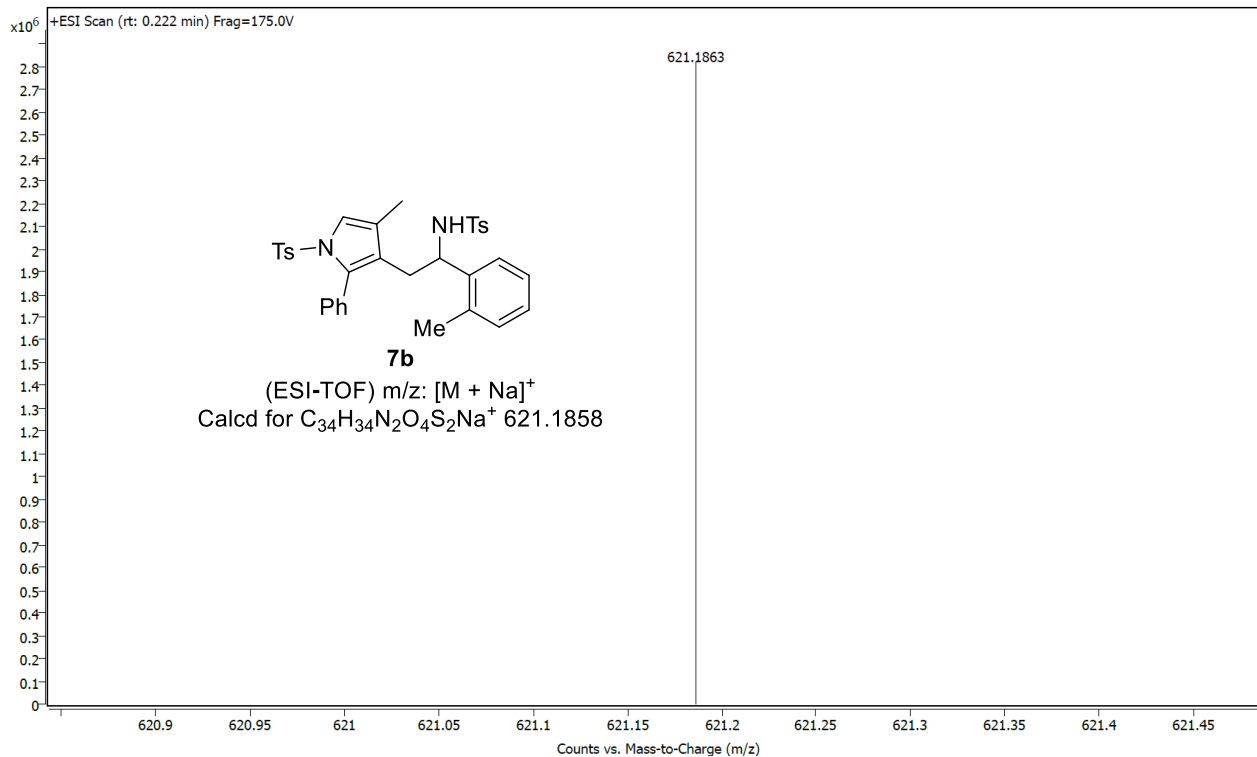

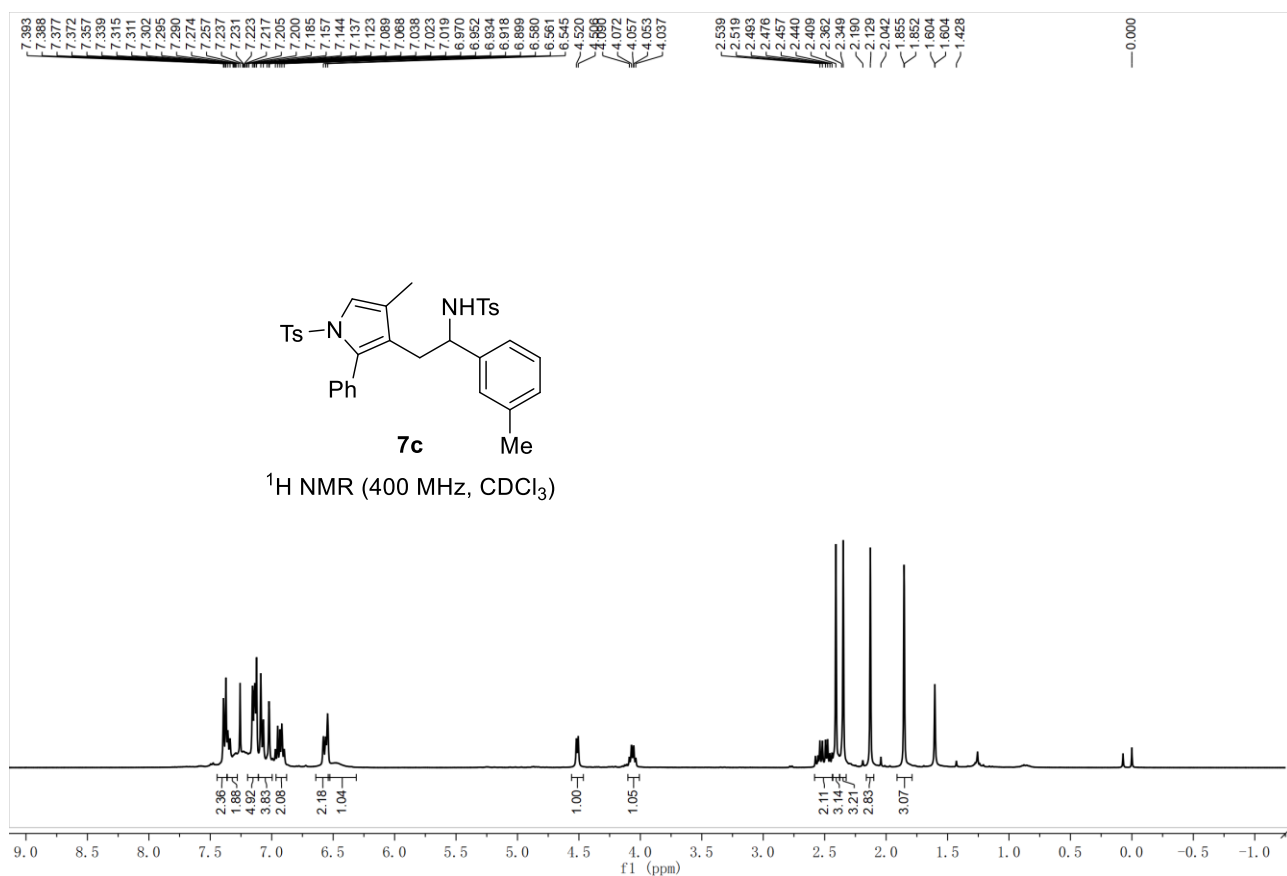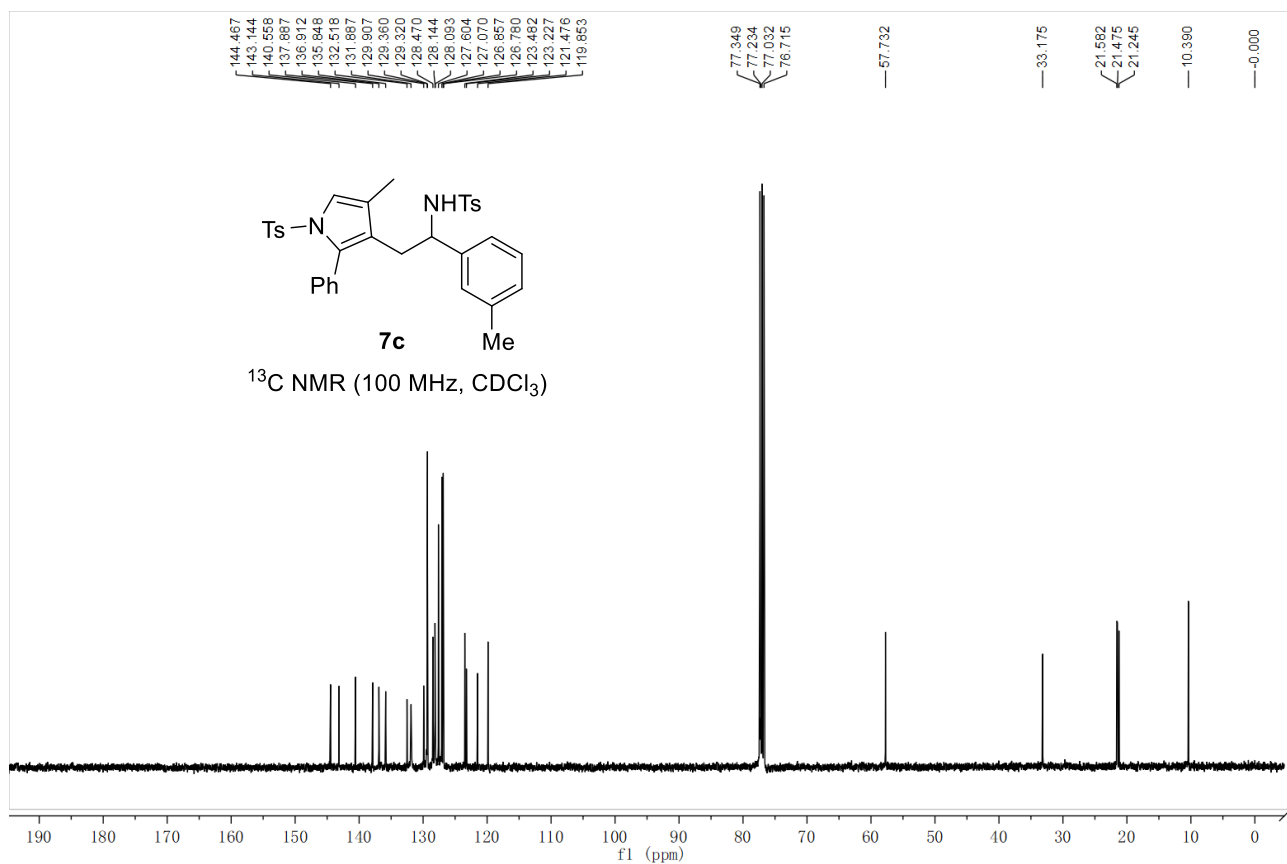



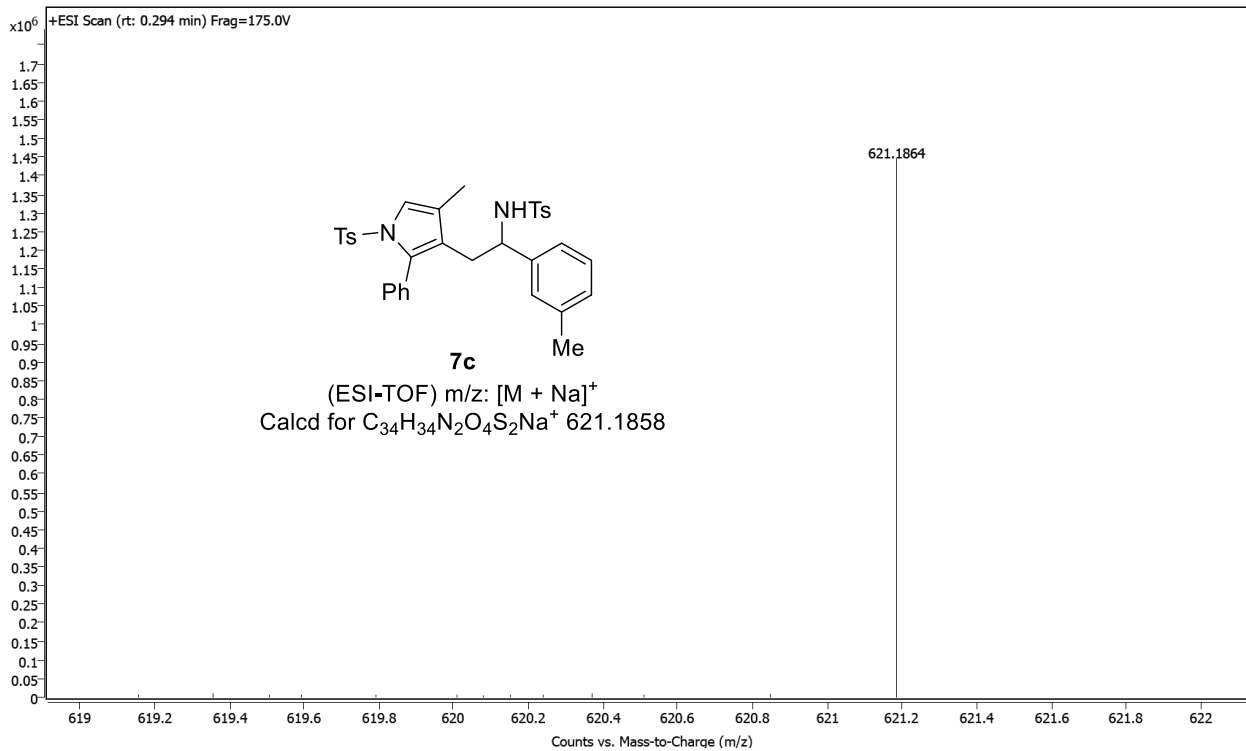

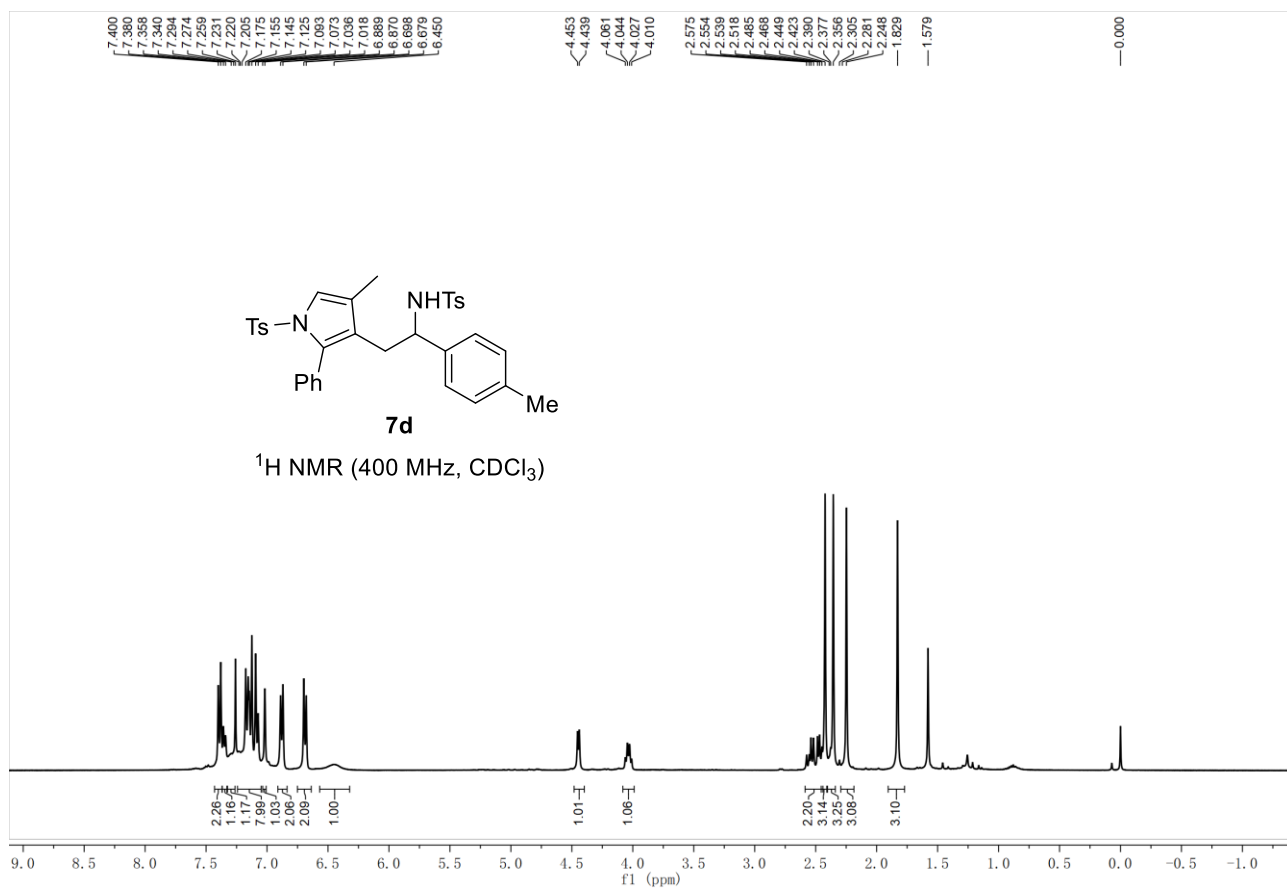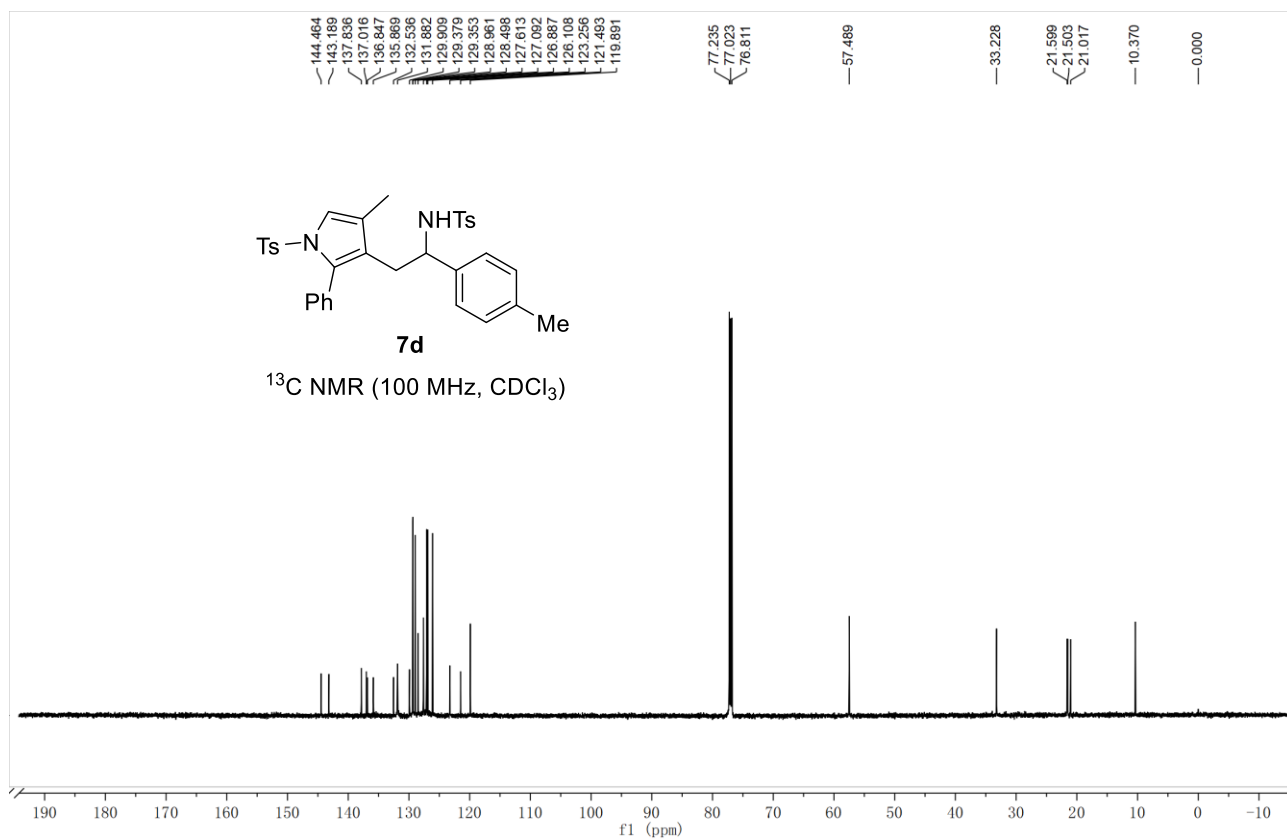

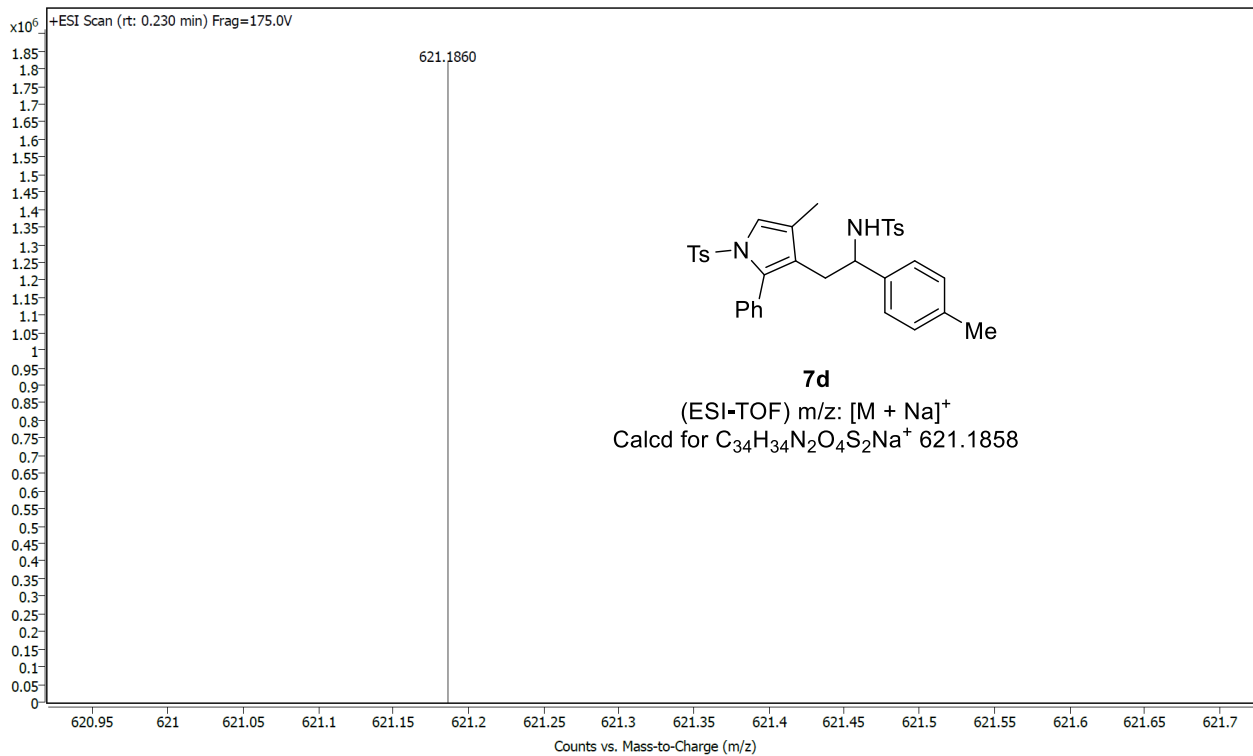

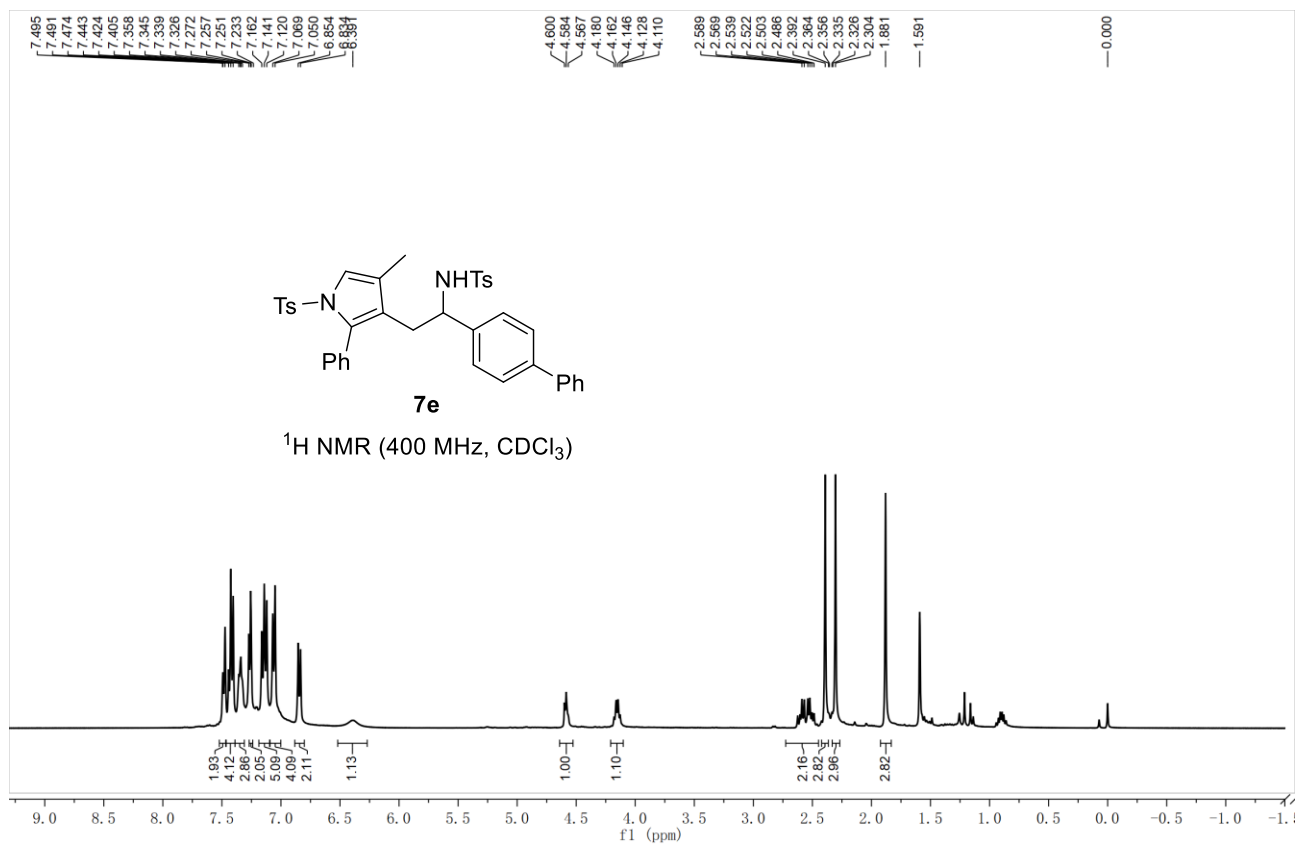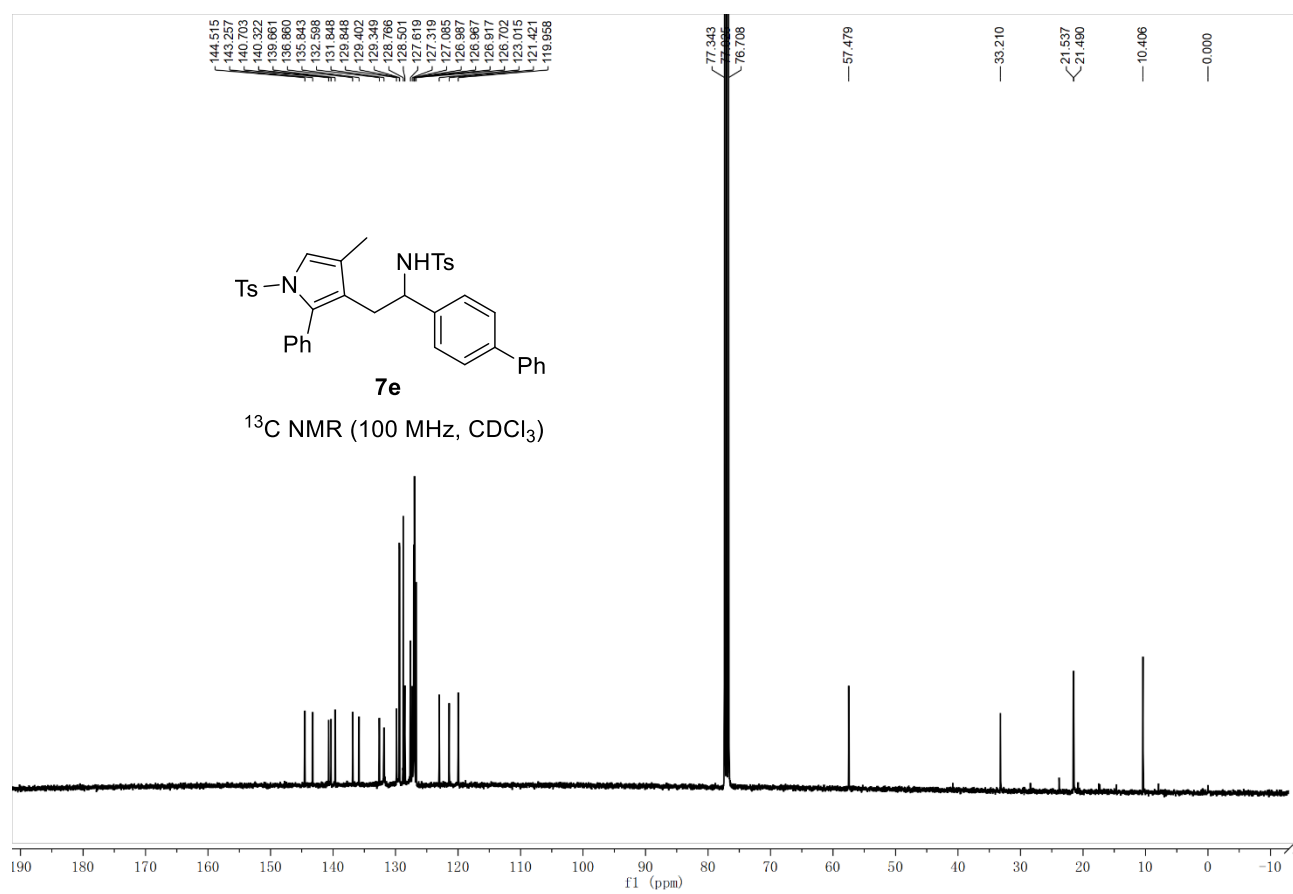

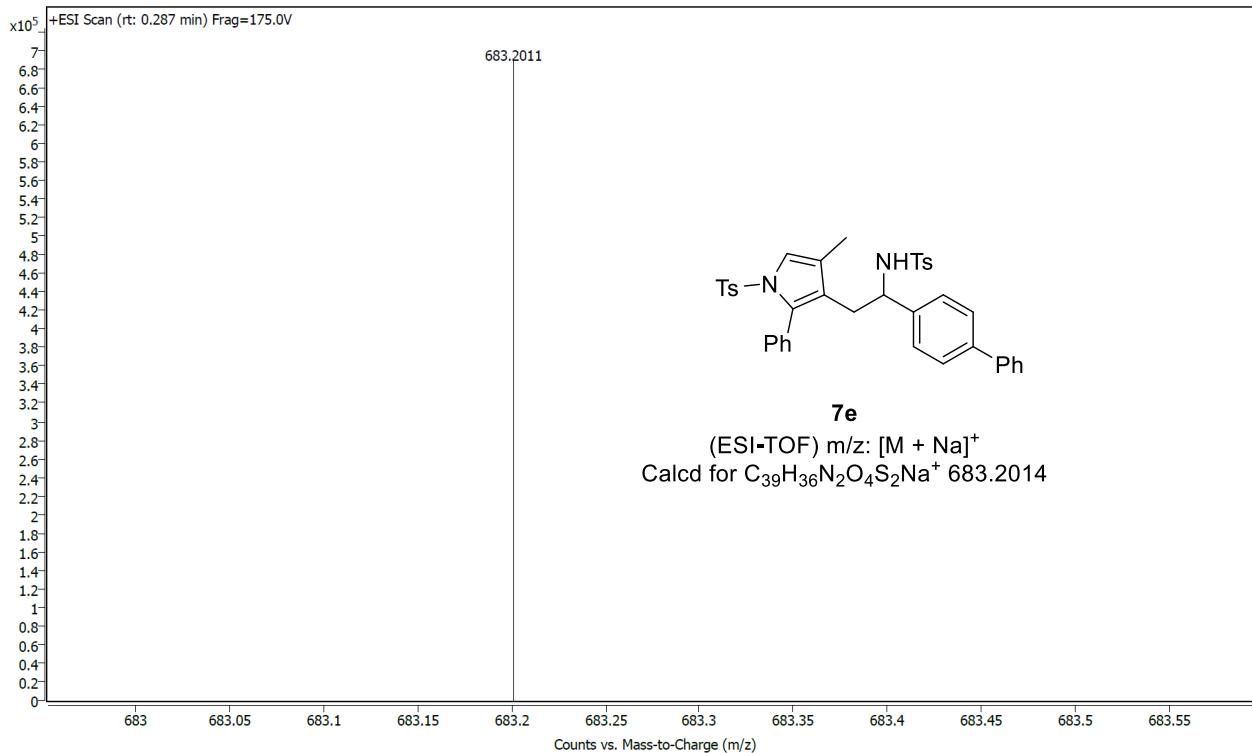

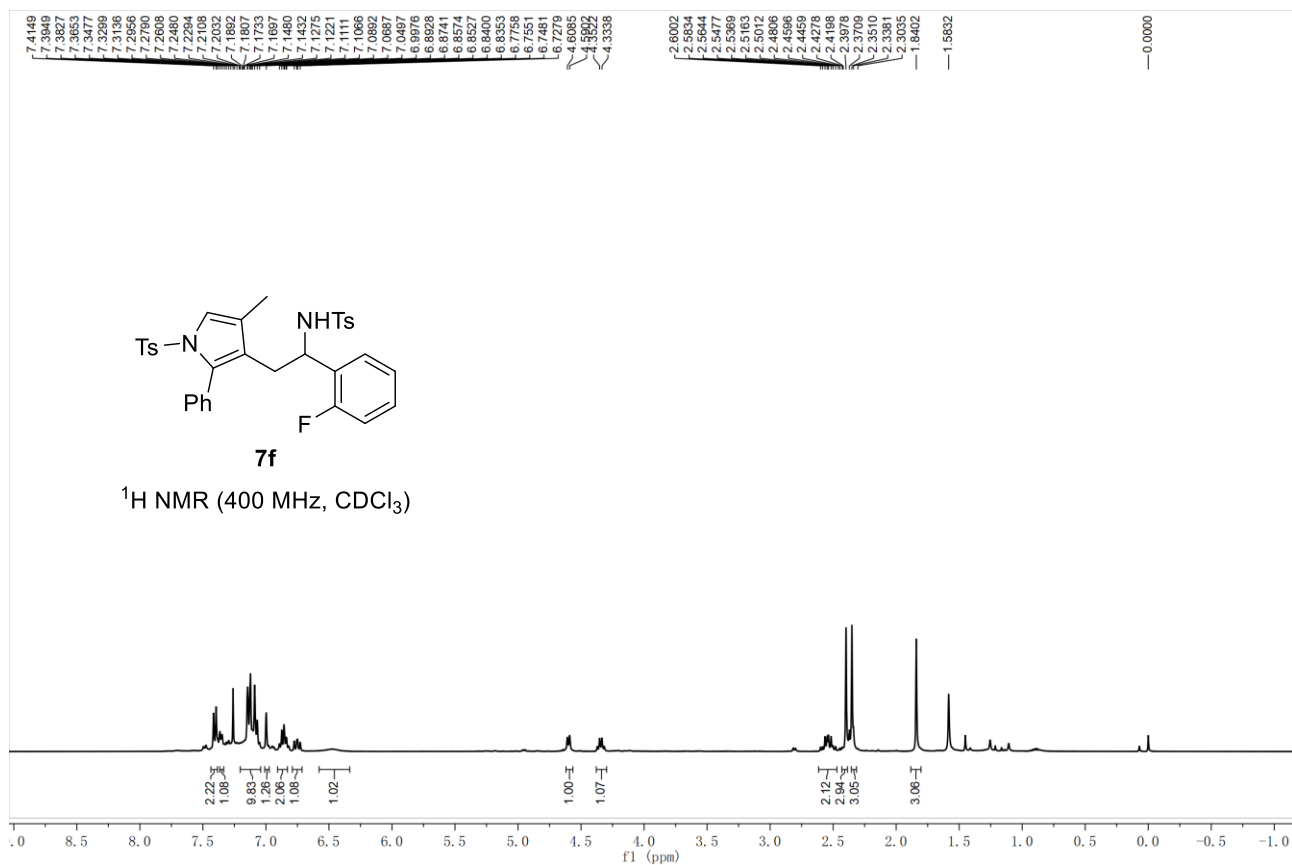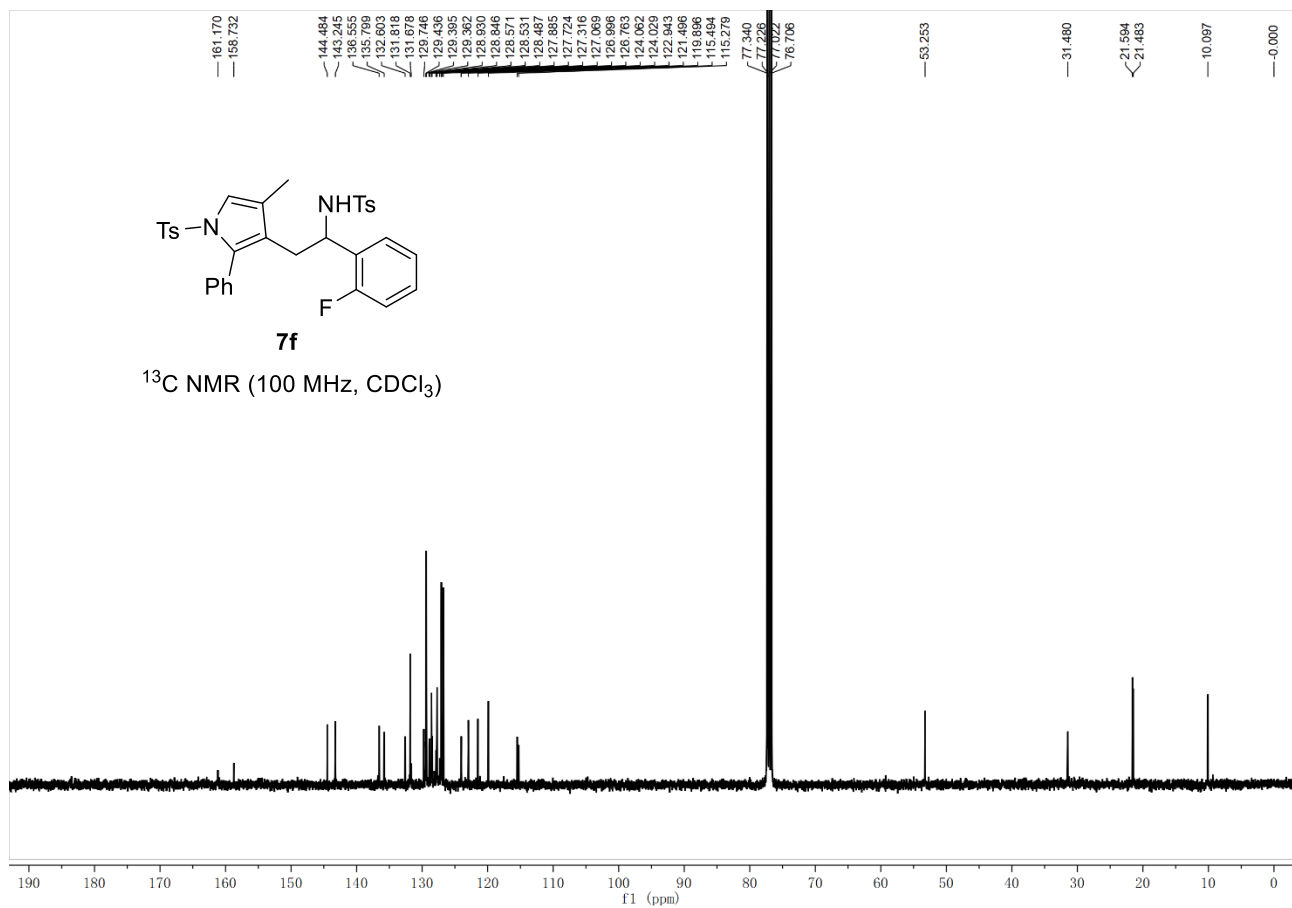

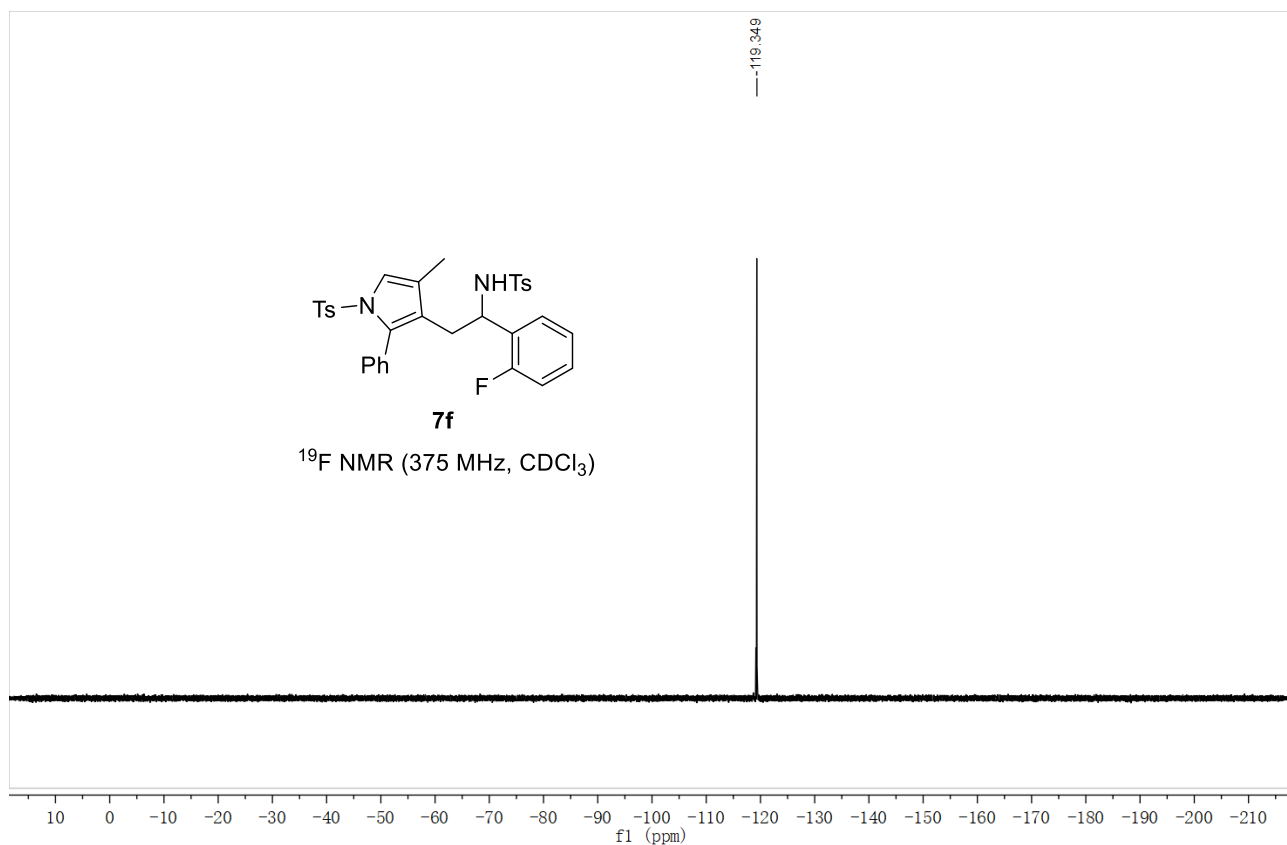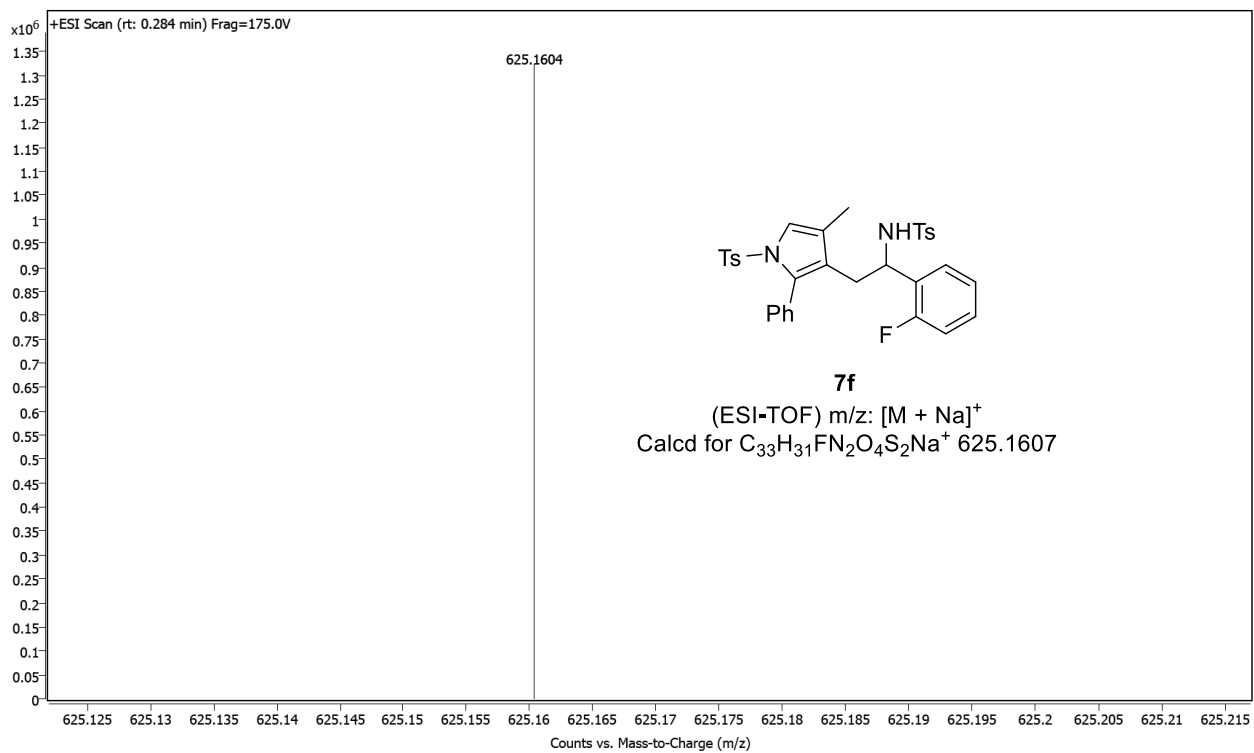

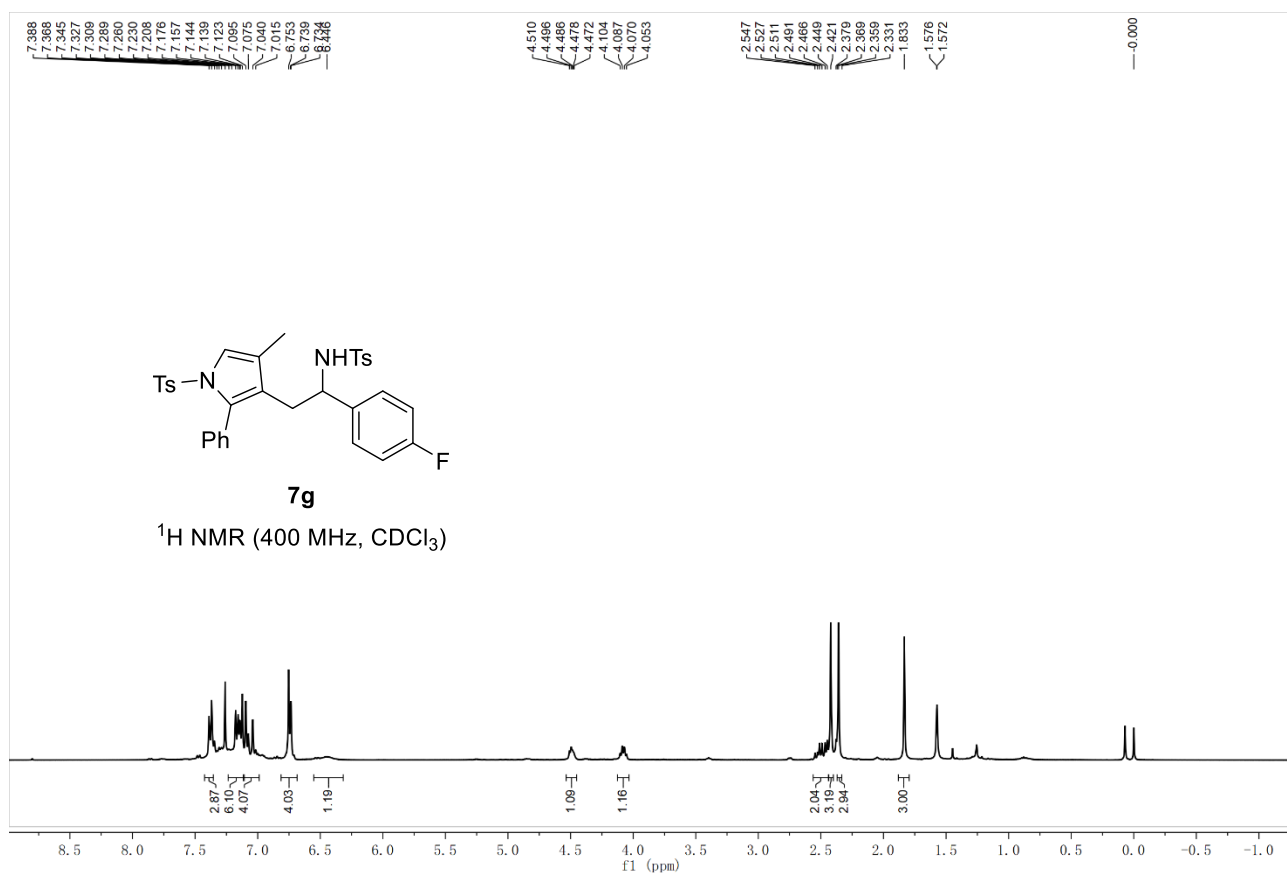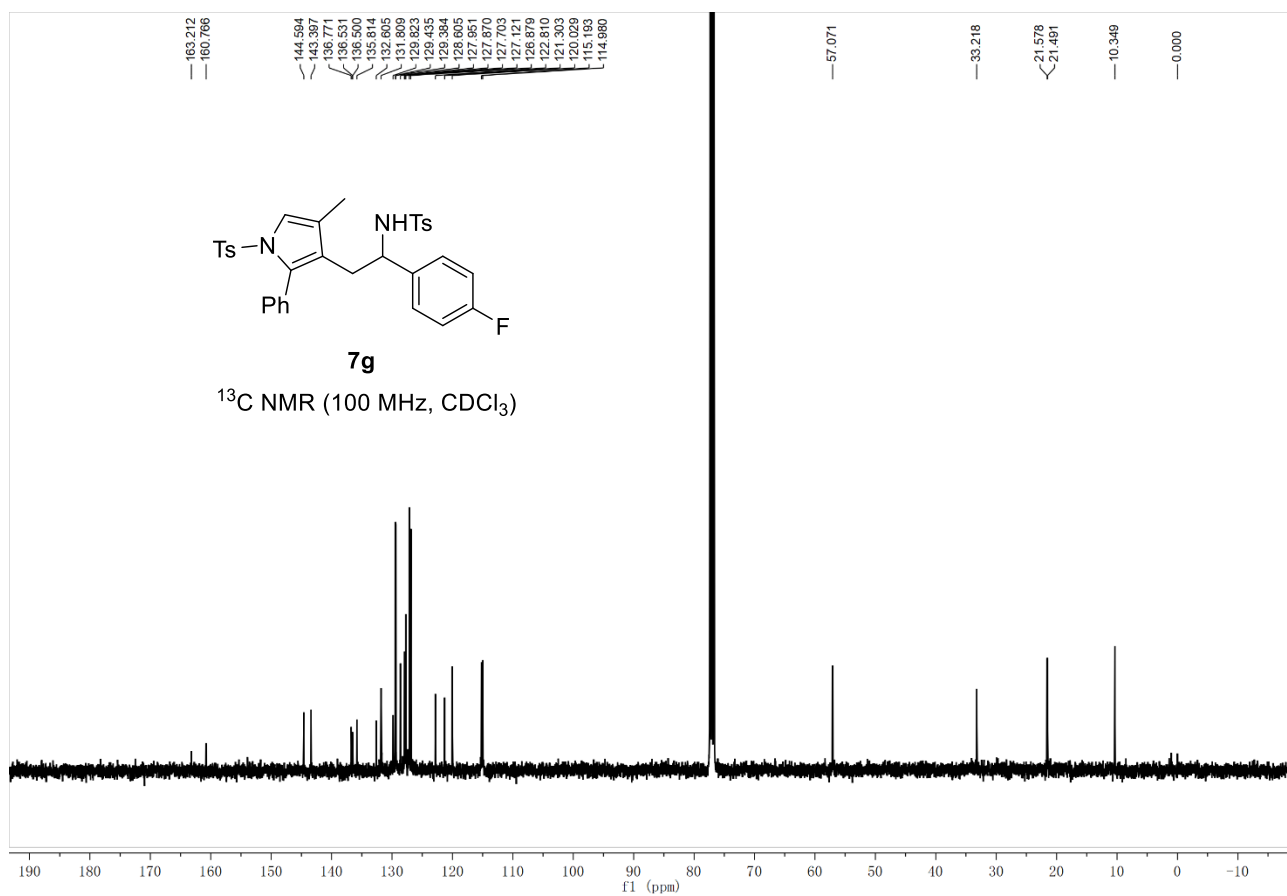



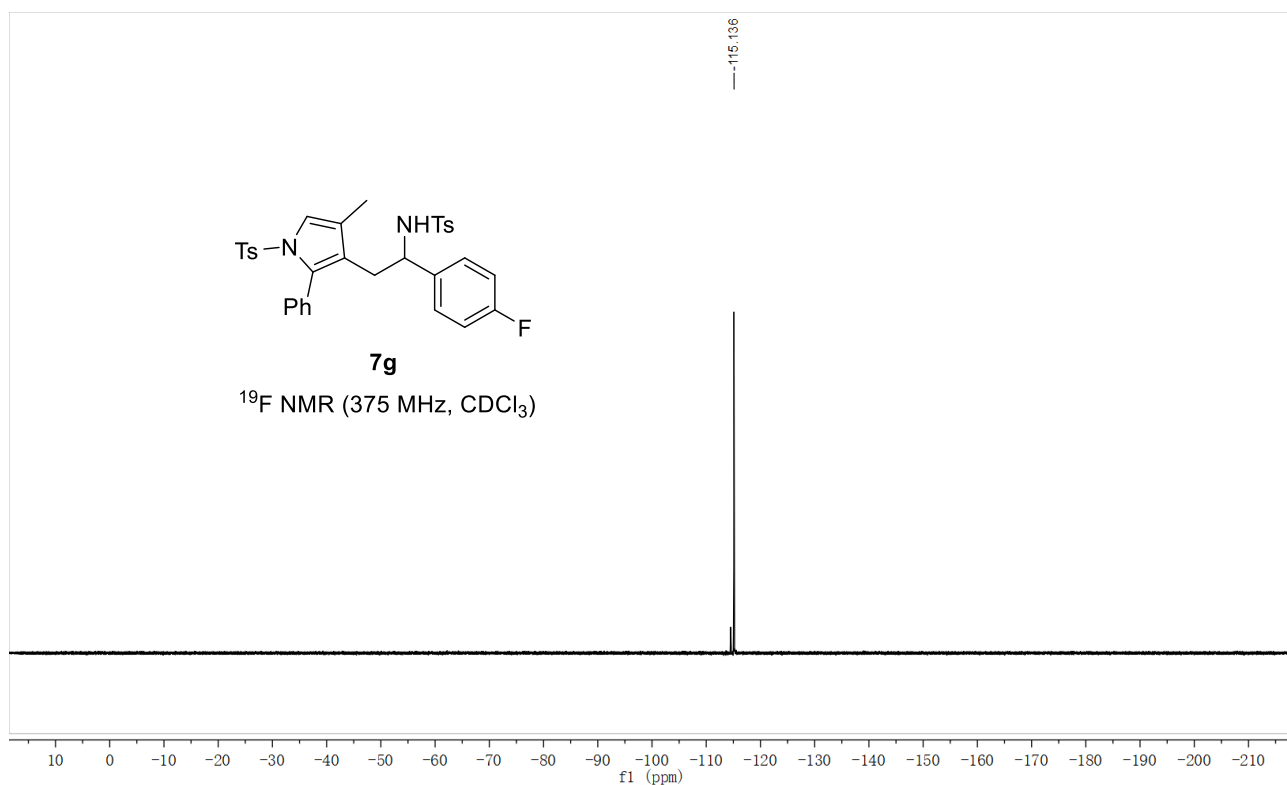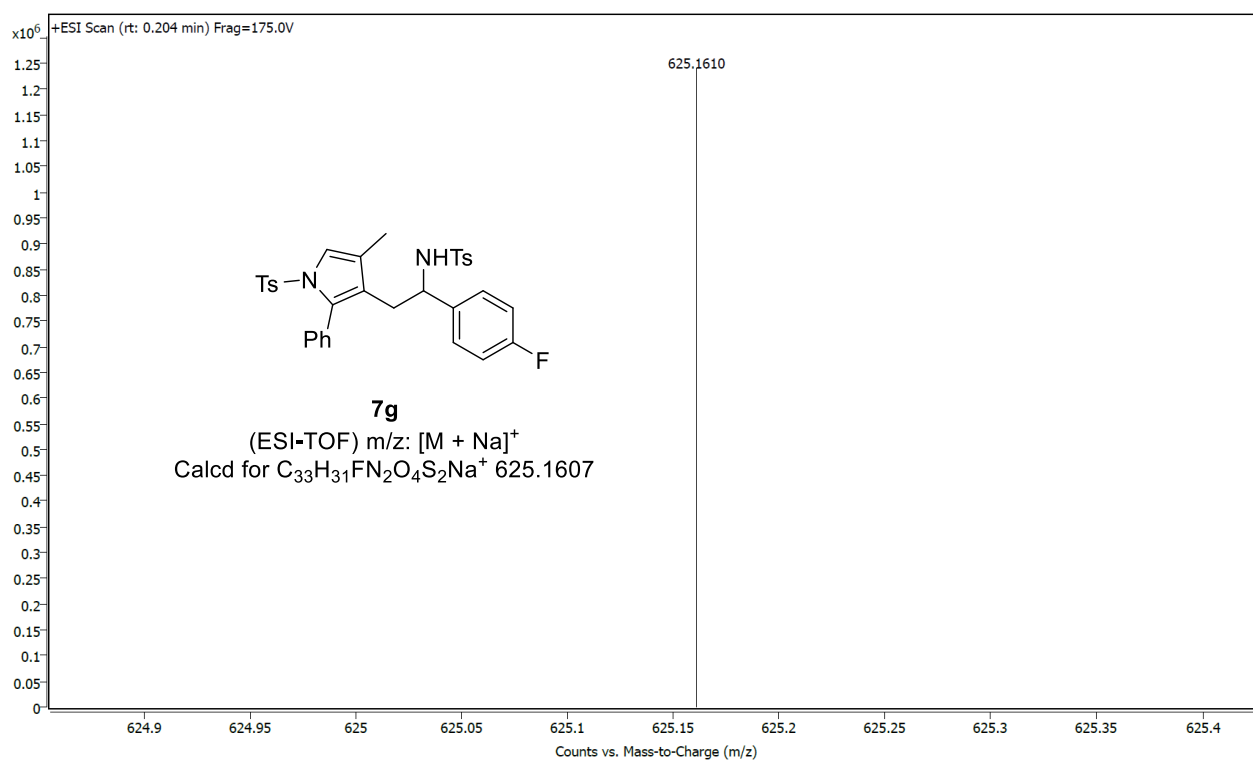

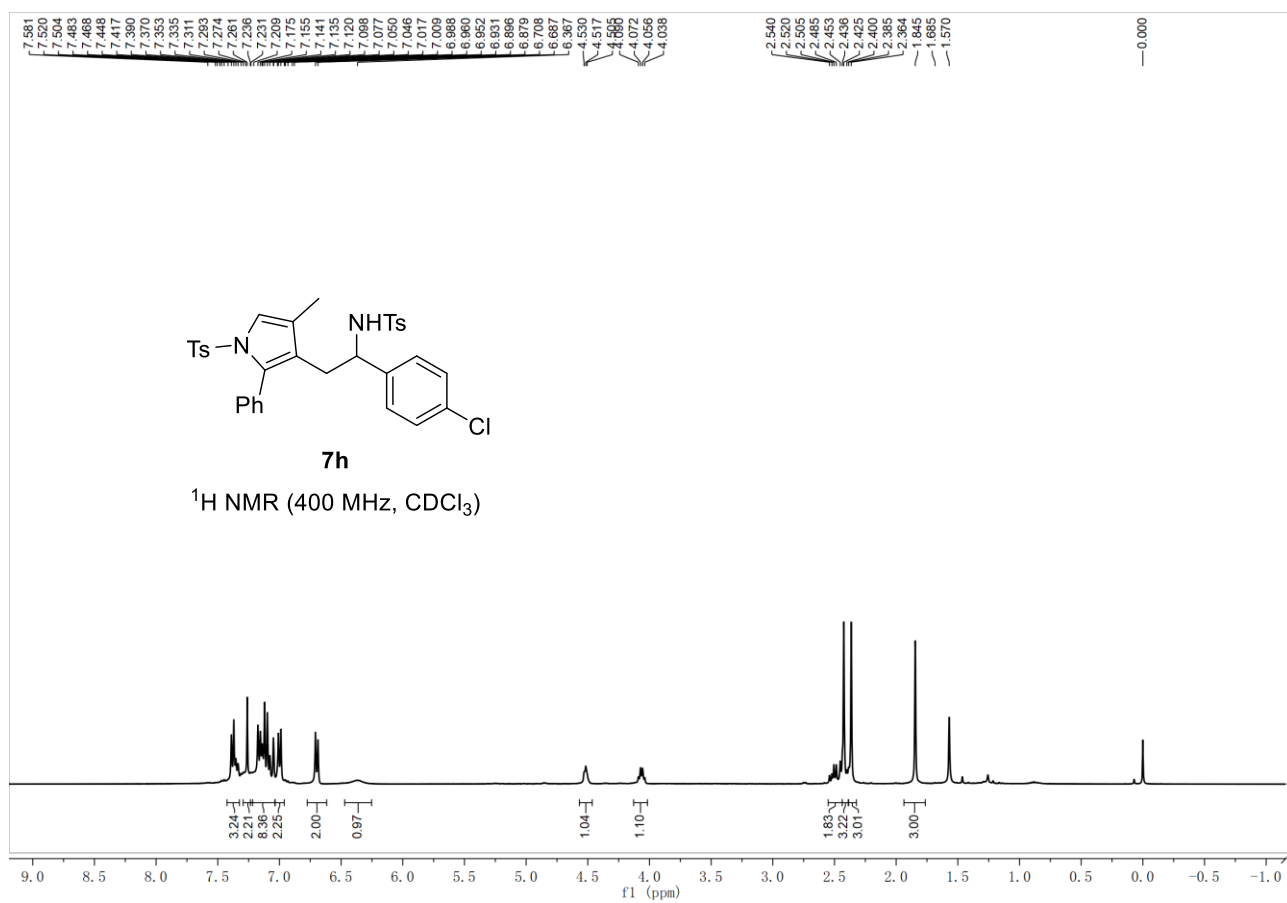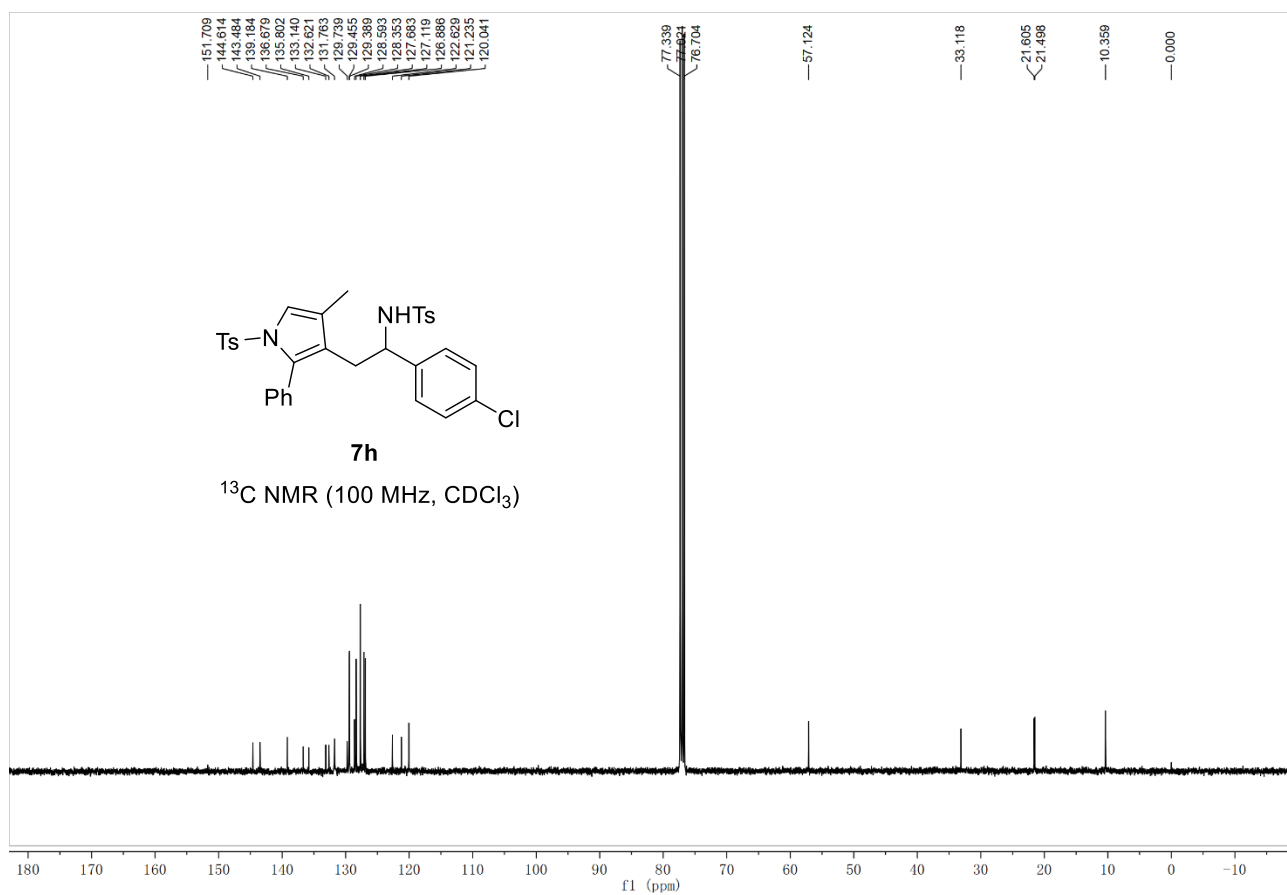

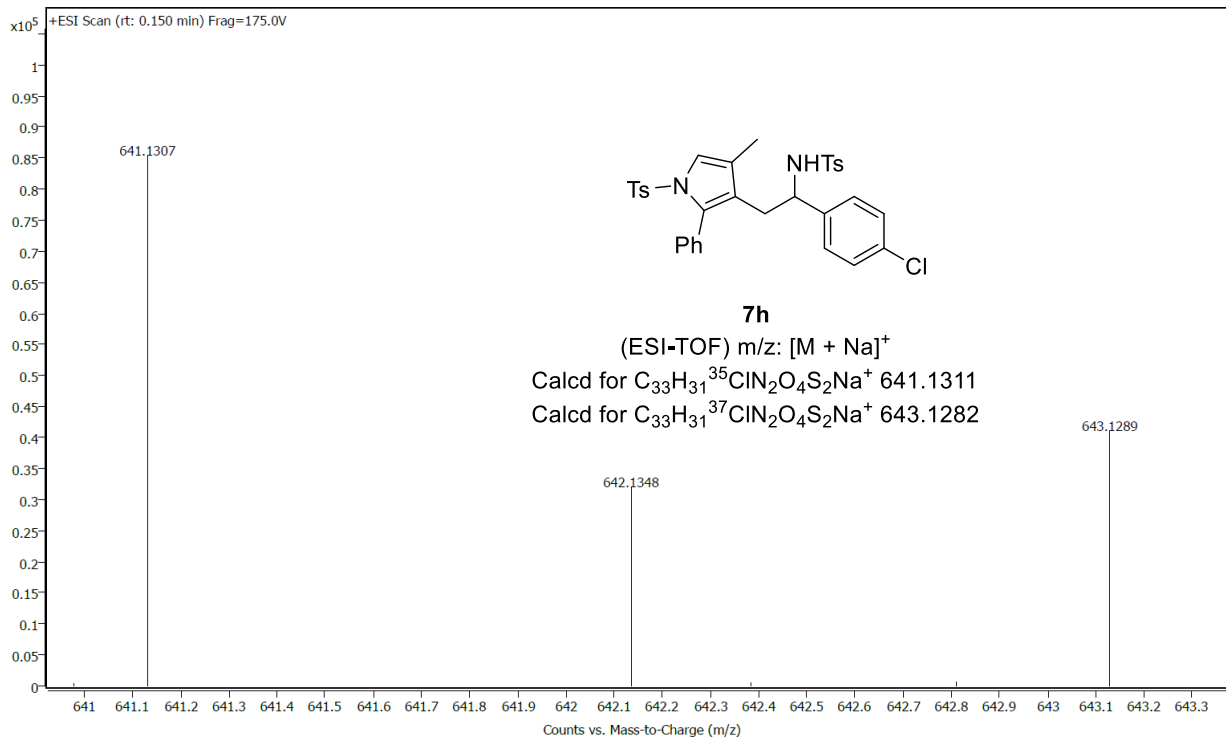

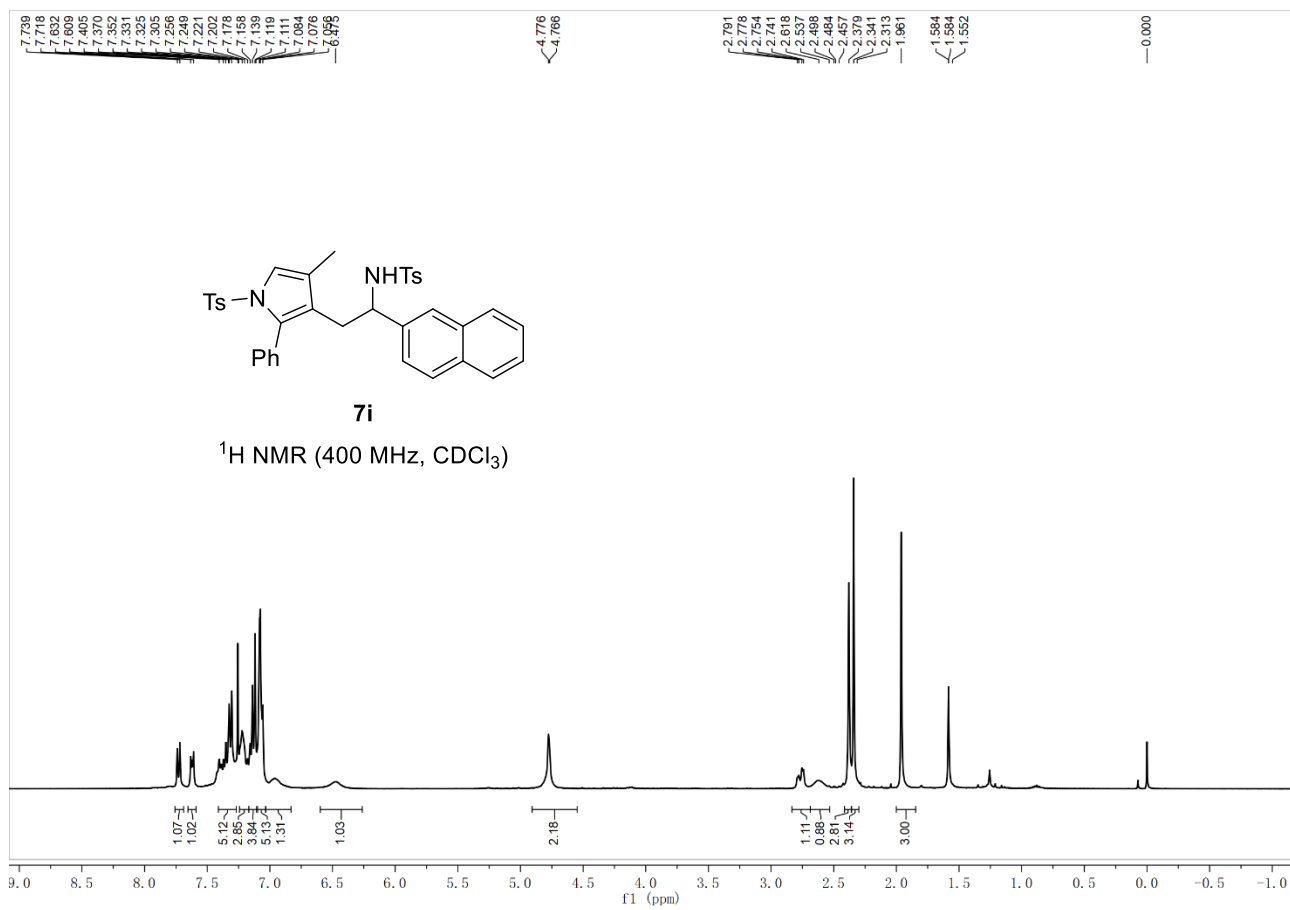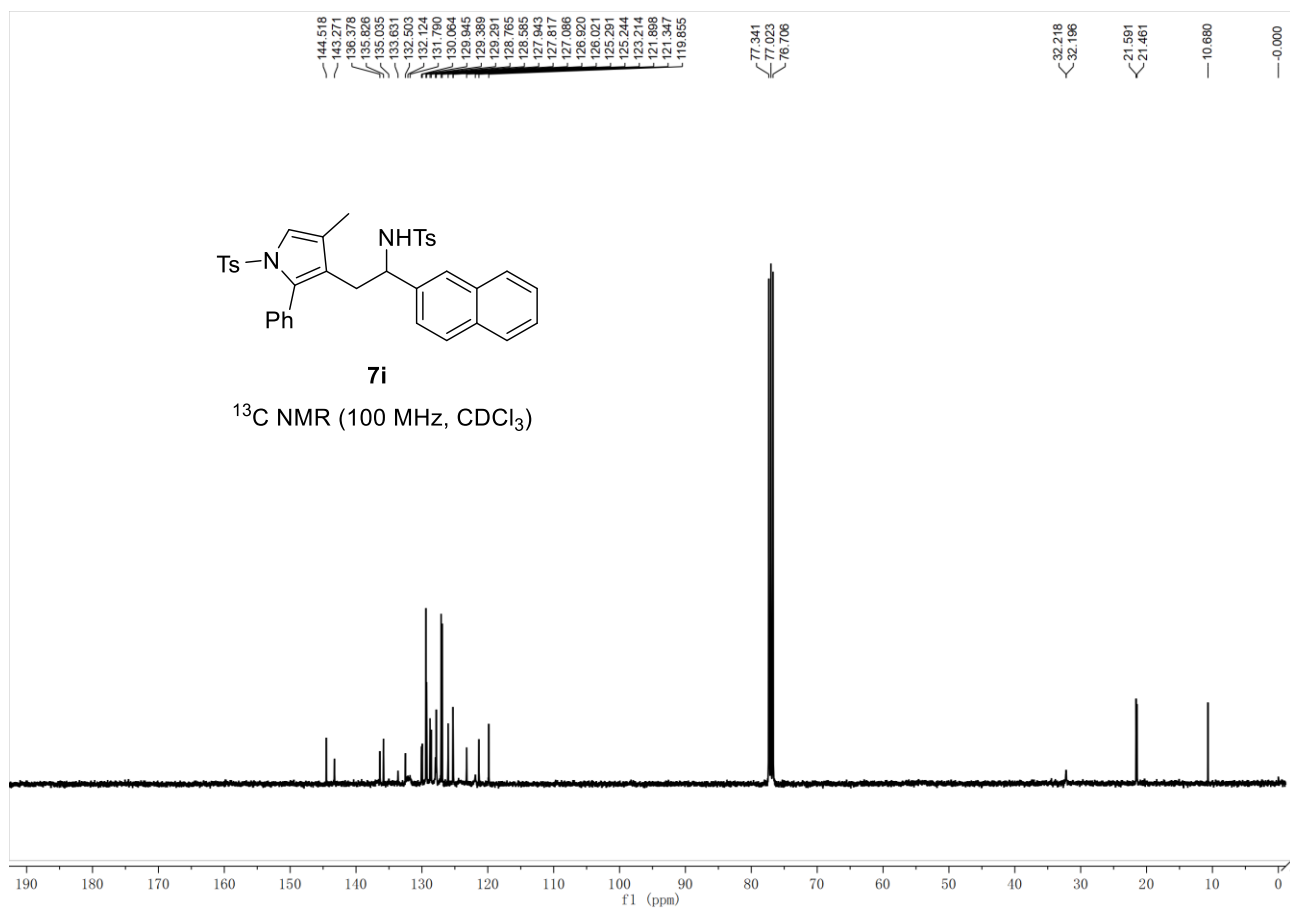

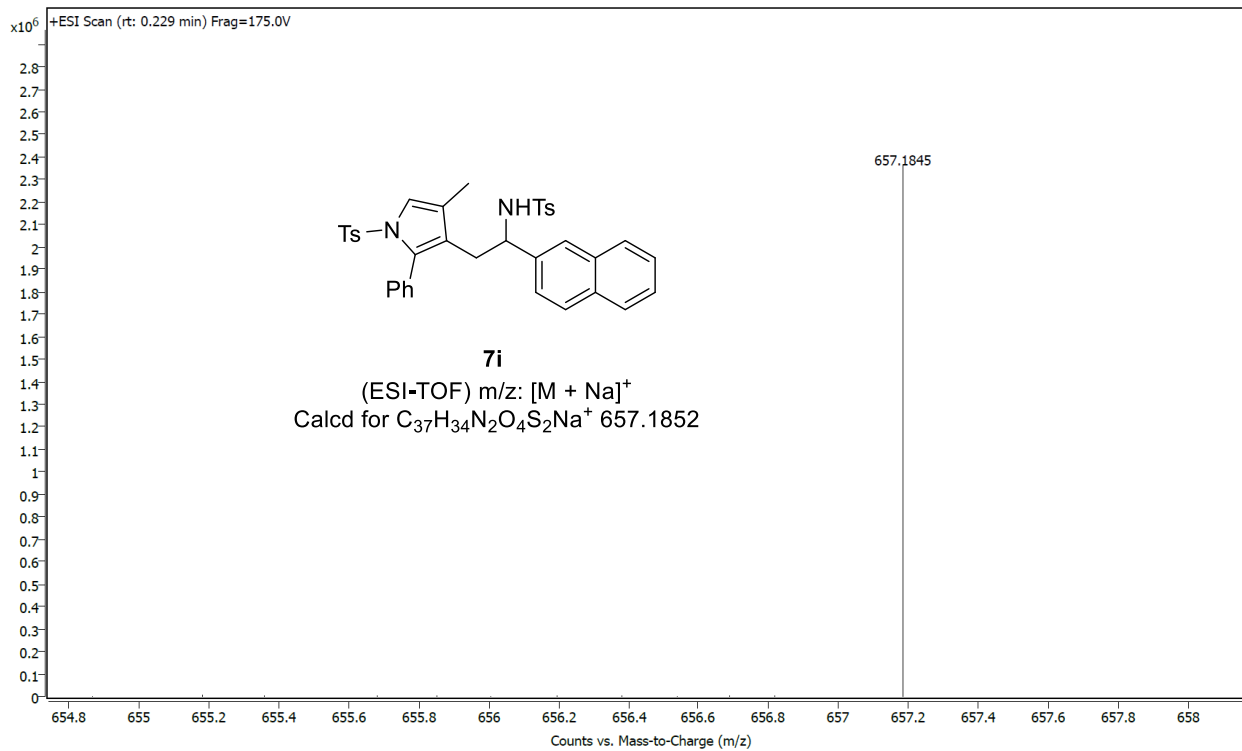

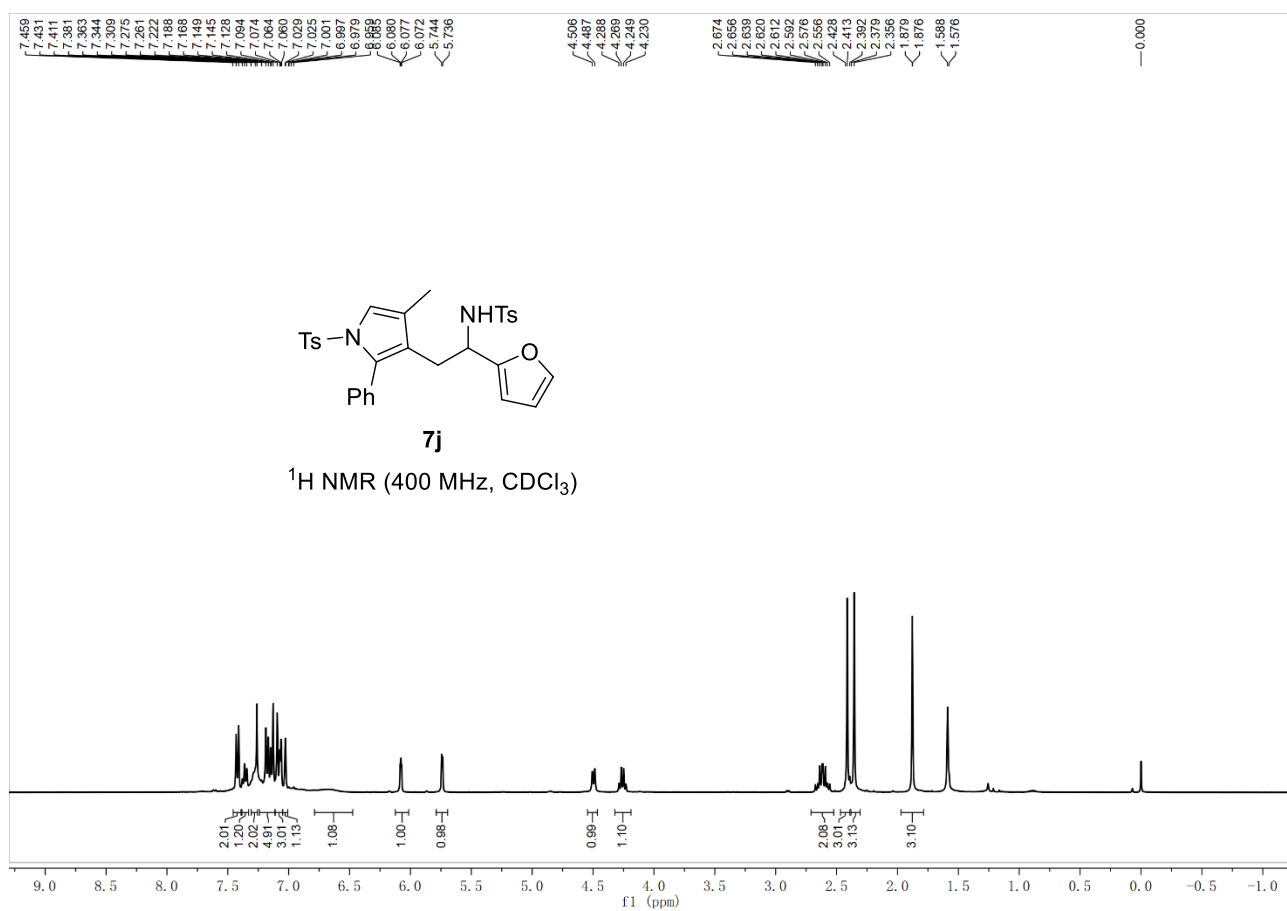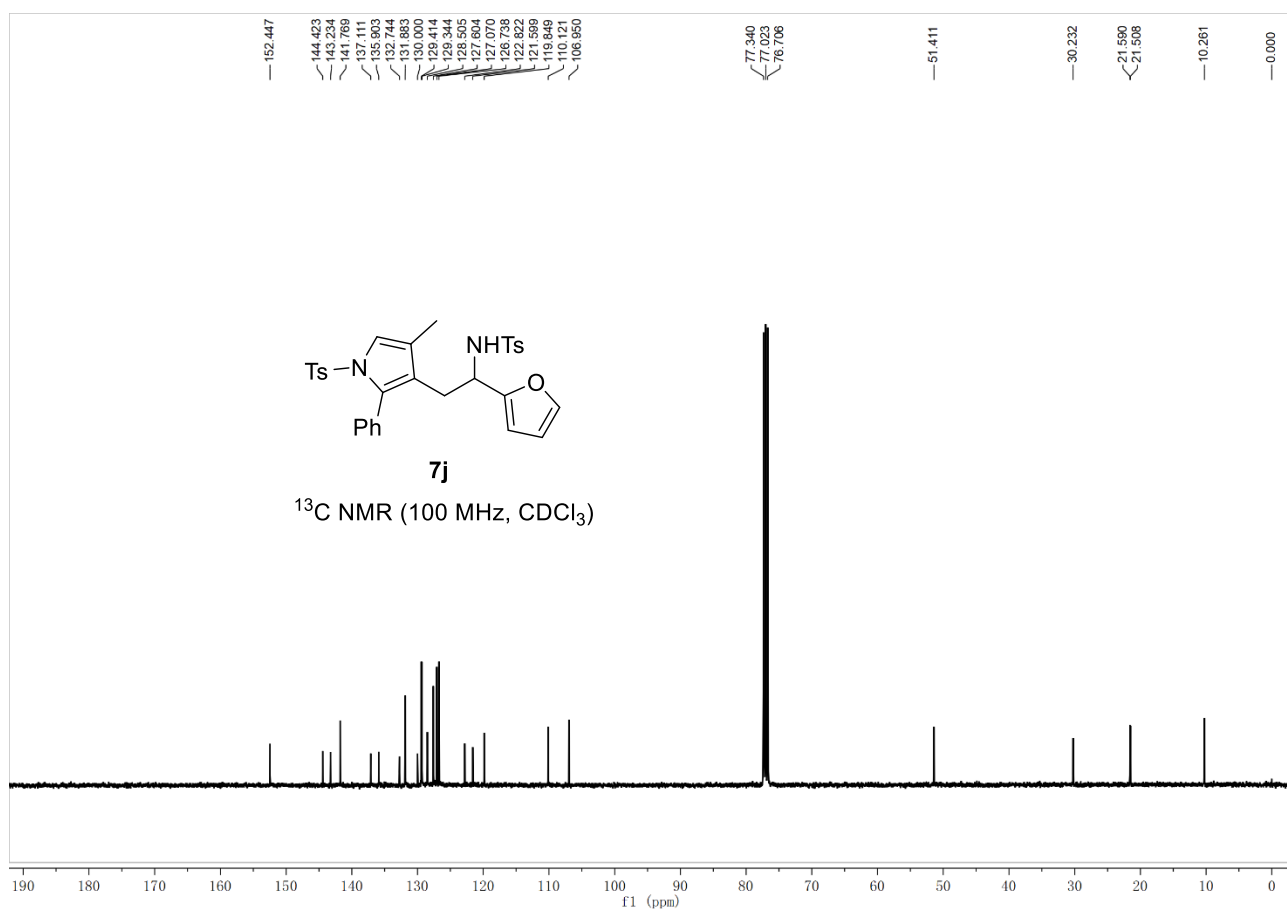

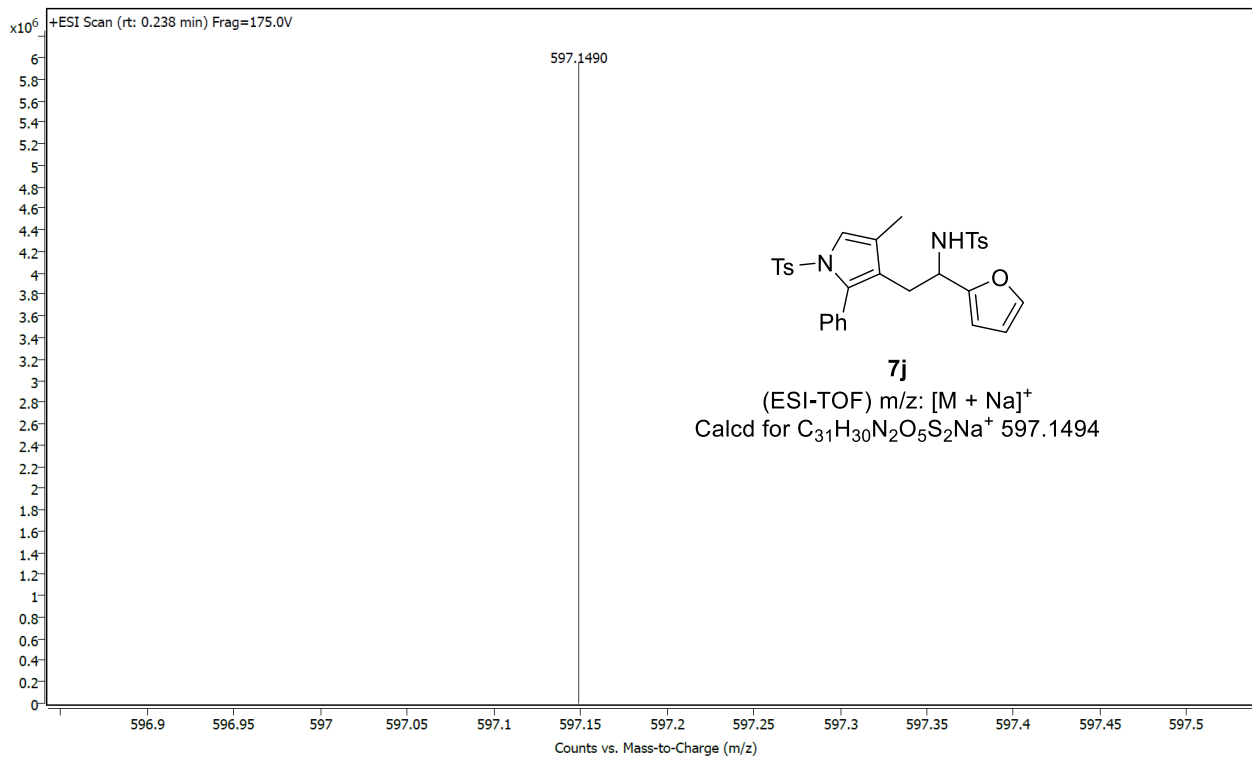

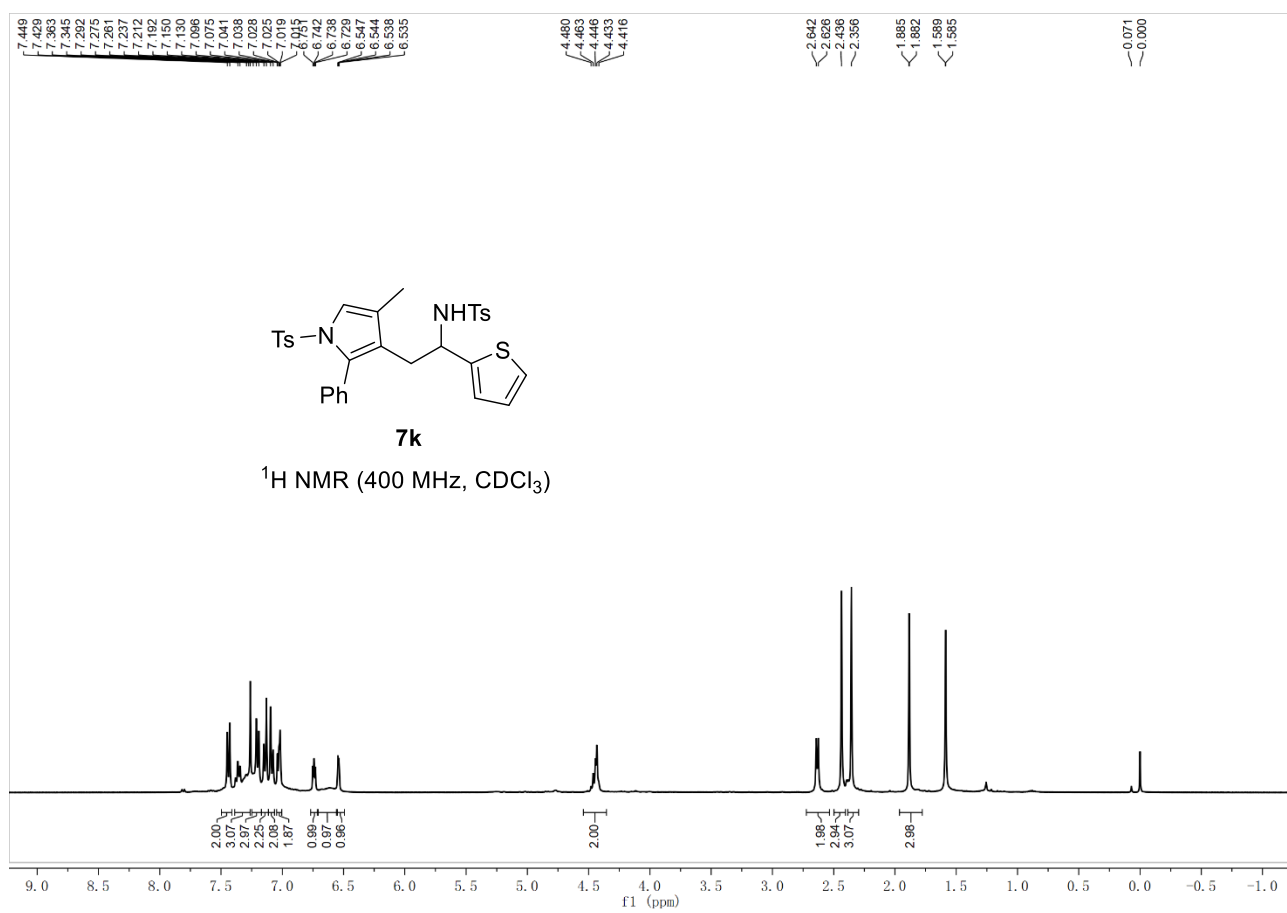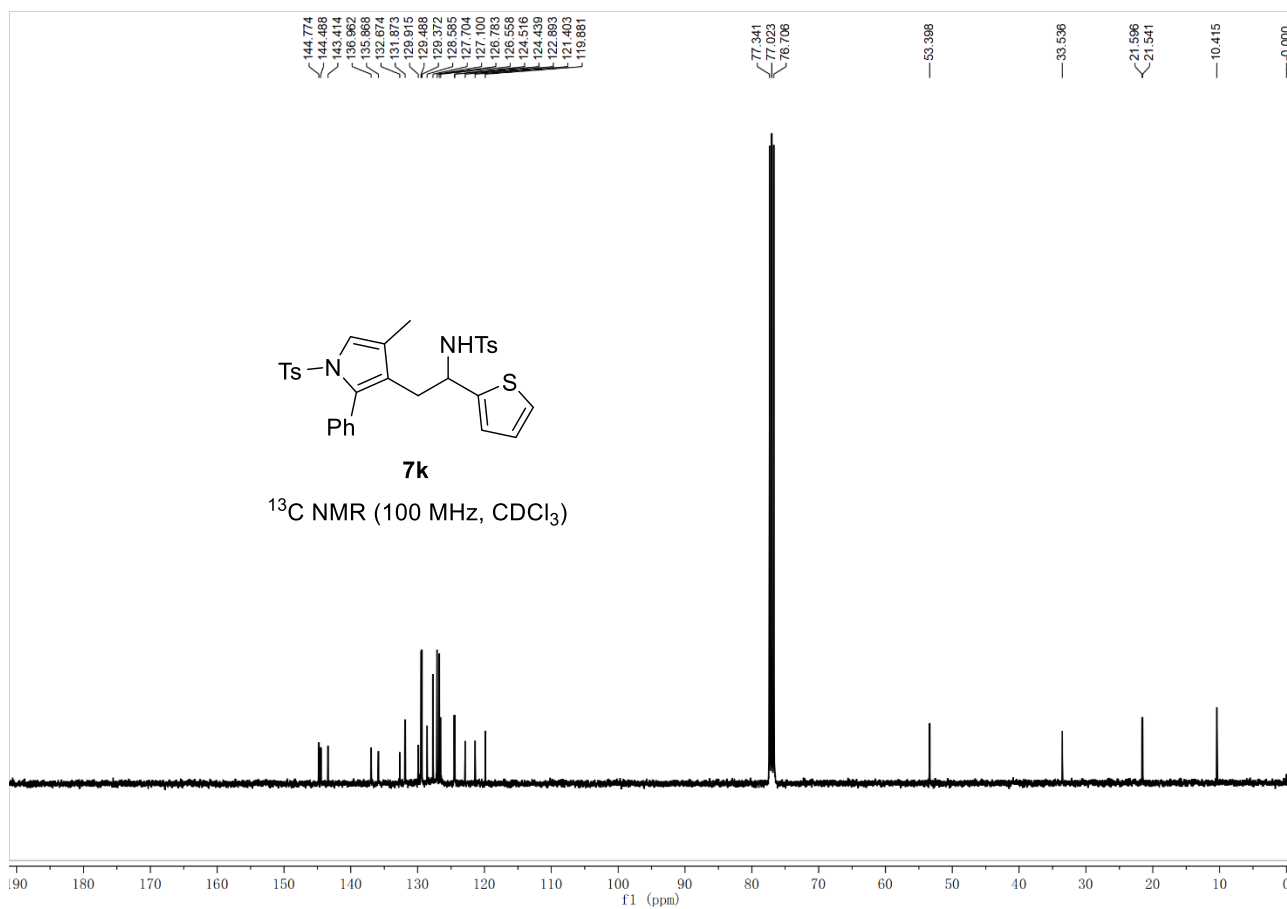



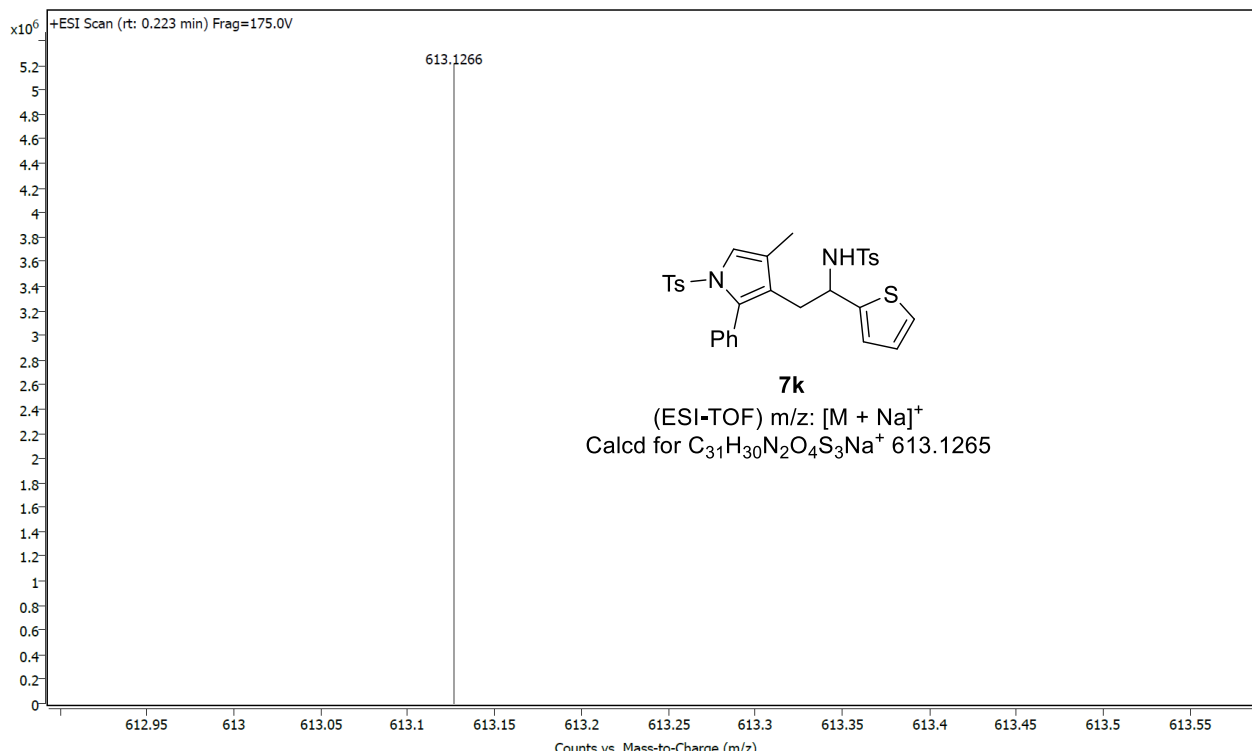

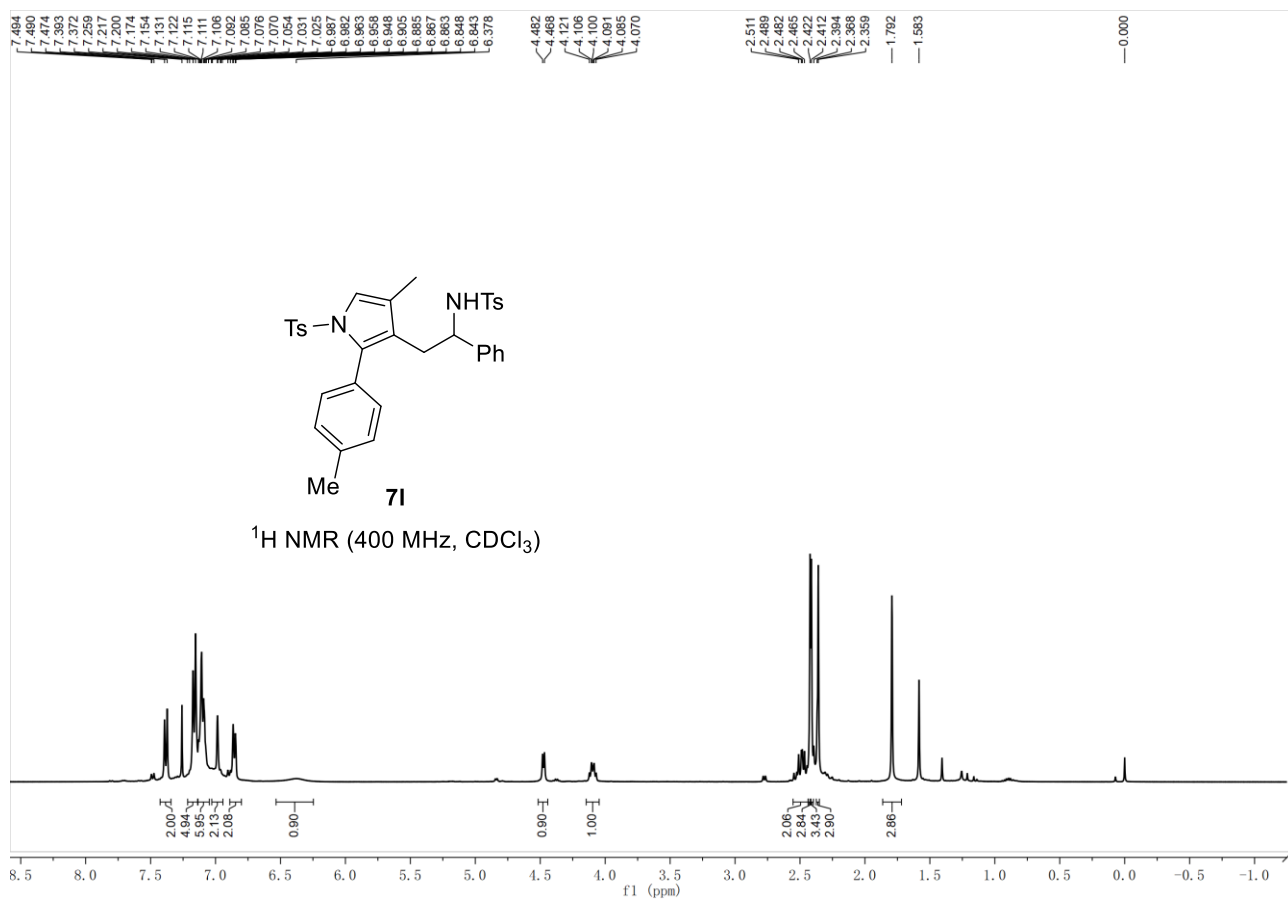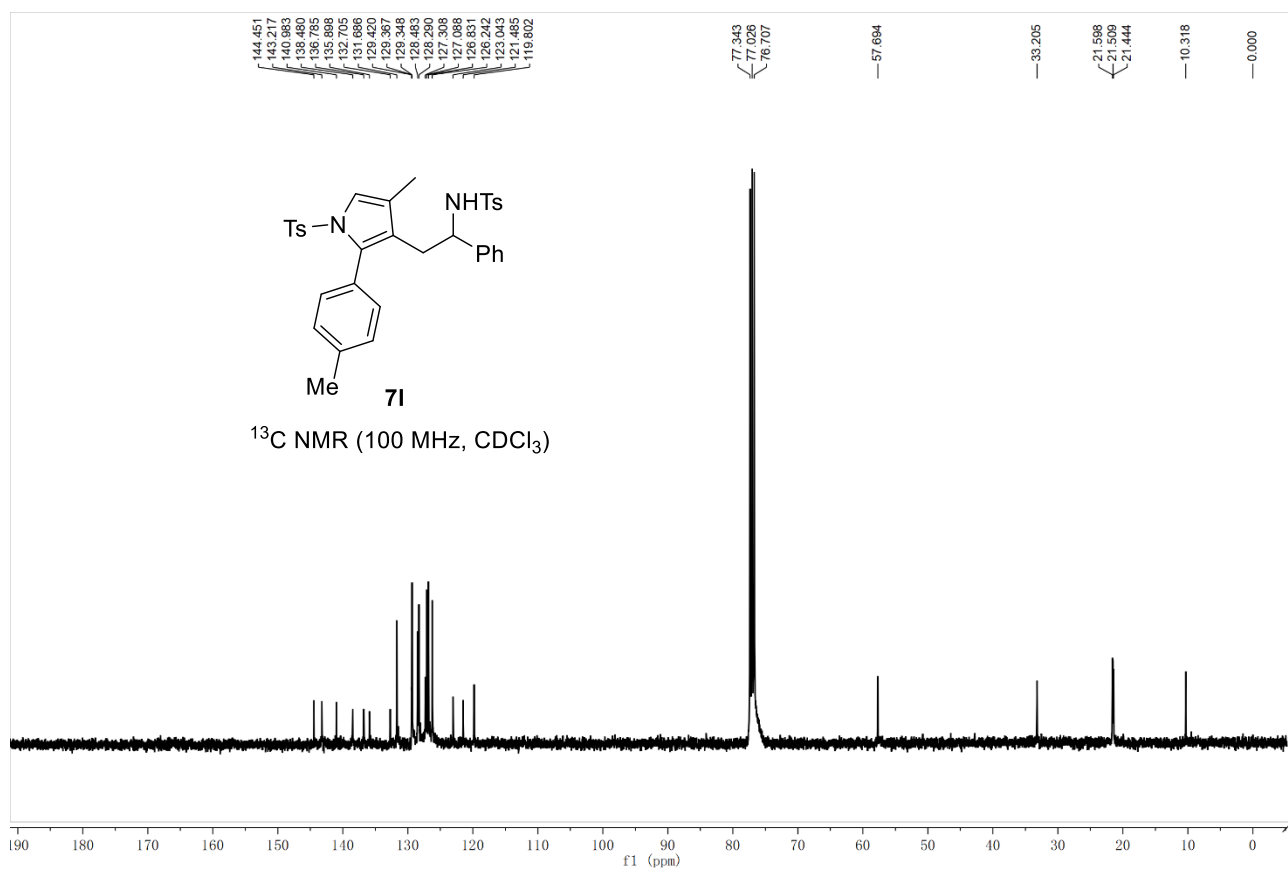

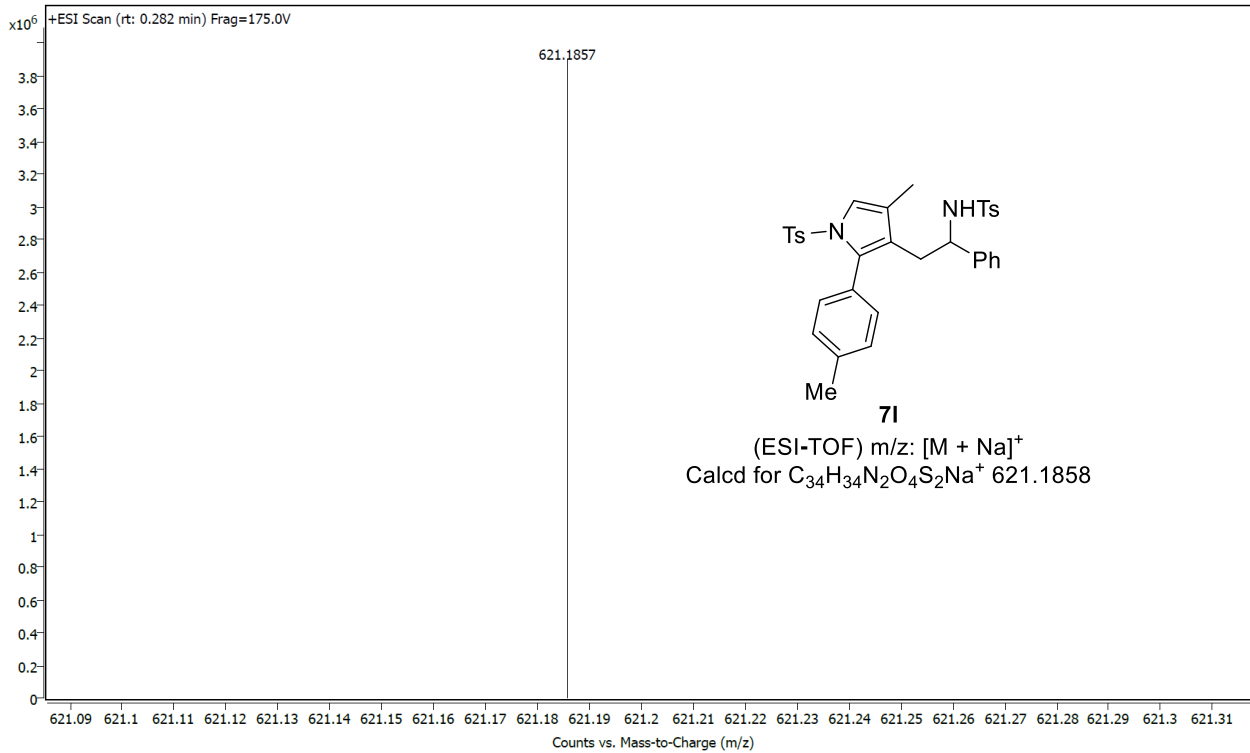

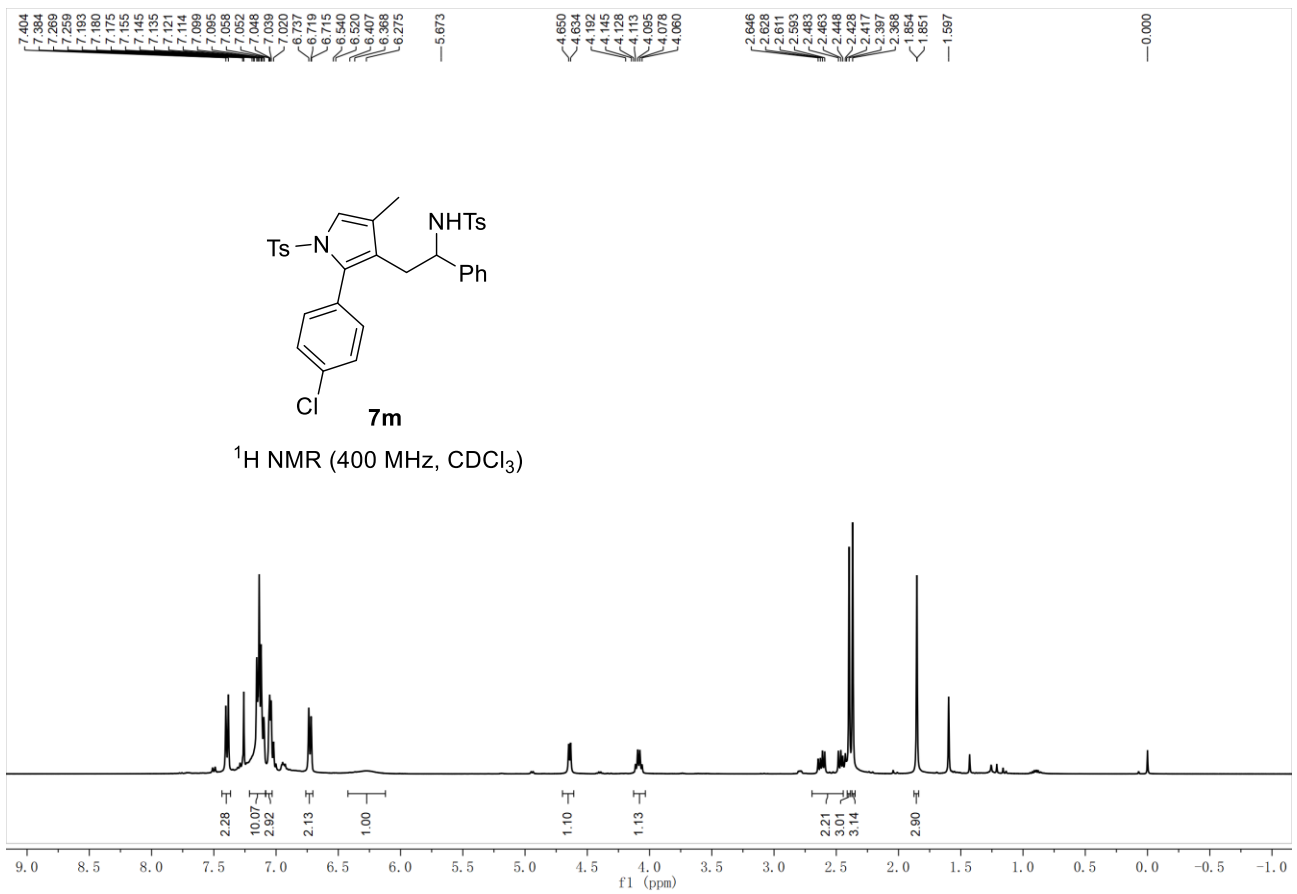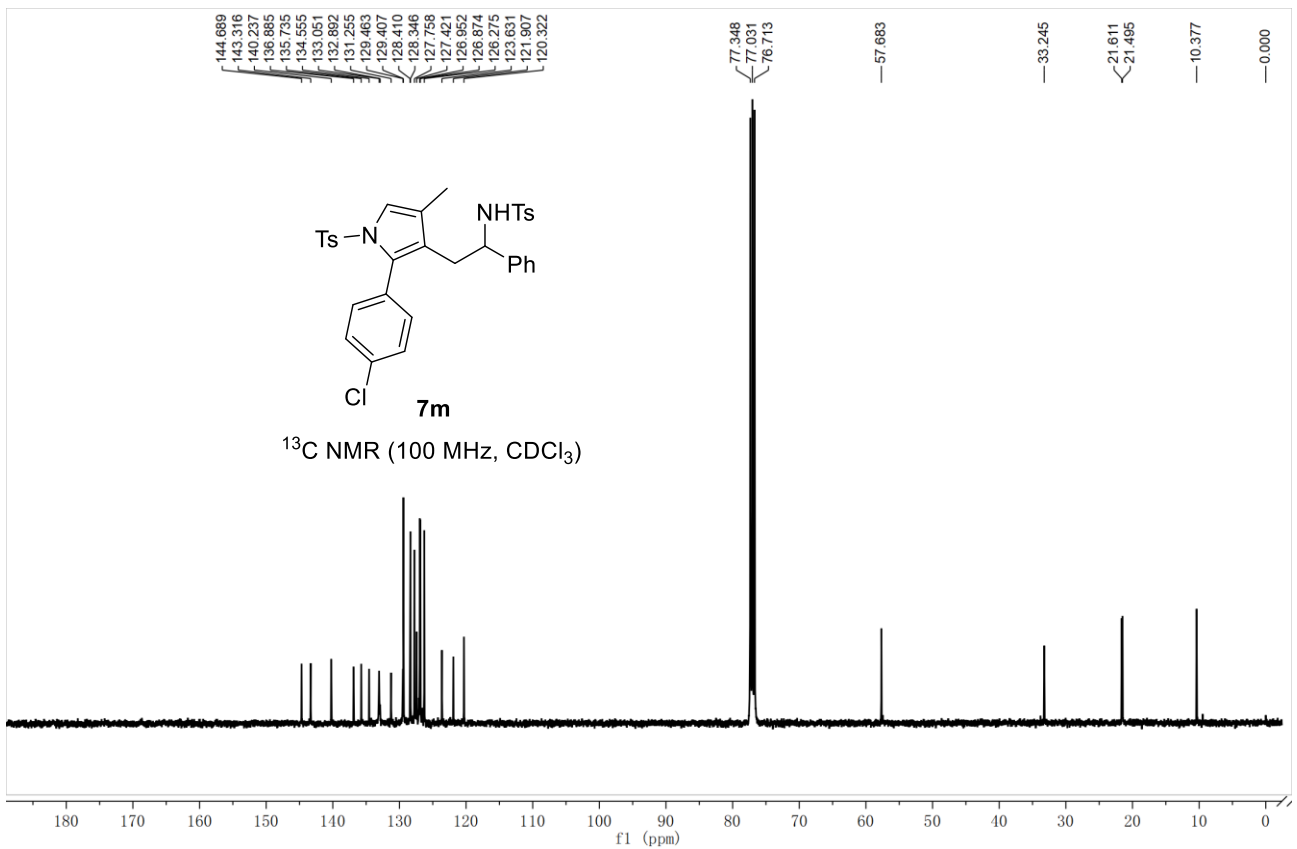

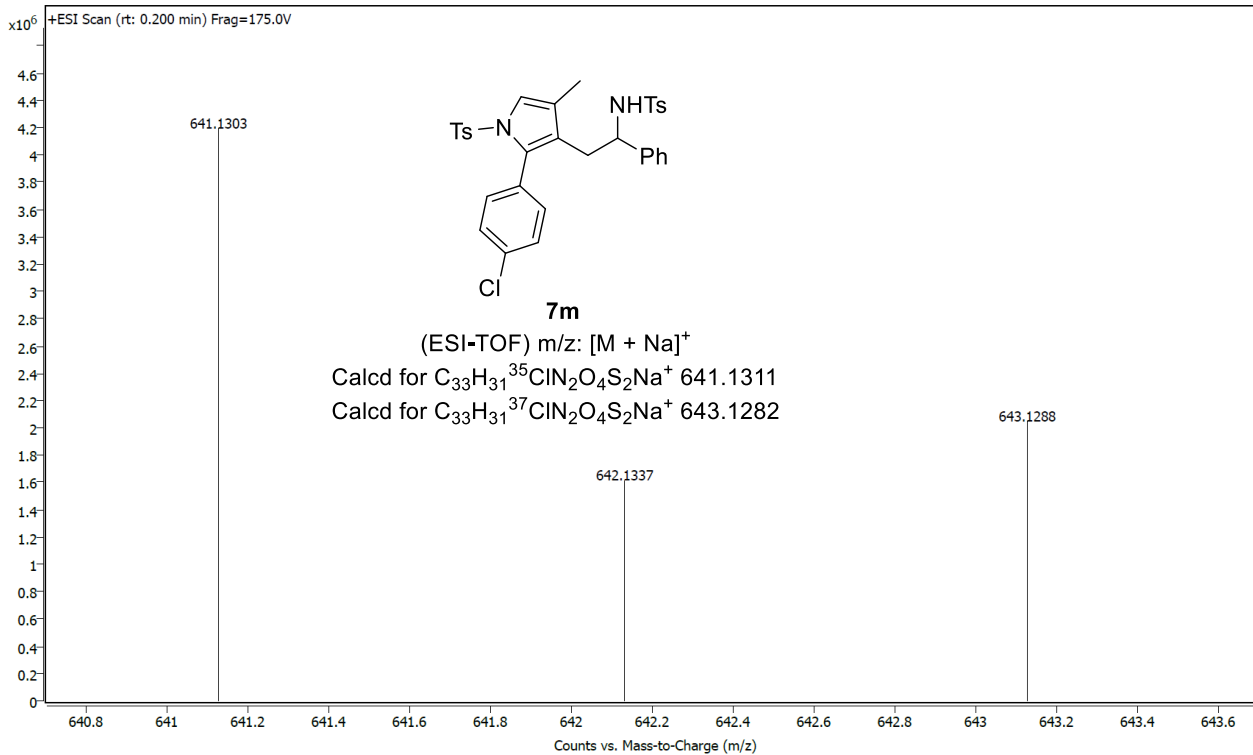

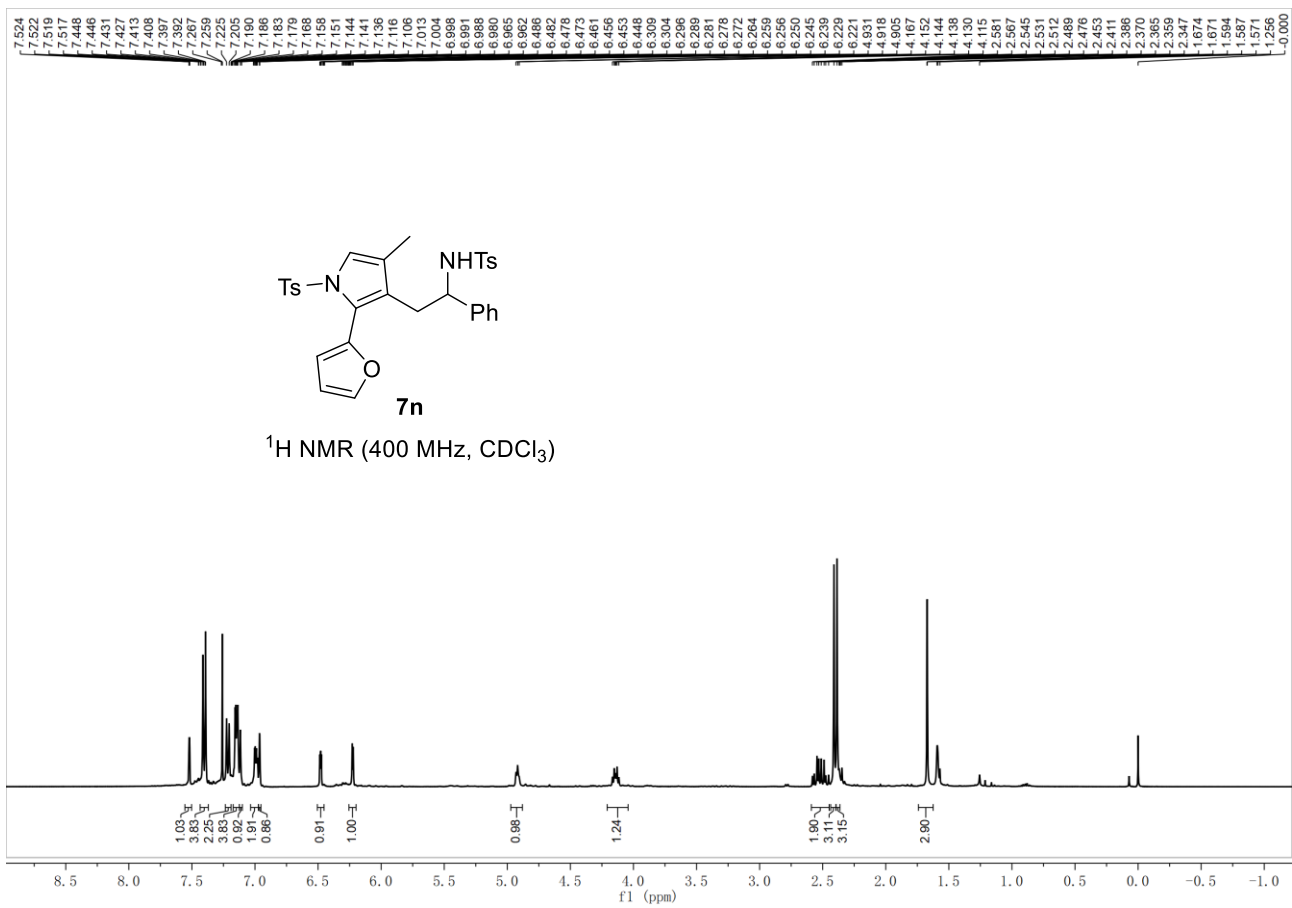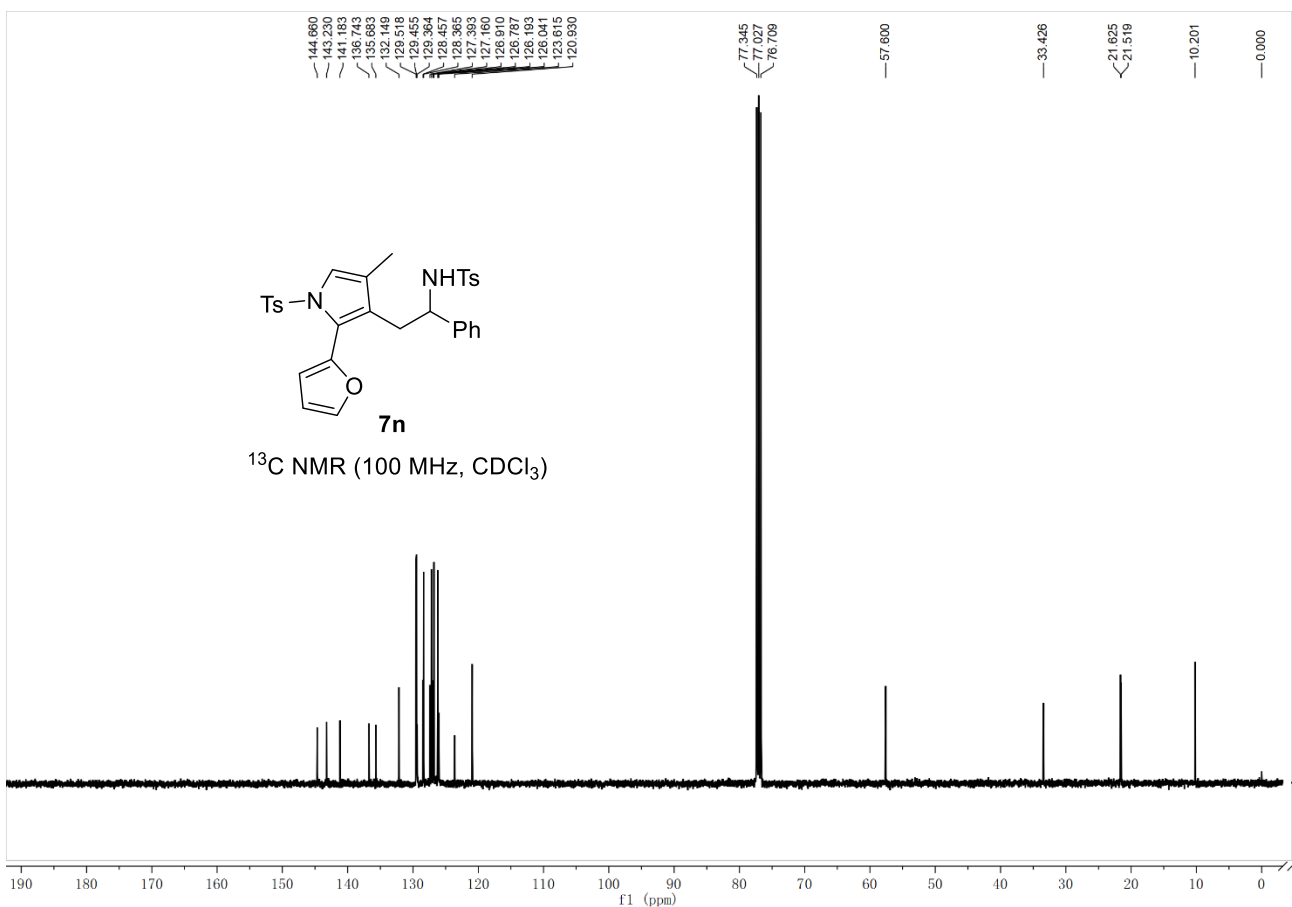

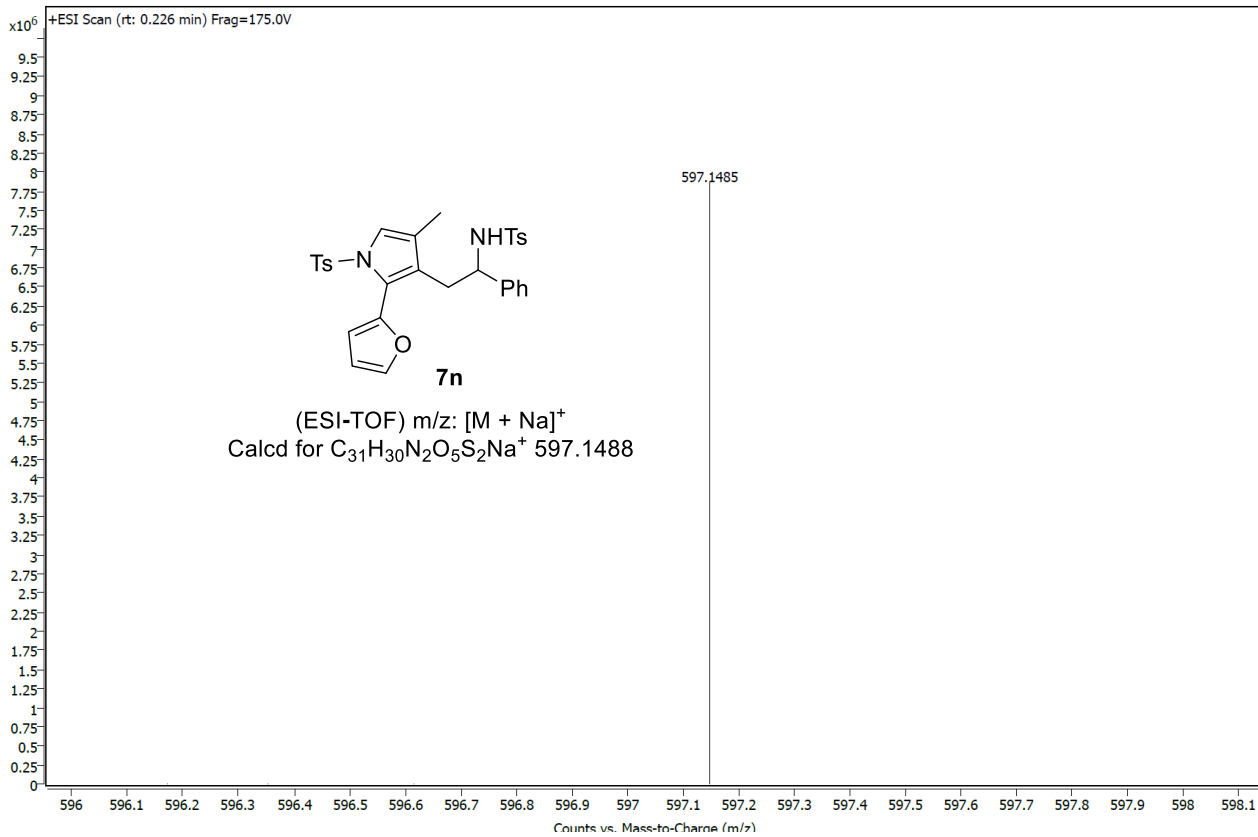

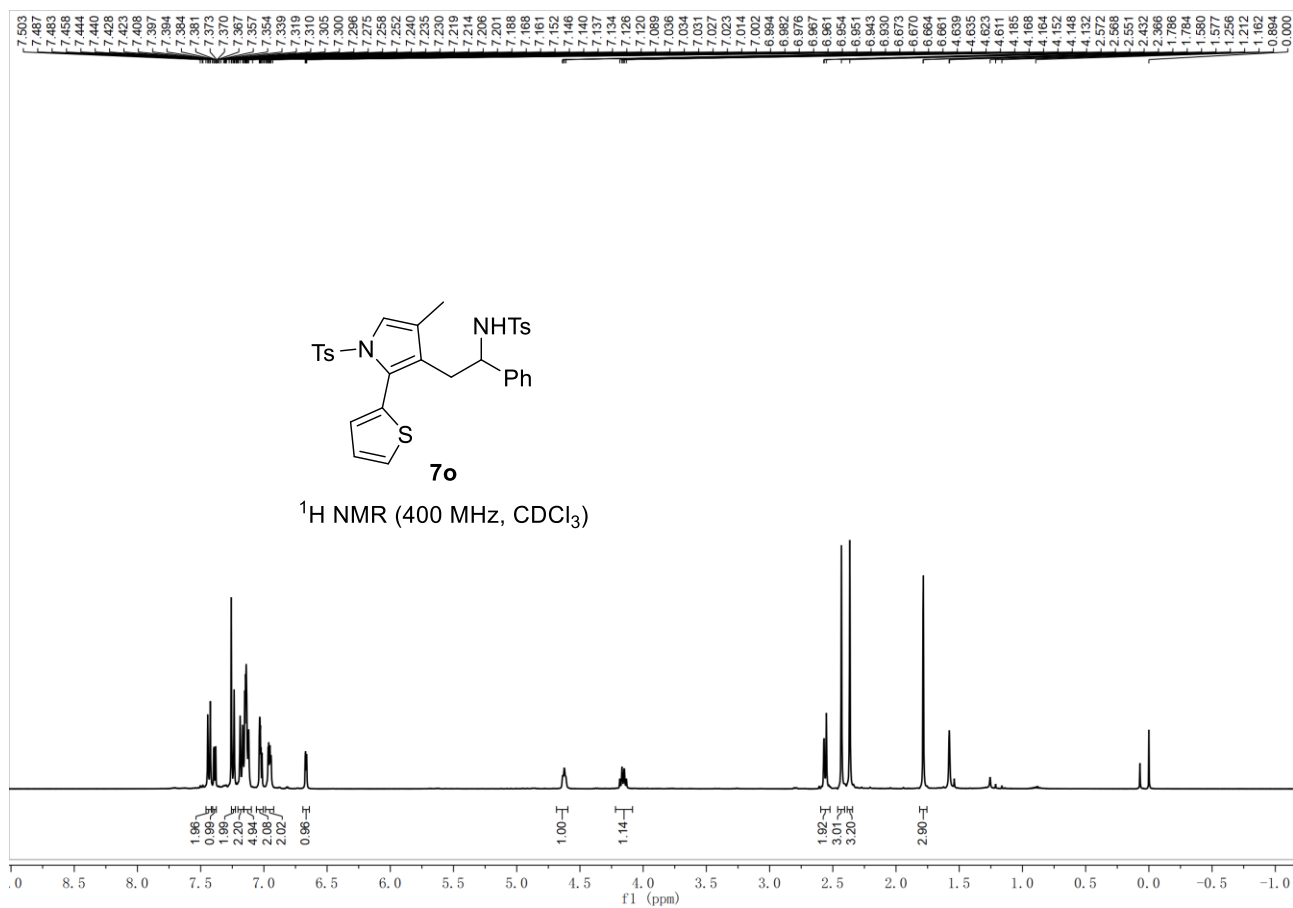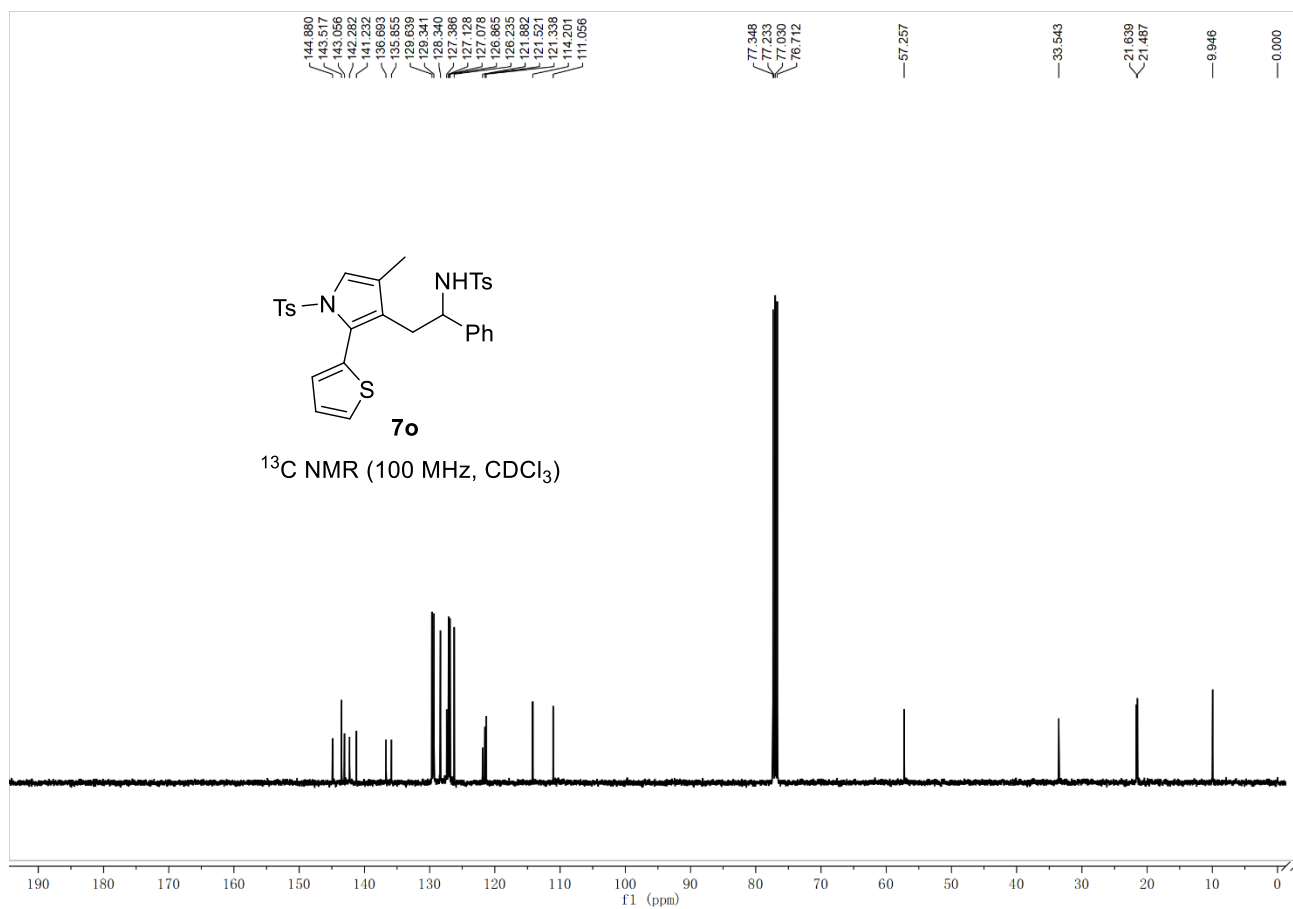



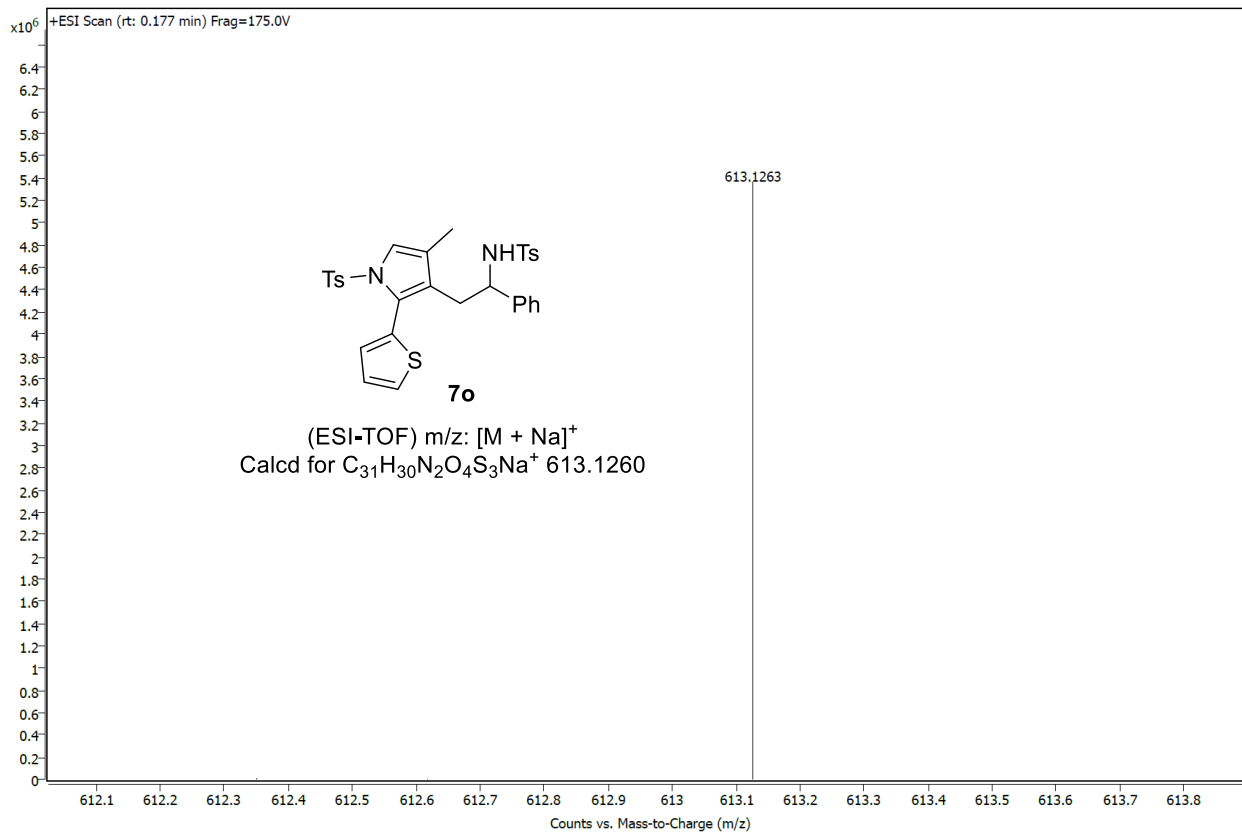

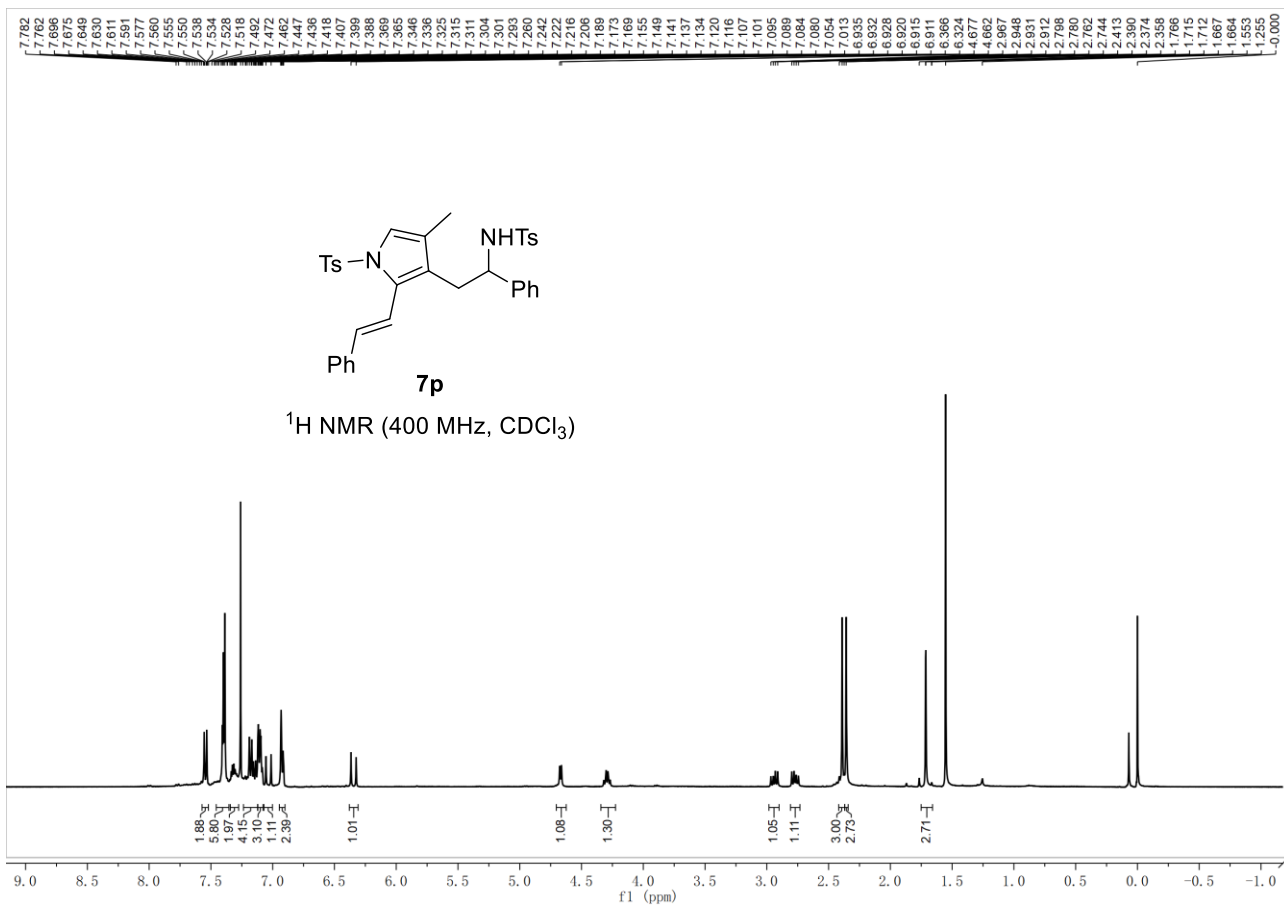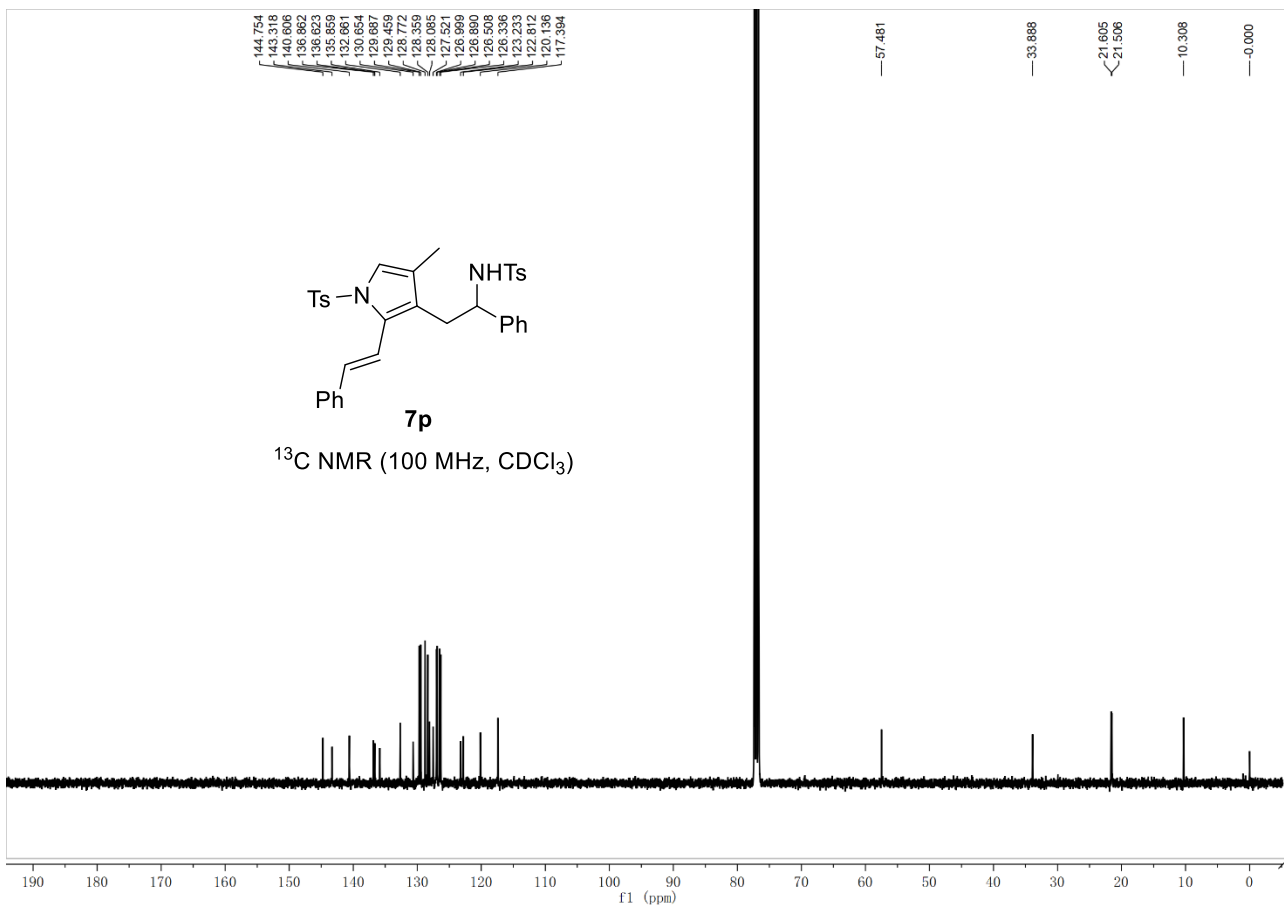

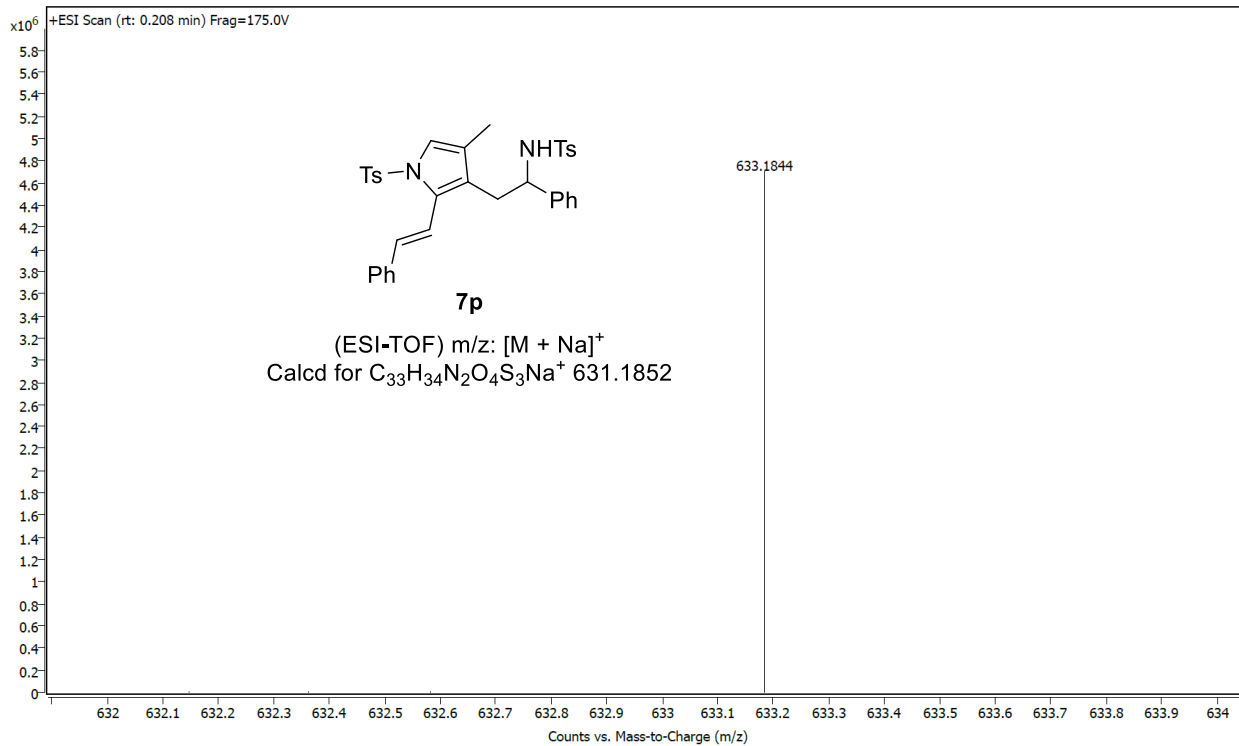

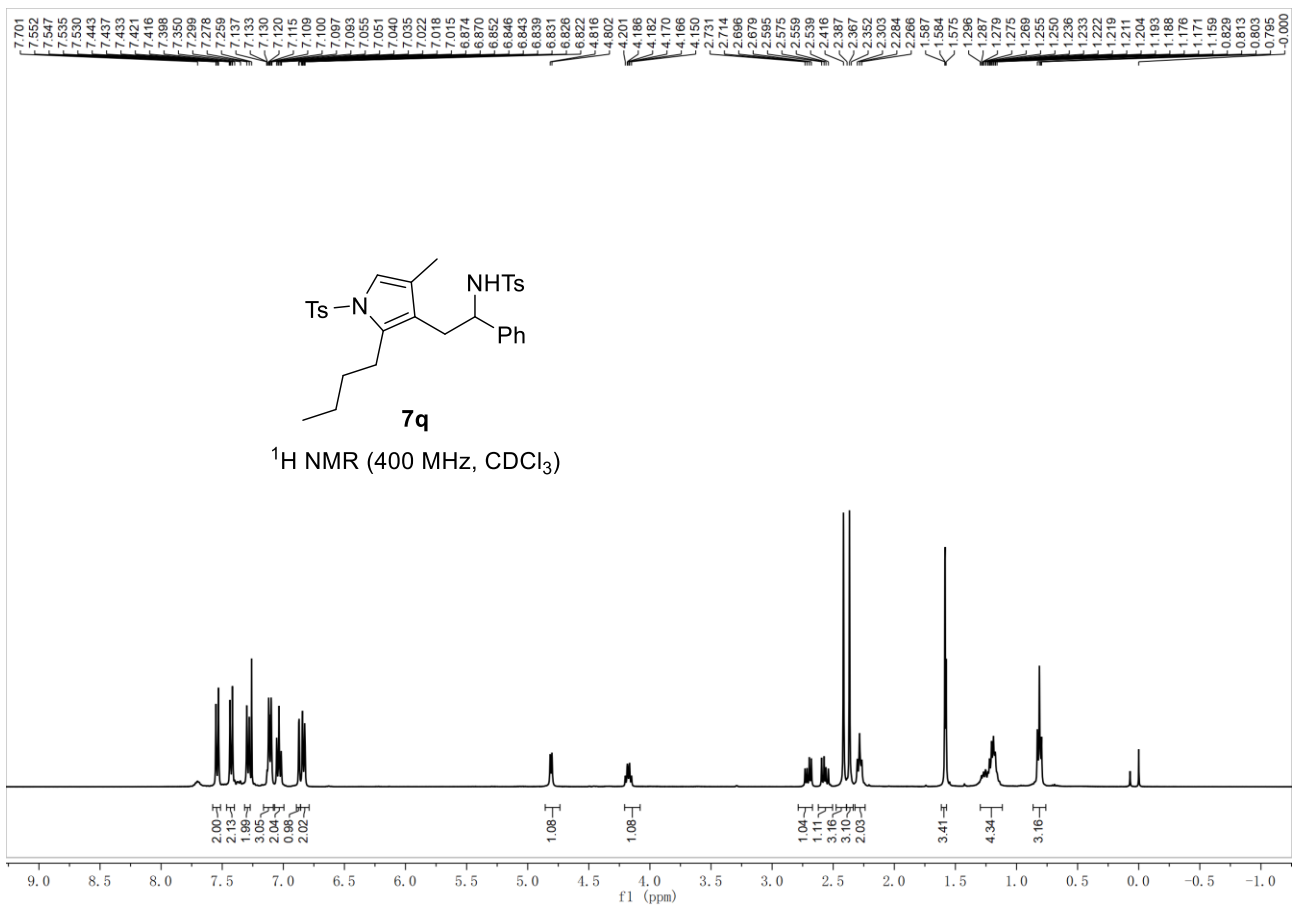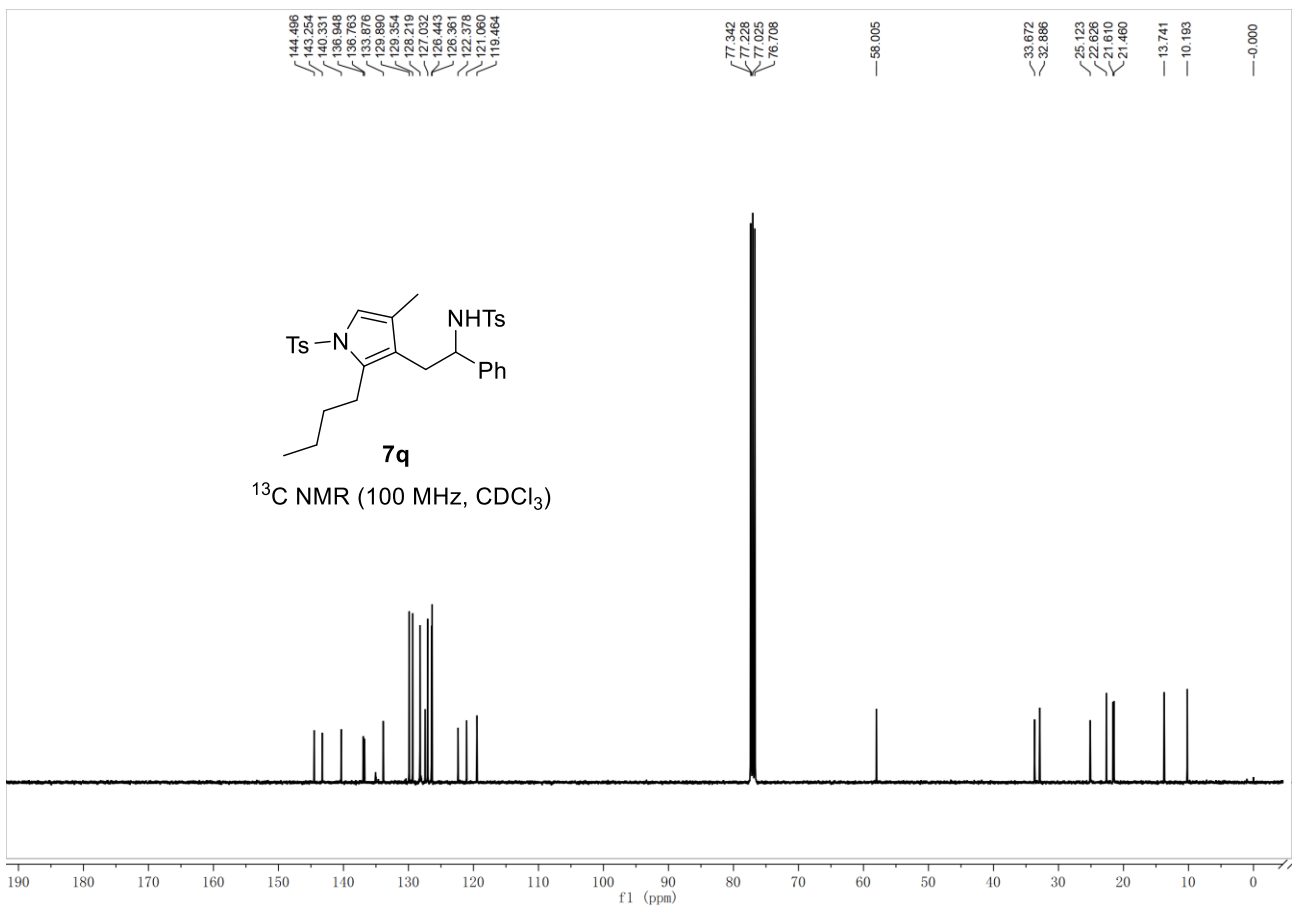

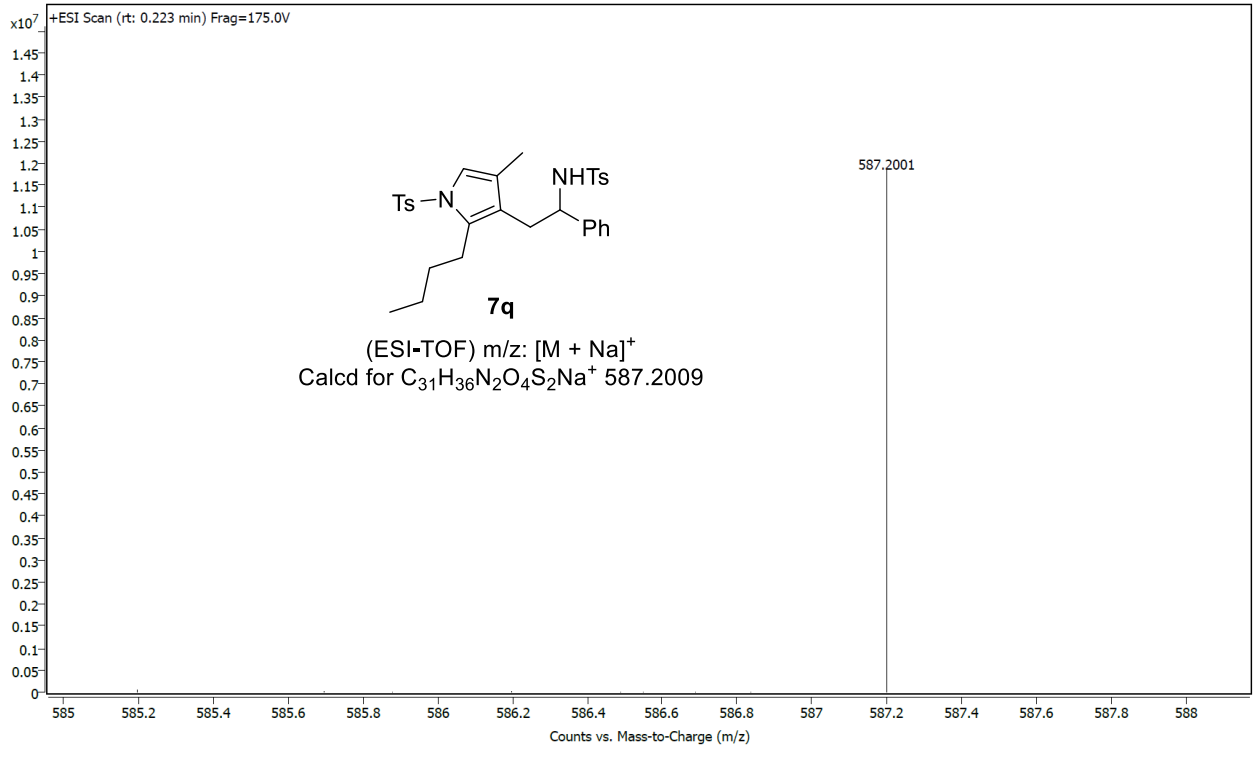

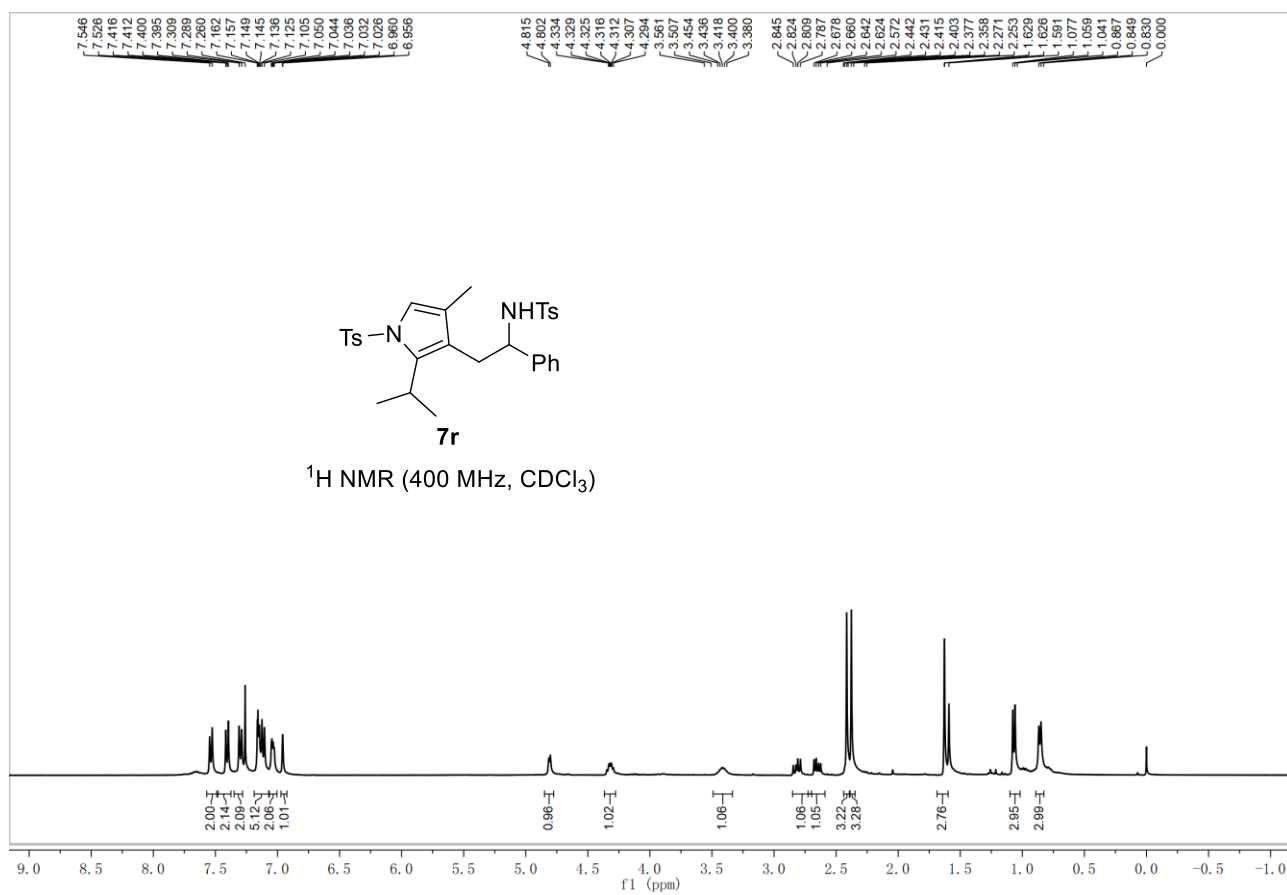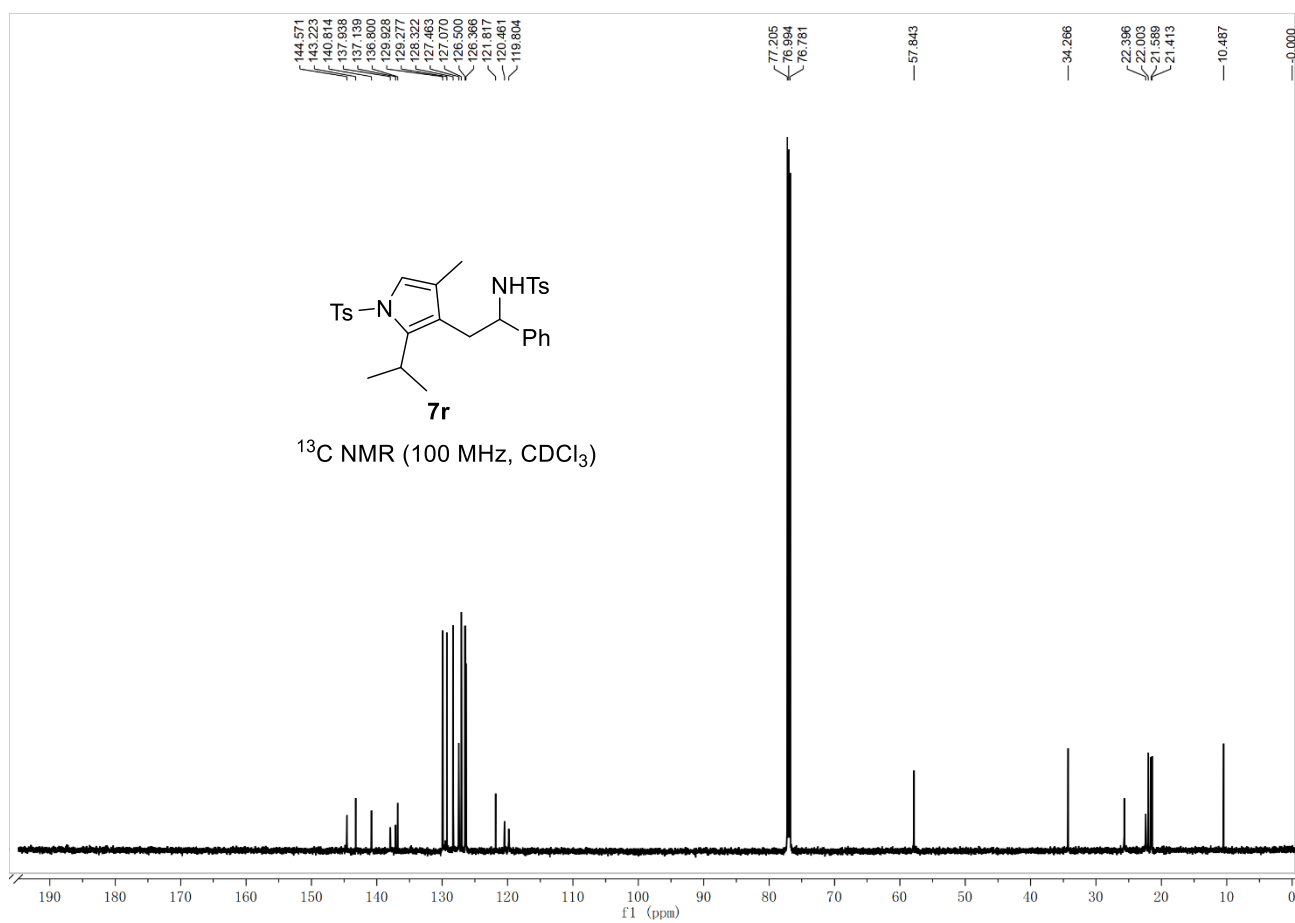

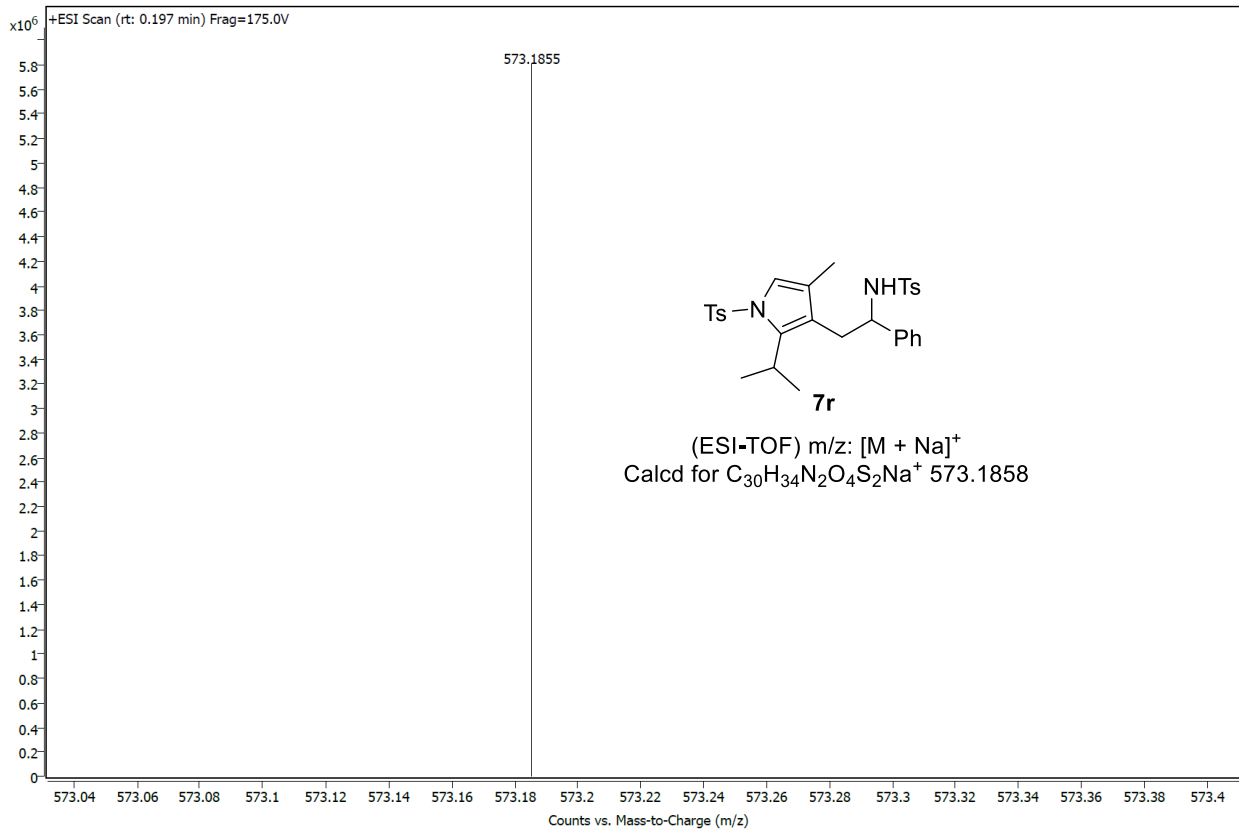

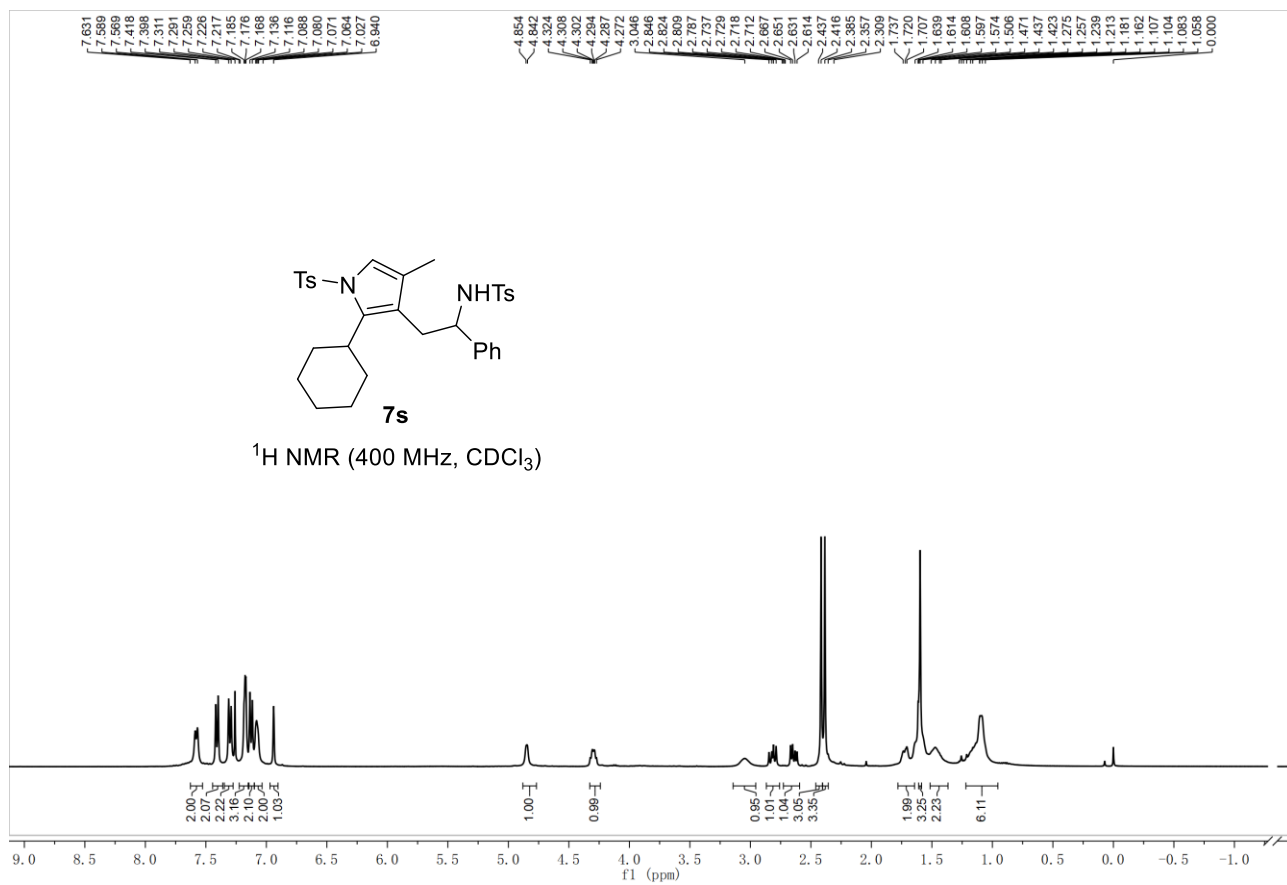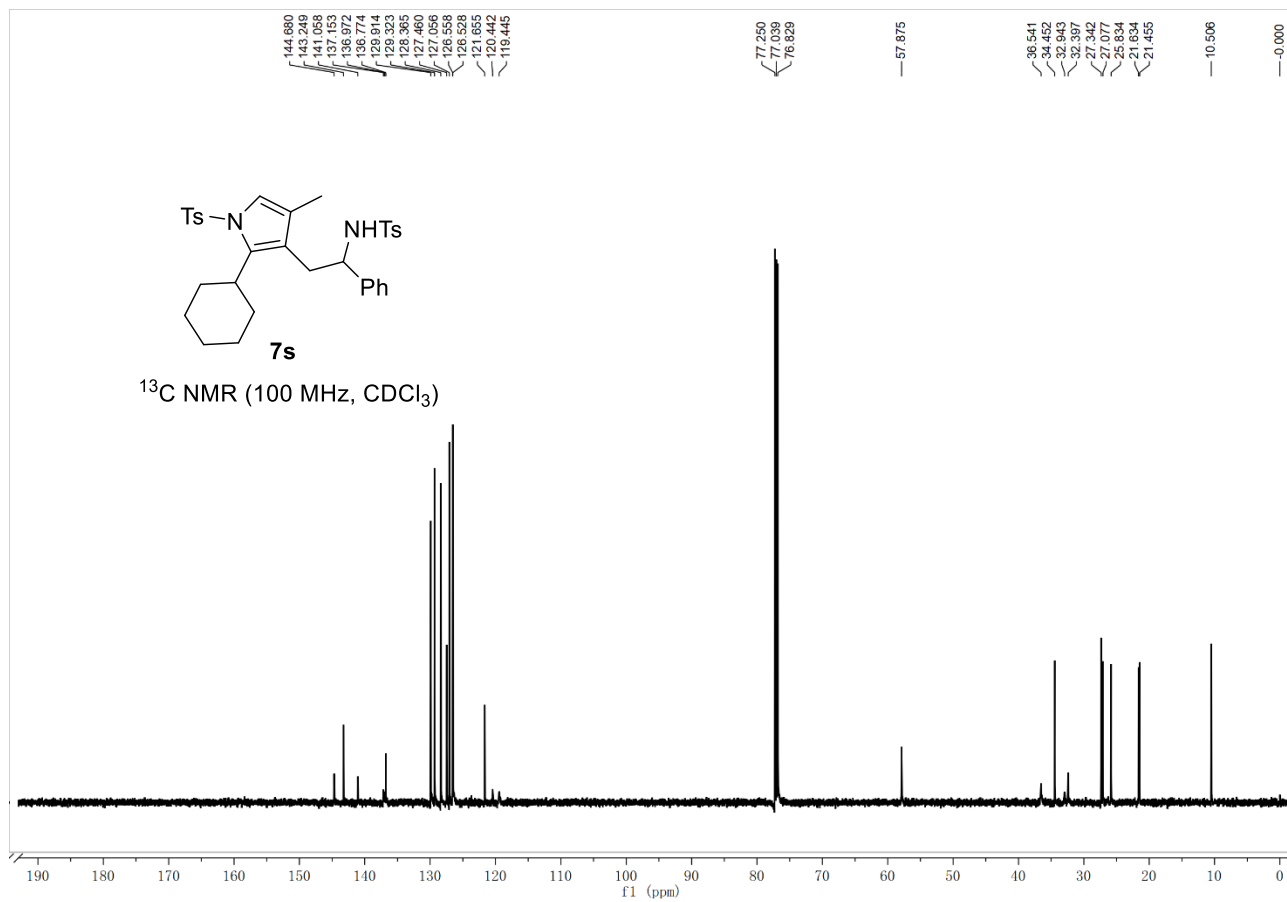



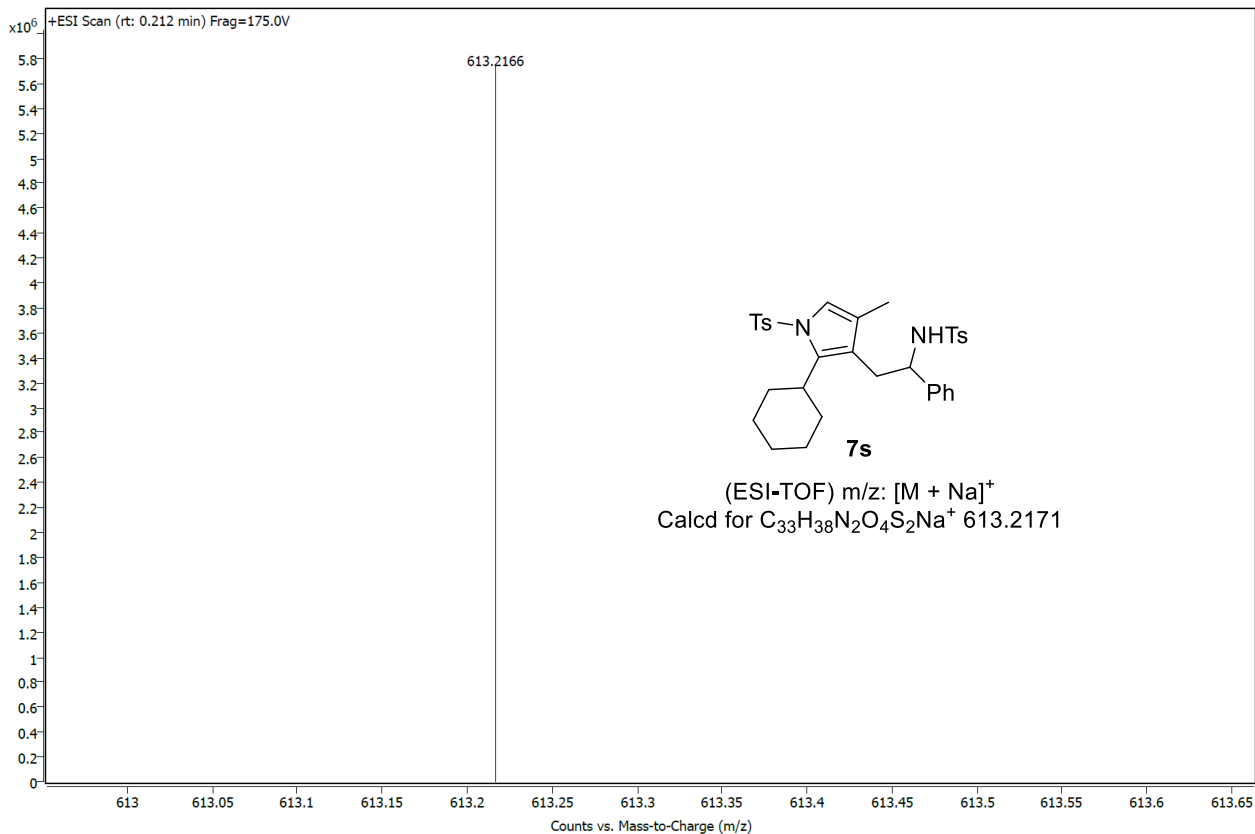

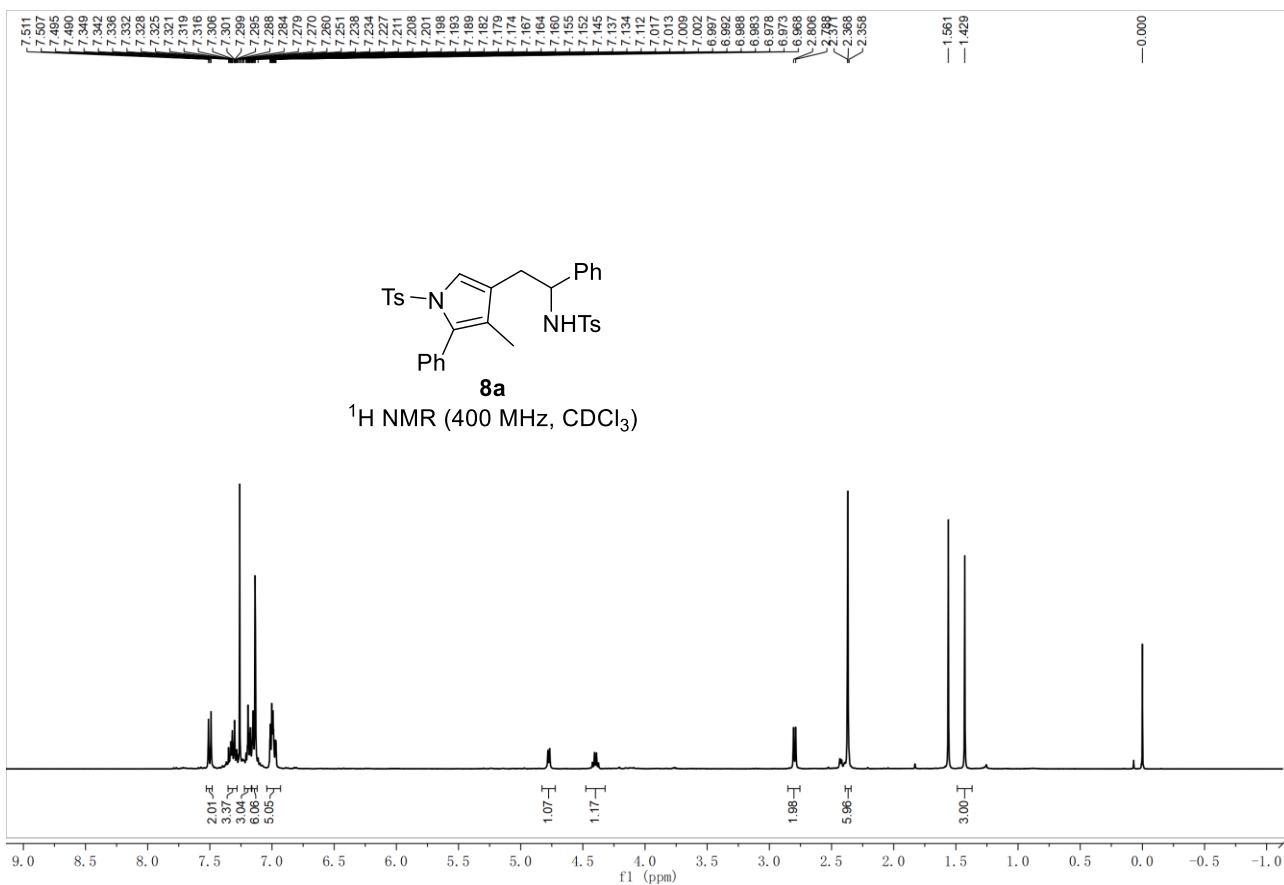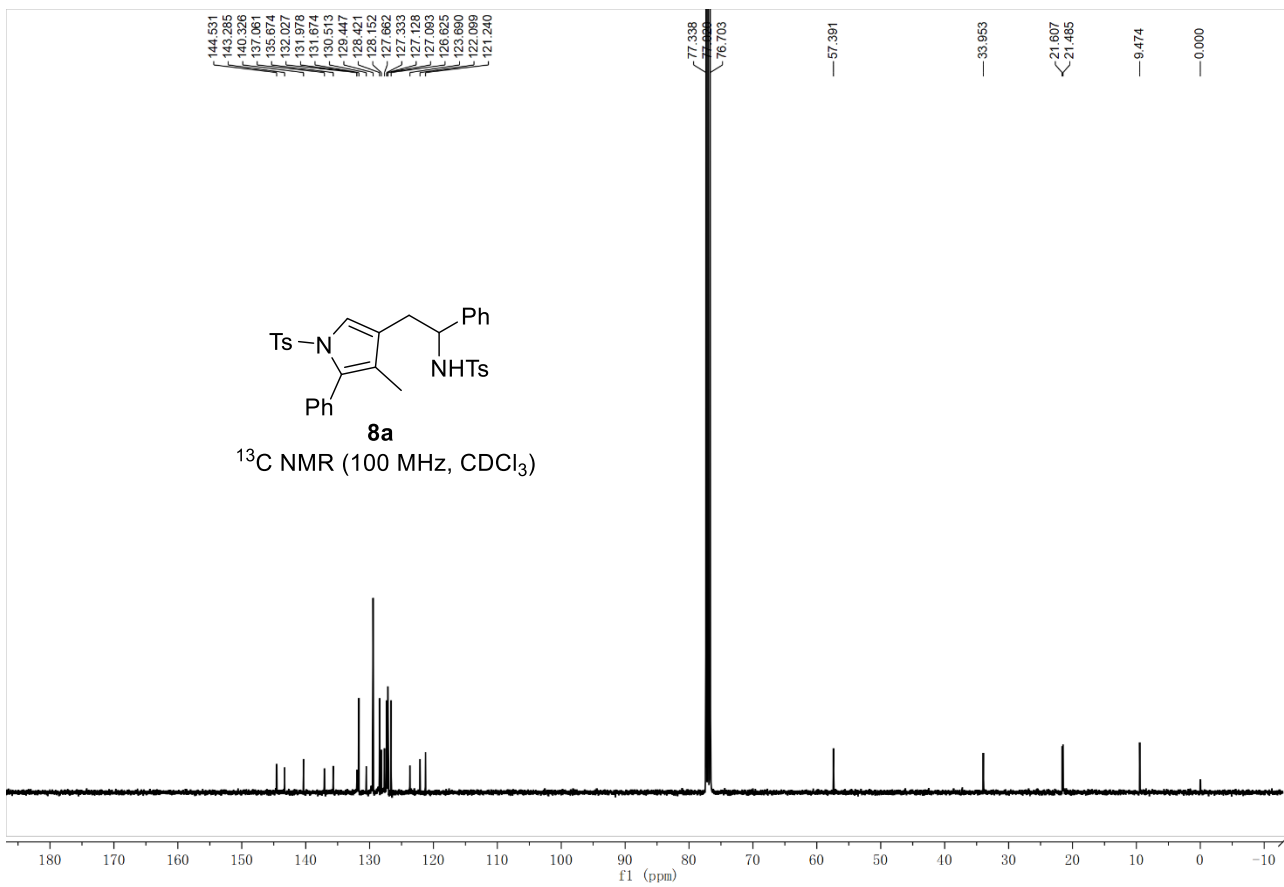

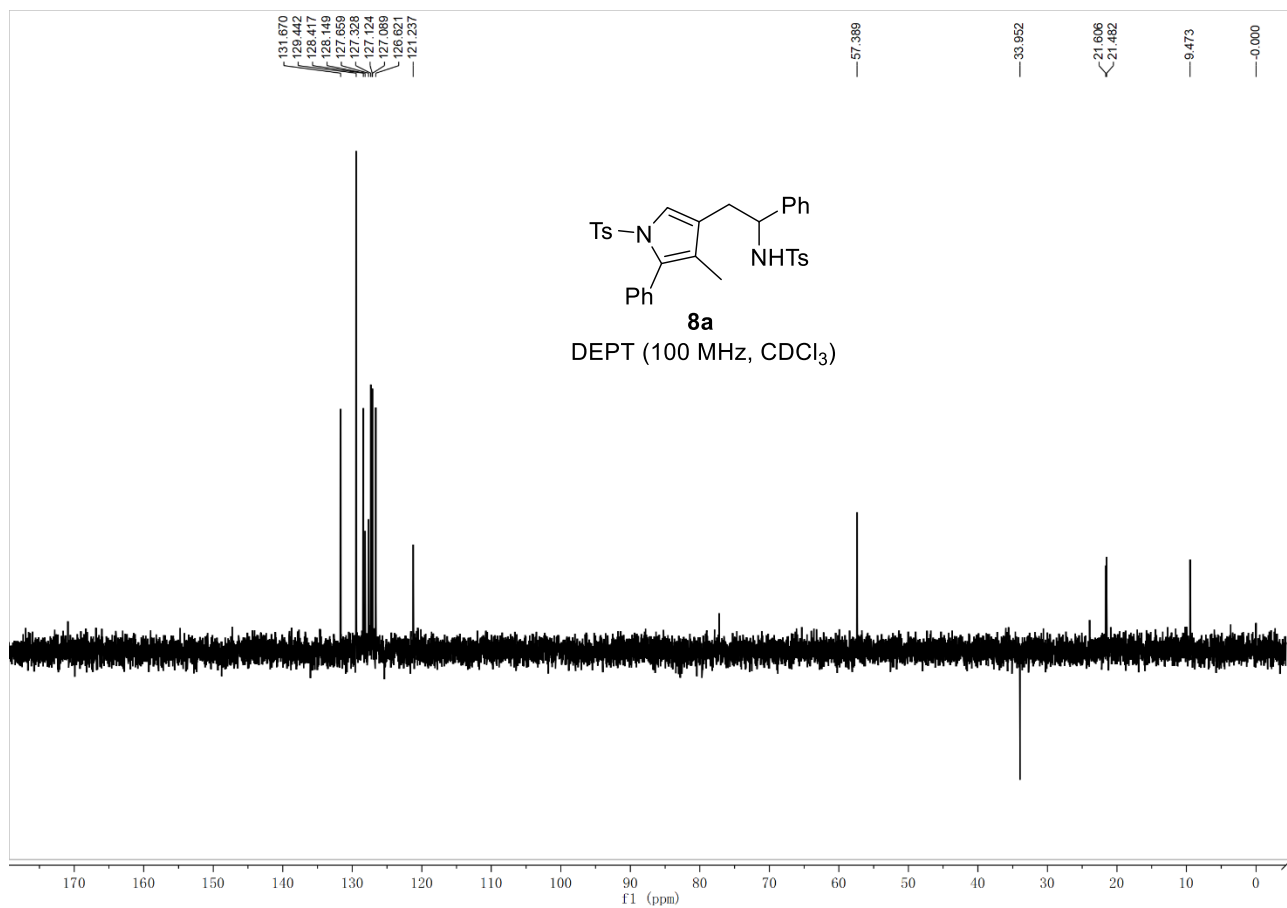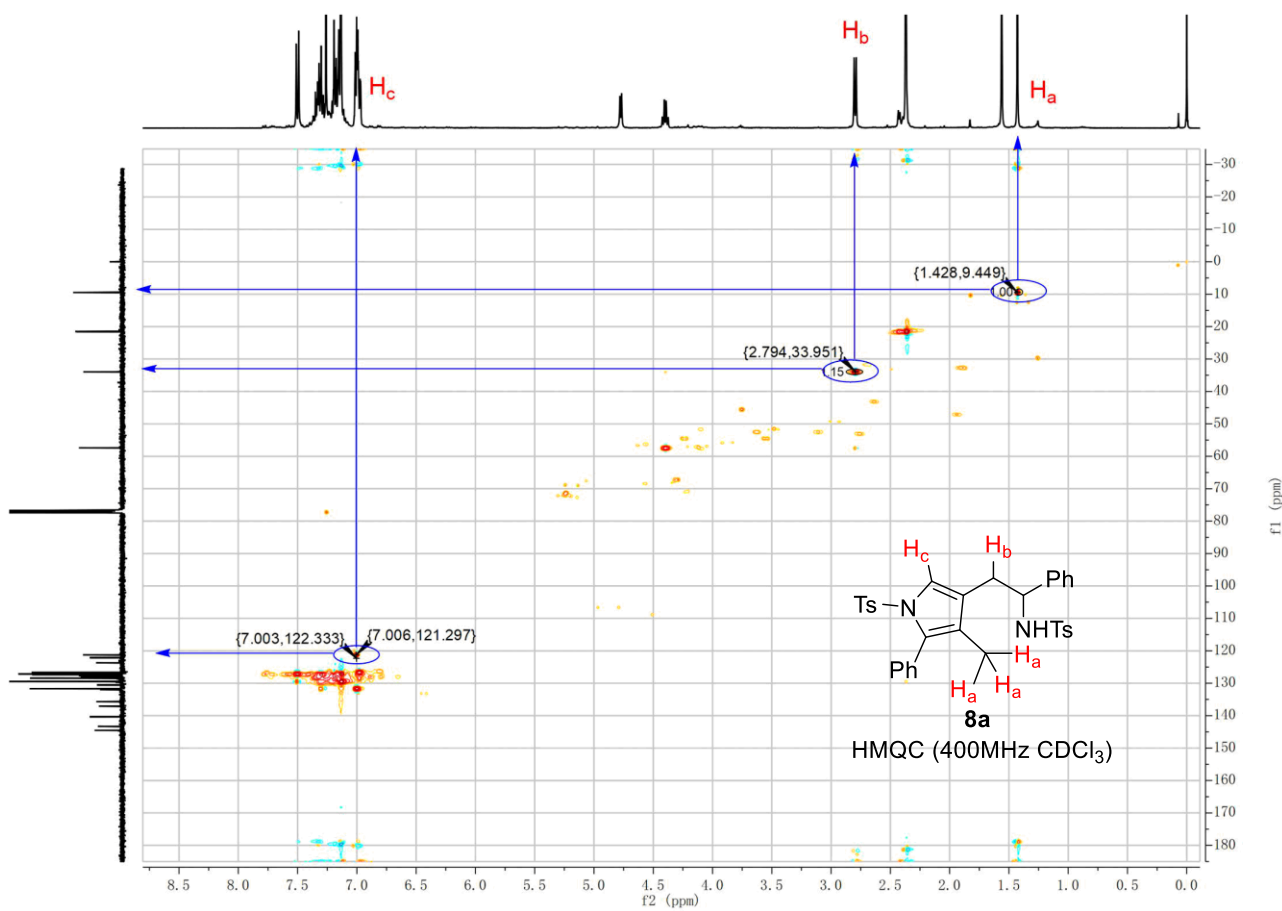

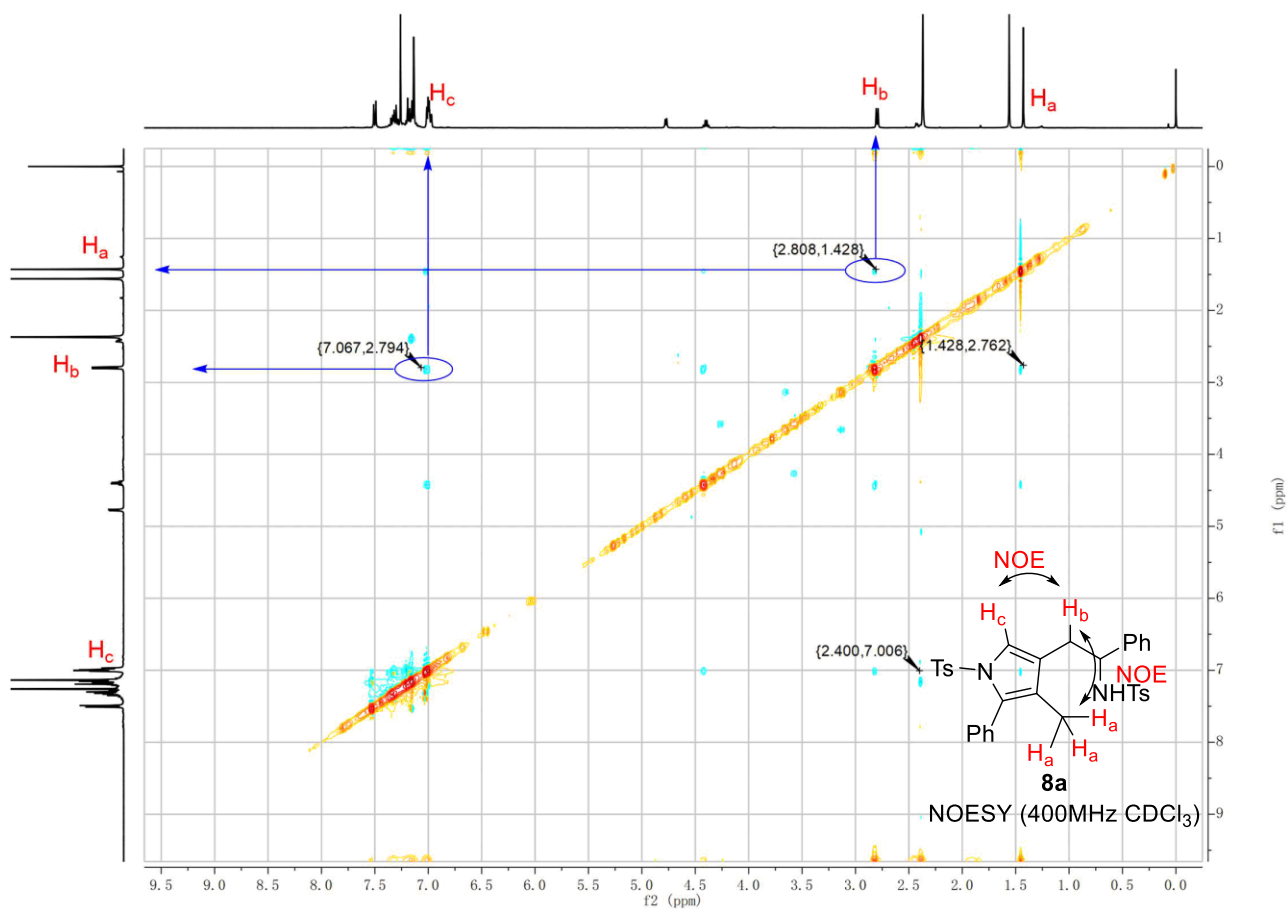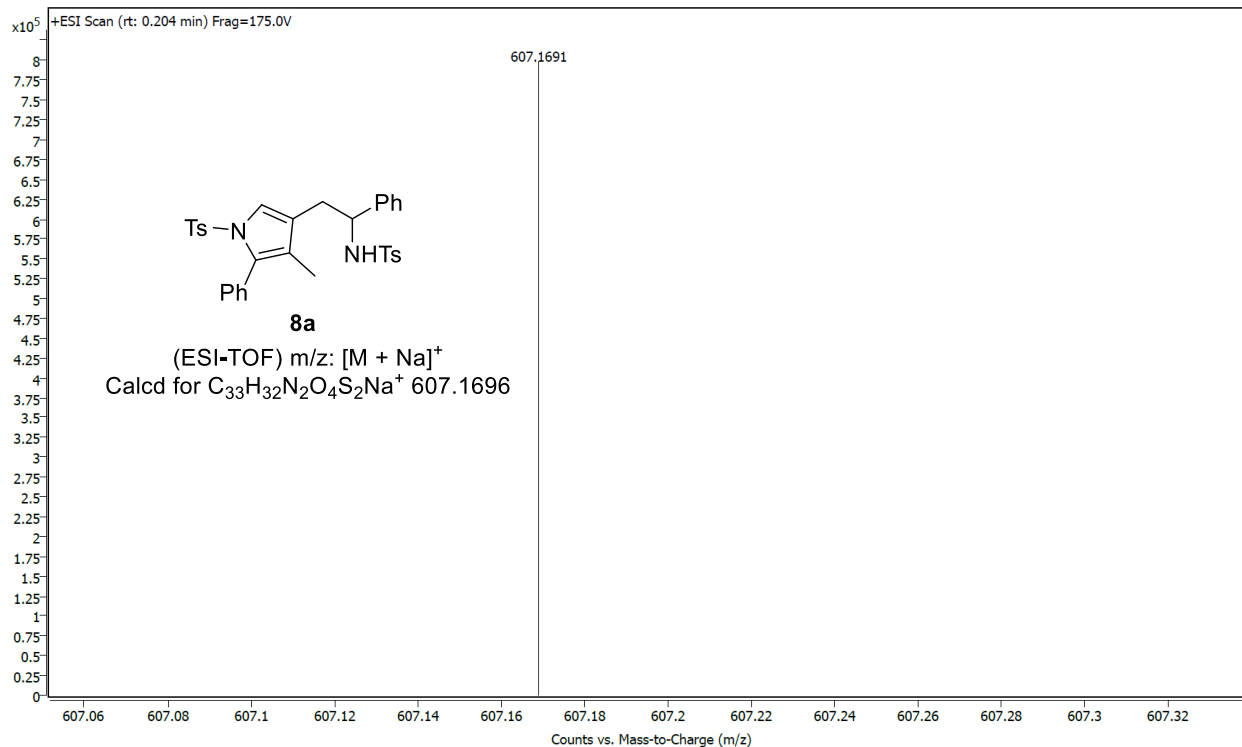

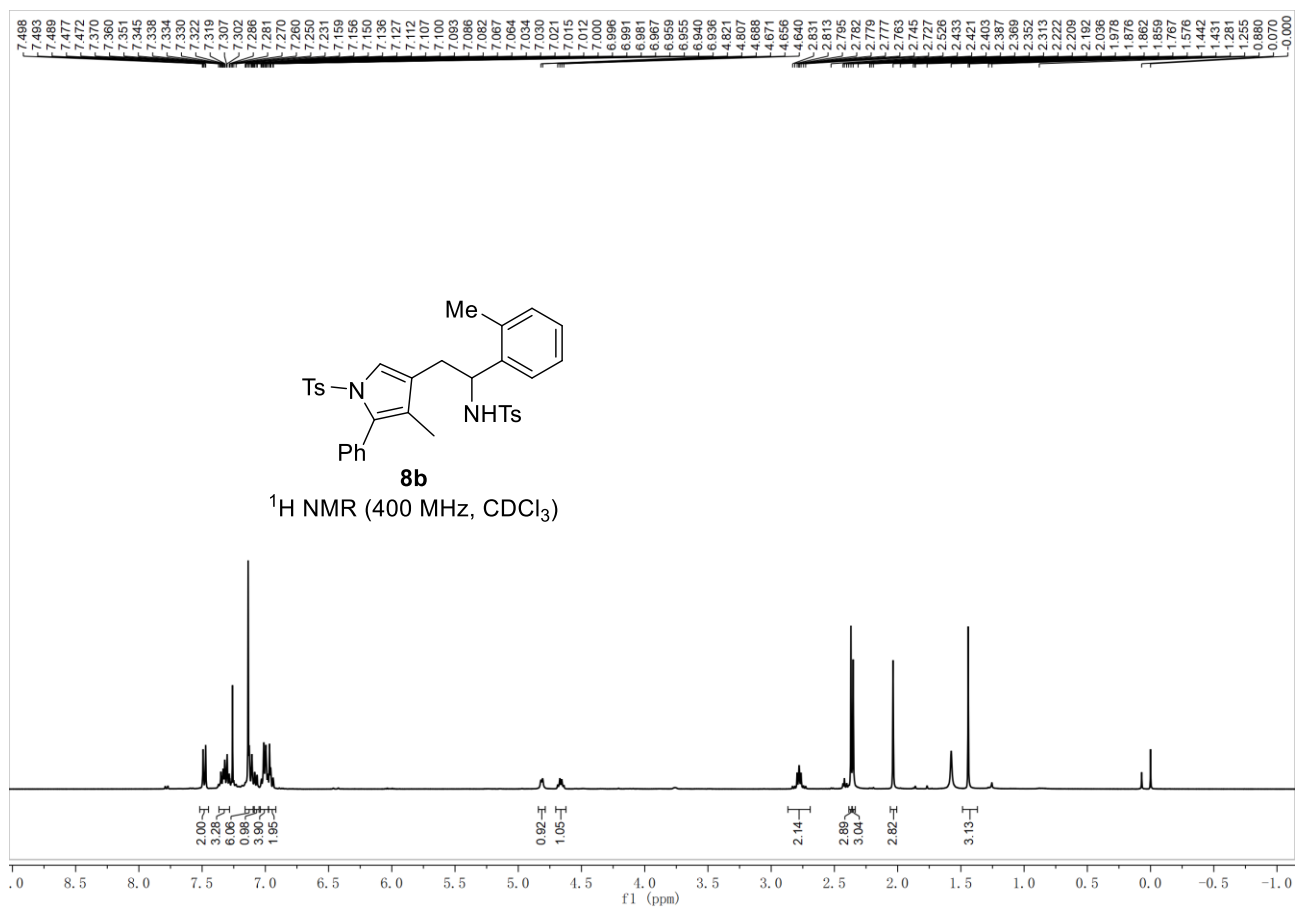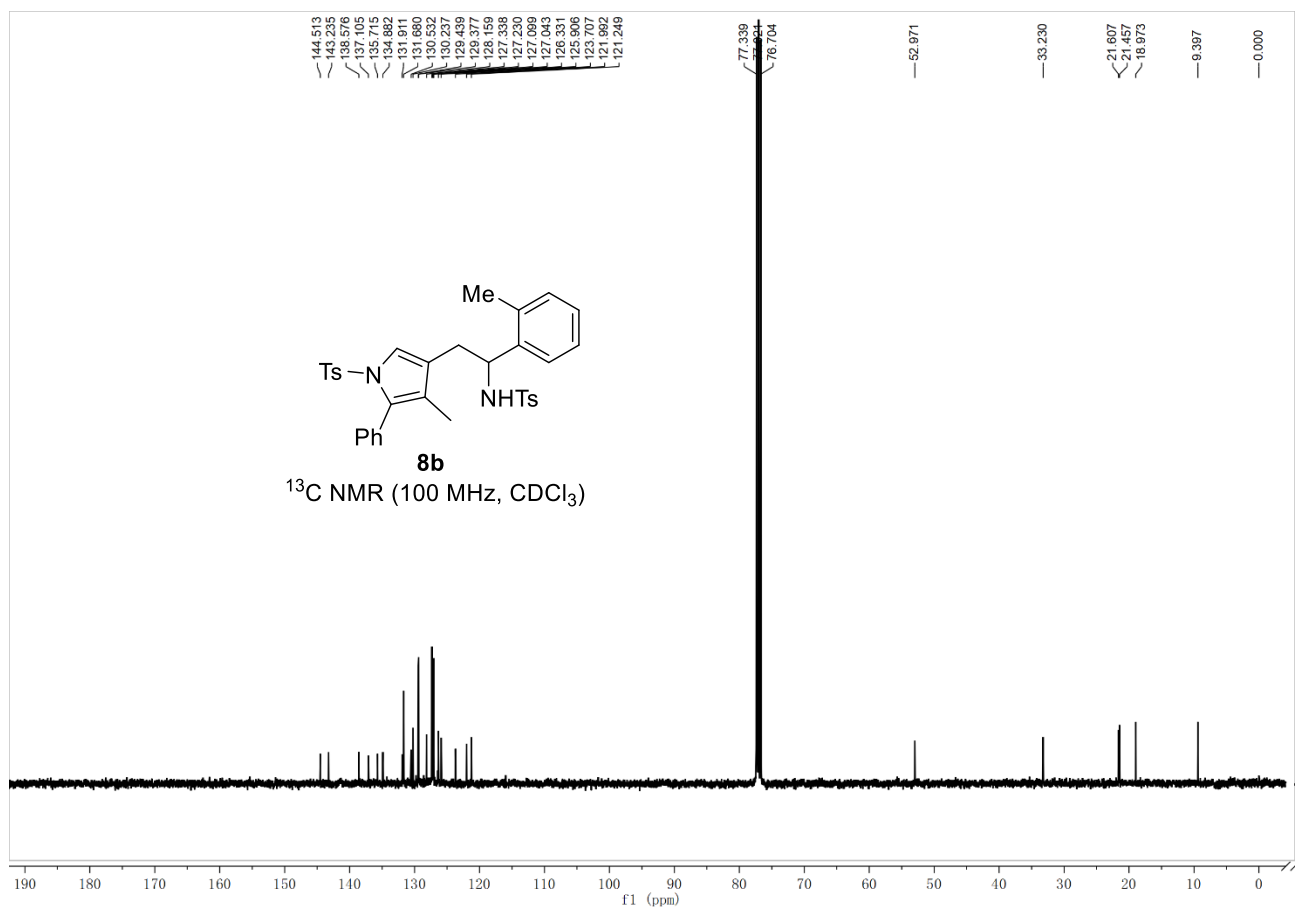

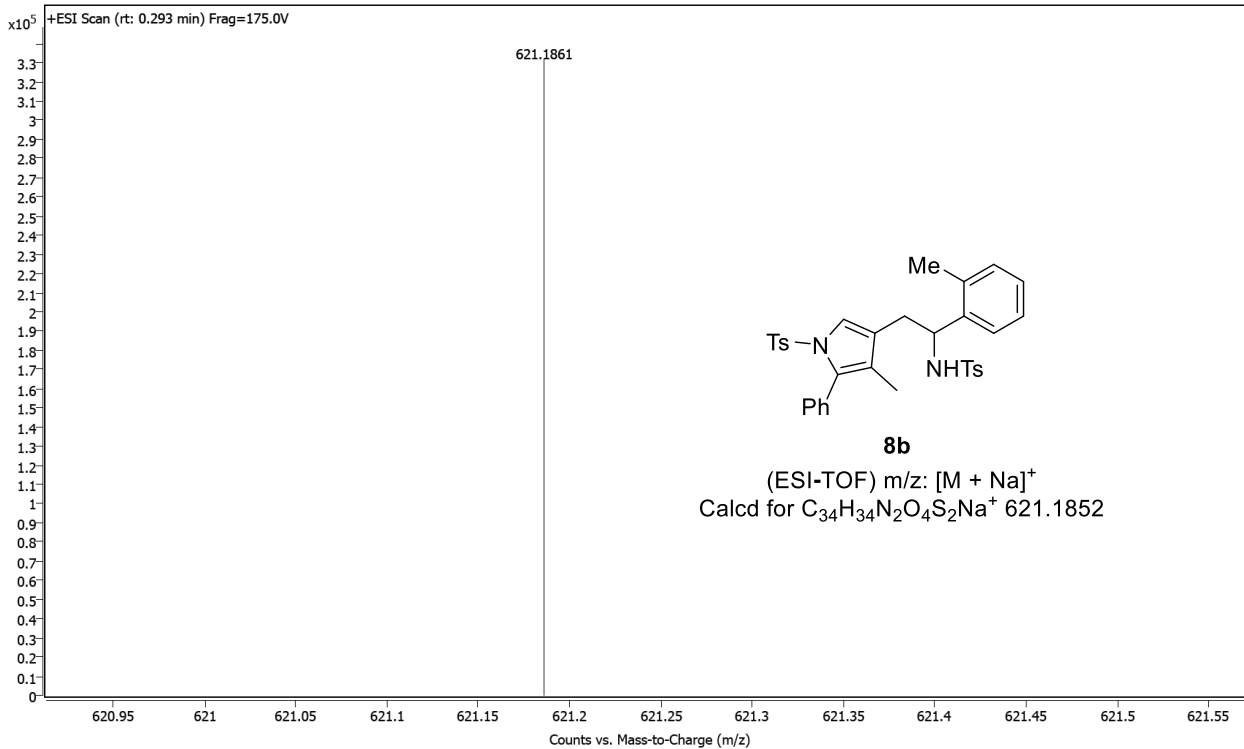

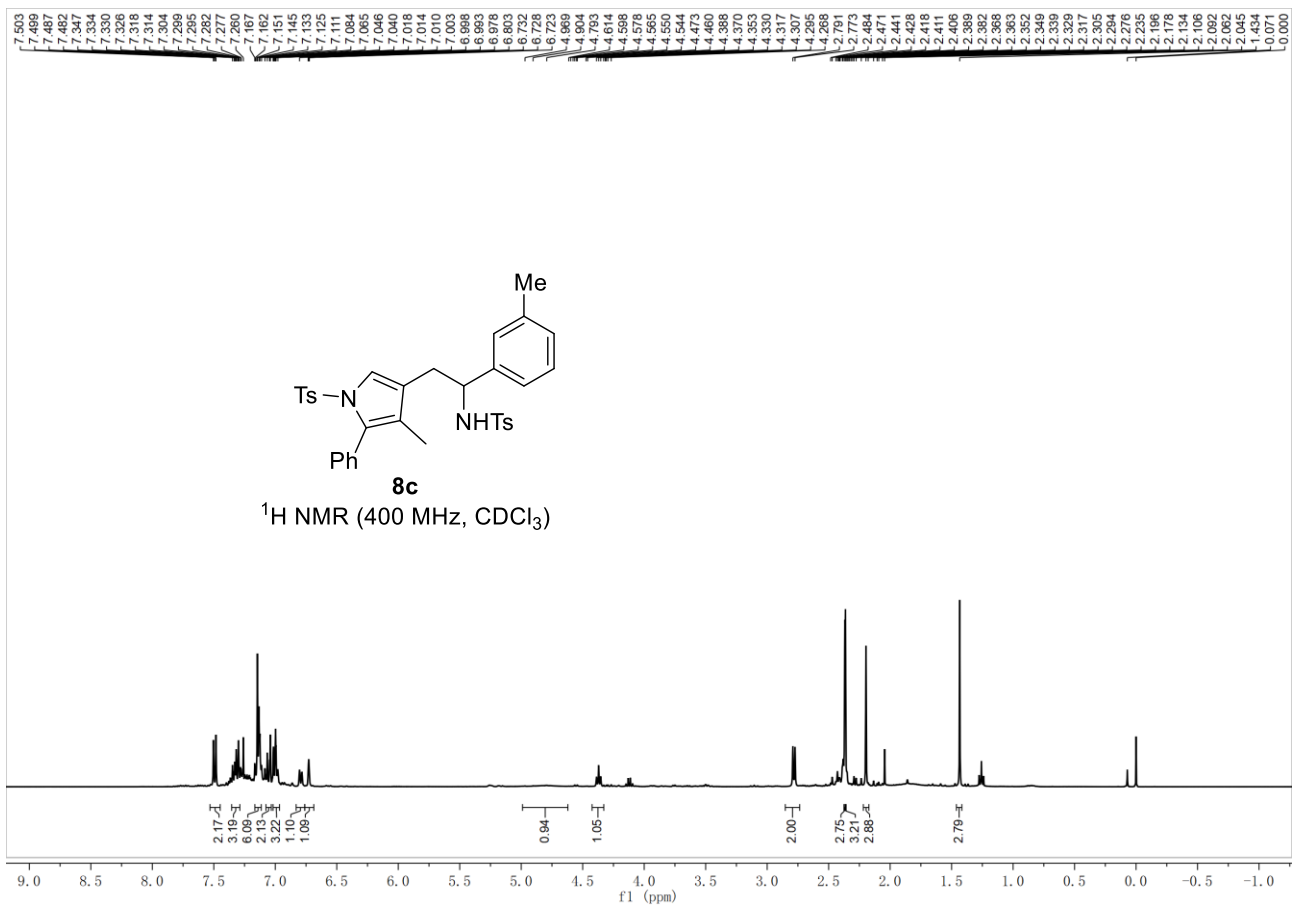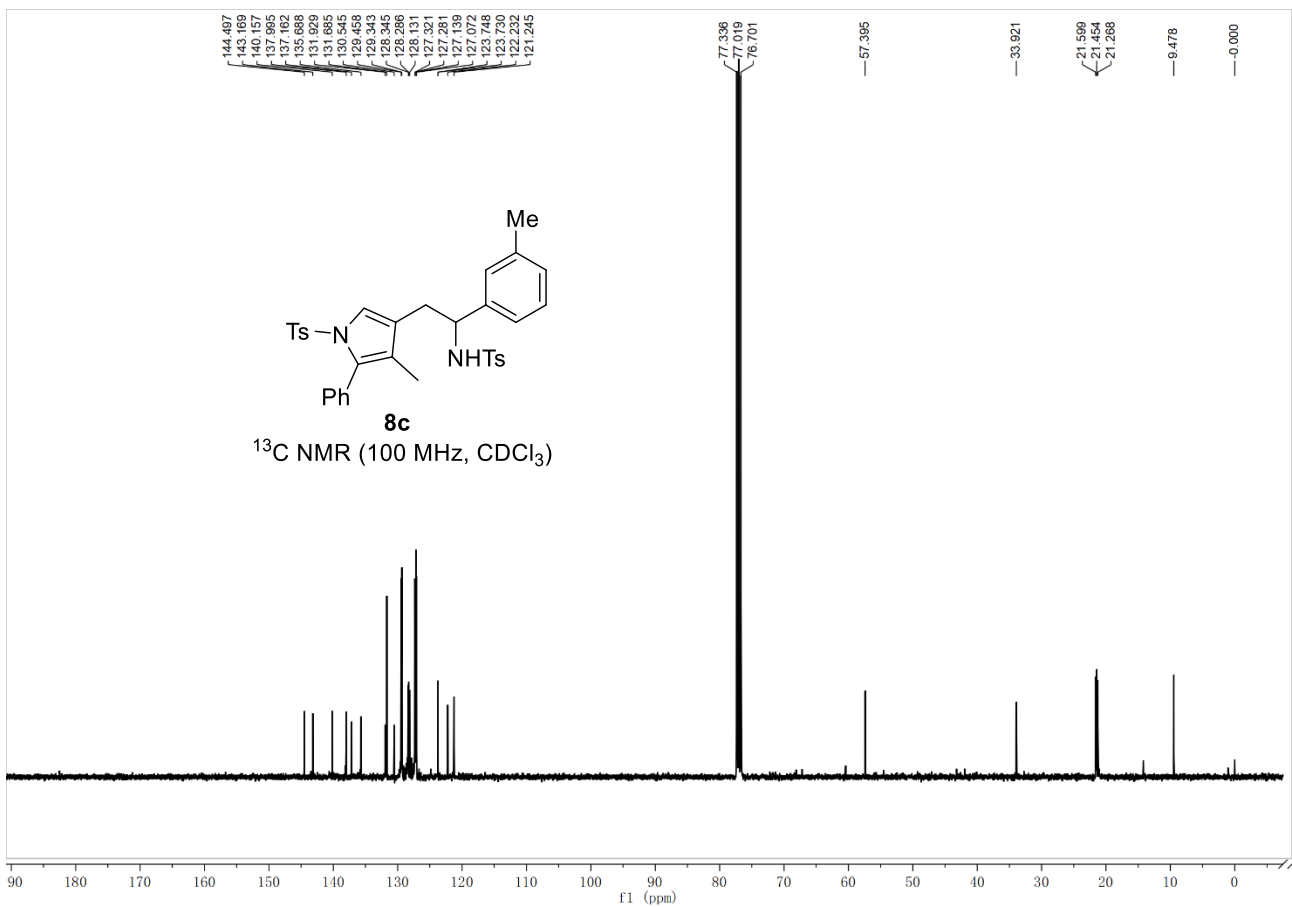

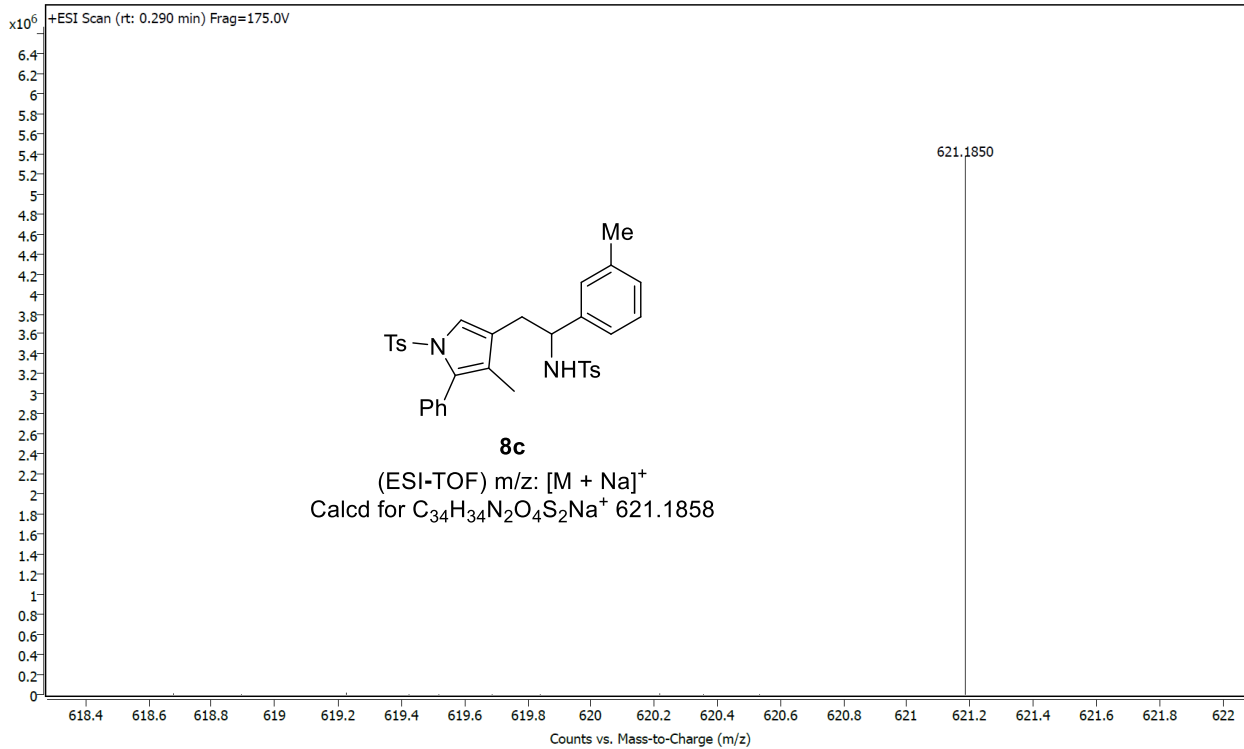



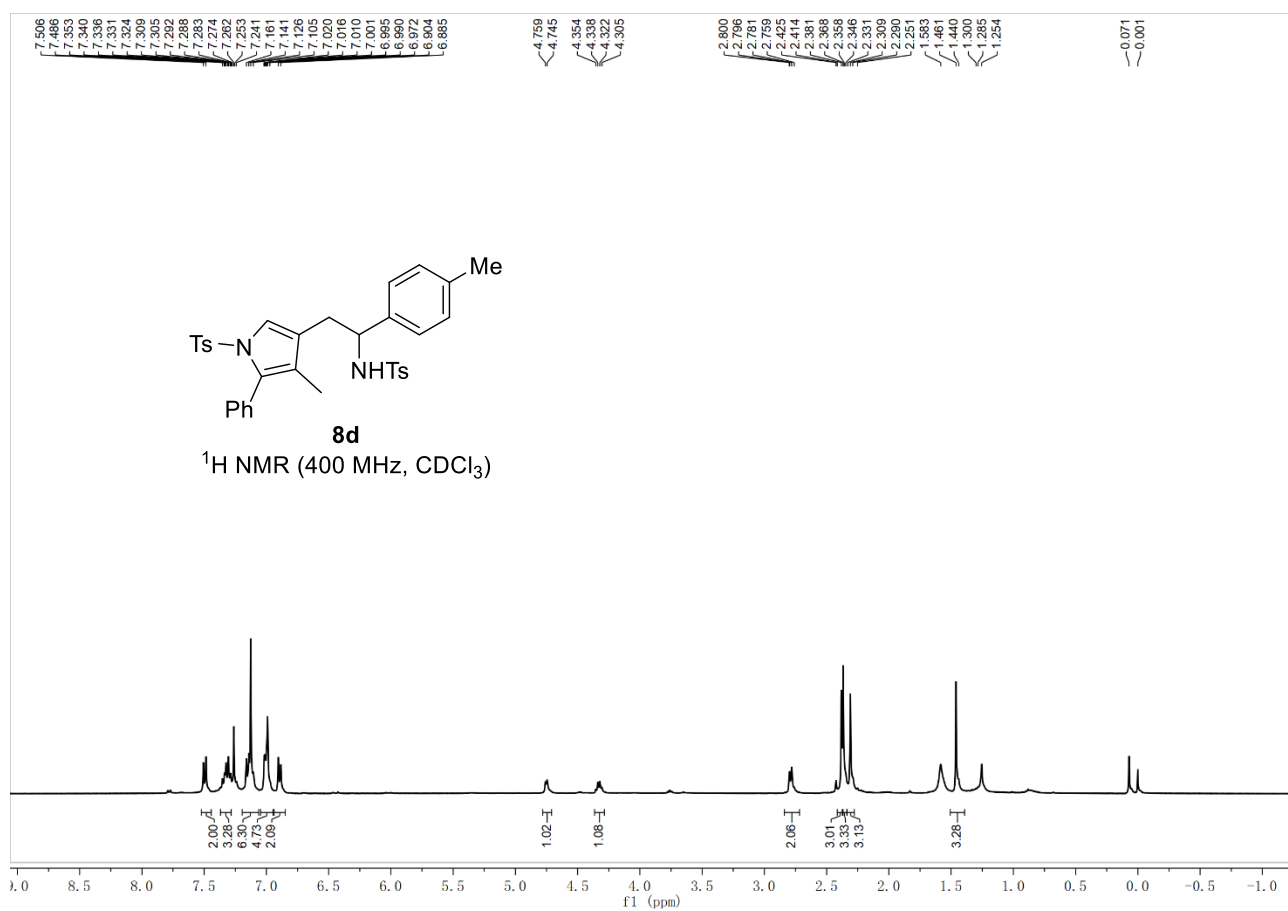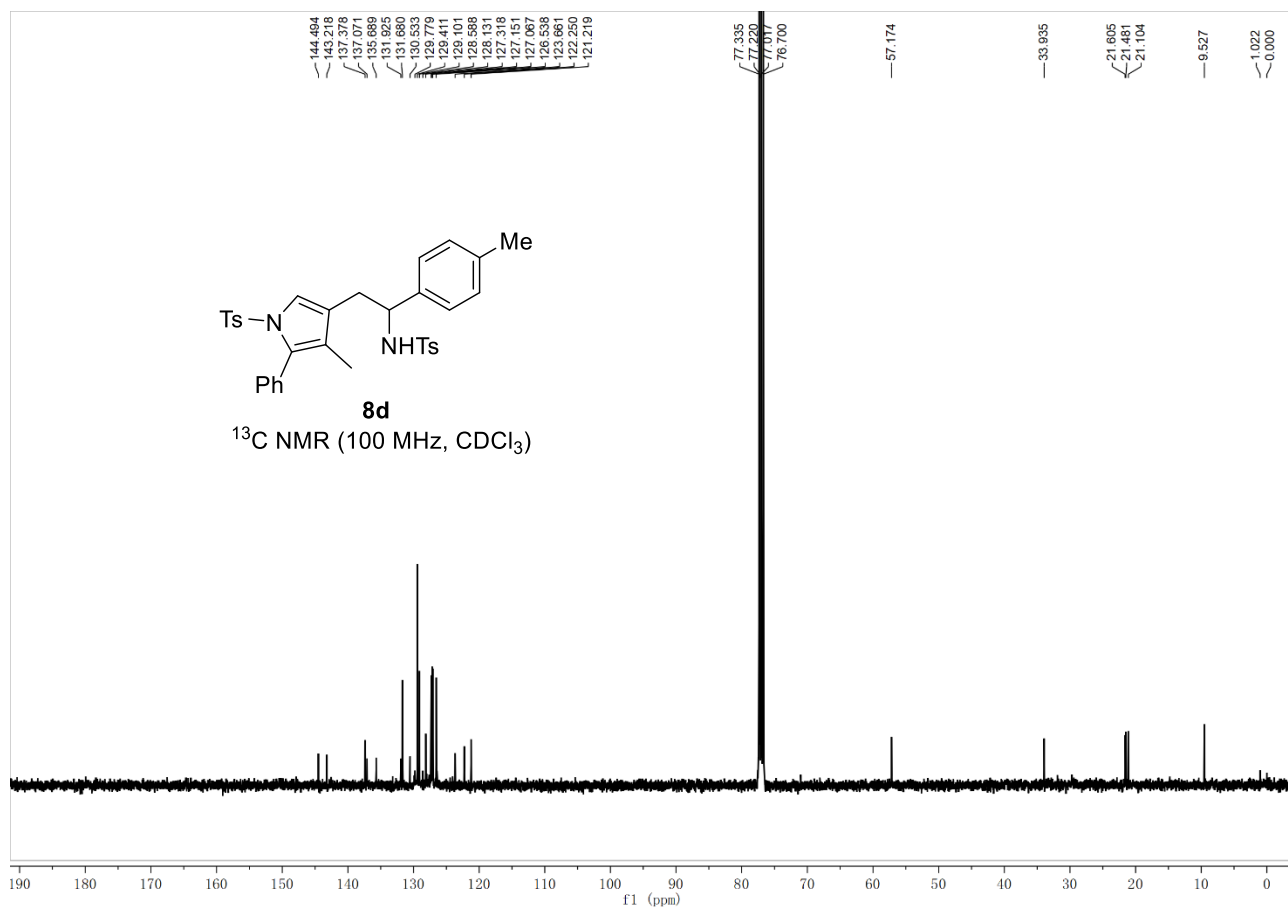

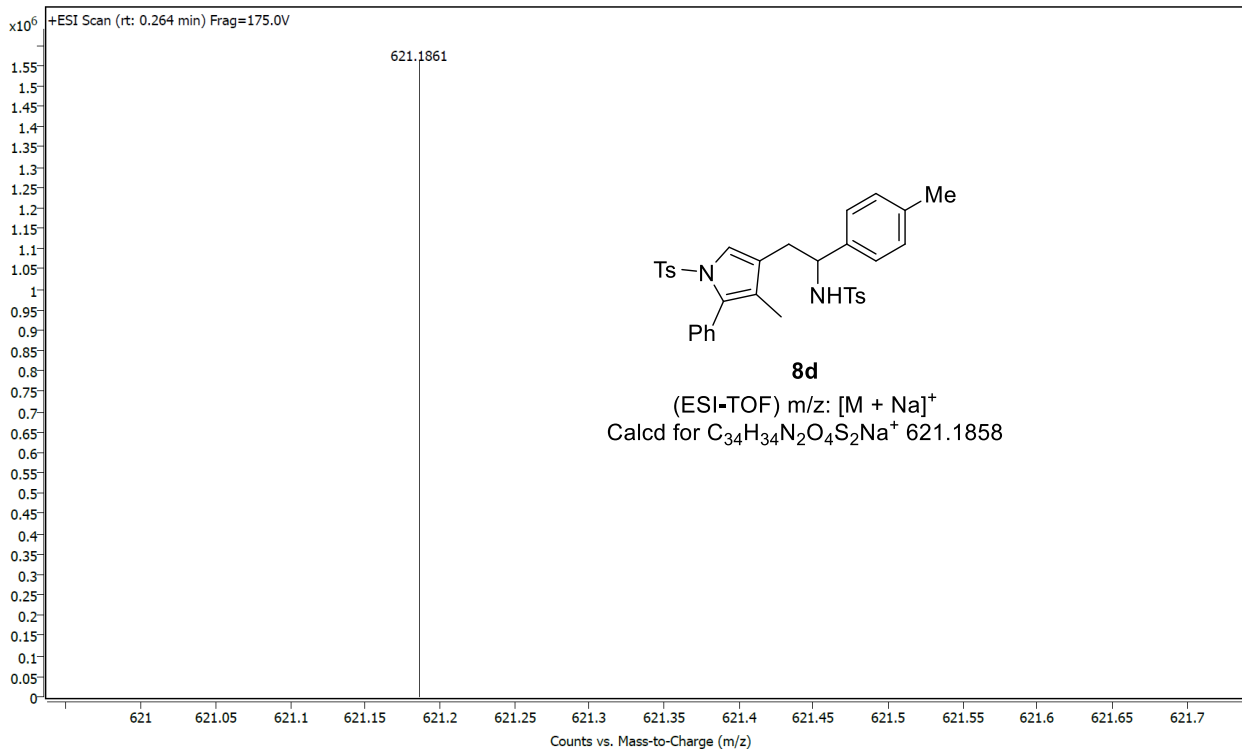

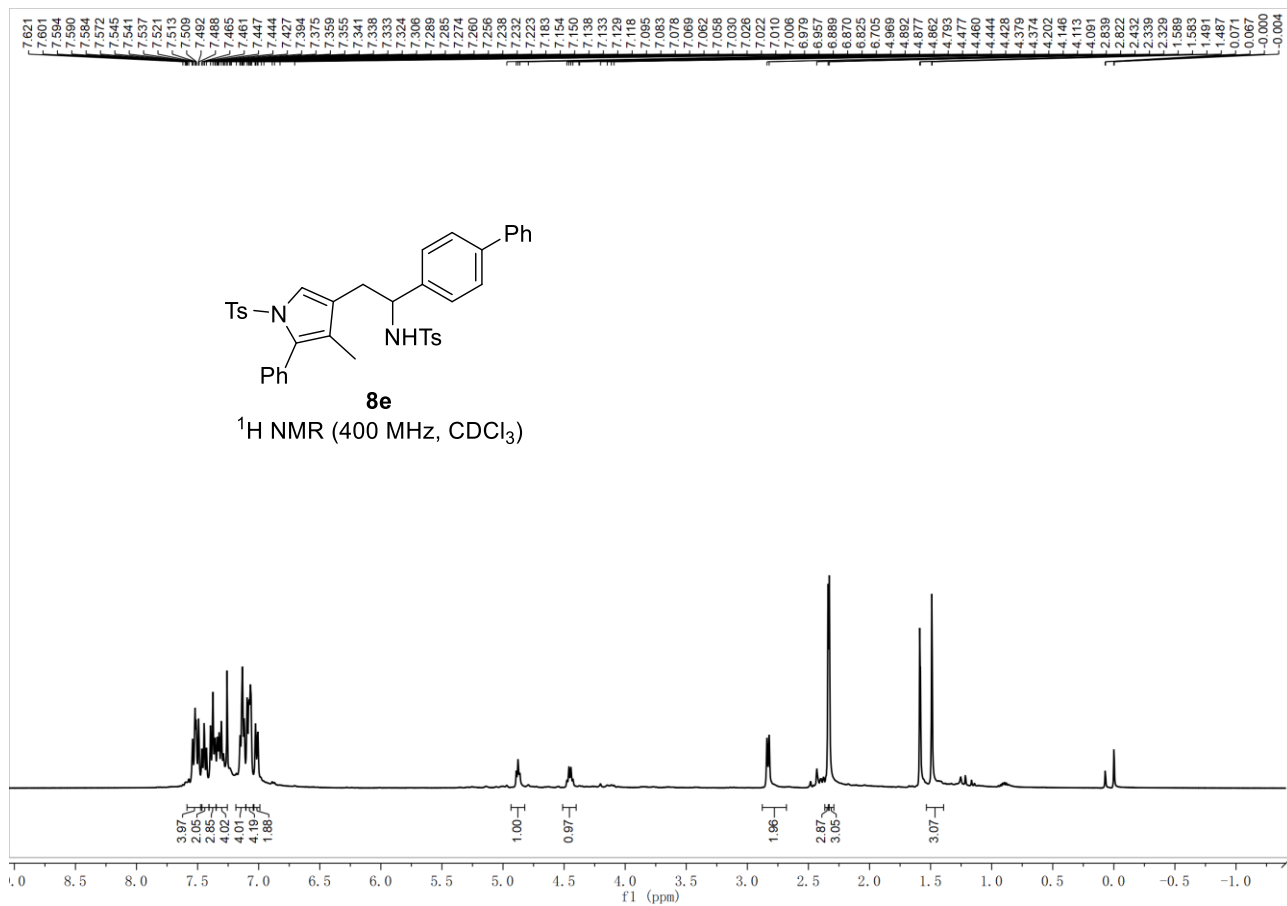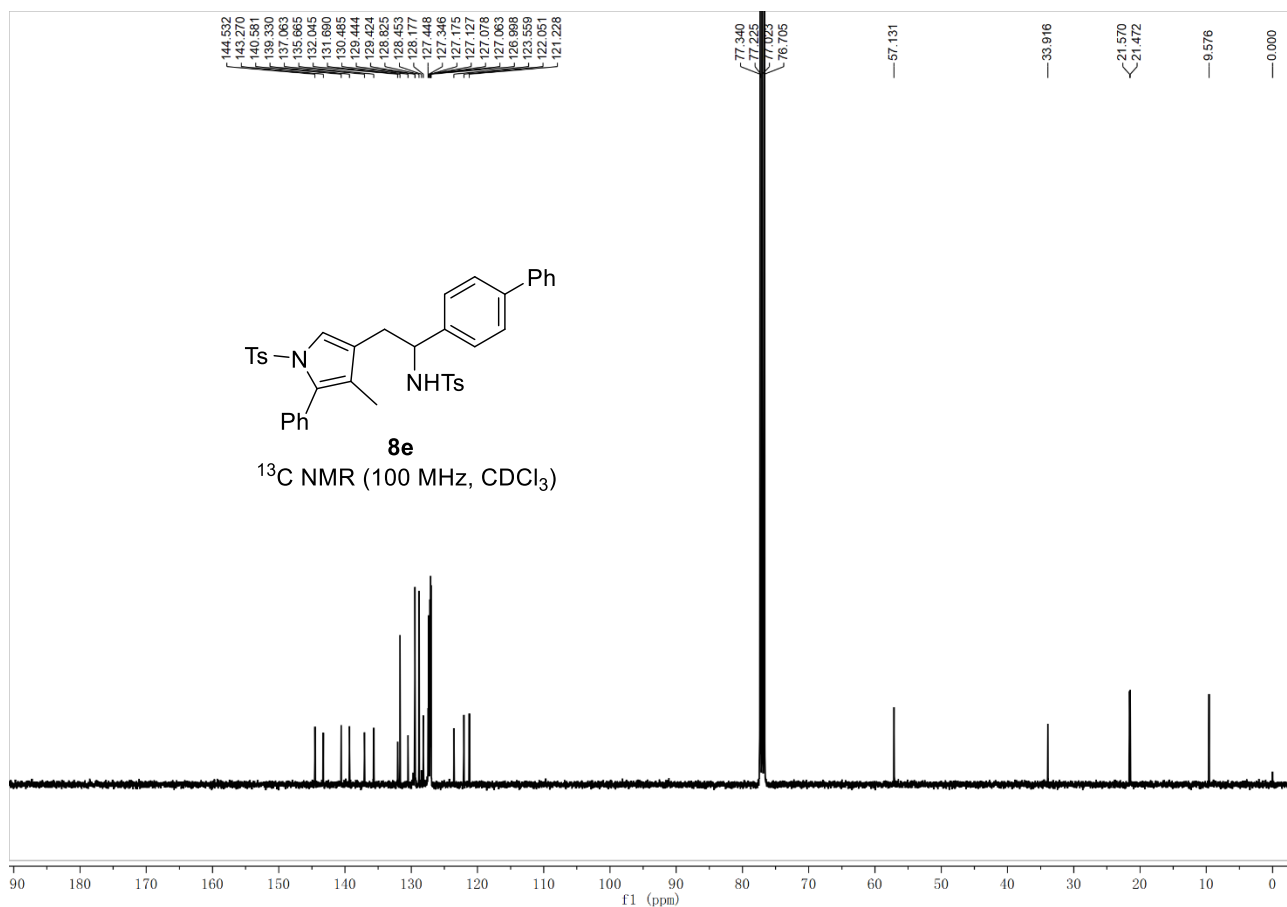

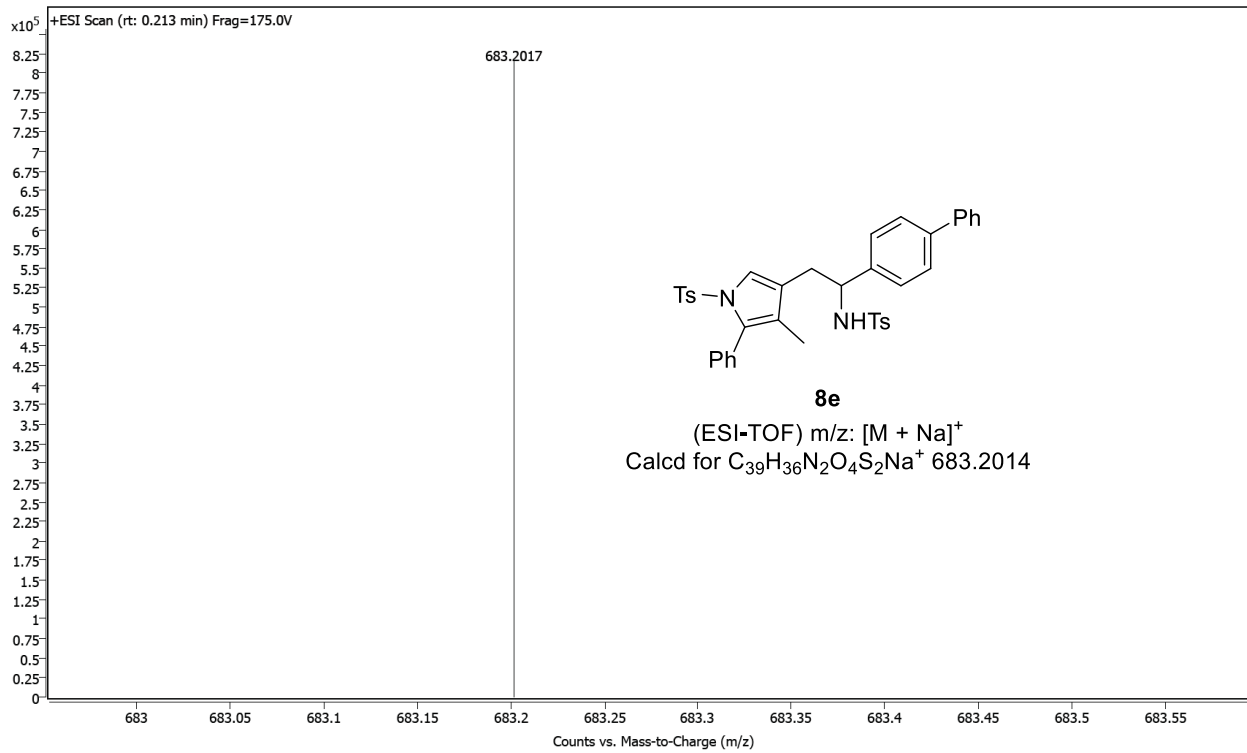

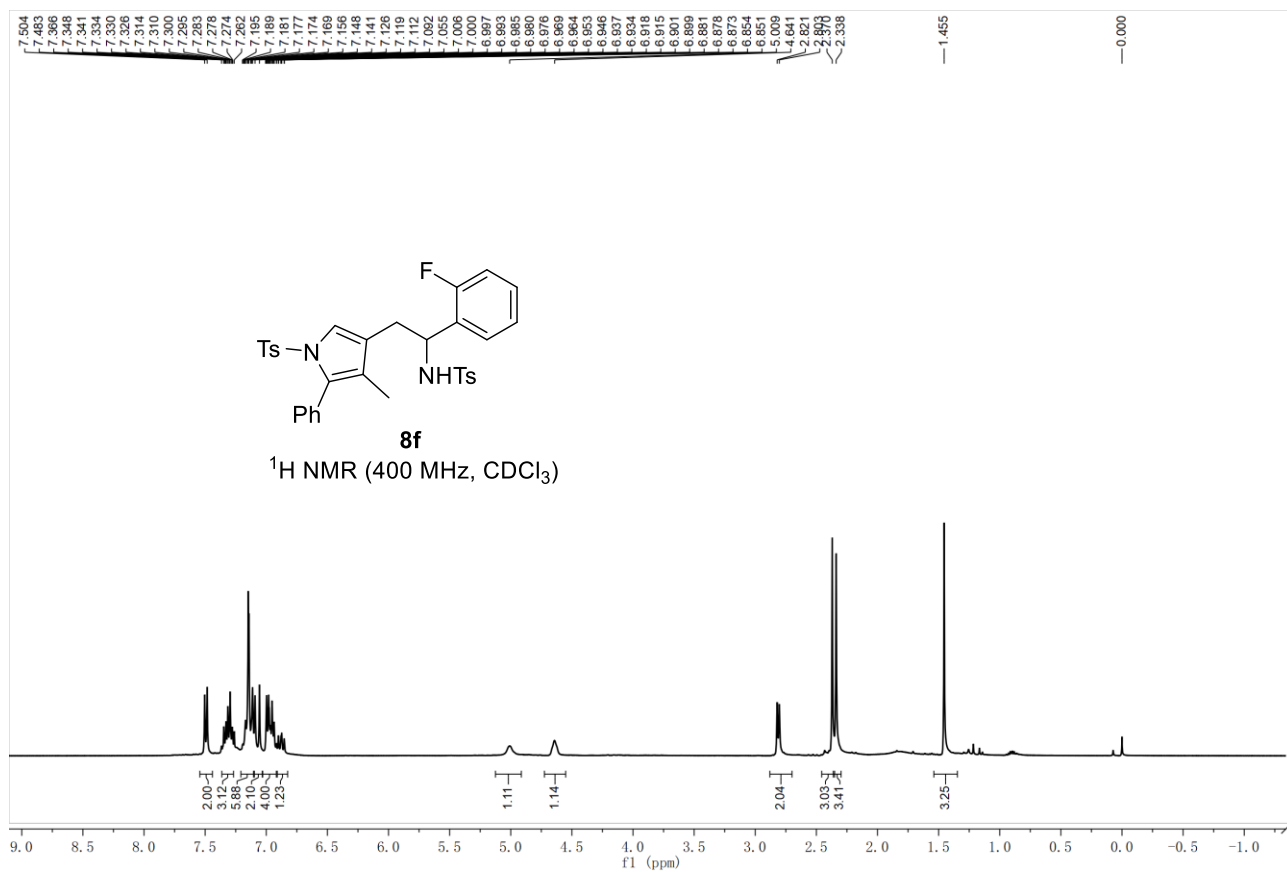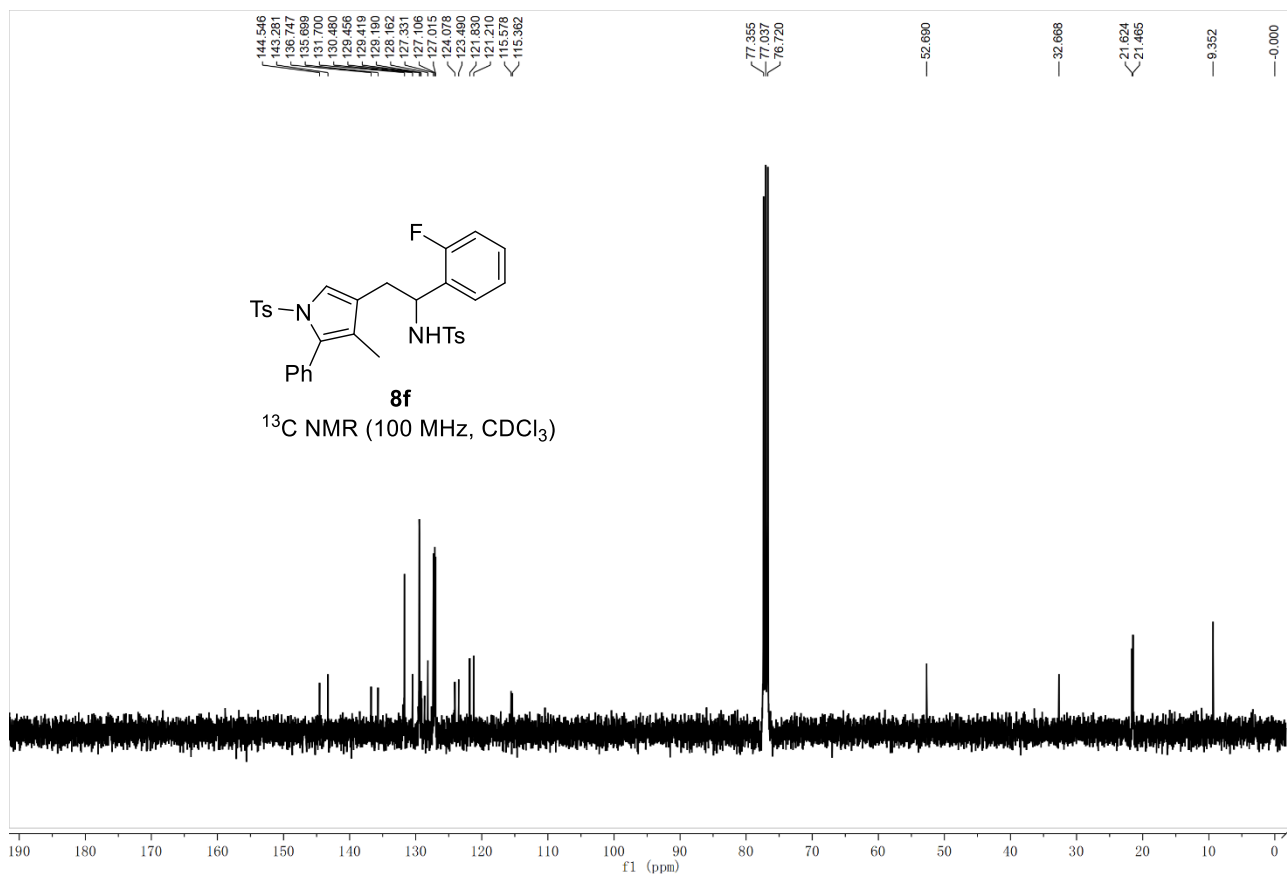

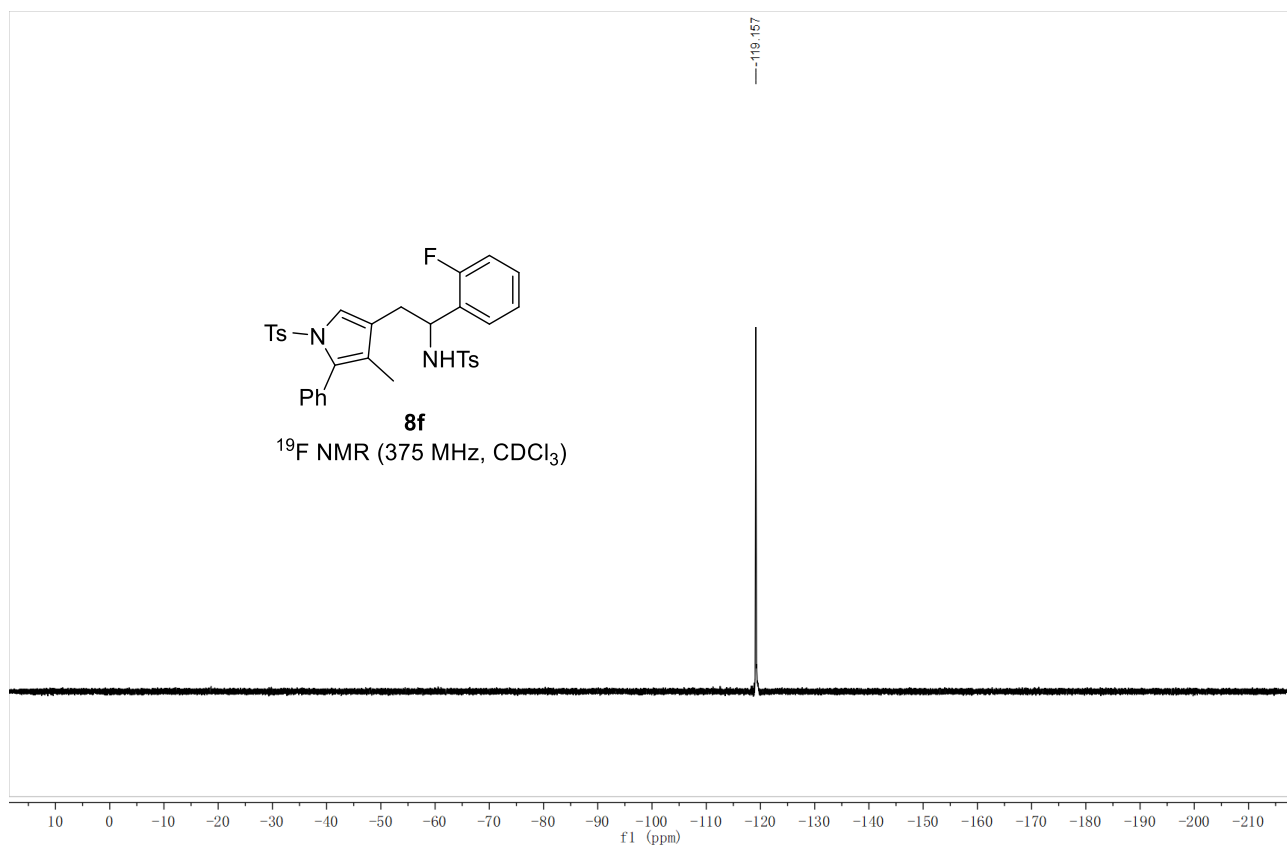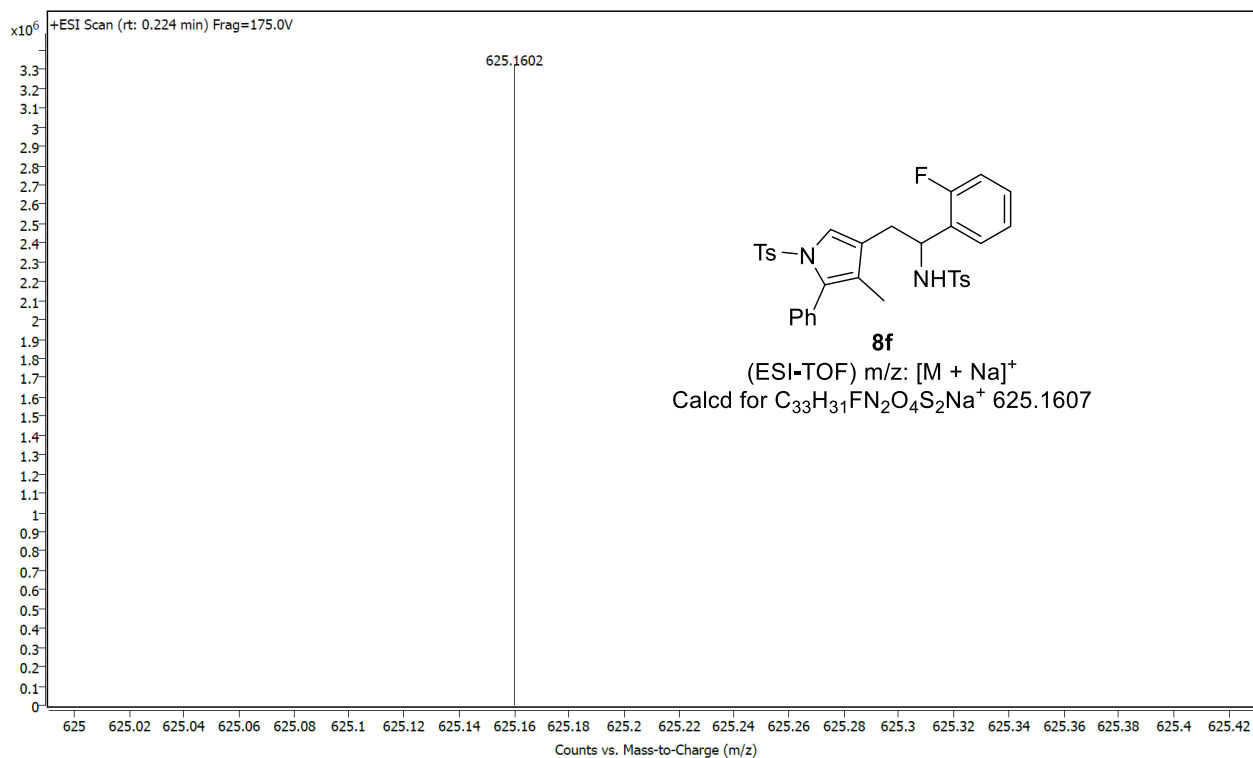

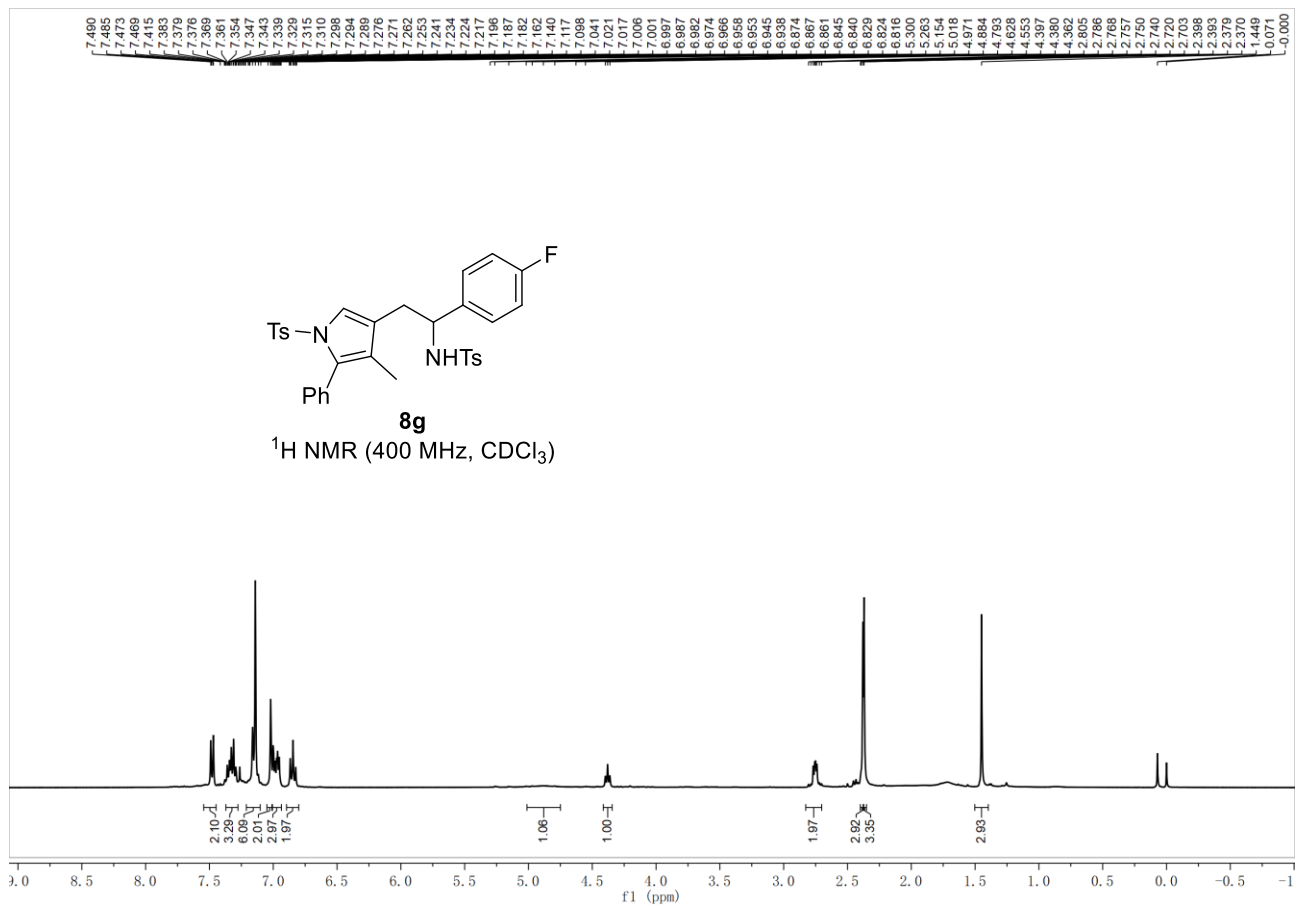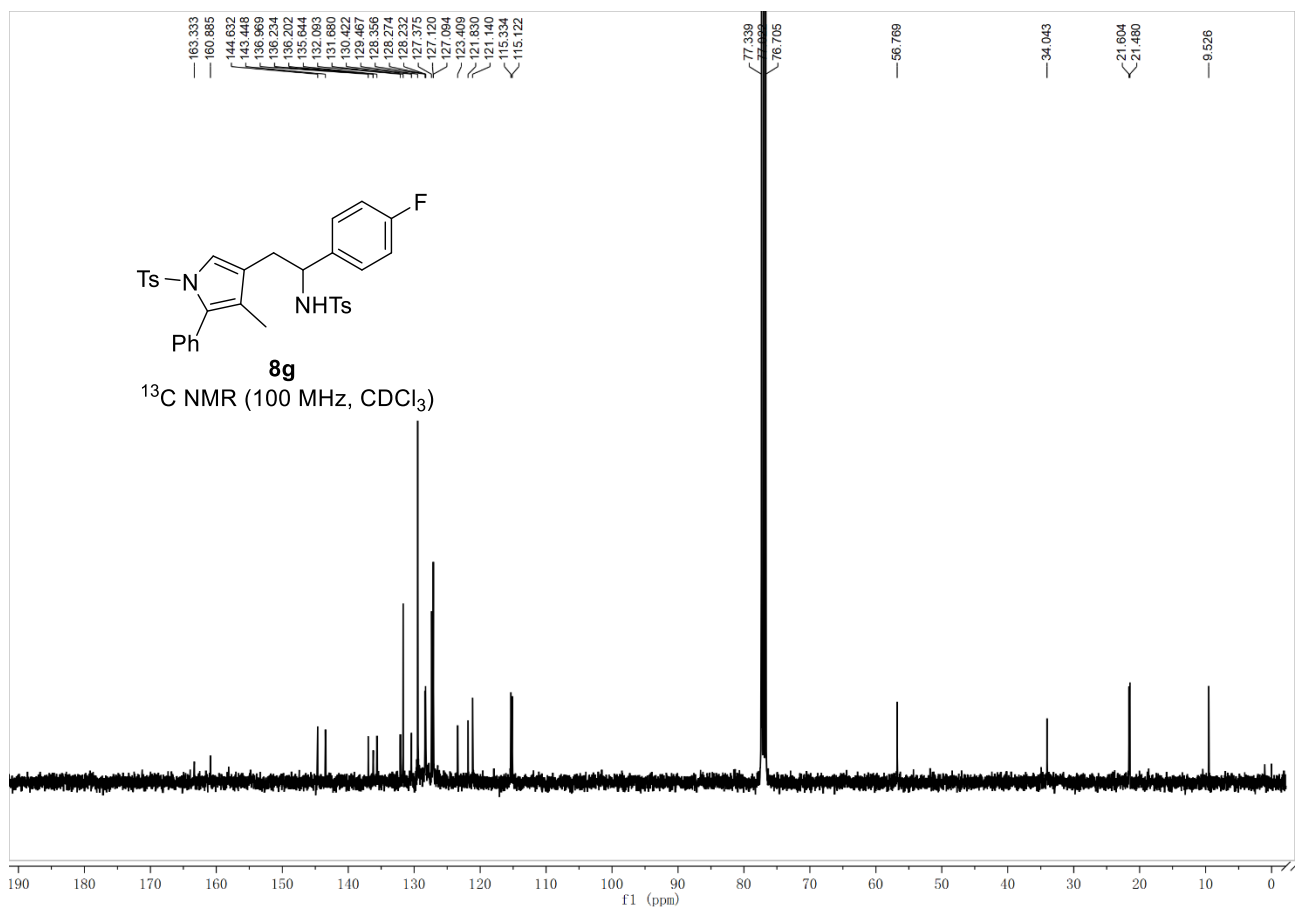

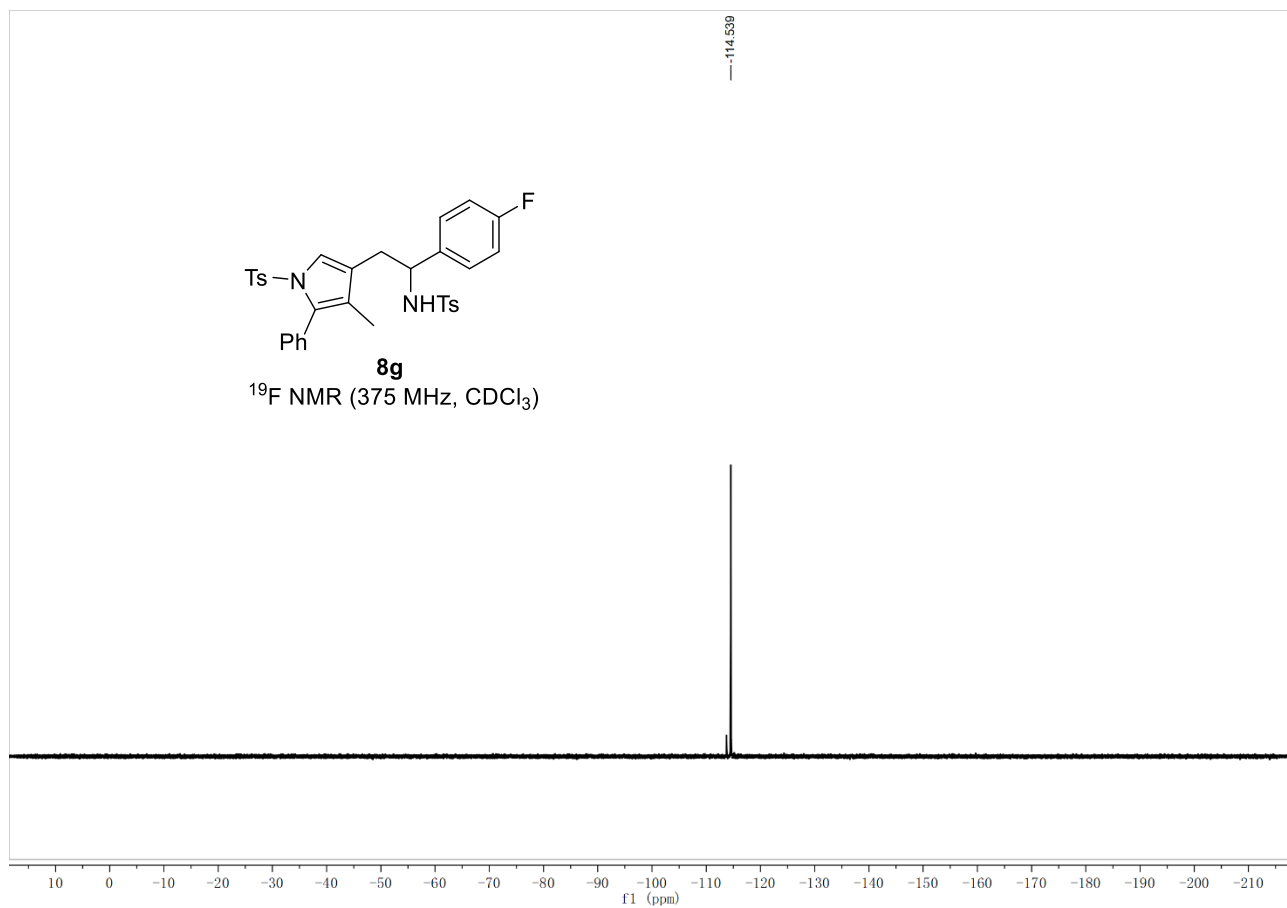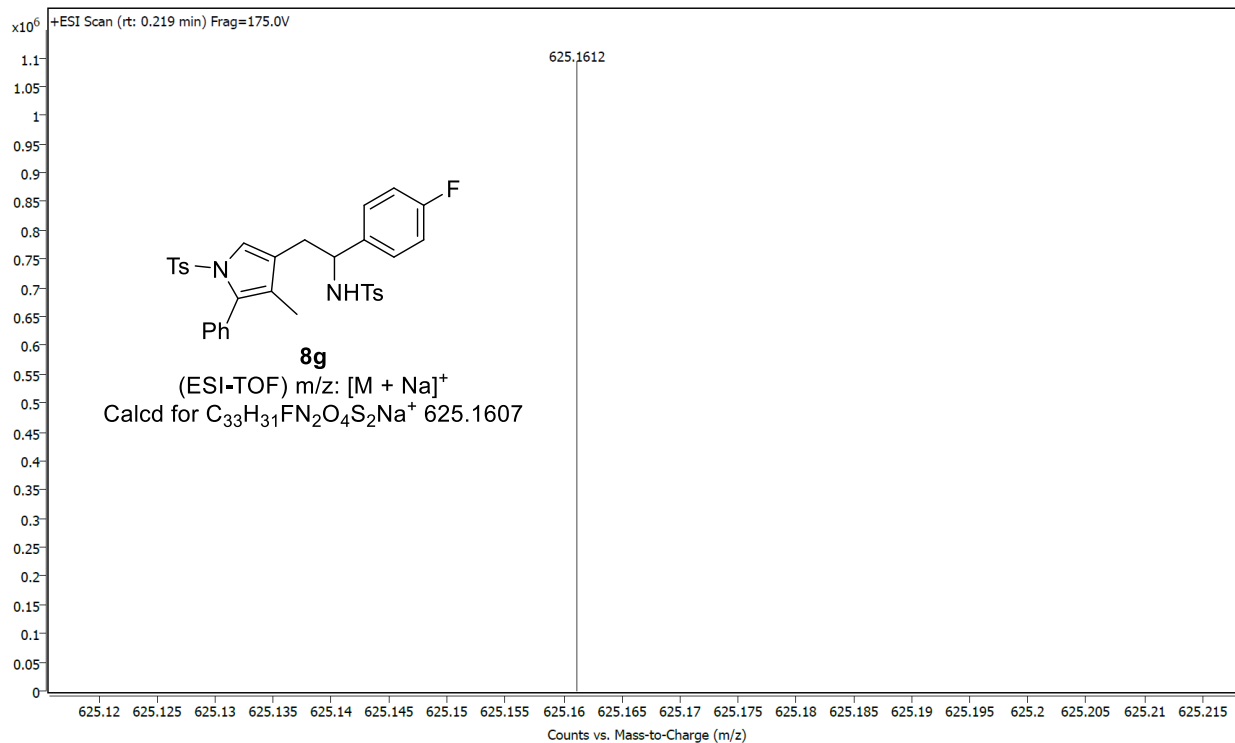



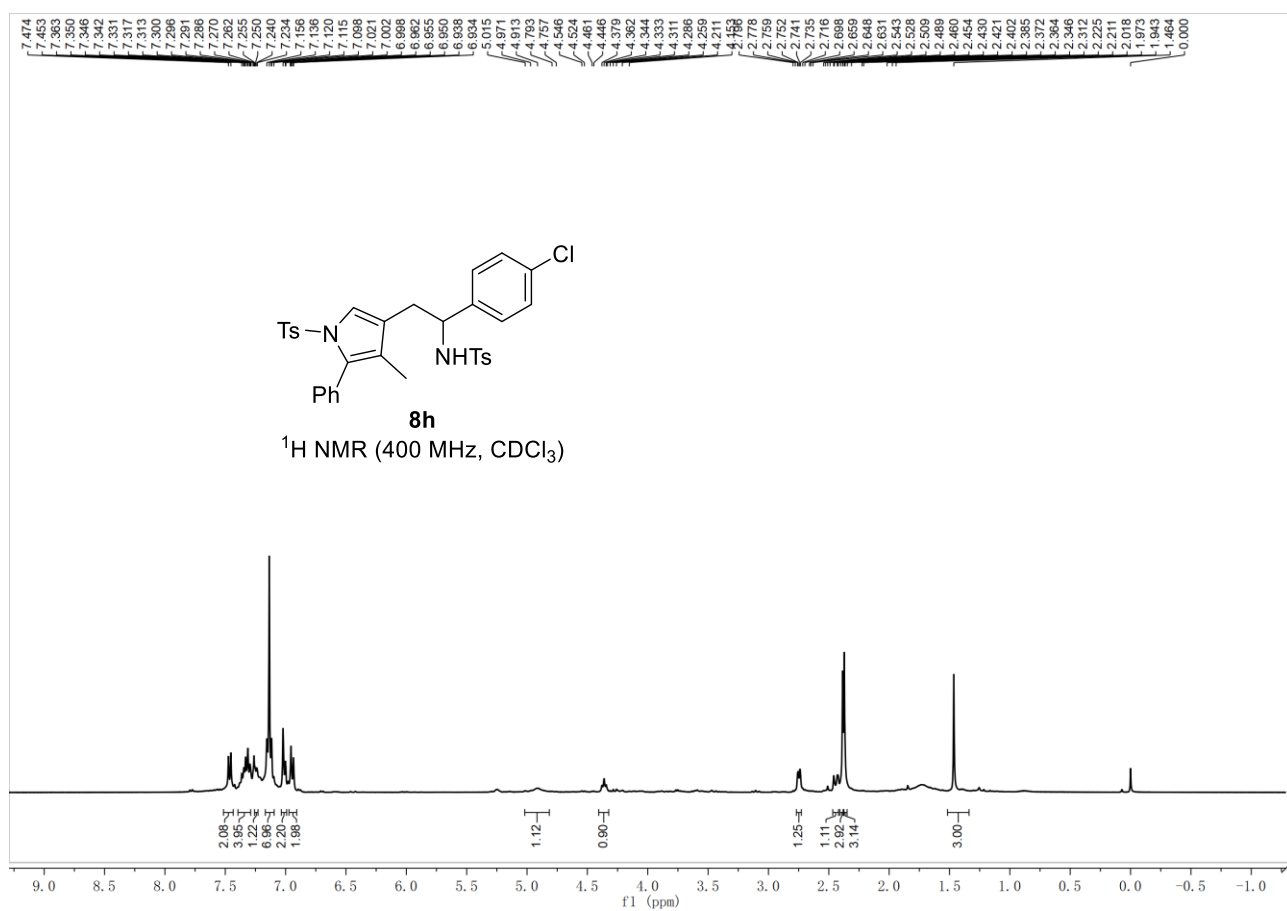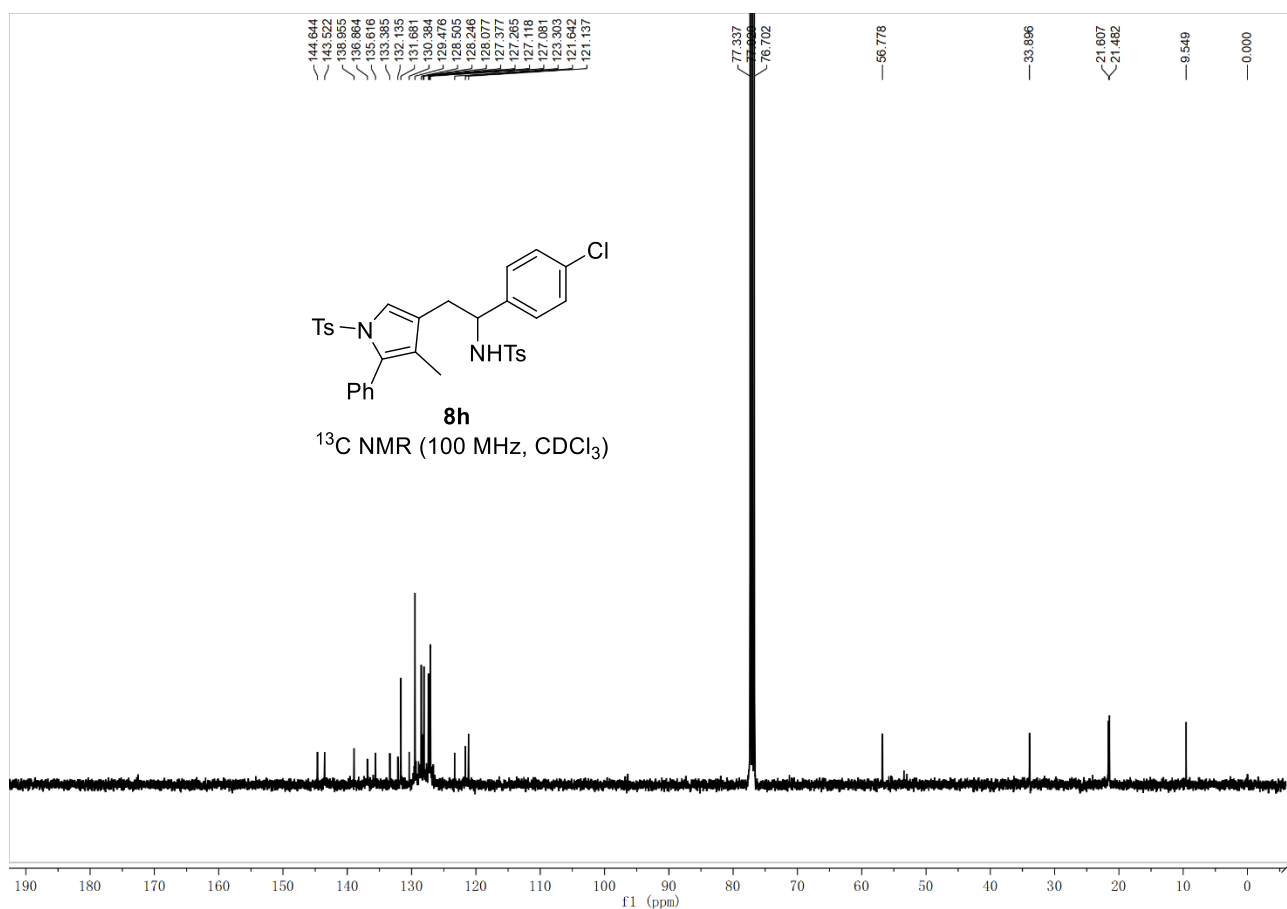

+ESI Scan (rt: 0.237 min) Frag=175.0V

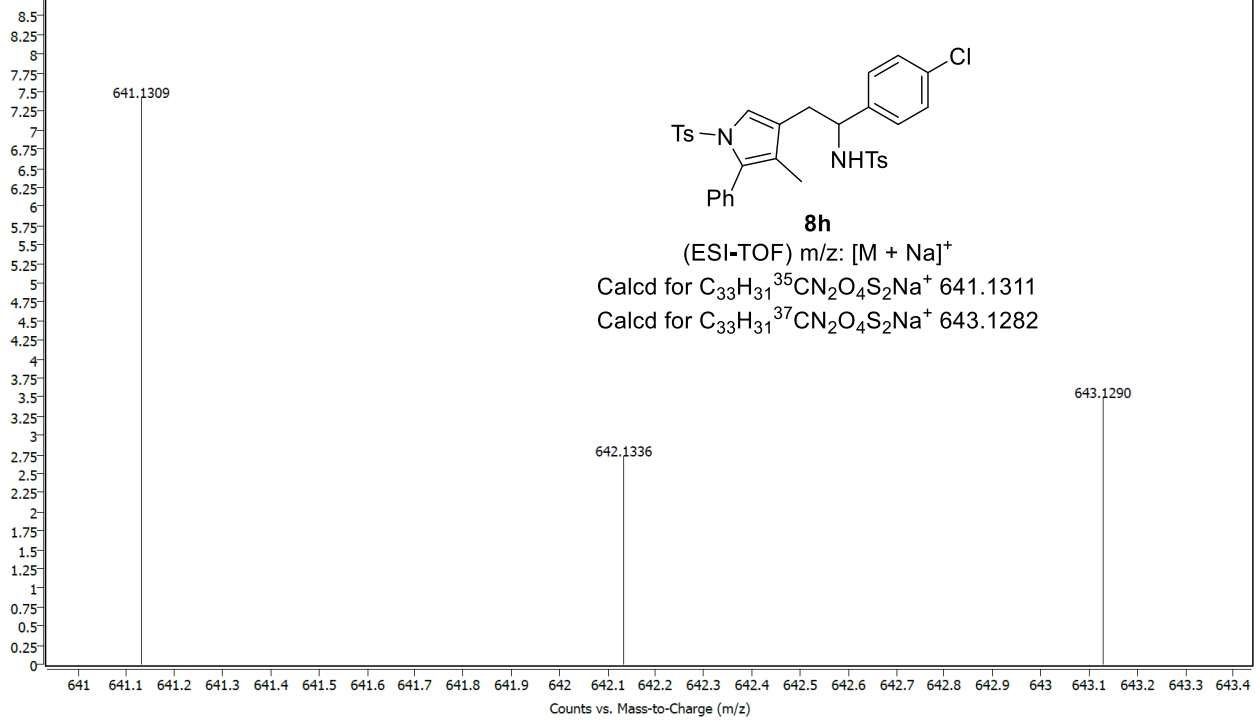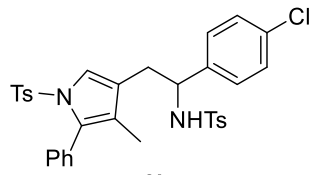

**8h**

(ESI-TOF) m/z: [M + Na]<sup>+</sup>

Calcd for C<sub>33</sub>H<sub>31</sub><sup>35</sup>CN<sub>2</sub>O<sub>4</sub>S<sub>2</sub>Na<sup>+</sup> 641.1311

Calcd for C<sub>33</sub>H<sub>31</sub><sup>37</sup>CN<sub>2</sub>O<sub>4</sub>S<sub>2</sub>Na<sup>+</sup> 643.1282

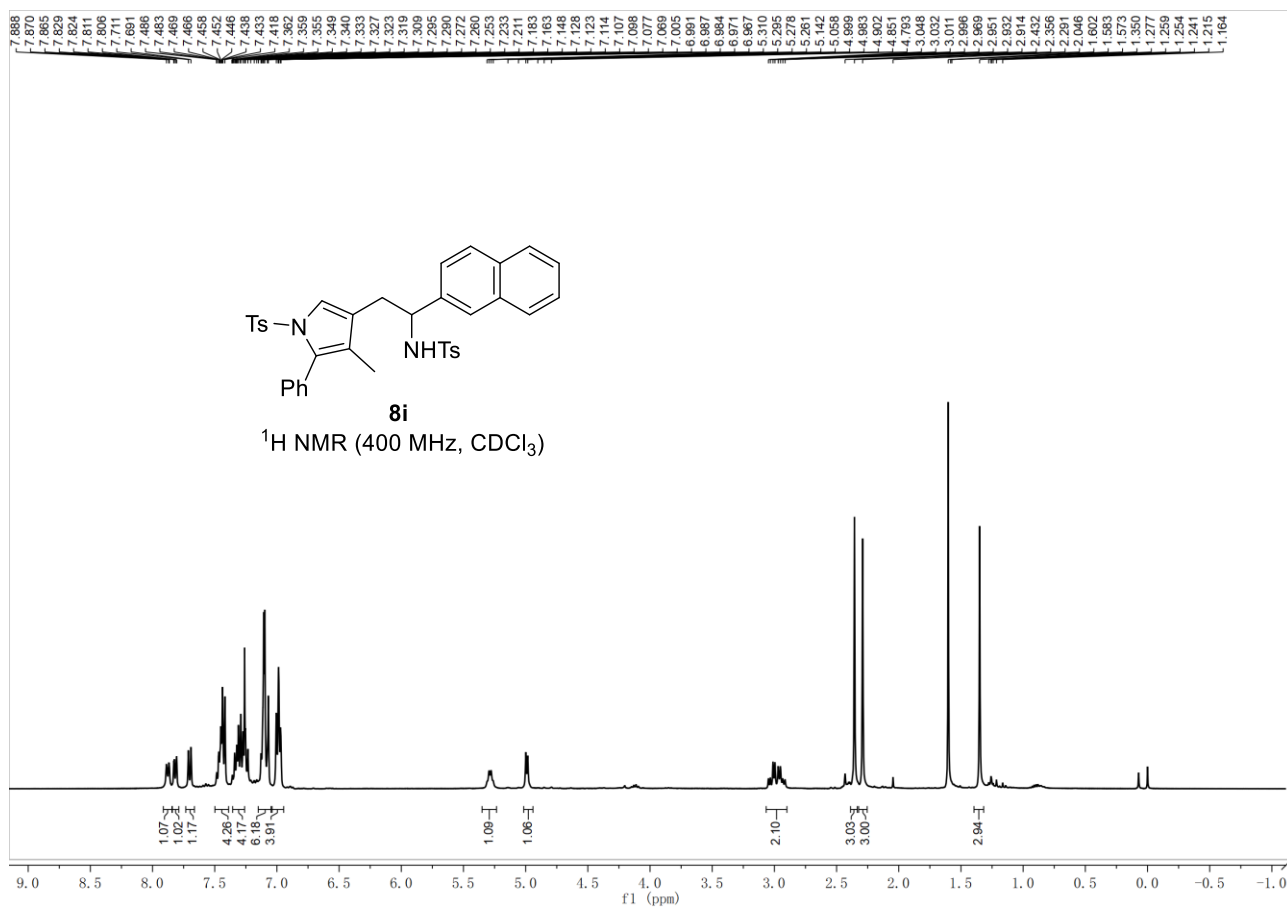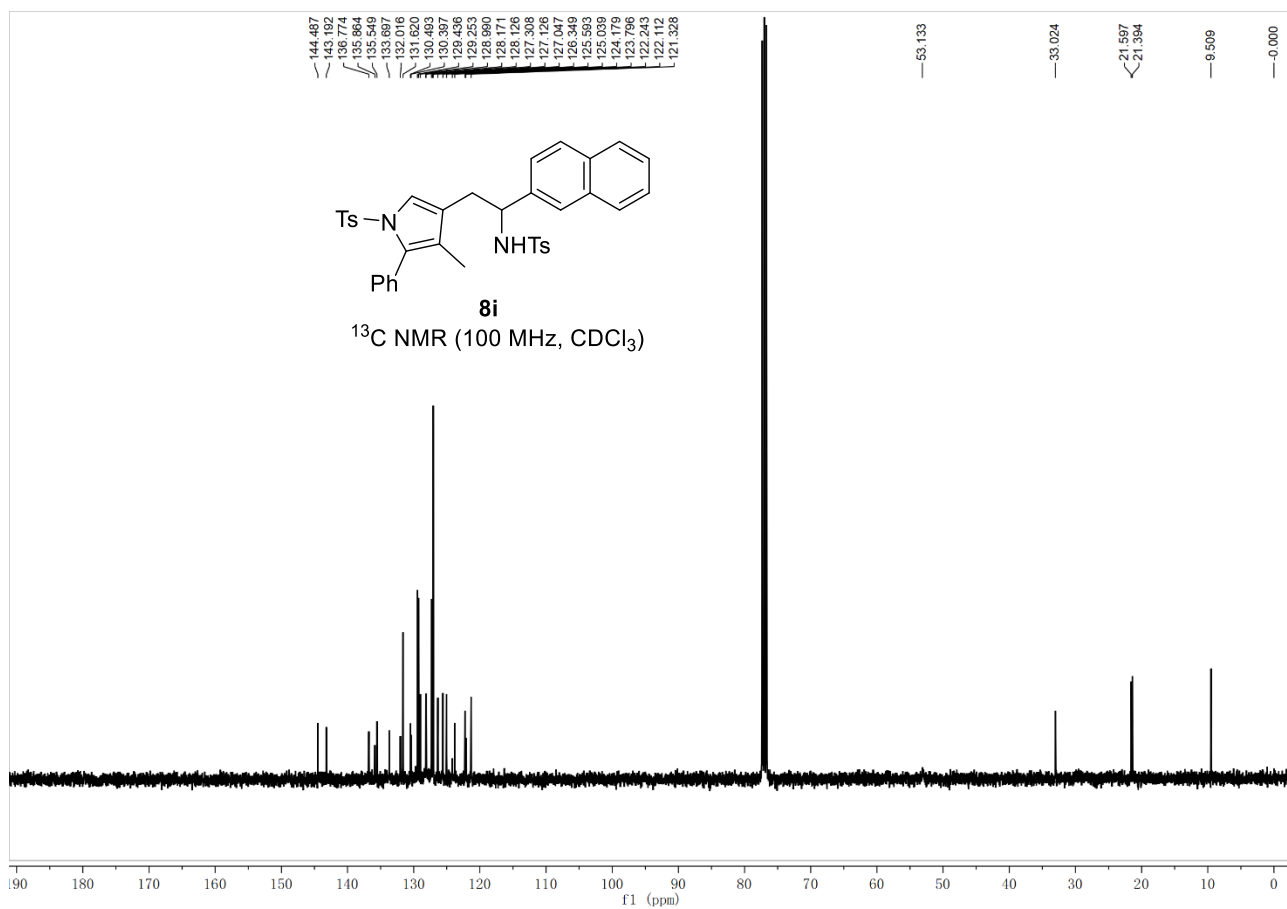

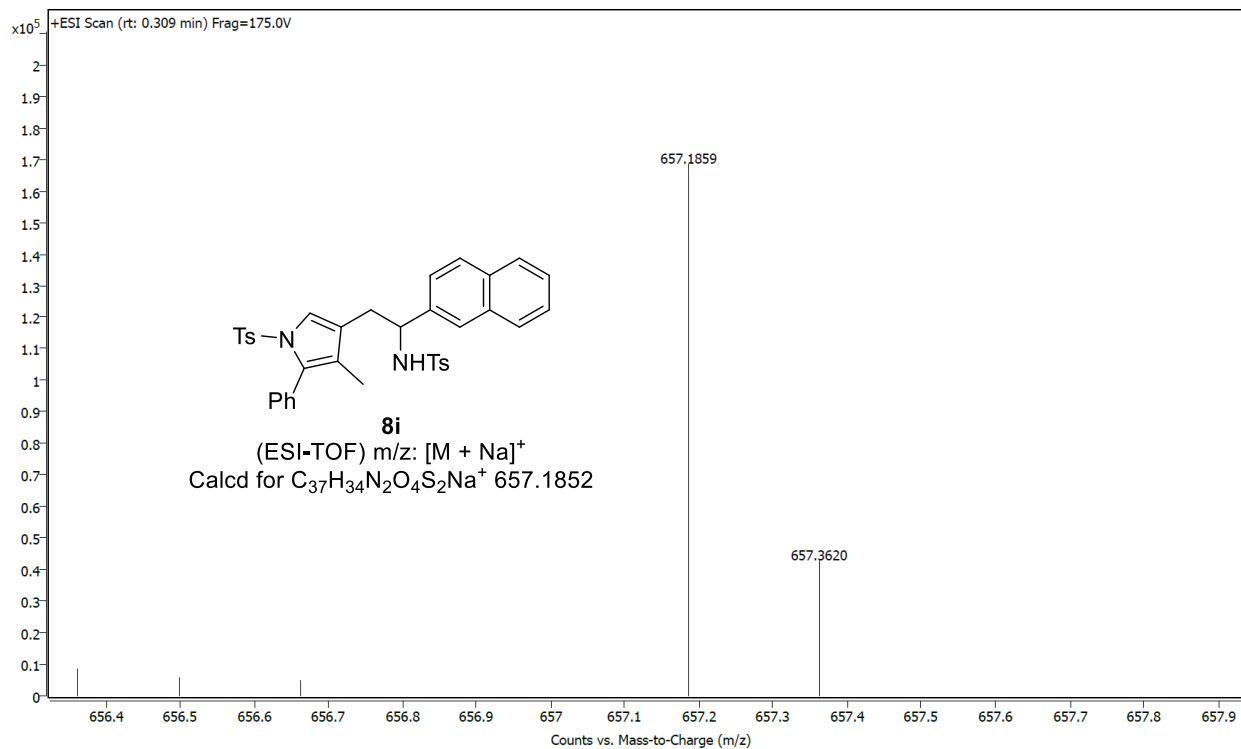

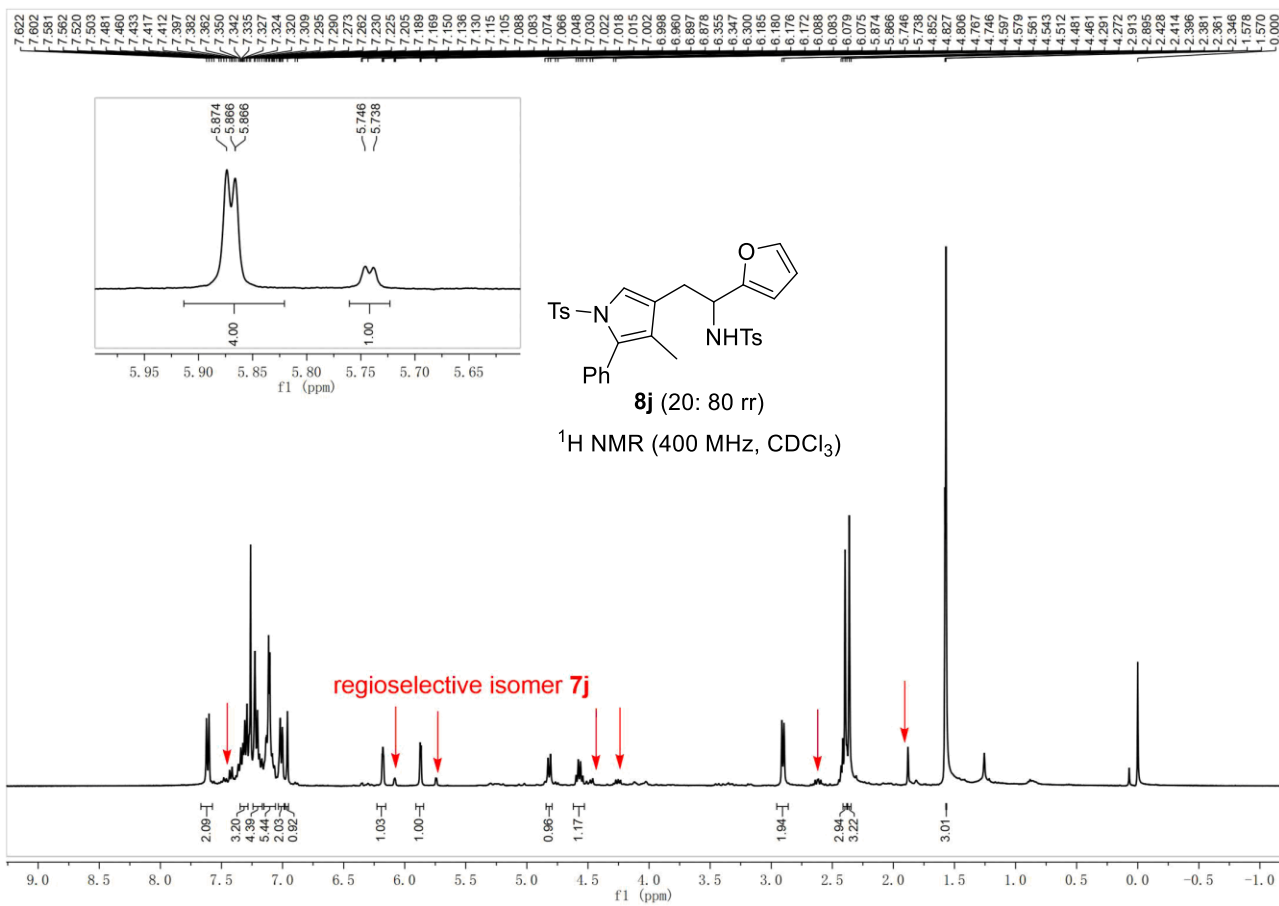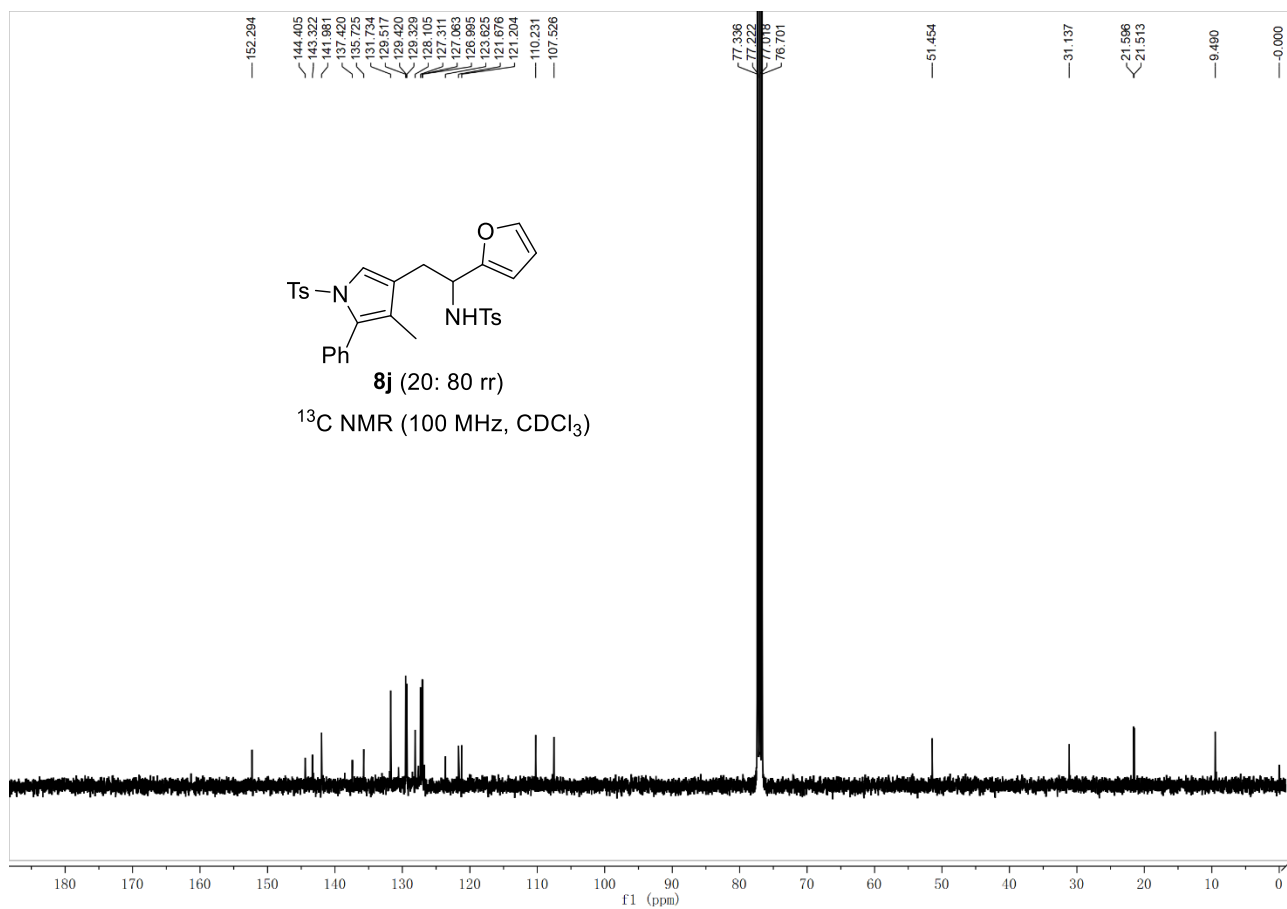

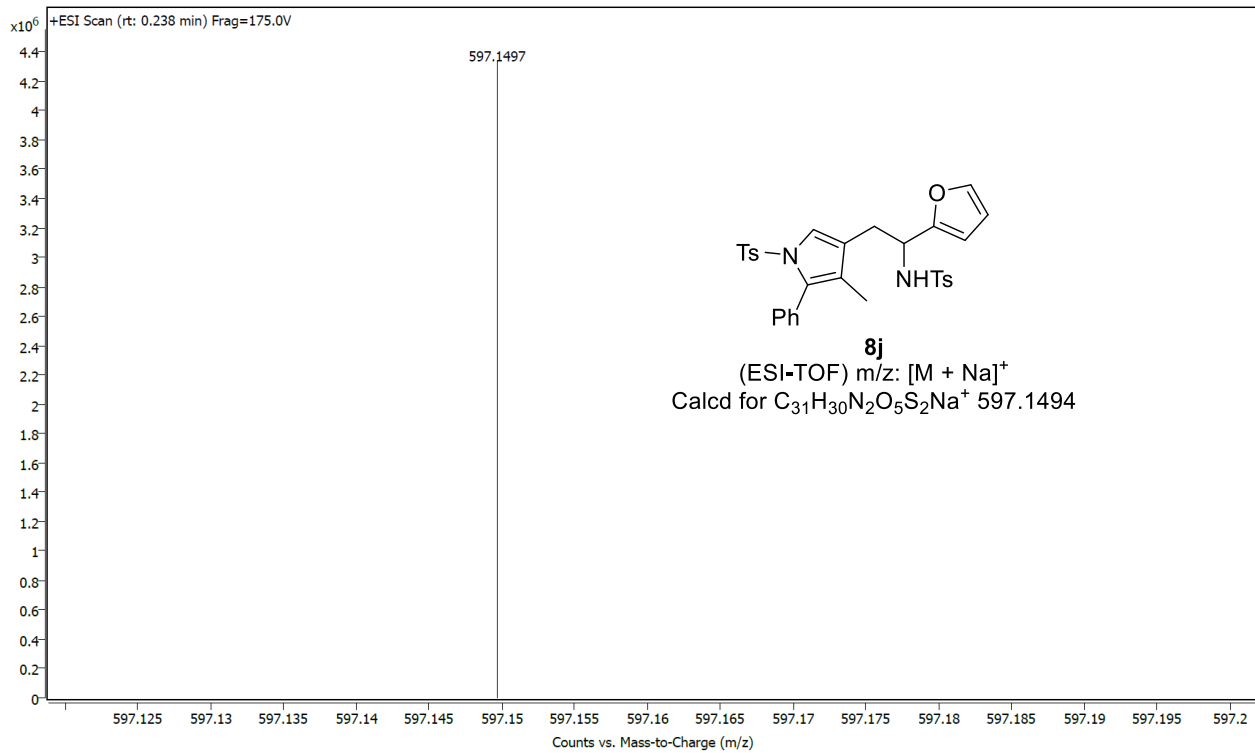

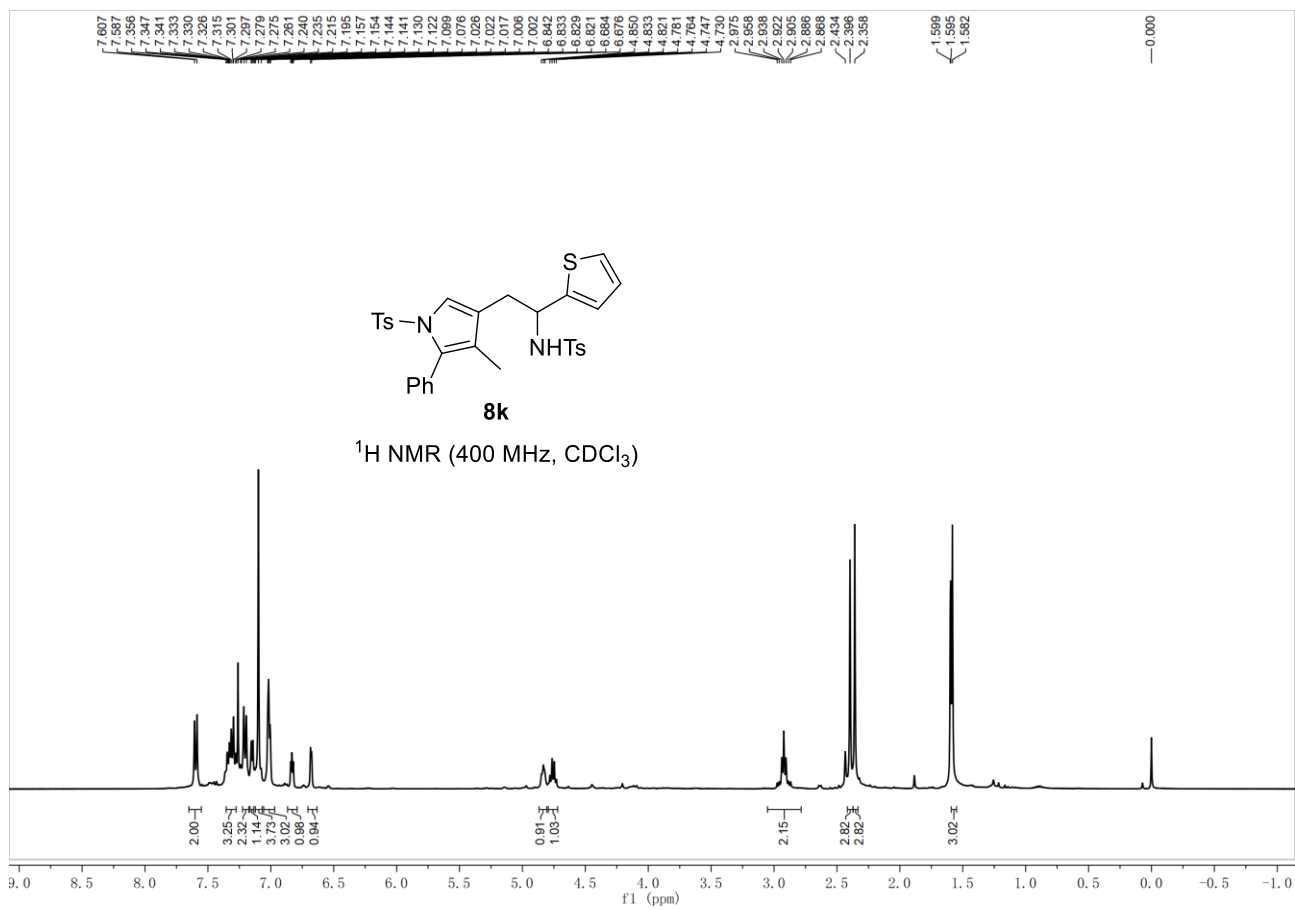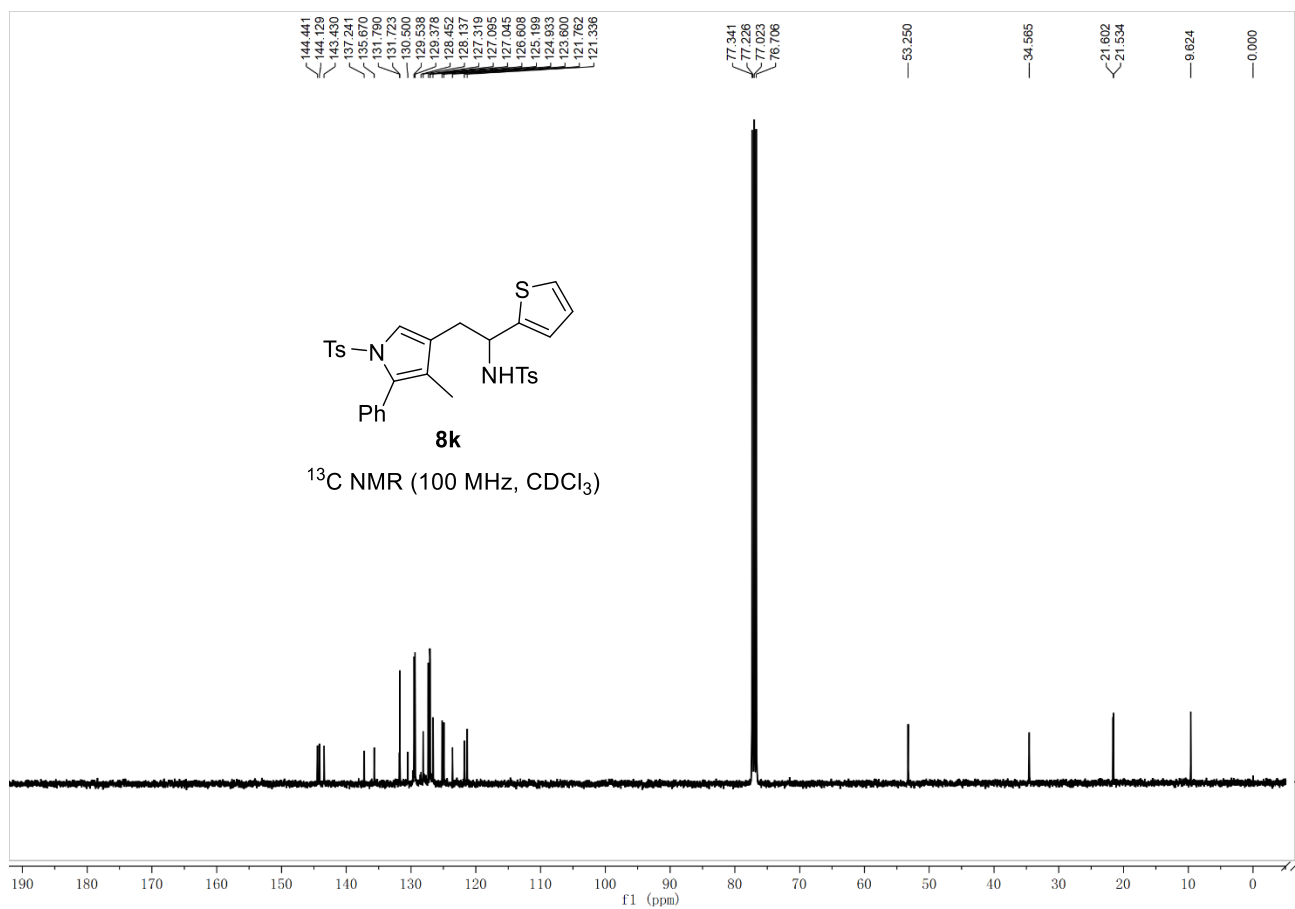

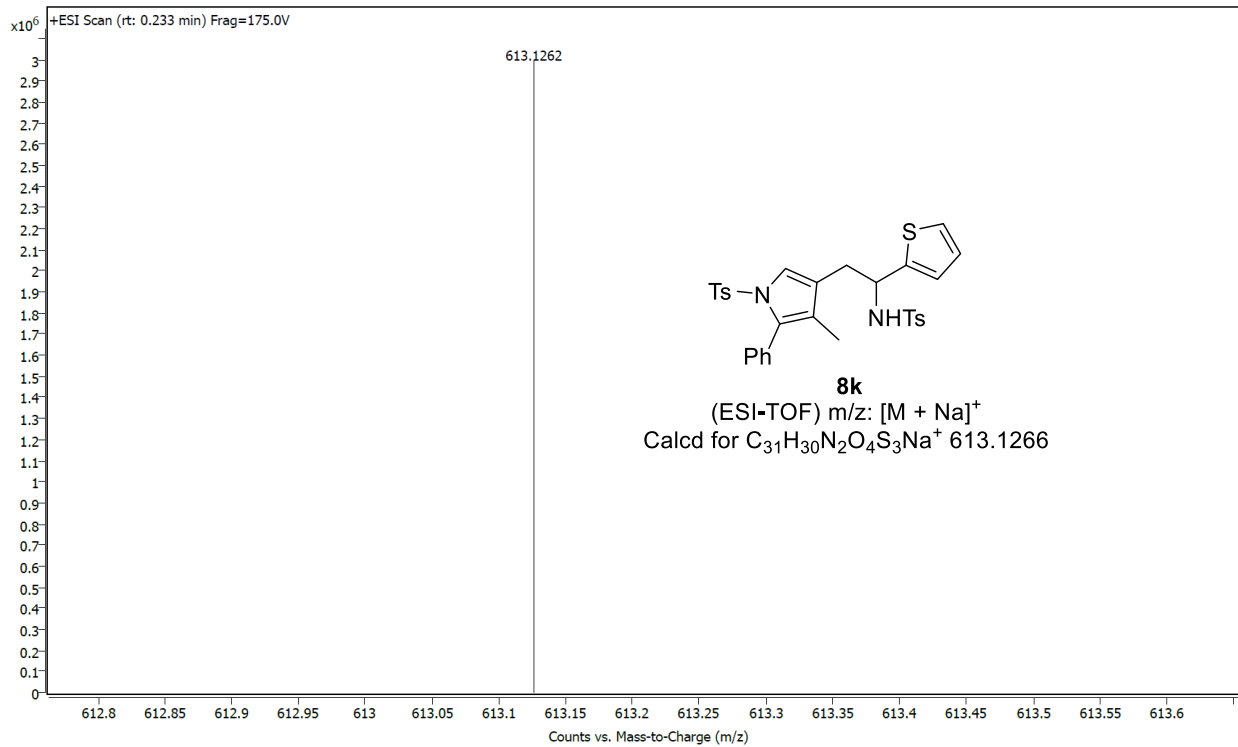



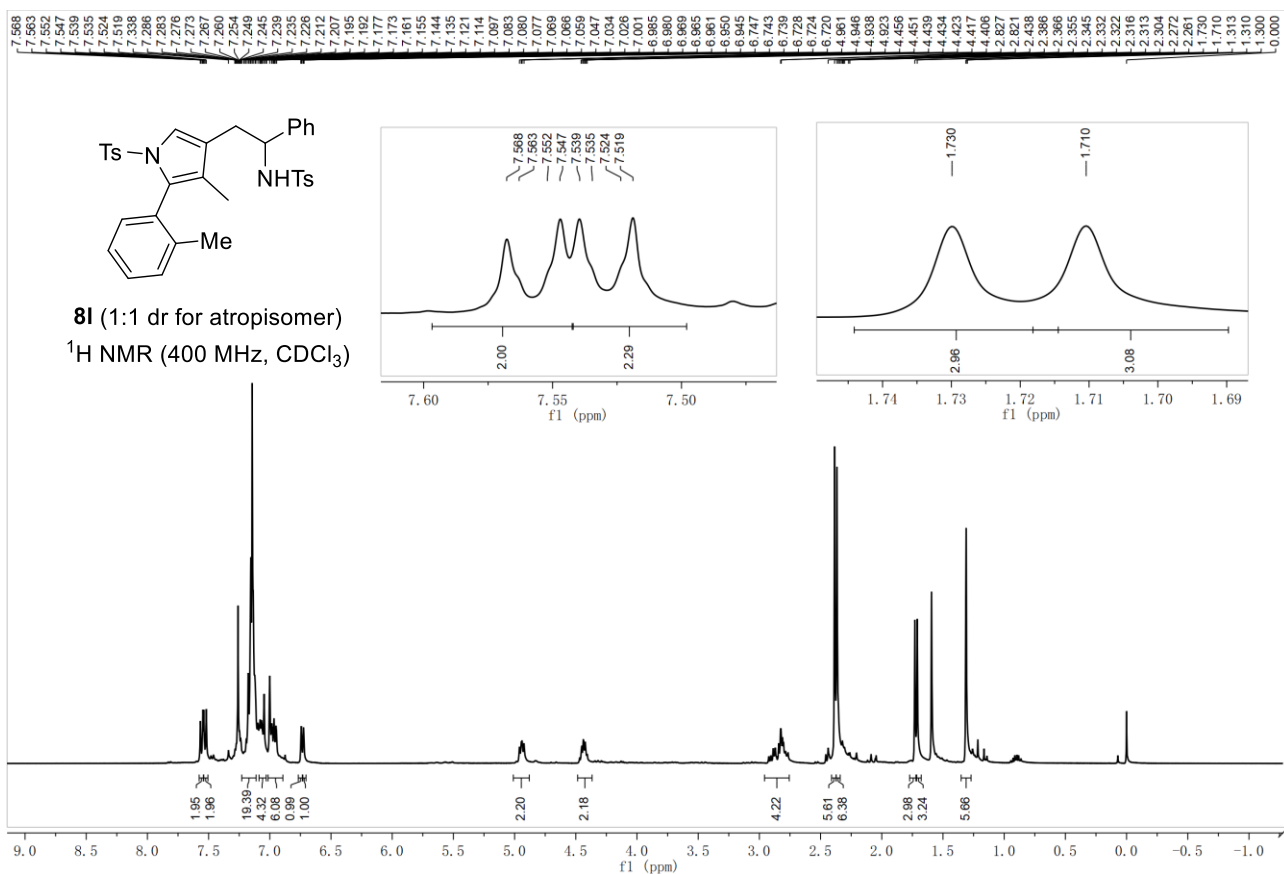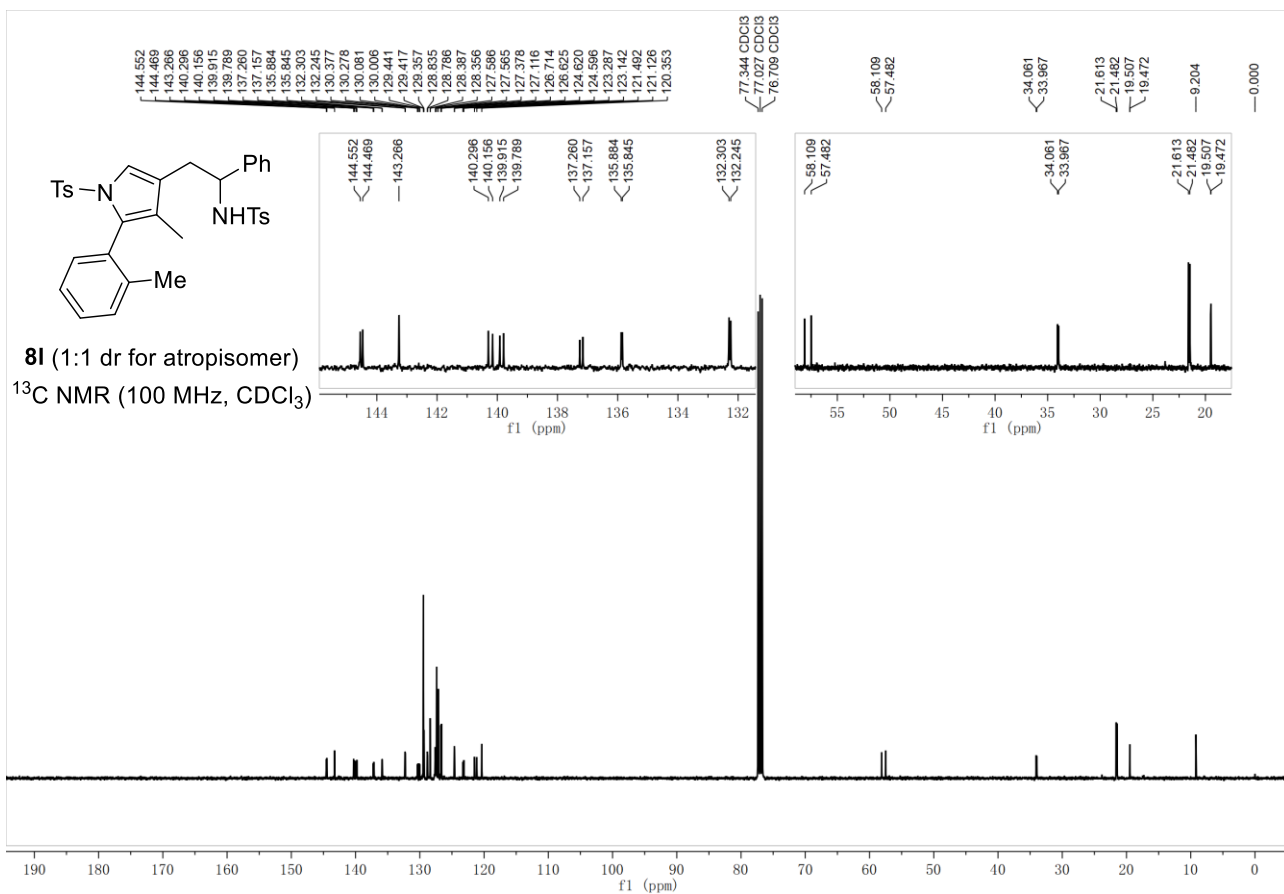

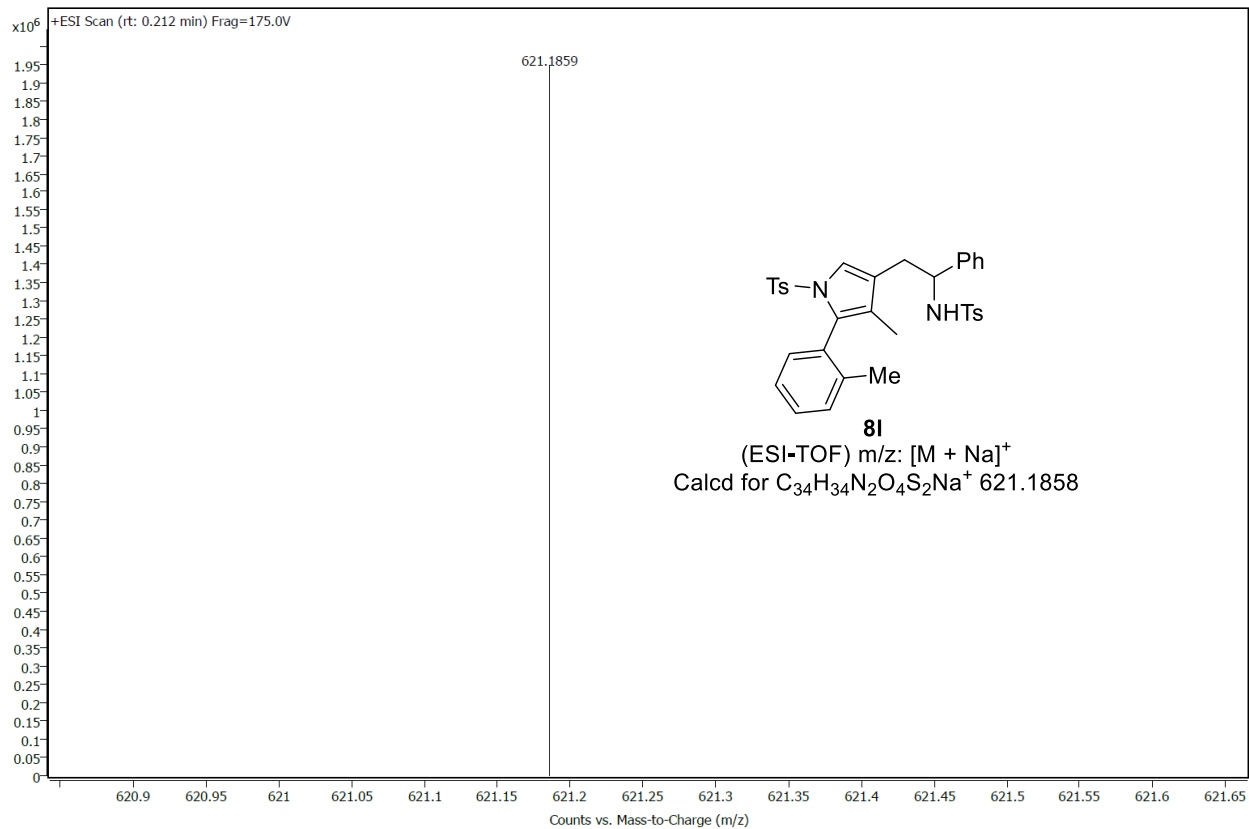

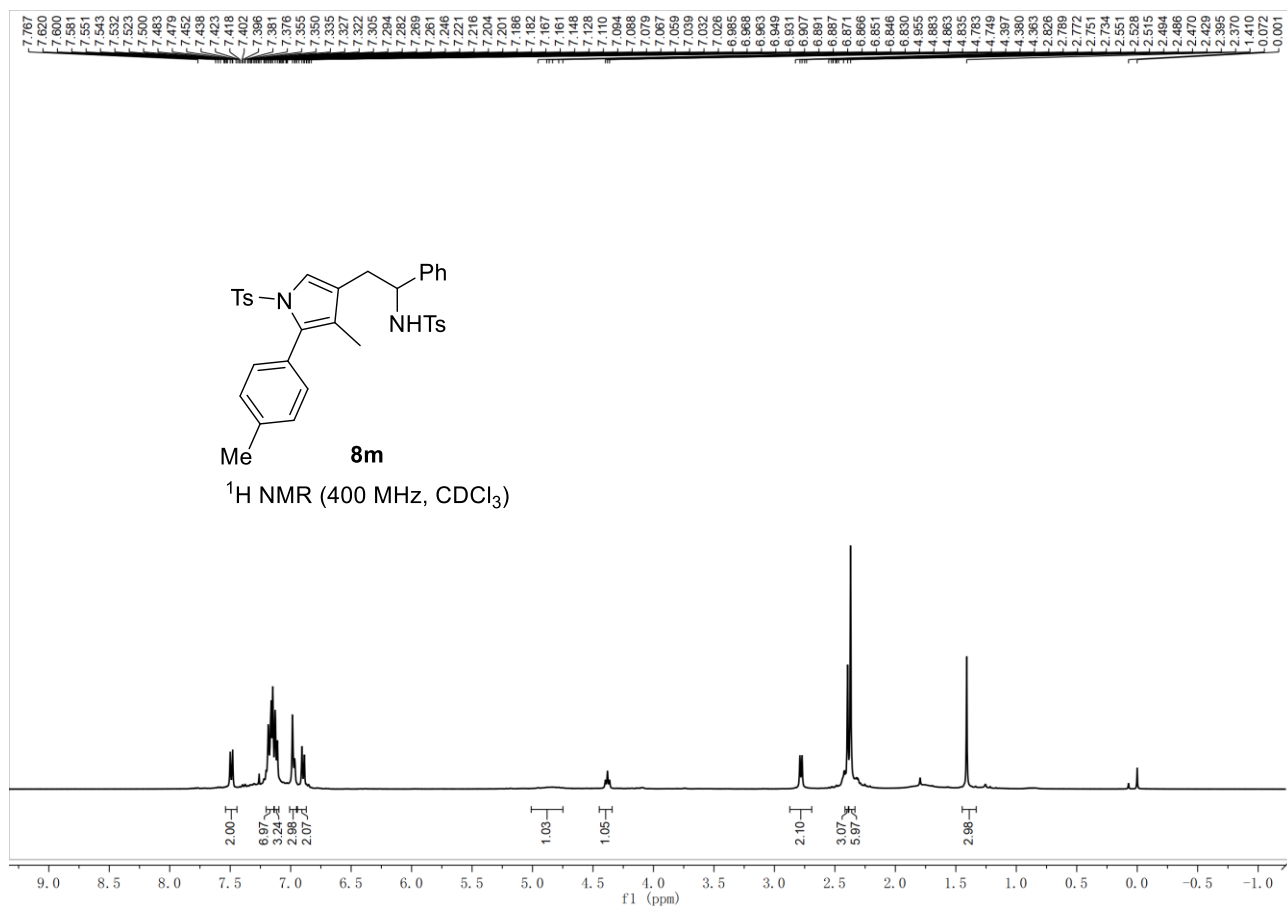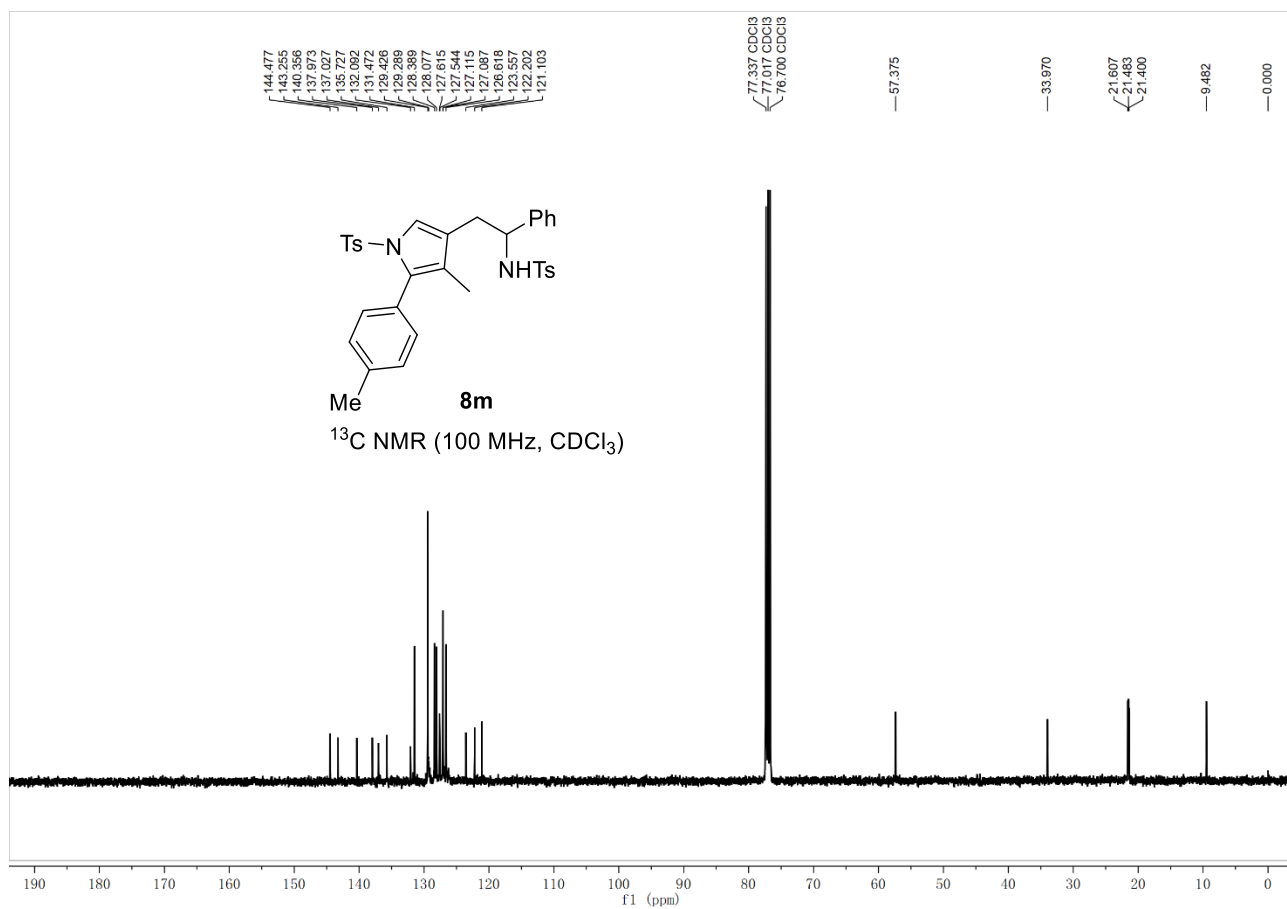

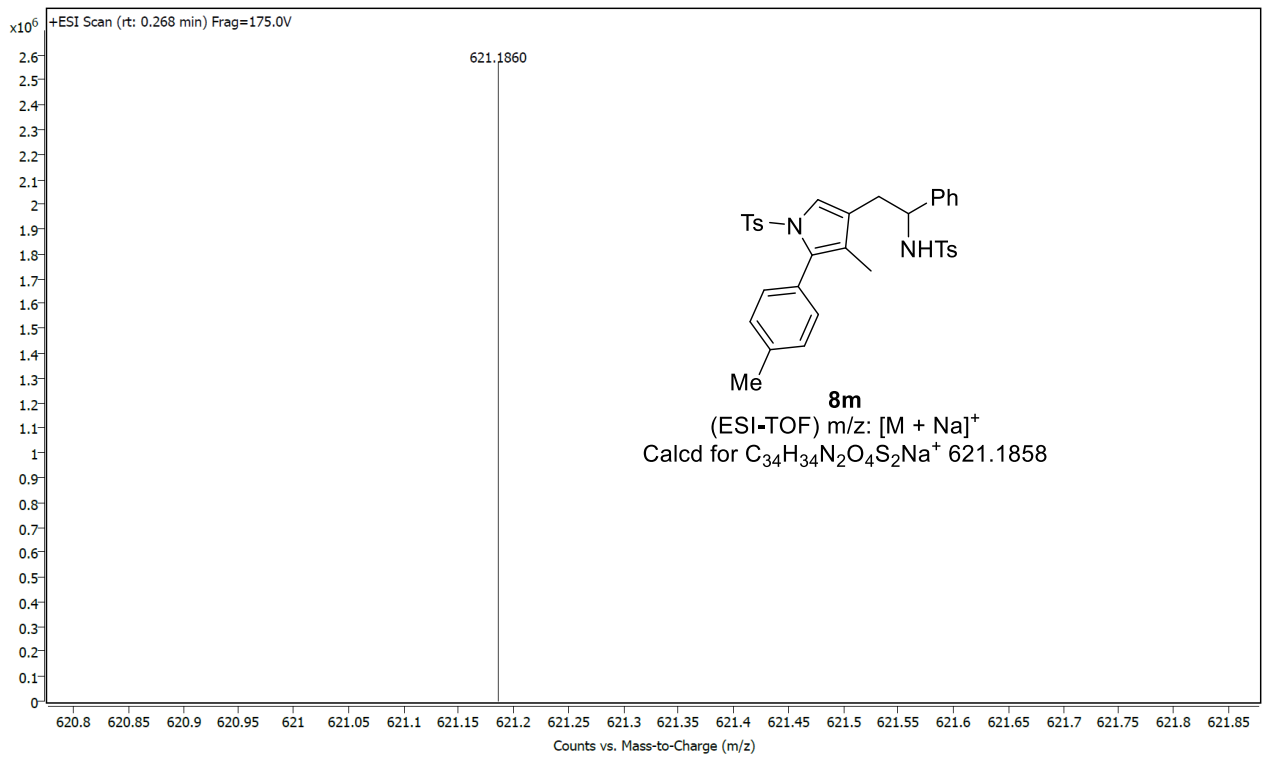

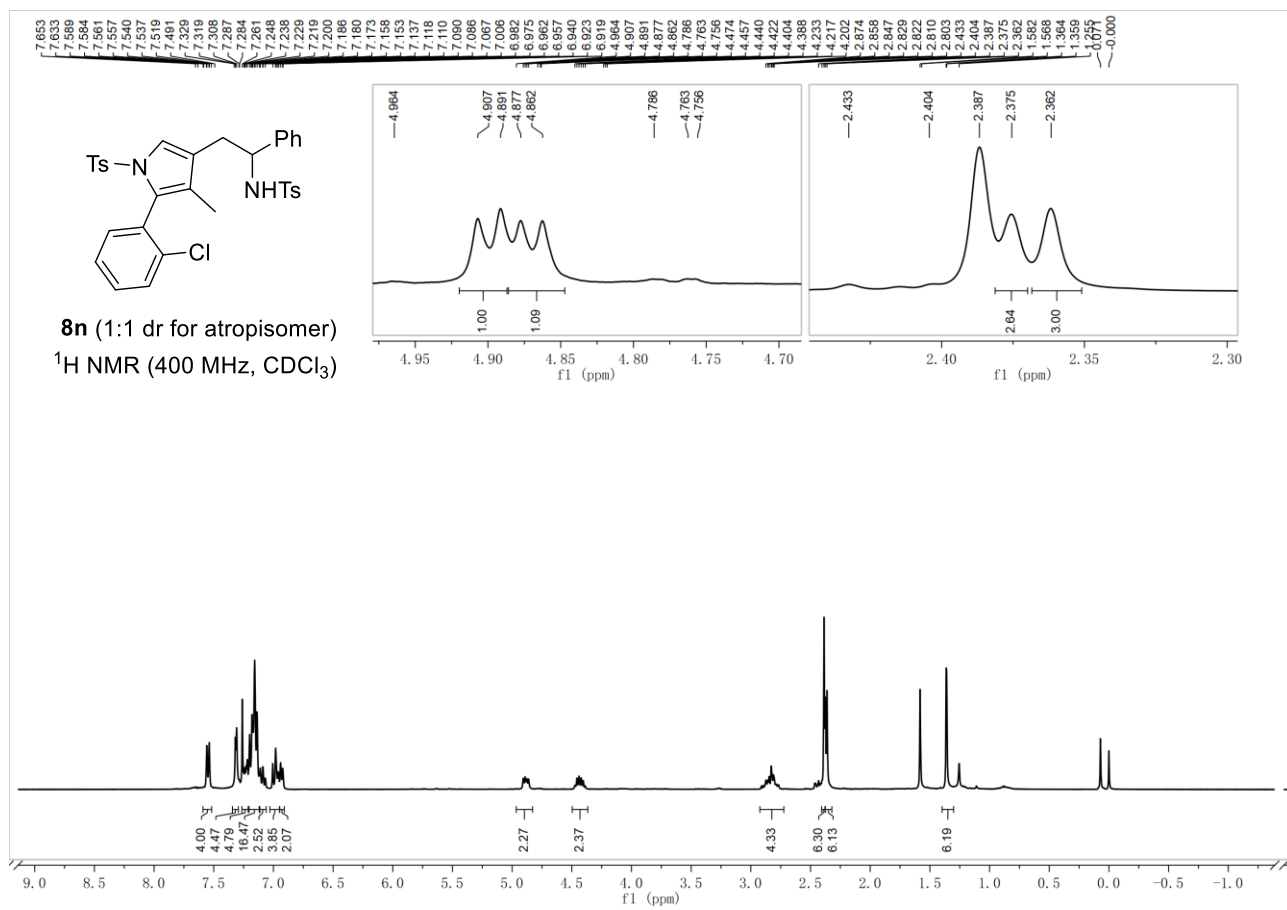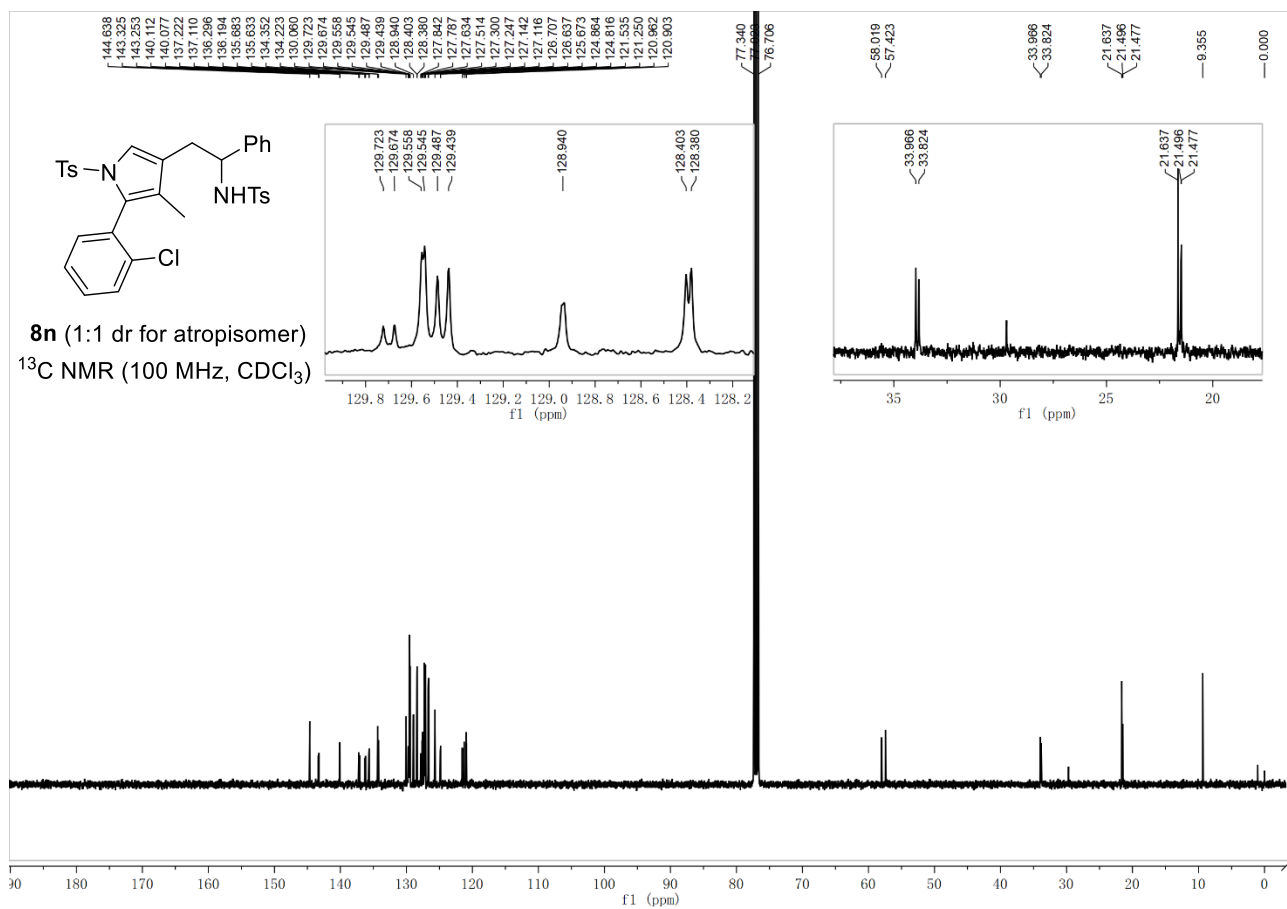

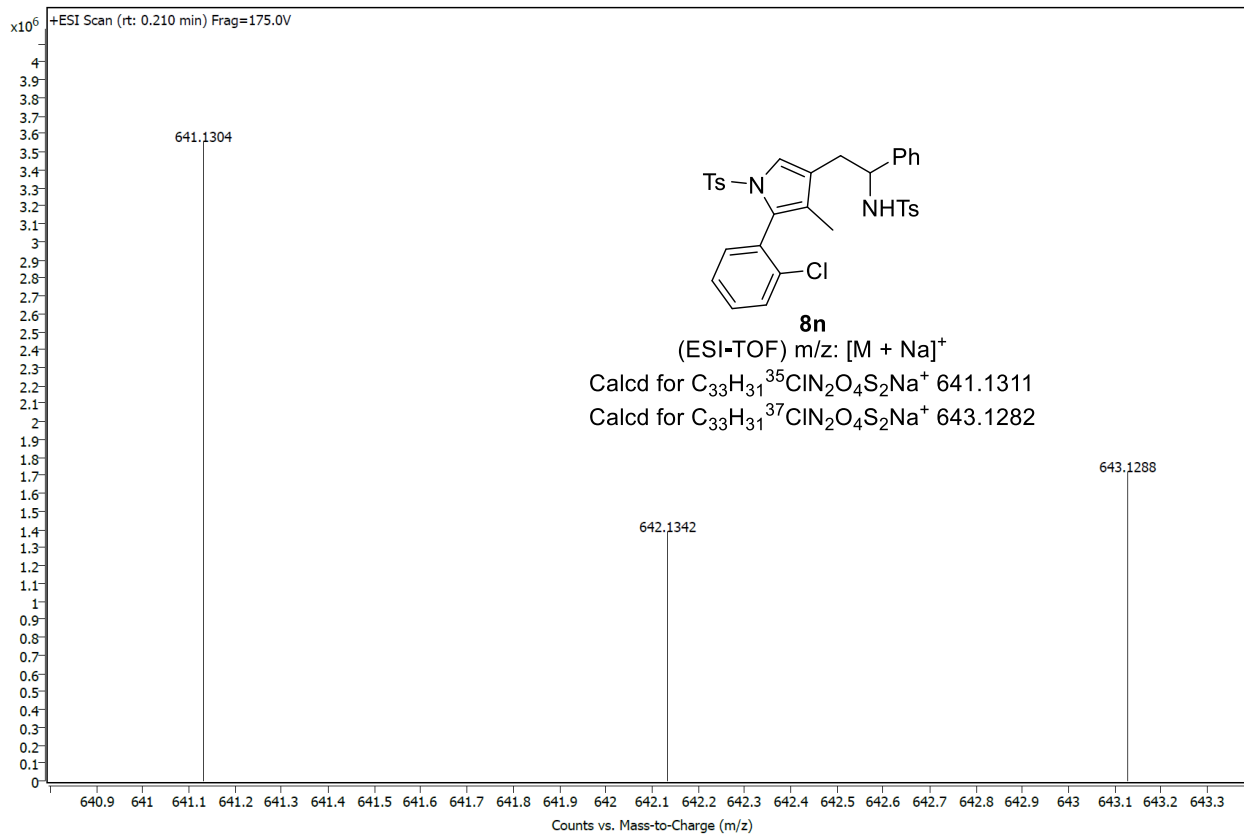

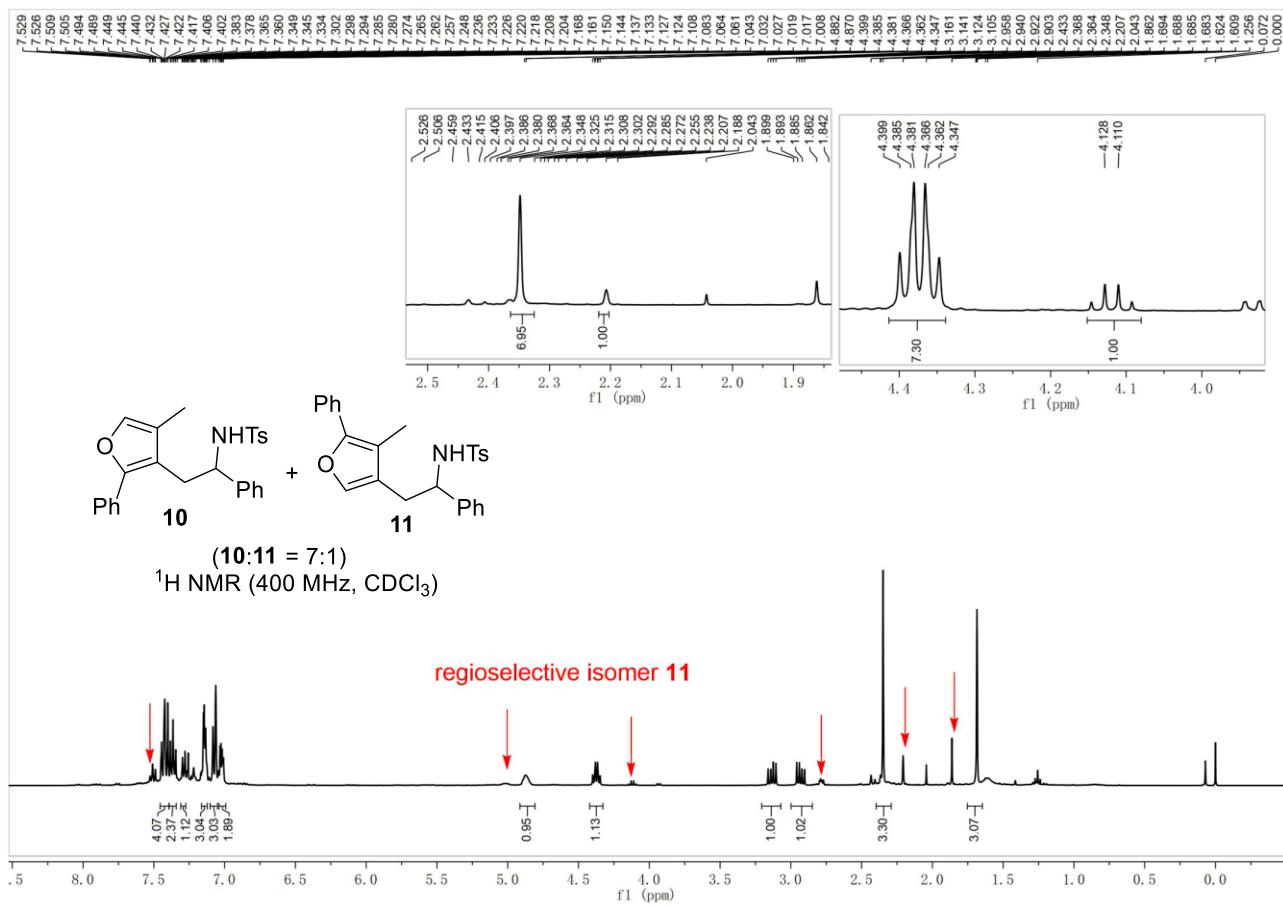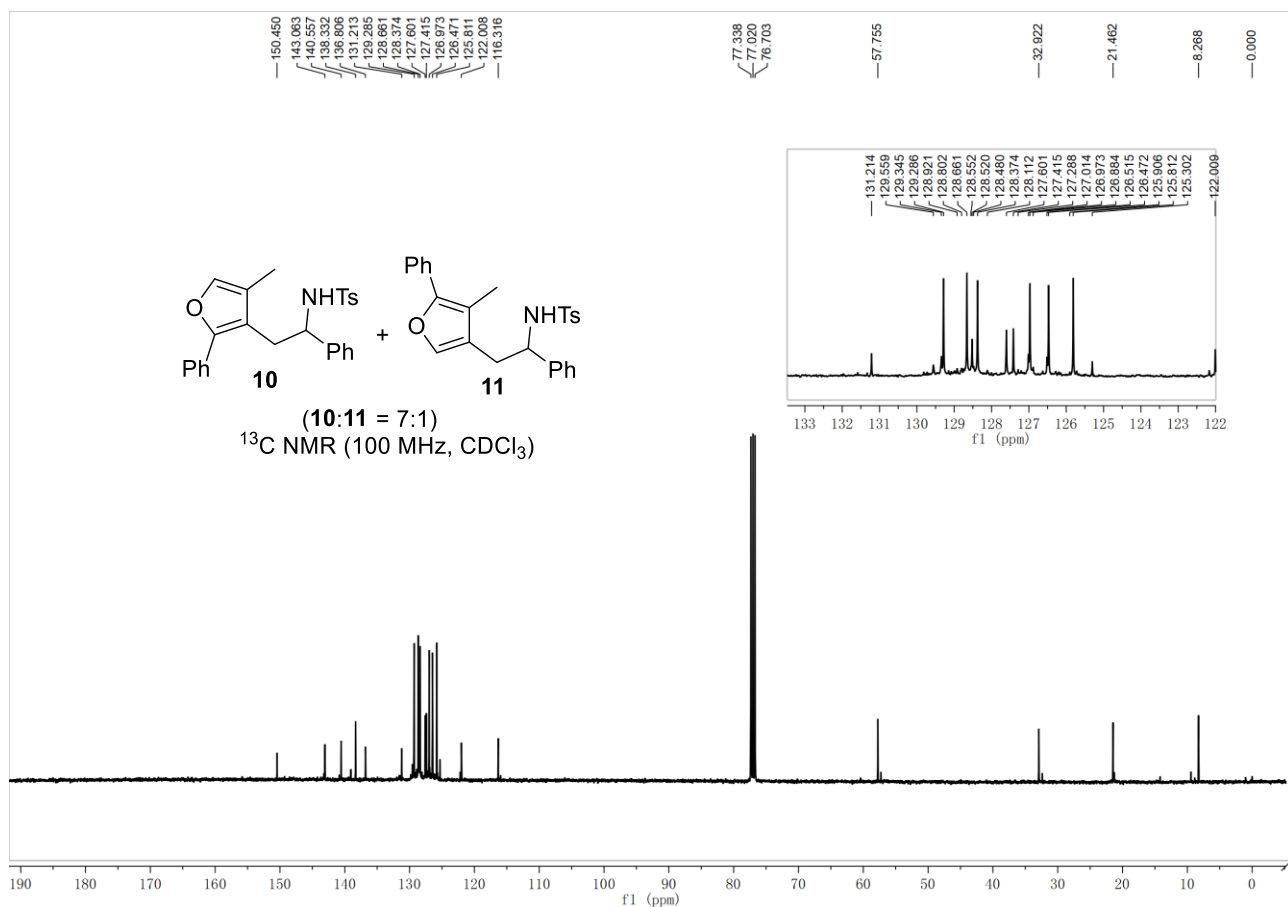

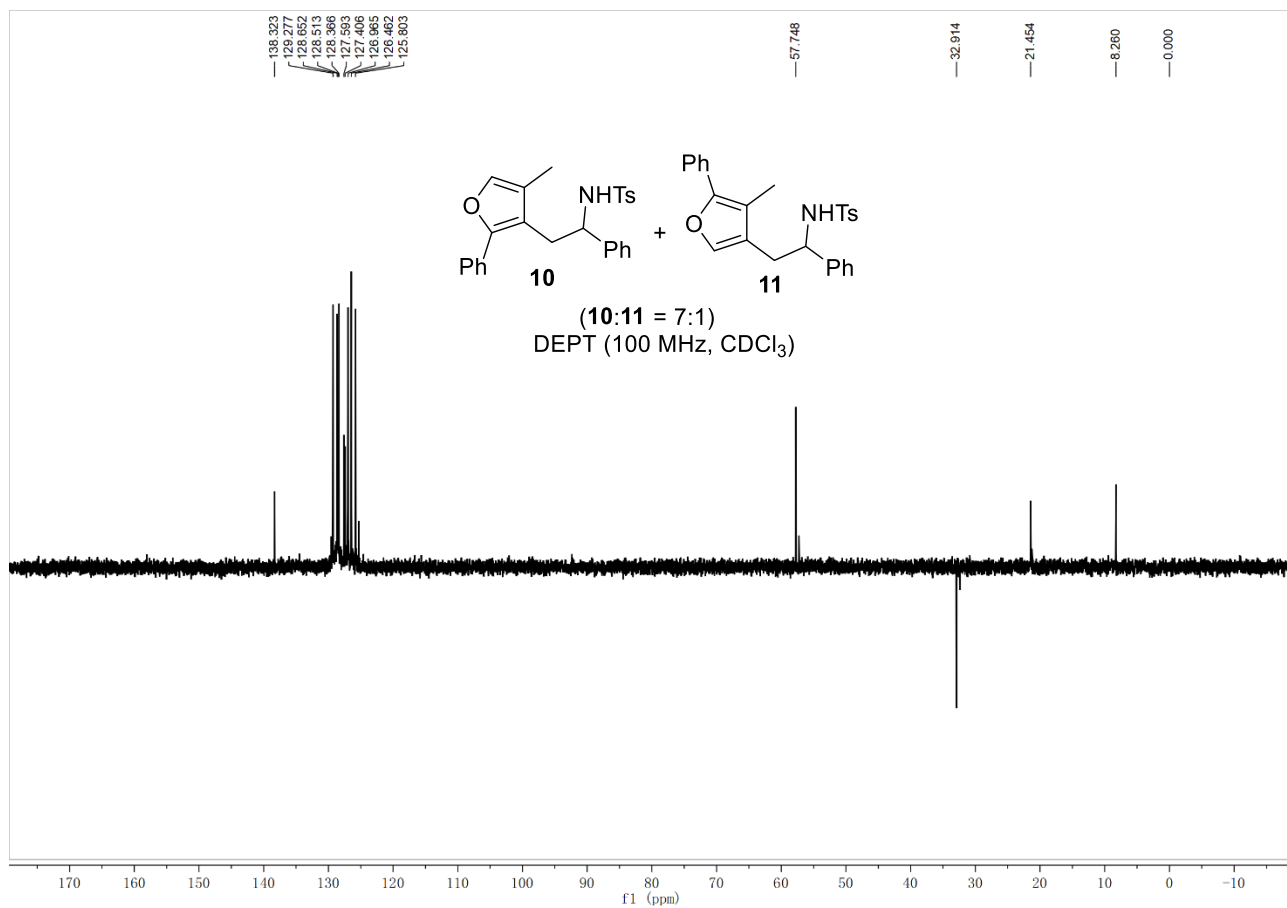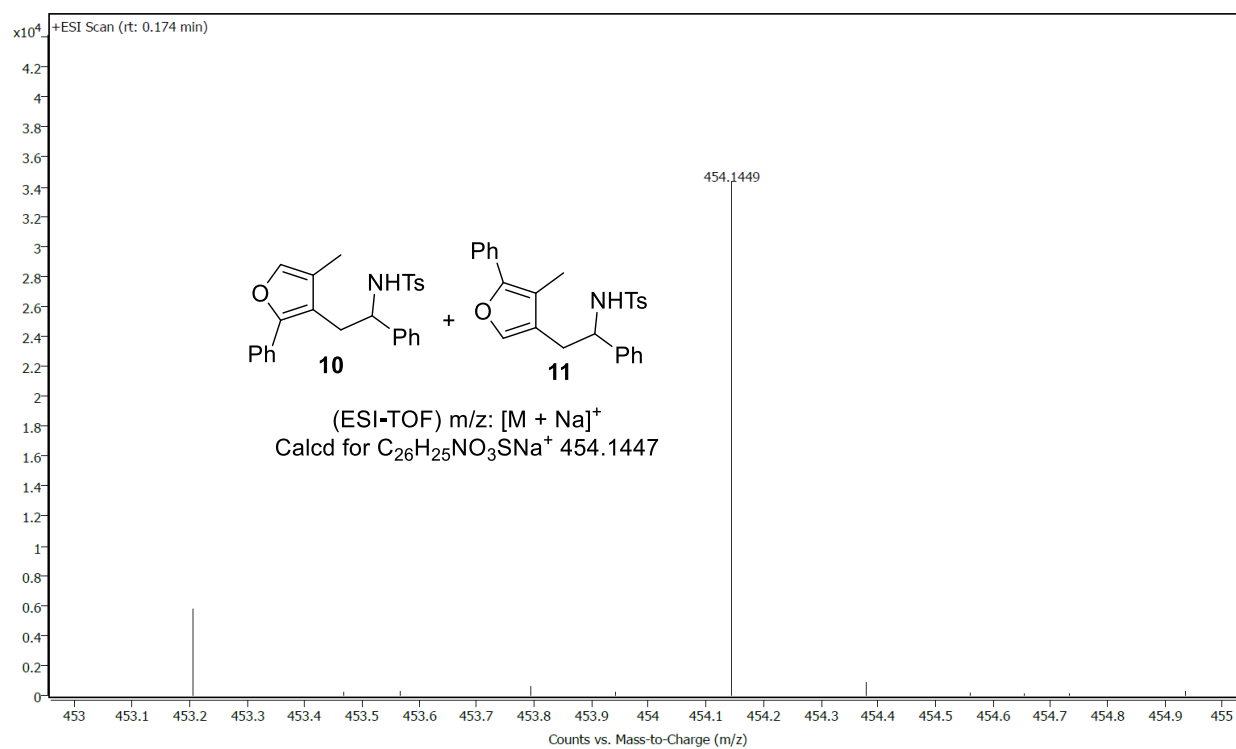



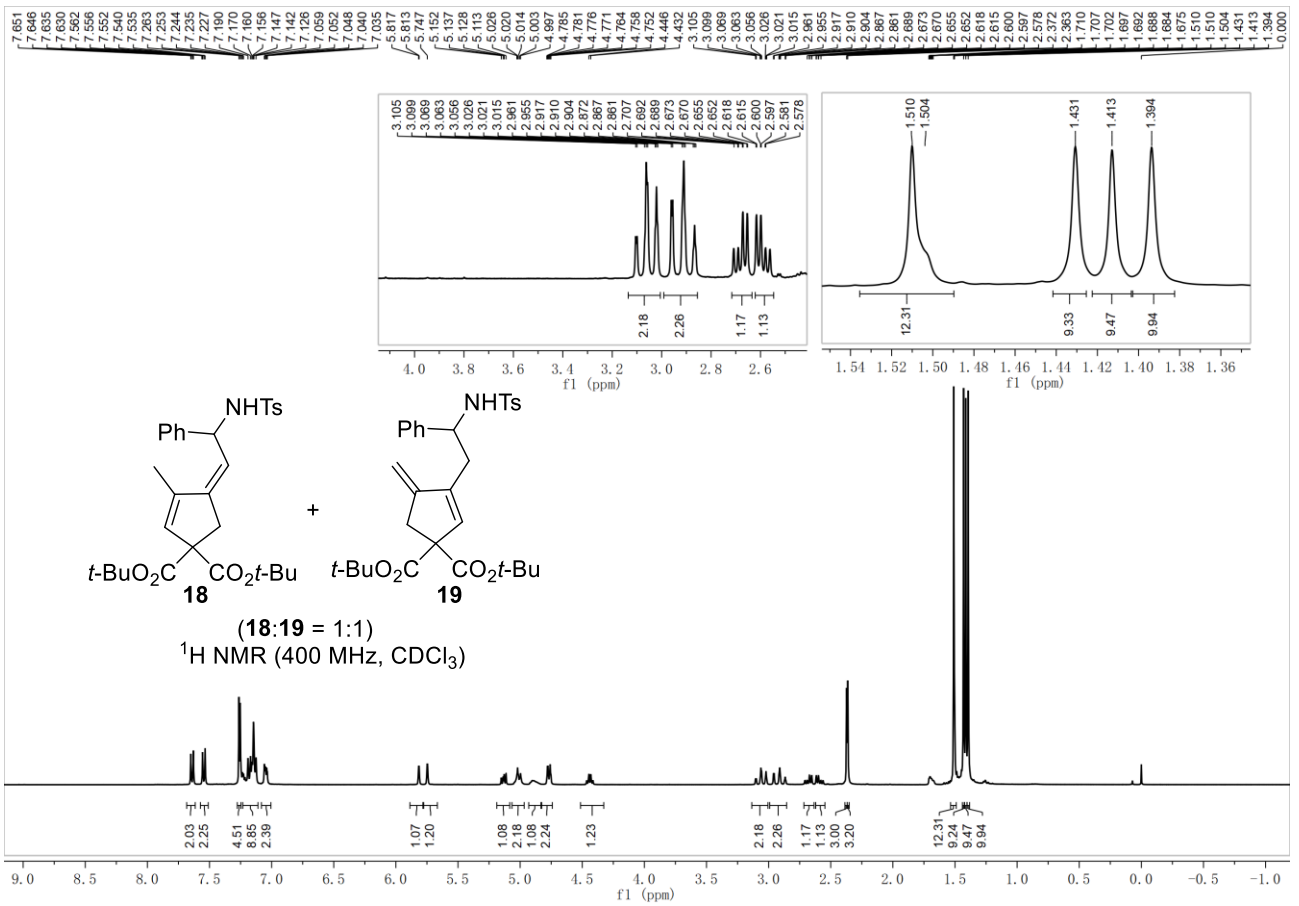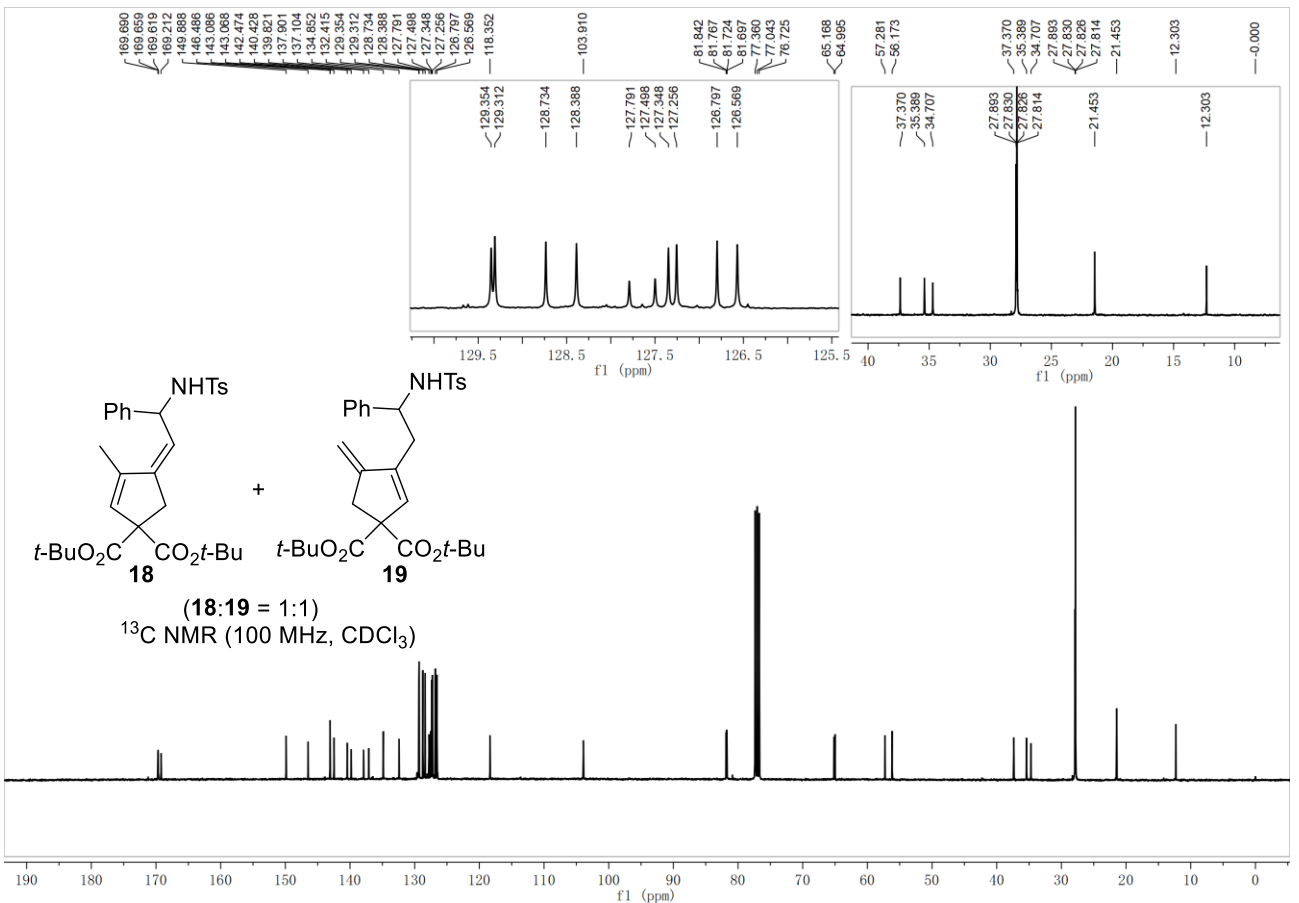

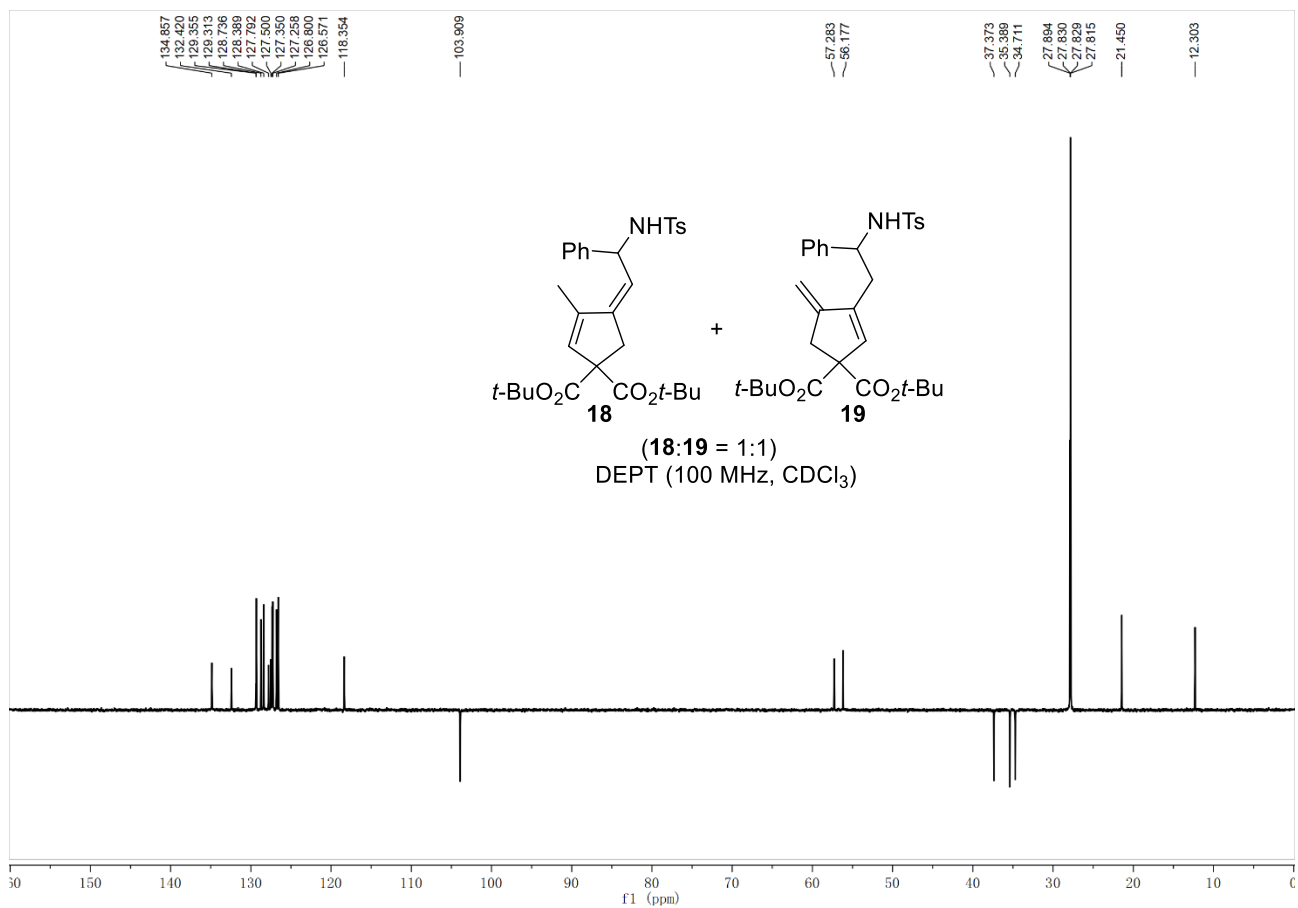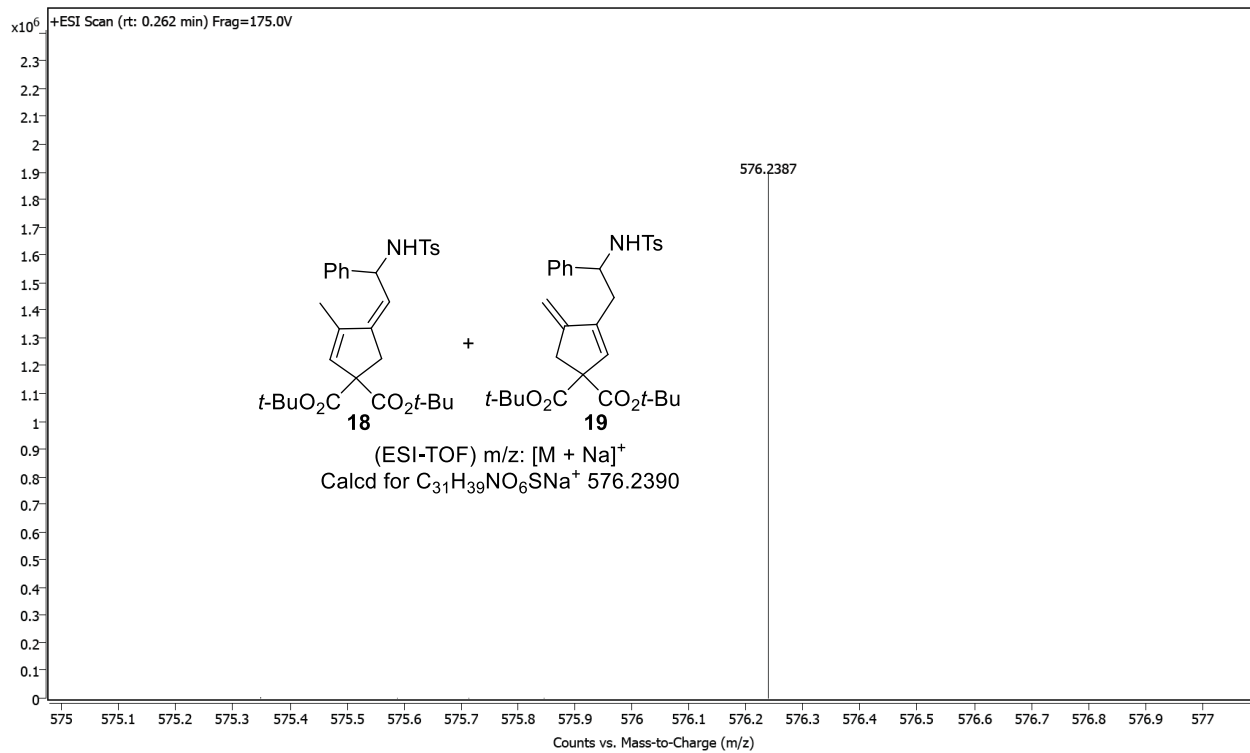

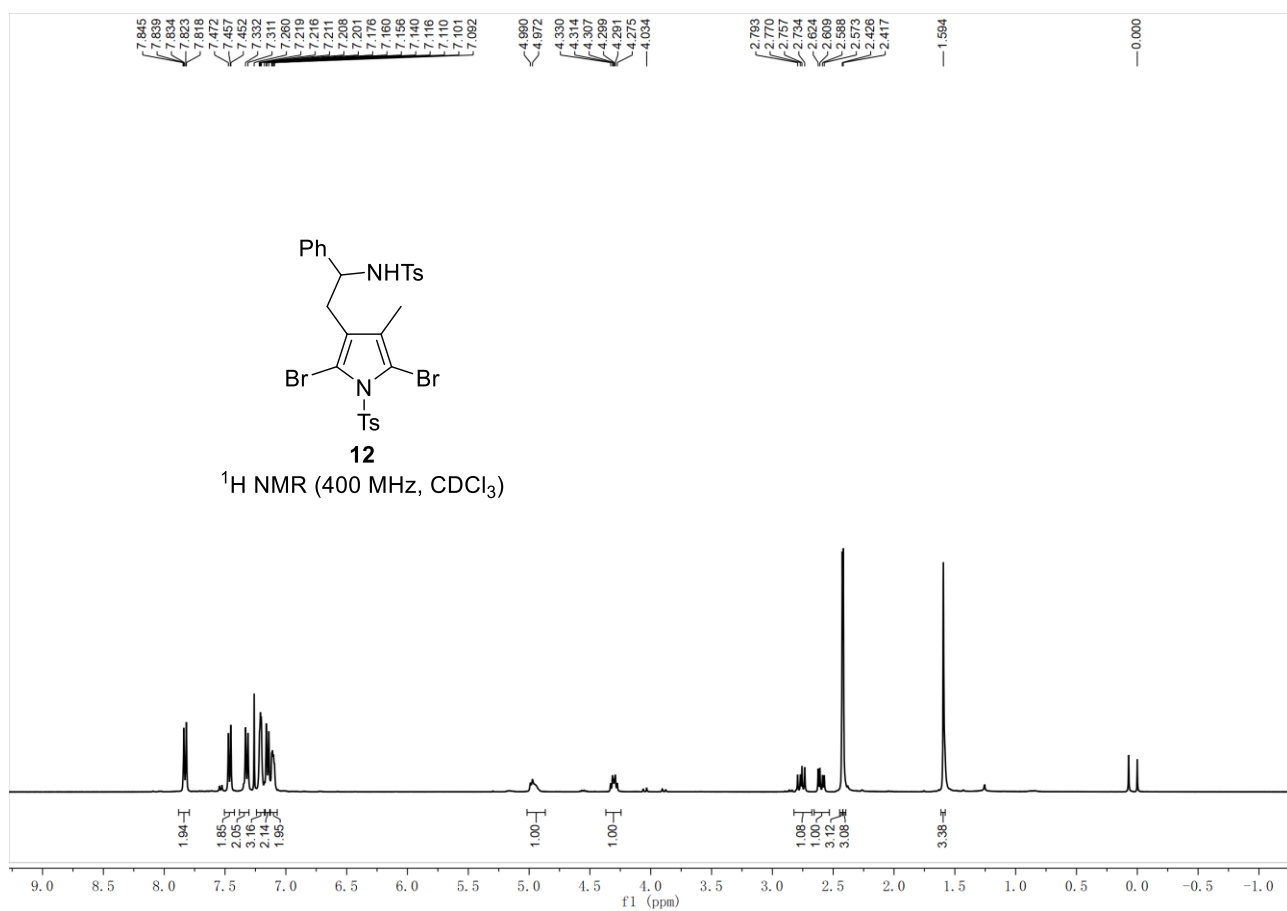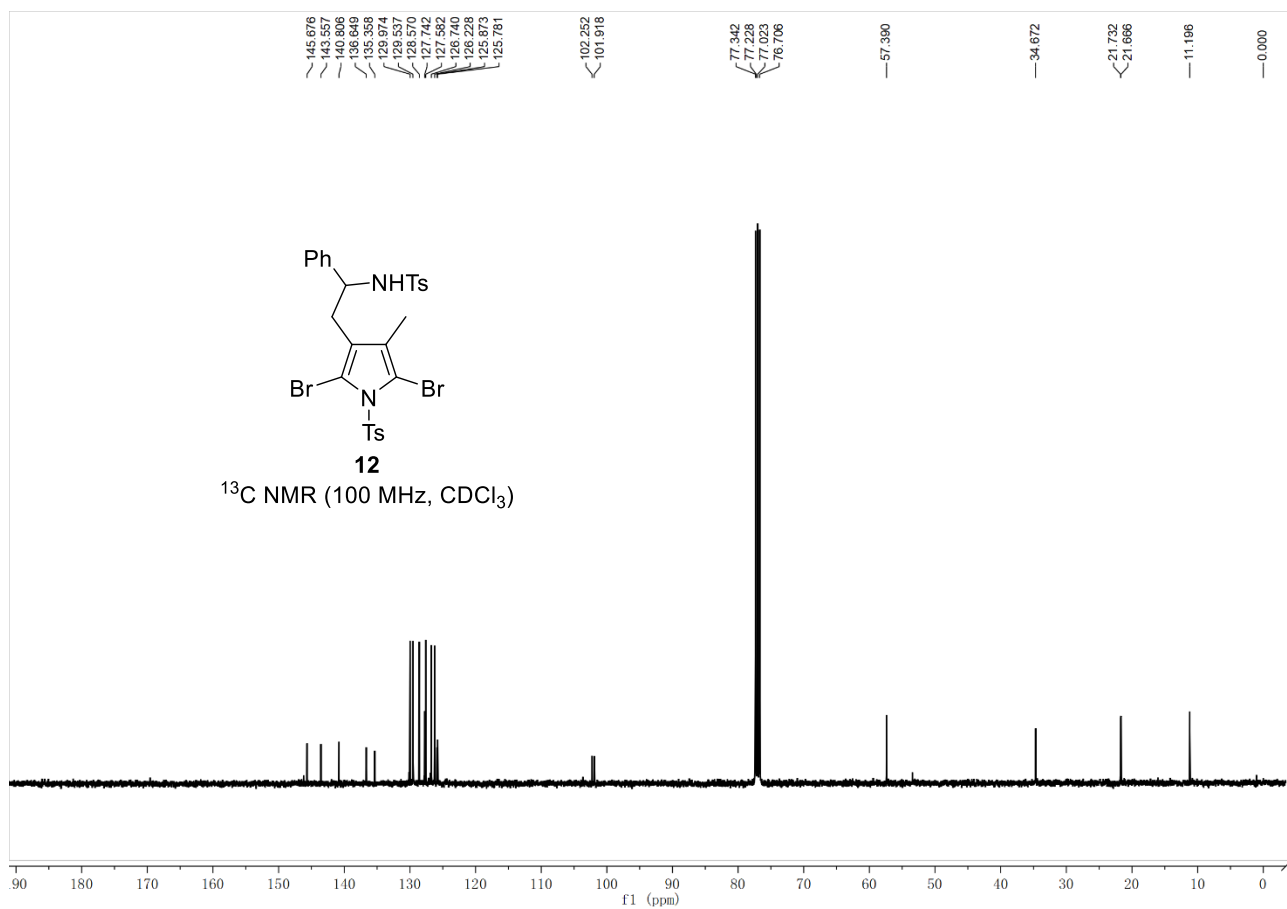

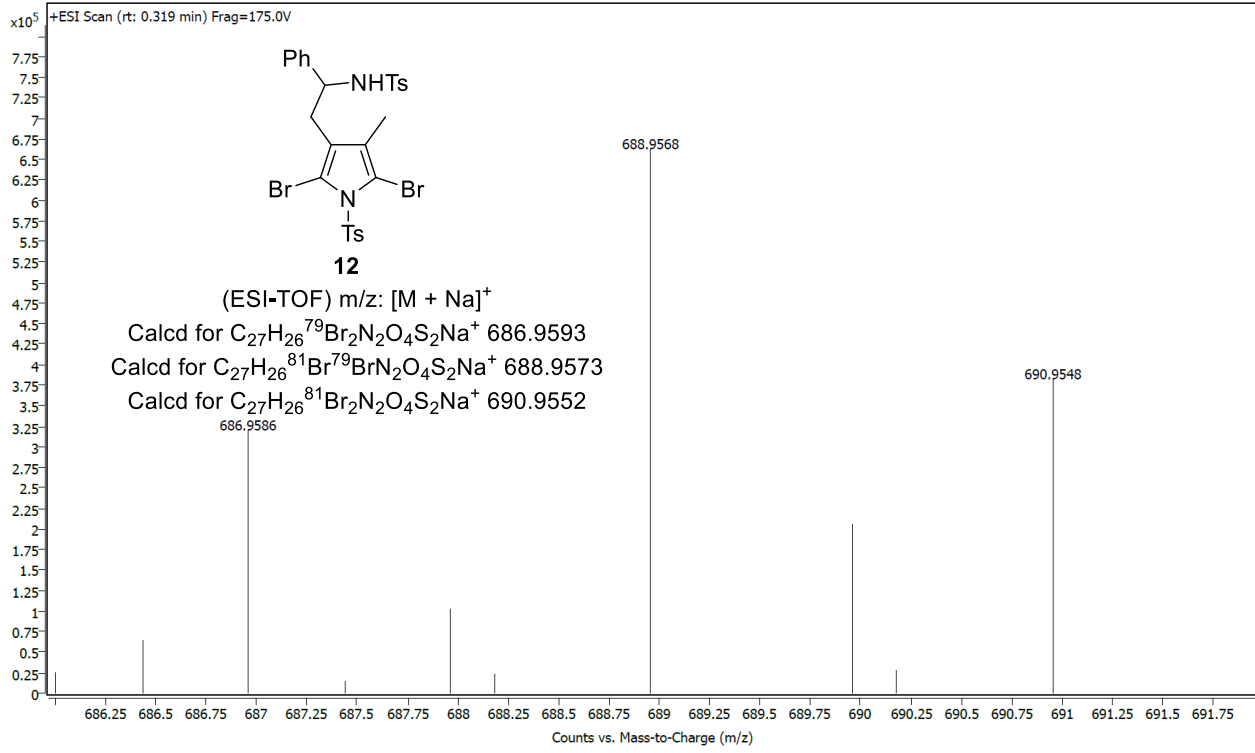

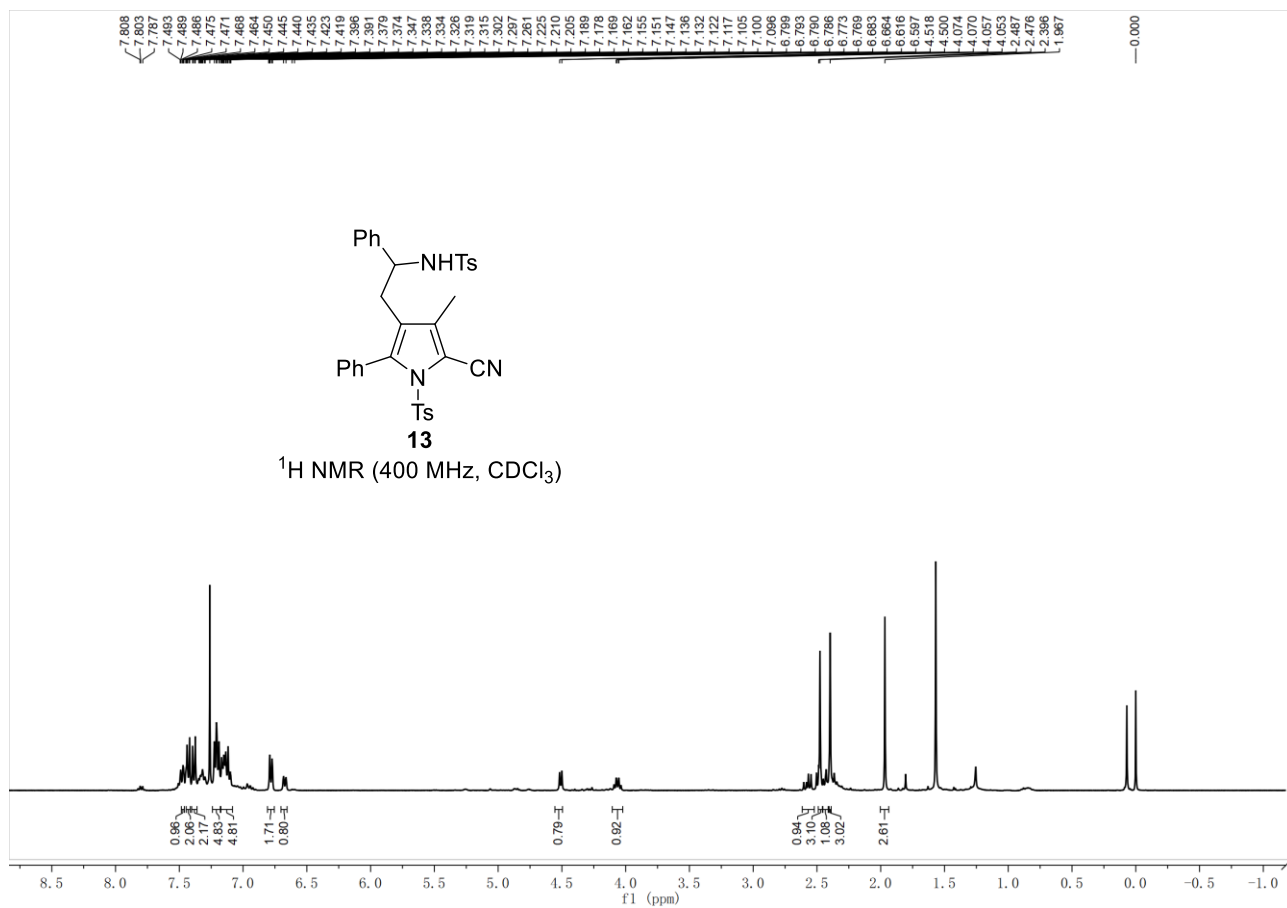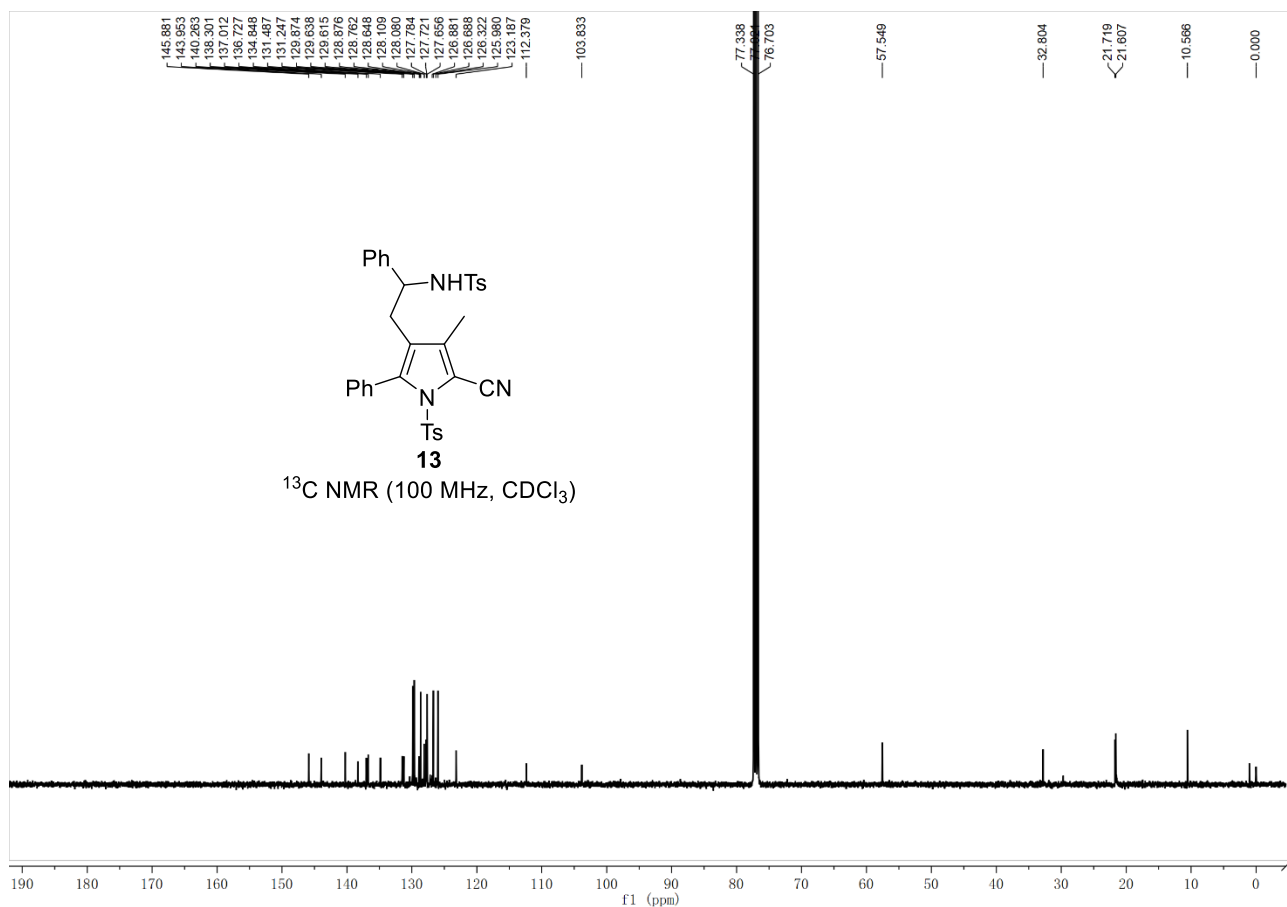

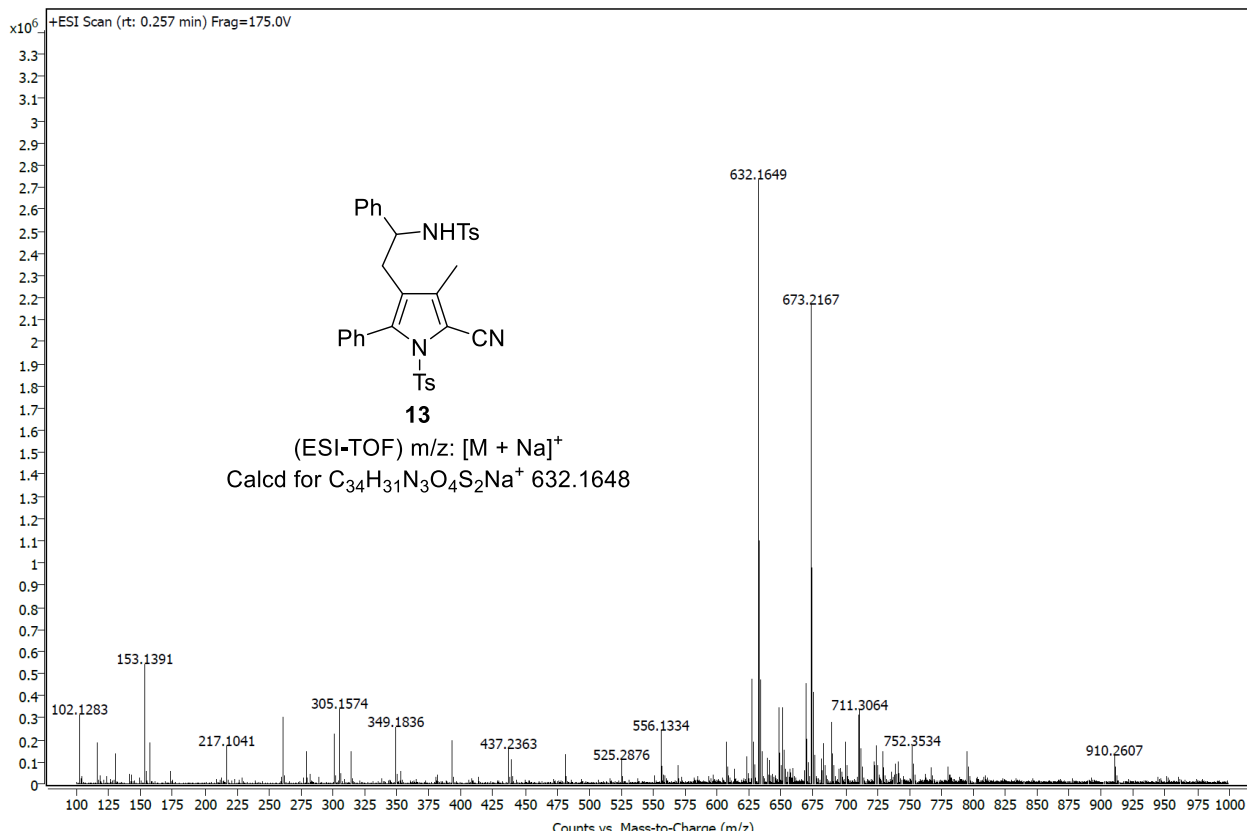

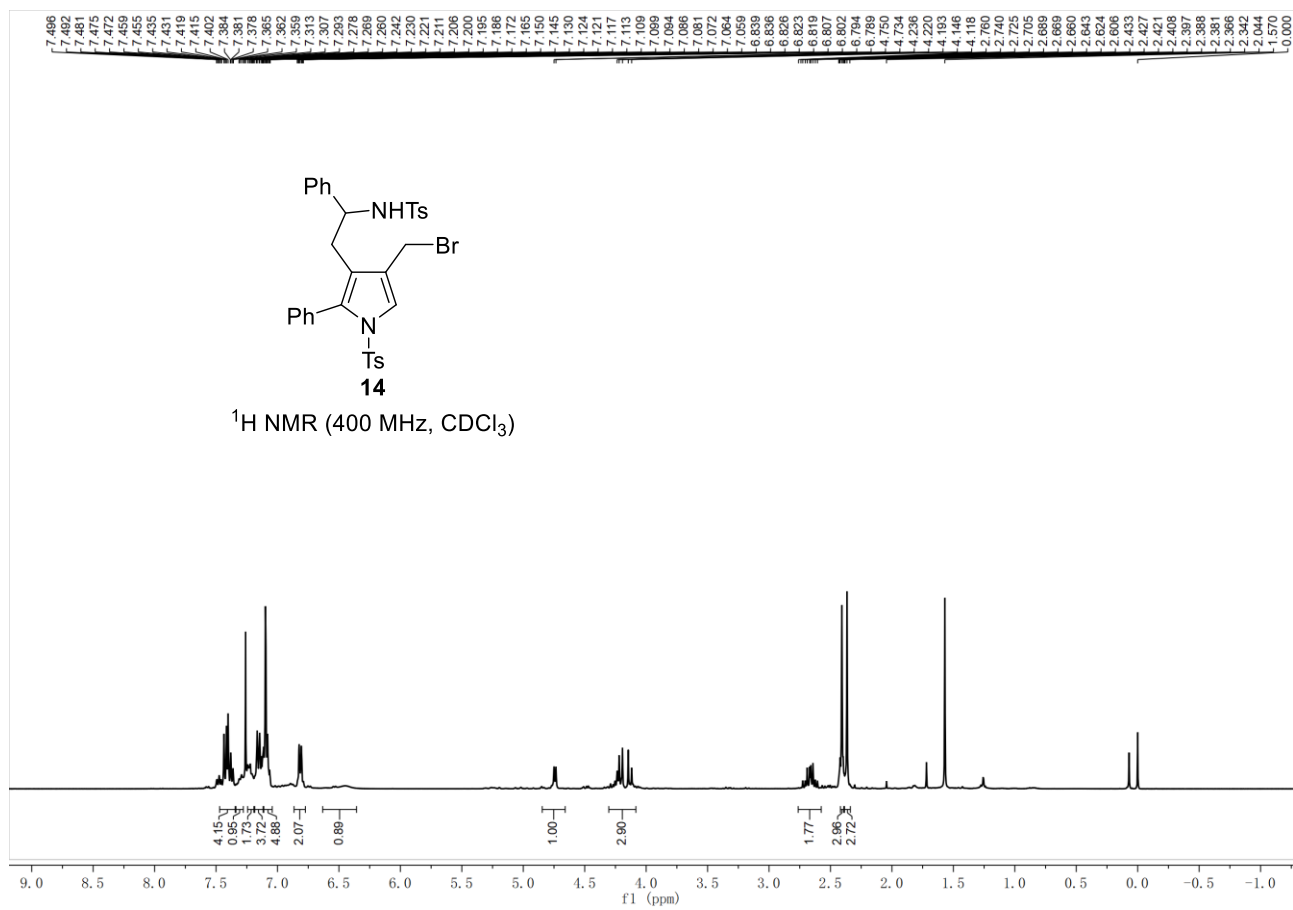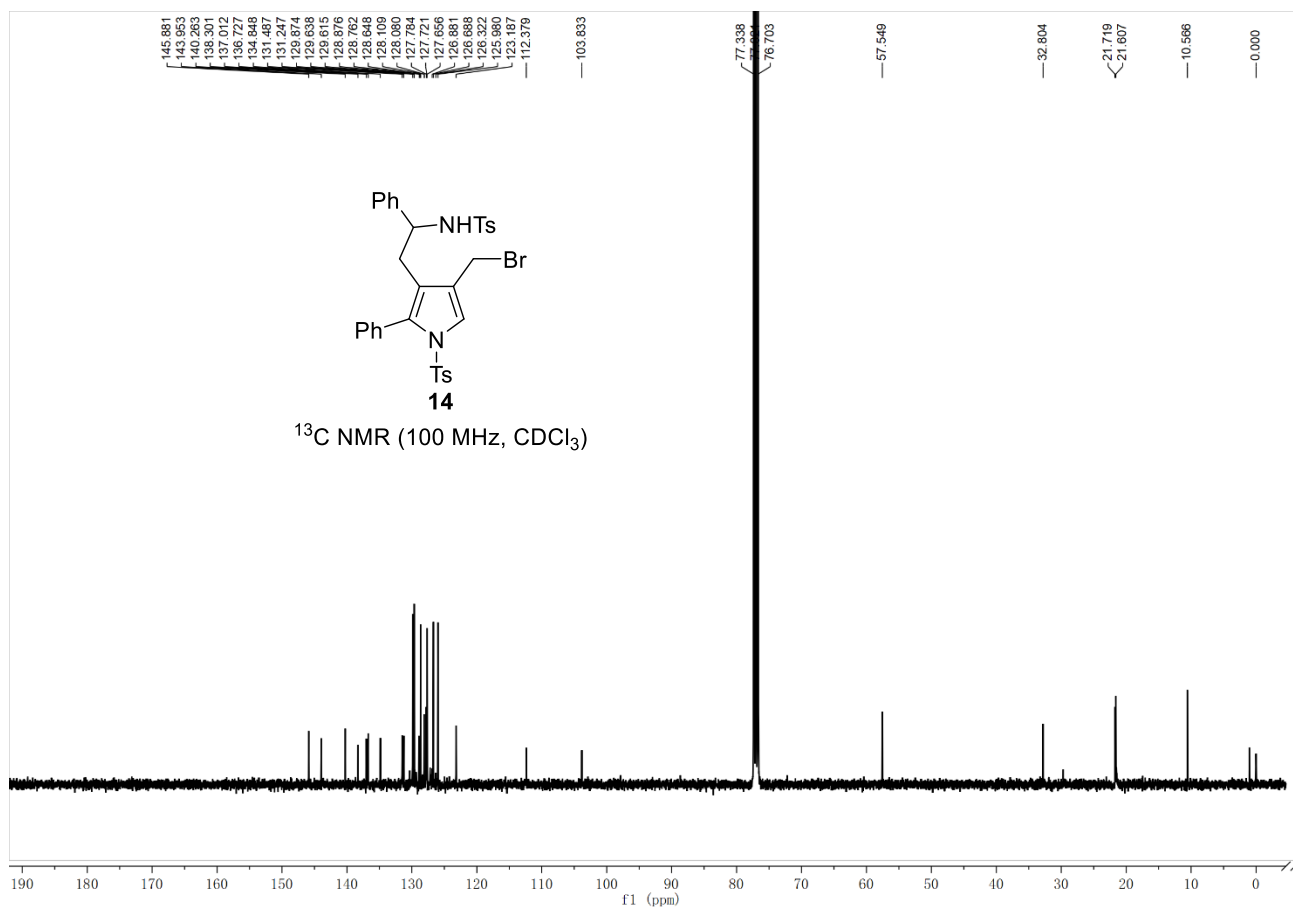

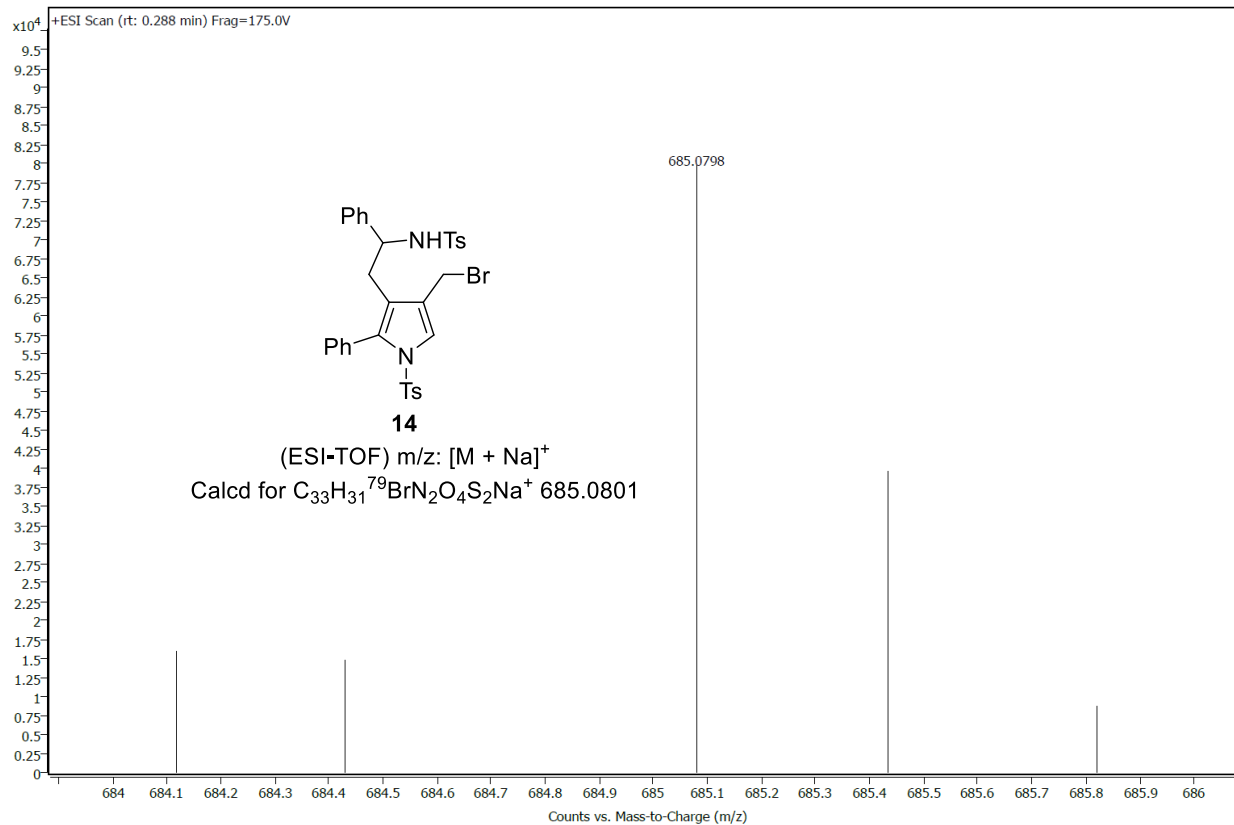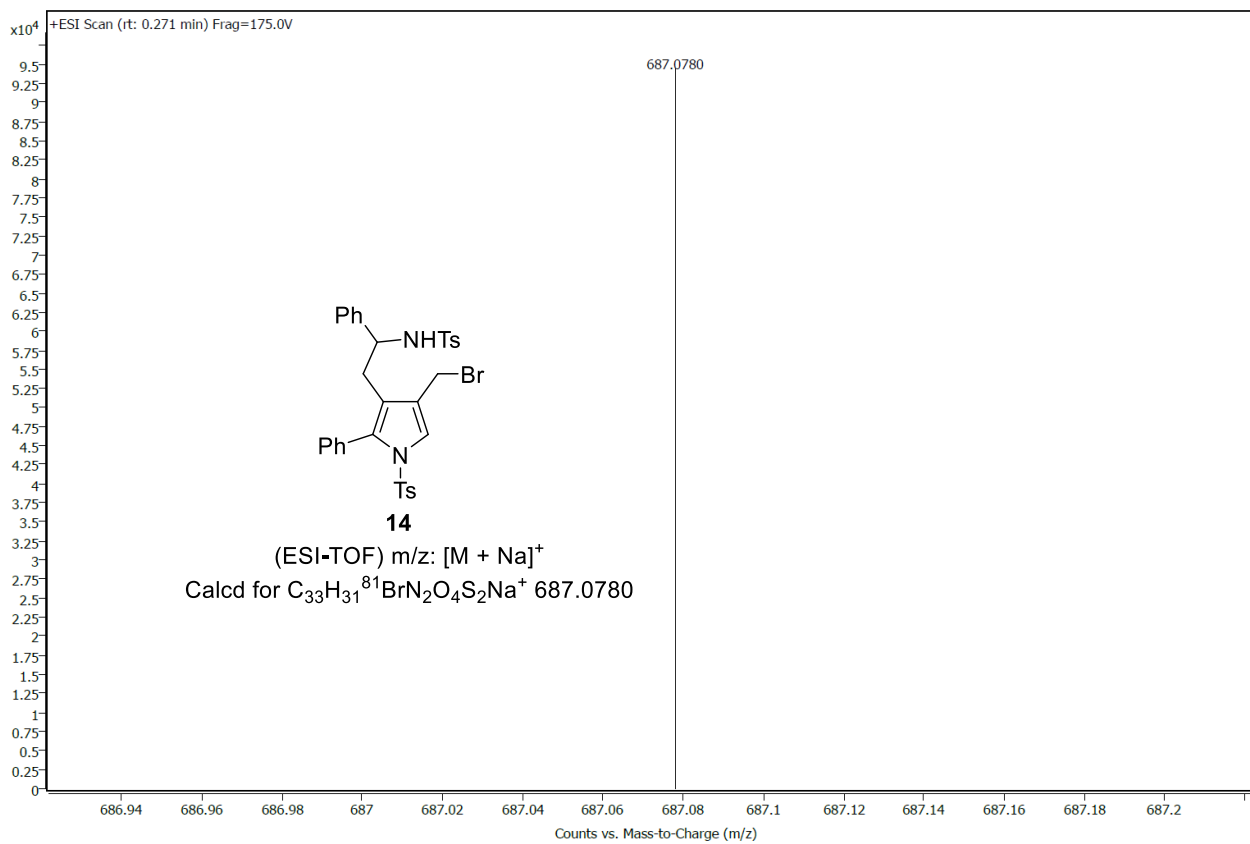



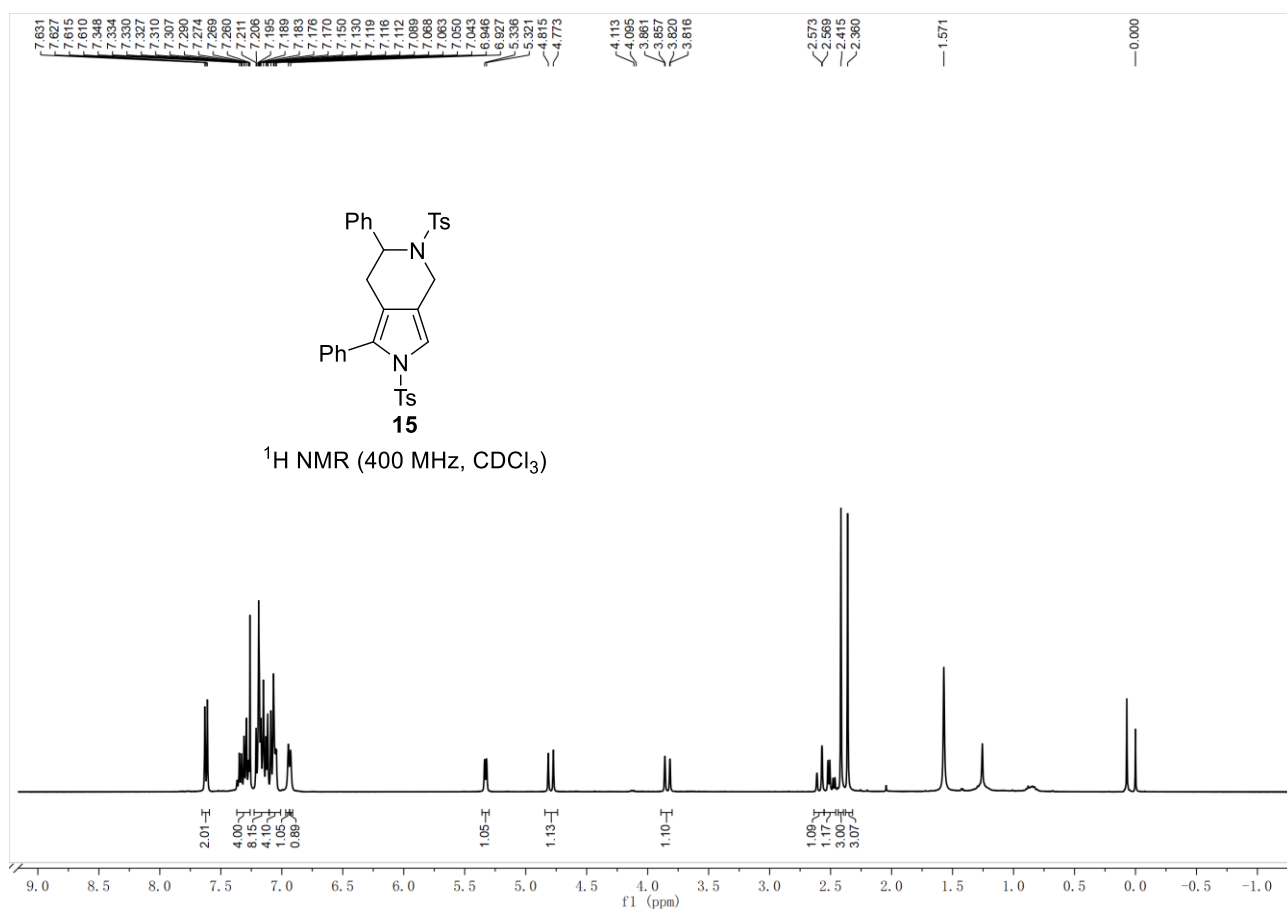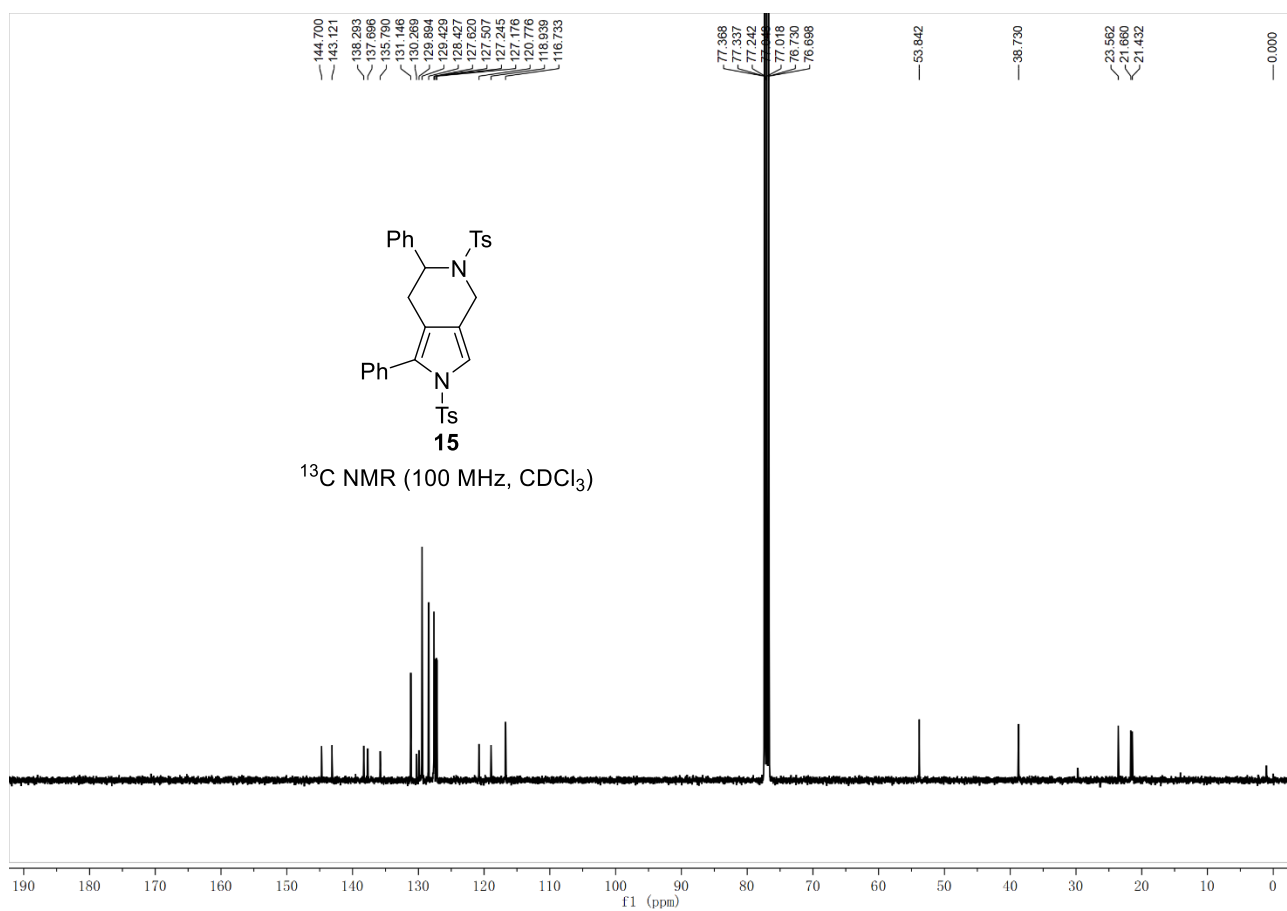

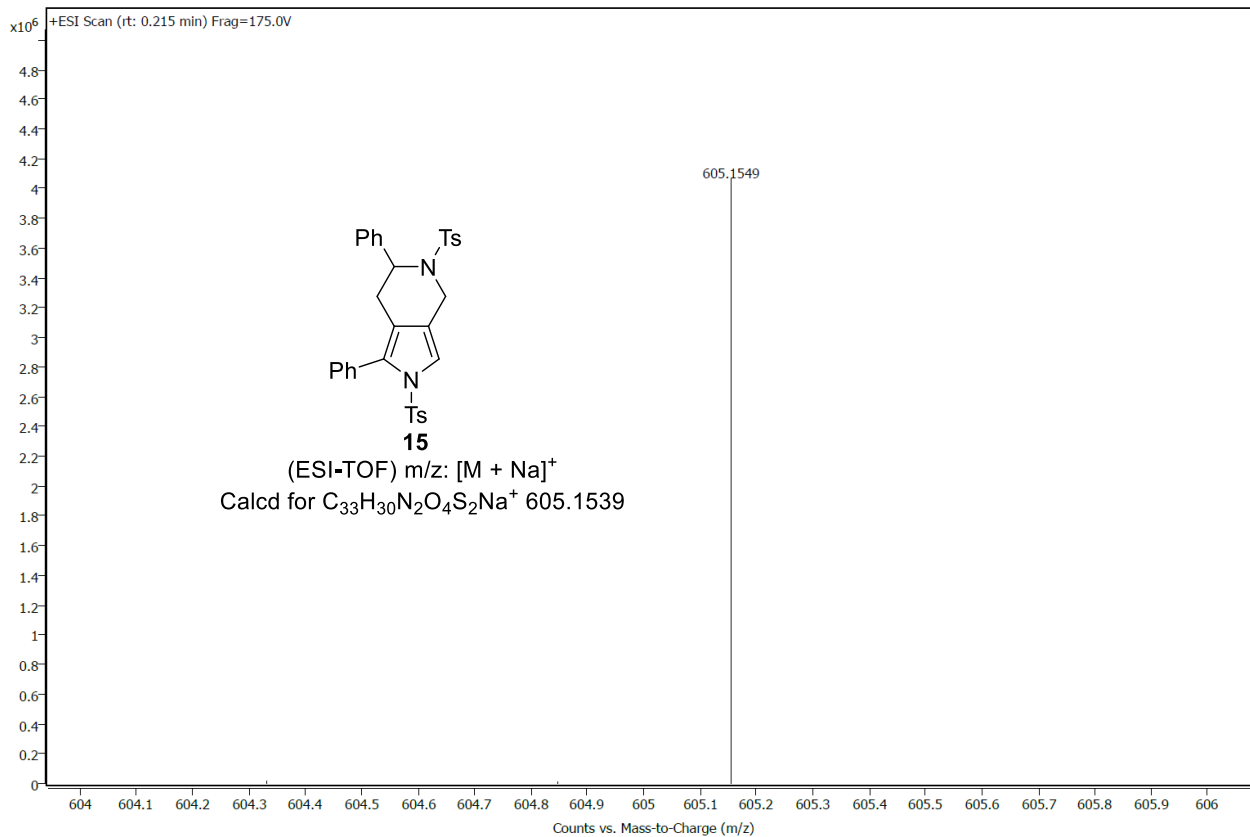

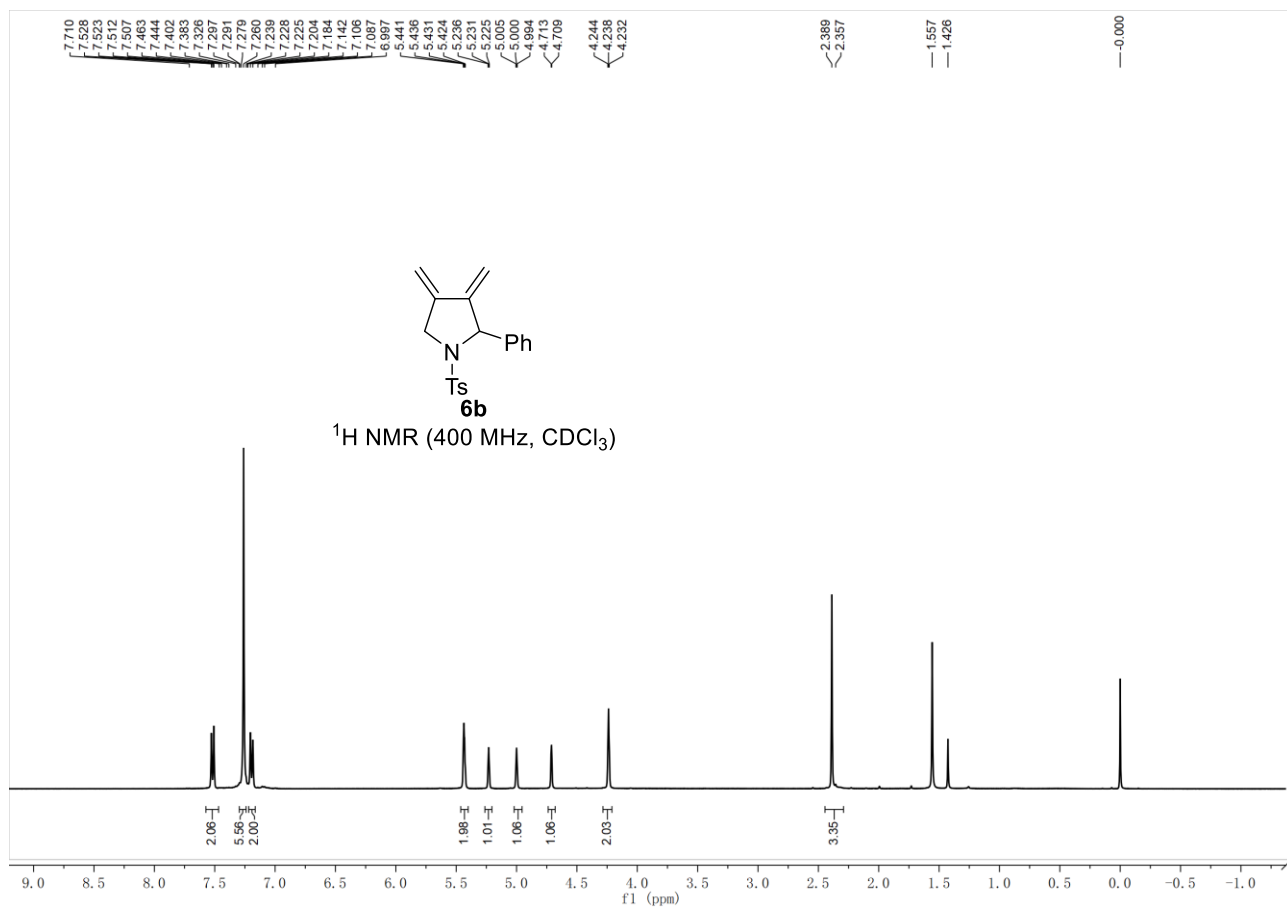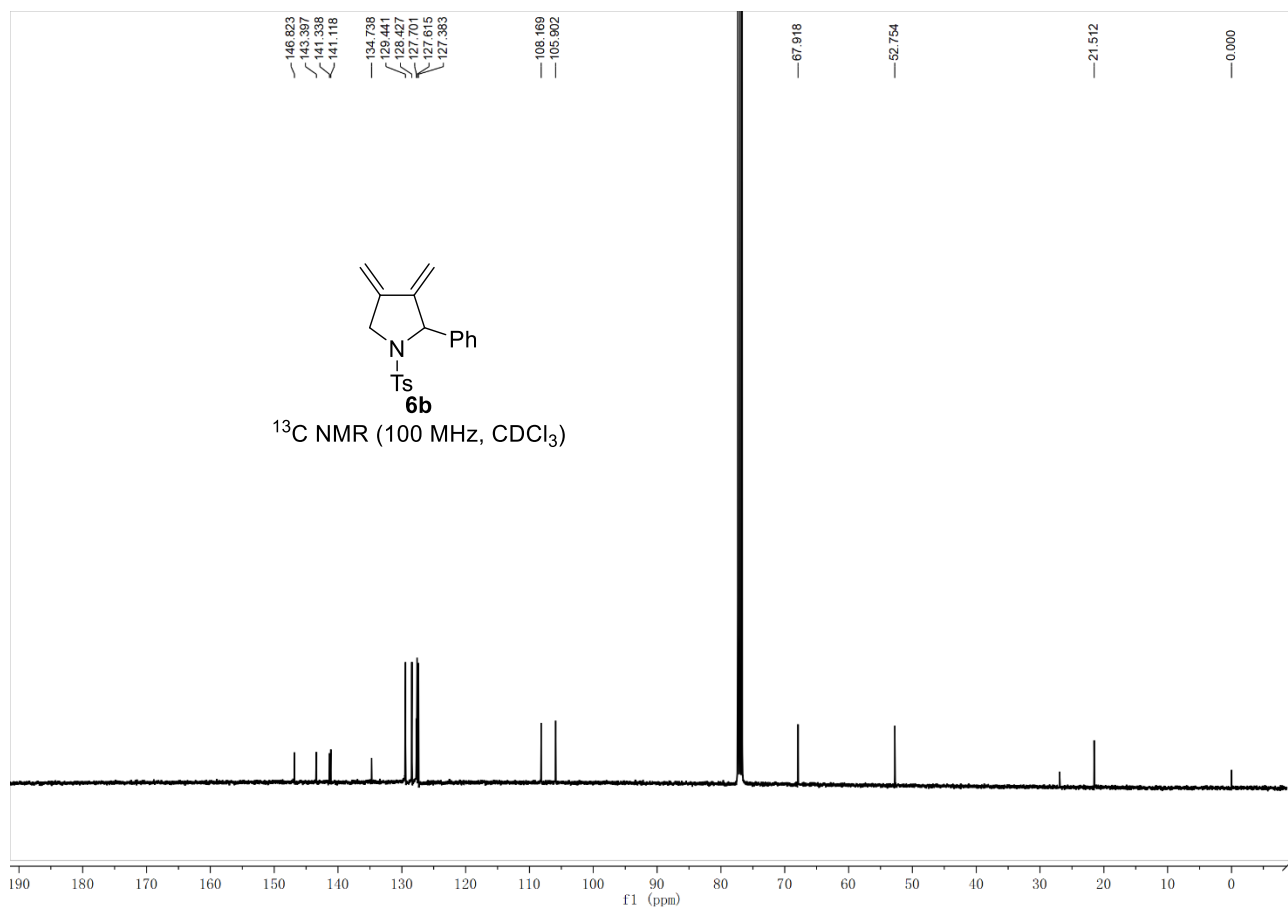

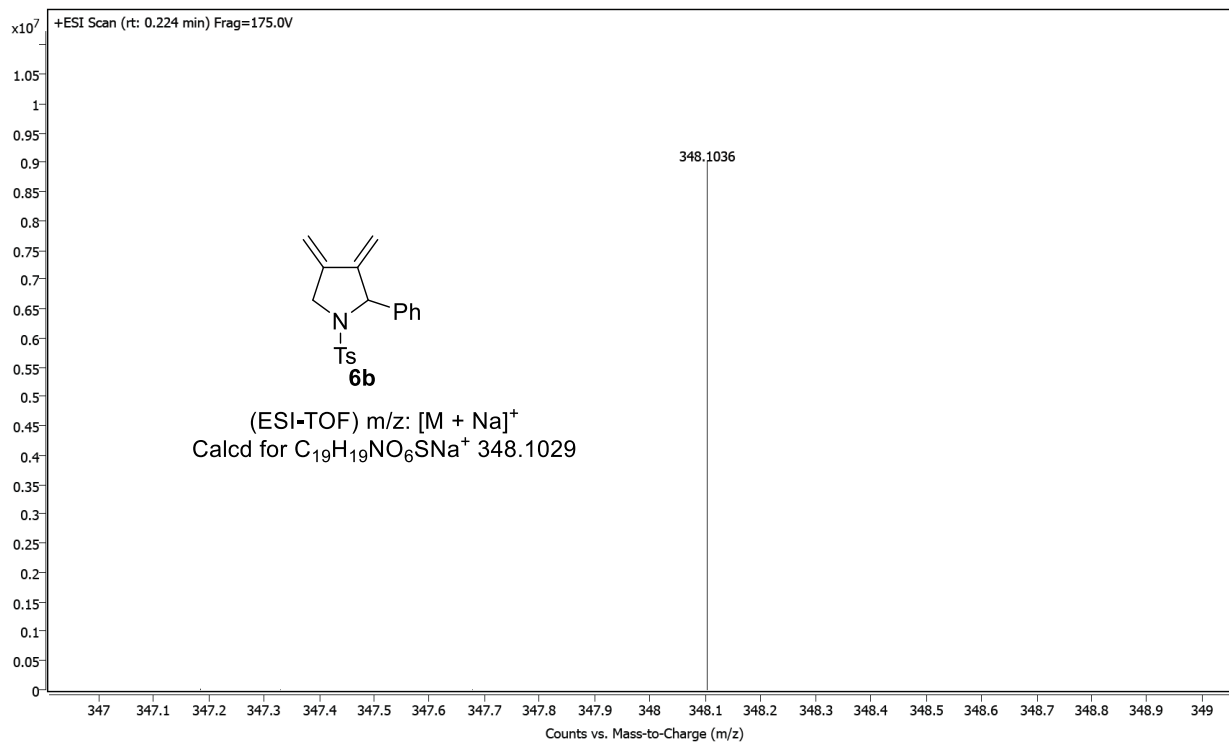

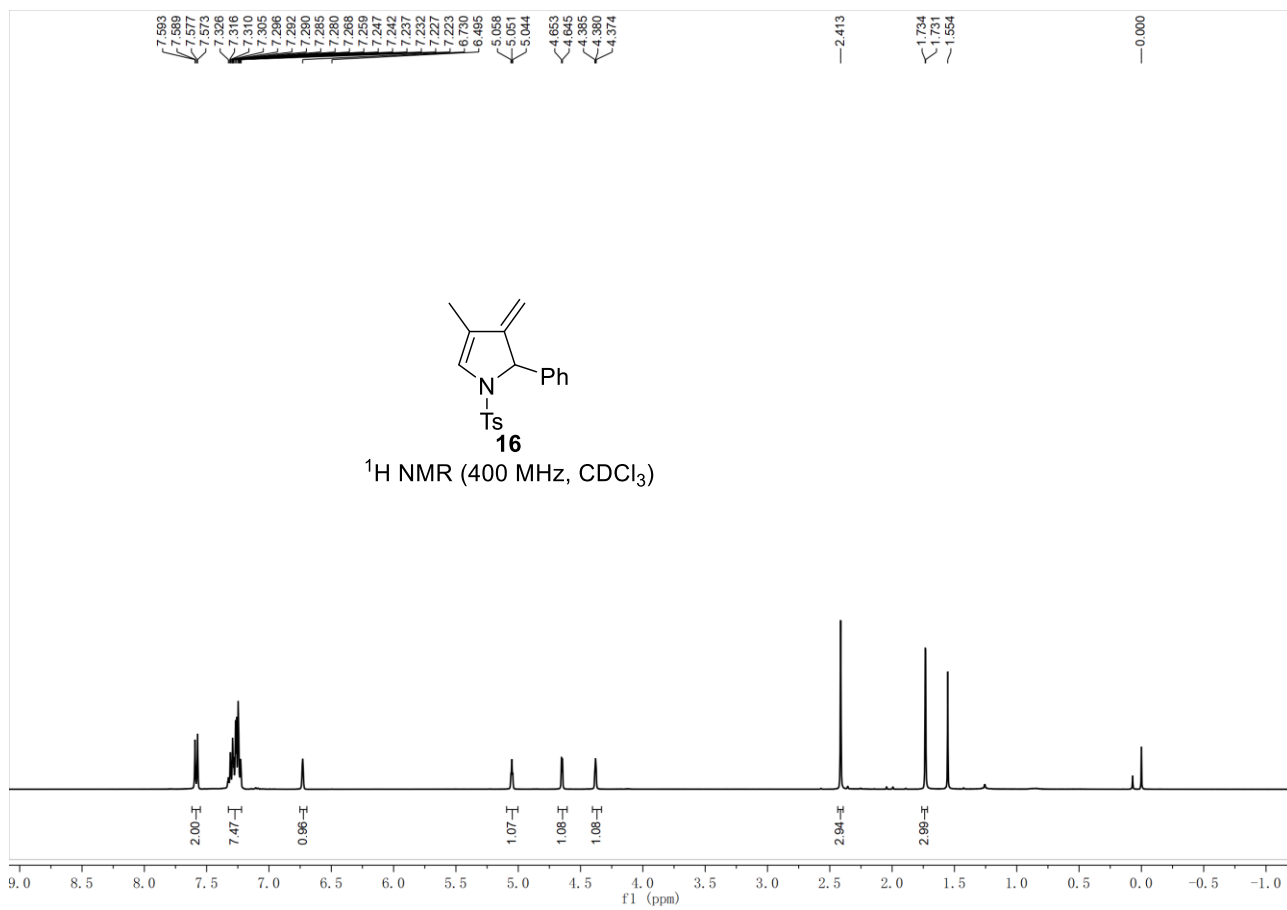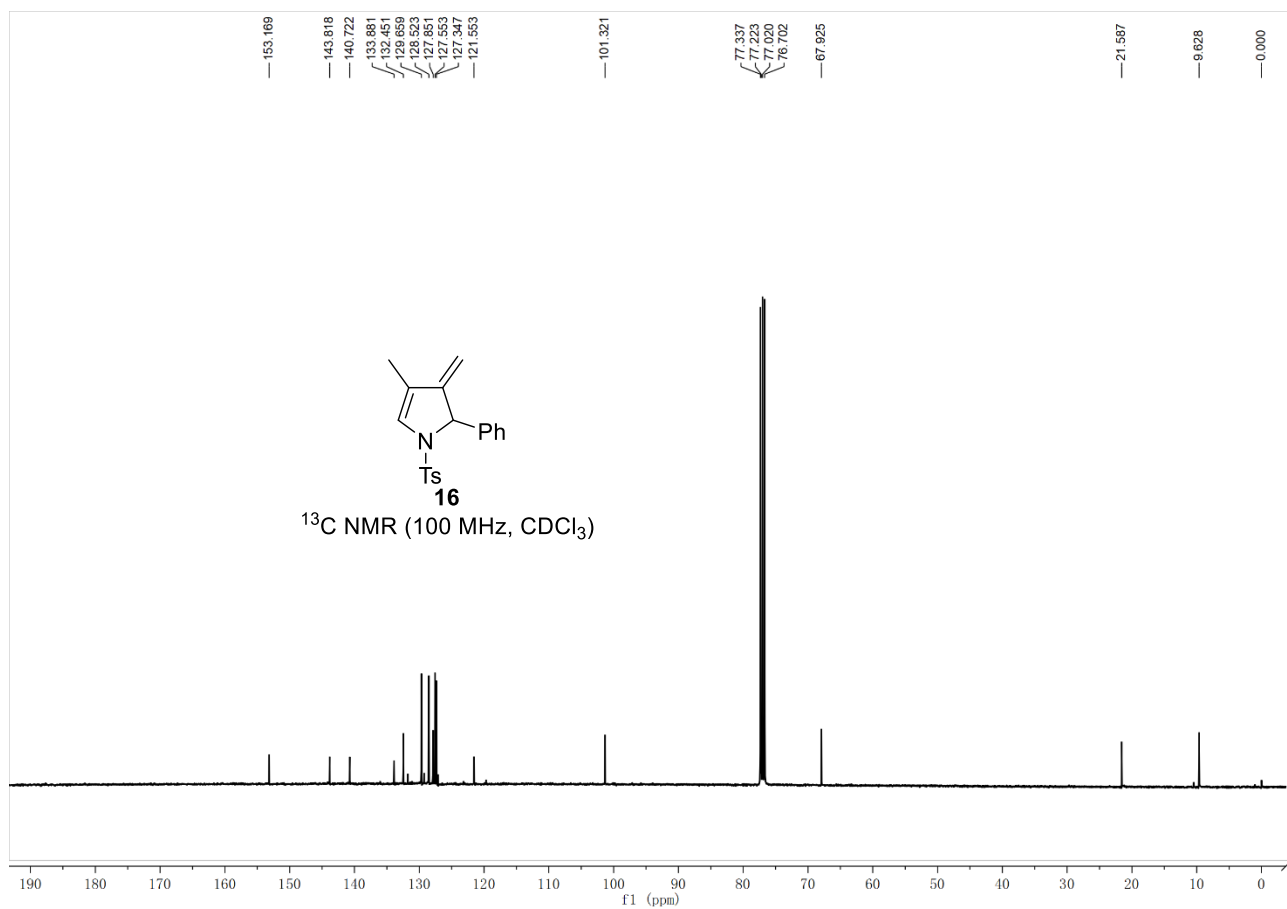

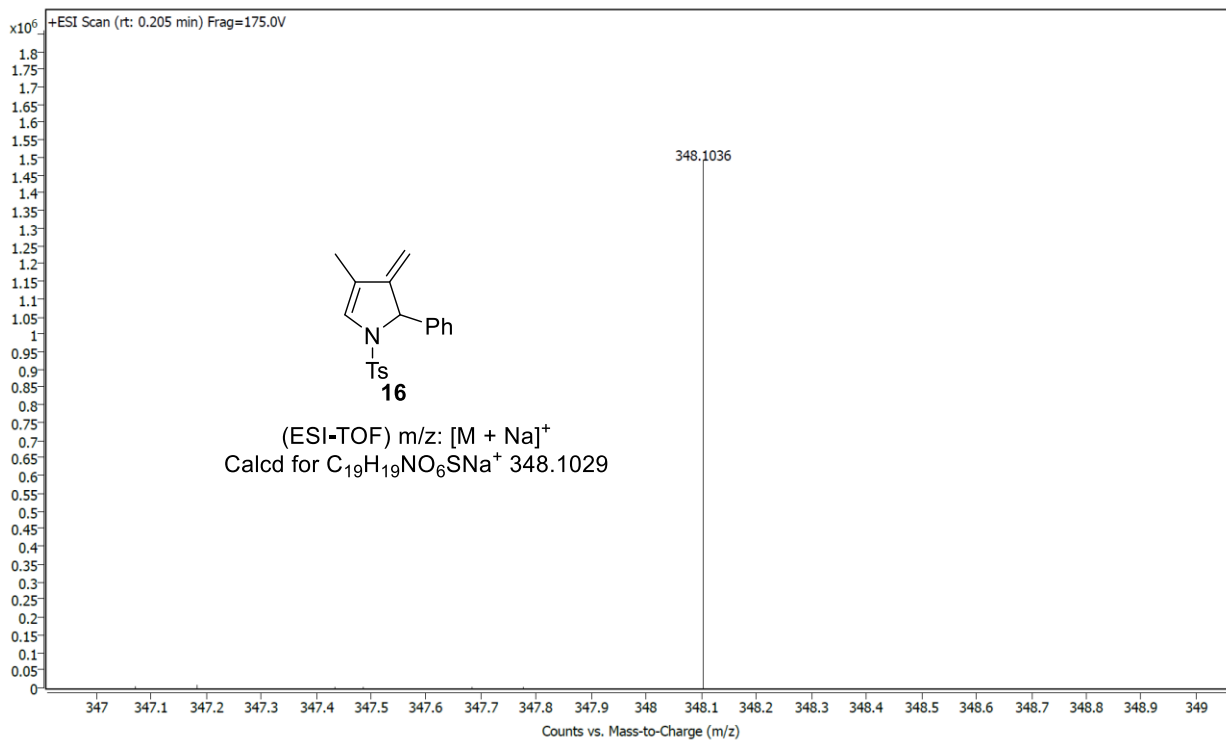

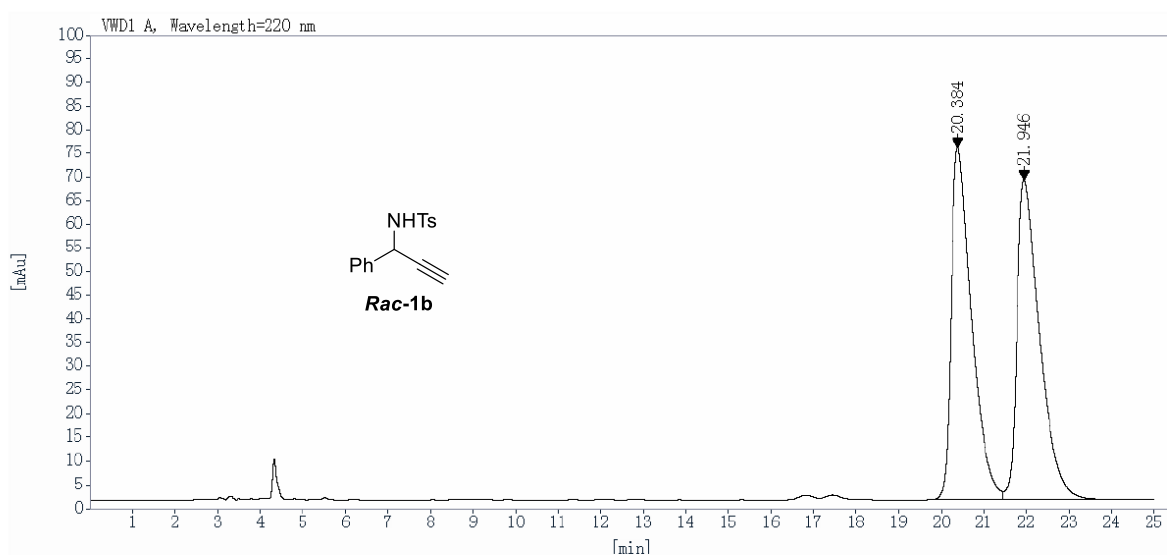

| Ret Time [min] | Peak Type | Width [min] | Height [mAU] | Area [mAU*s] | Area [%] |
|----------------|-----------|-------------|--------------|--------------|----------|
| 20.384         | BV        | 0.49        | 410.7130     | 13615.7227   | 49.8288  |
| 21.946         | VBA       | 0.54        | 373.1350     | 13709.2813   | 50.1712  |
| Totals:        |           |             |              | 27325.0039   | 100.0000 |

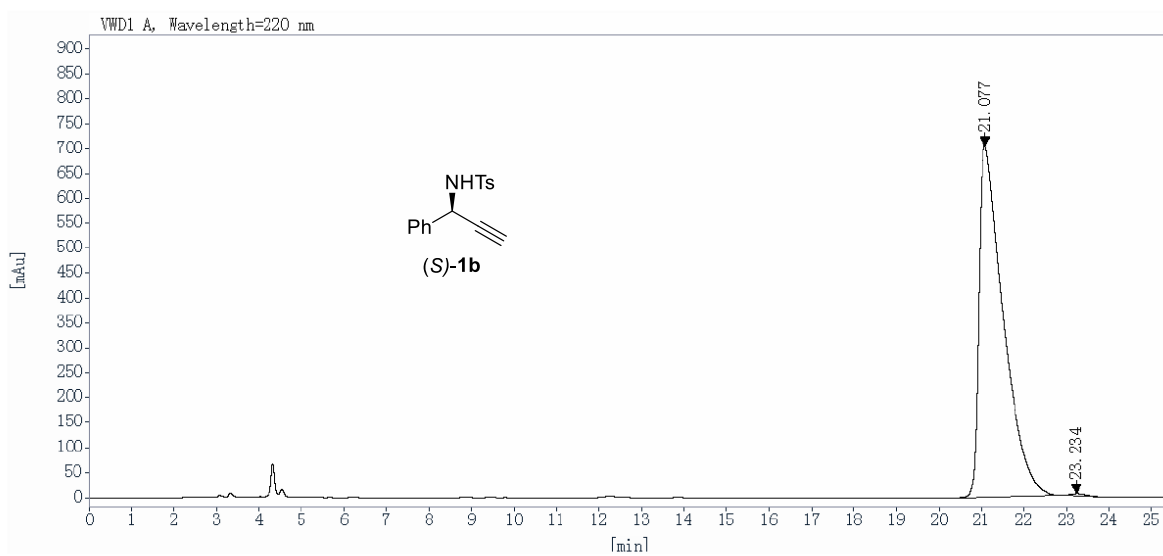

| Ret Time [min] | Peak Type | Width [min] | Height [mAU] | Area [mAU*s] | Area [%] |
|----------------|-----------|-------------|--------------|--------------|----------|
| 21.077         | BBA       | 0.58        | 703.4344     | 27920.5313   | 99.5732  |
| 23.234         | BBA       | 0.41        | 4.5840       | 119.6806     | 0.4268   |
| Totals:        |           |             |              | 28040.2118   | 100.0000 |

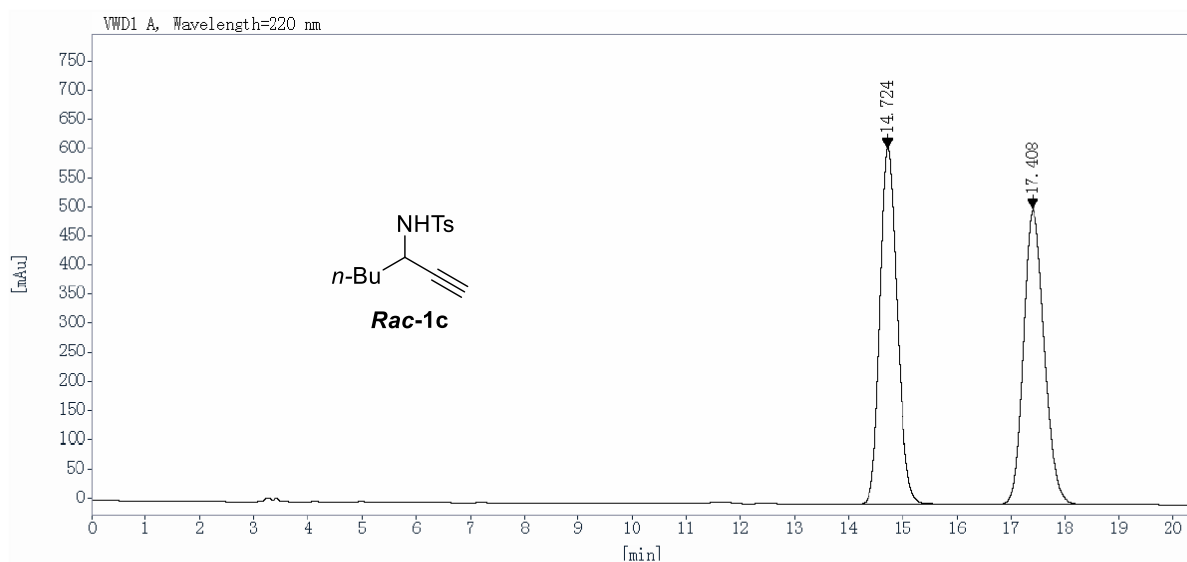

| Ret Time [min] | Peak Type | Width [min] | Height [mAU] | Area [mAU*s] | Area [%] |
|----------------|-----------|-------------|--------------|--------------|----------|
| 14.724         | BB        | 0.34        | 611.7380     | 13476.1807   | 49.9546  |
| 17.408         | BBA       | 0.41        | 506.6285     | 13500.6982   | 50.0454  |
| Totals:        |           |             |              | 26976.8789   | 100.0000 |

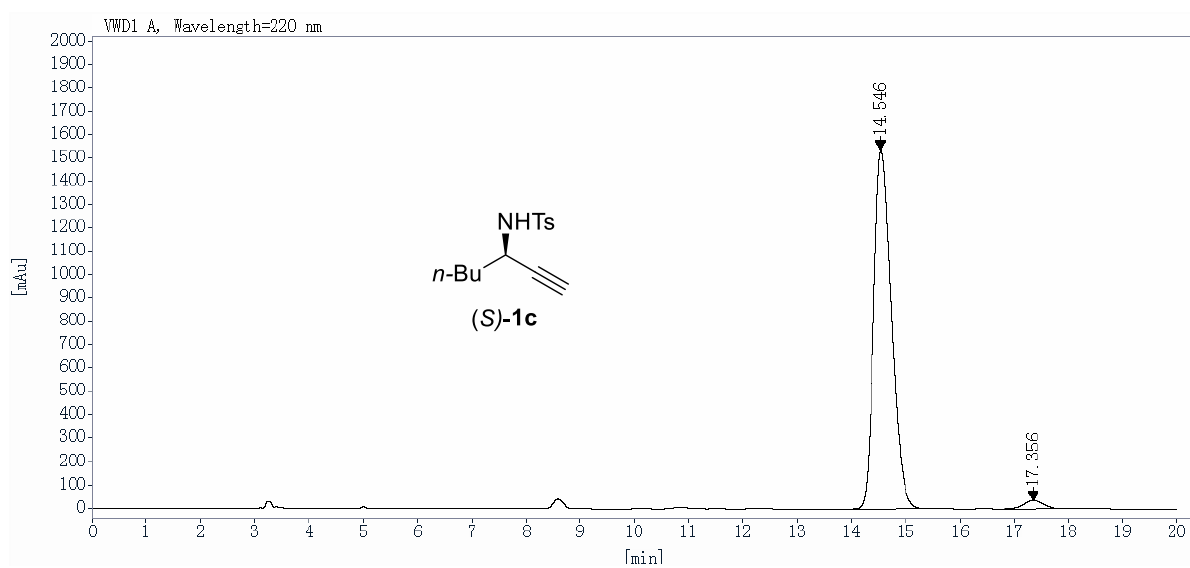

| Ret Time [min] | Peak Type | Width [min] | Height [mAU] | Area [mAU*s] | Area [%] |
|----------------|-----------|-------------|--------------|--------------|----------|
| 14.546         | BBA       | 0.35        | 1531.5427    | 34613.7383   | 97.3773  |
| 17.356         | BB        | 0.40        | 36.3731      | 932.2530     | 2.6227   |
| Totals:        |           |             |              | 35545.9913   | 100.0000 |



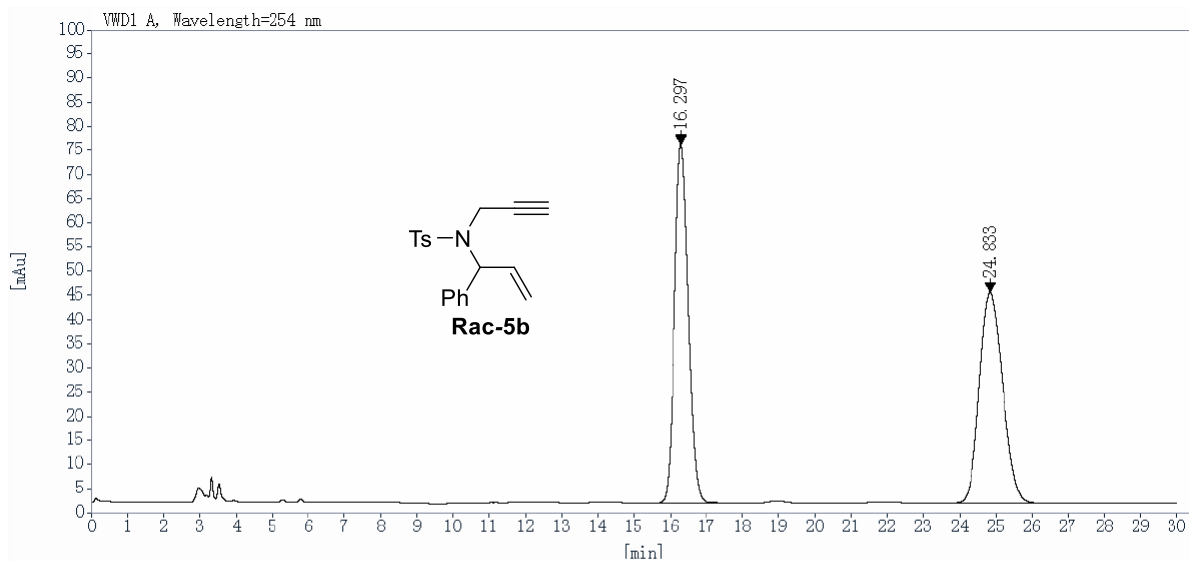

| Ret Time [min] | Peak Type | Width [min] | Height [mAU] | Area [mAU*s] | Area [%] |
|----------------|-----------|-------------|--------------|--------------|----------|
| 16.297         | BBA       | 0.41        | 55.6605      | 1454.3594    | 49.9389  |
| 24.833         | BBA       | 0.70        | 32.6445      | 1457.9210    | 50.0611  |
| Totals:        |           |             |              | 2912.2804    | 100.0000 |

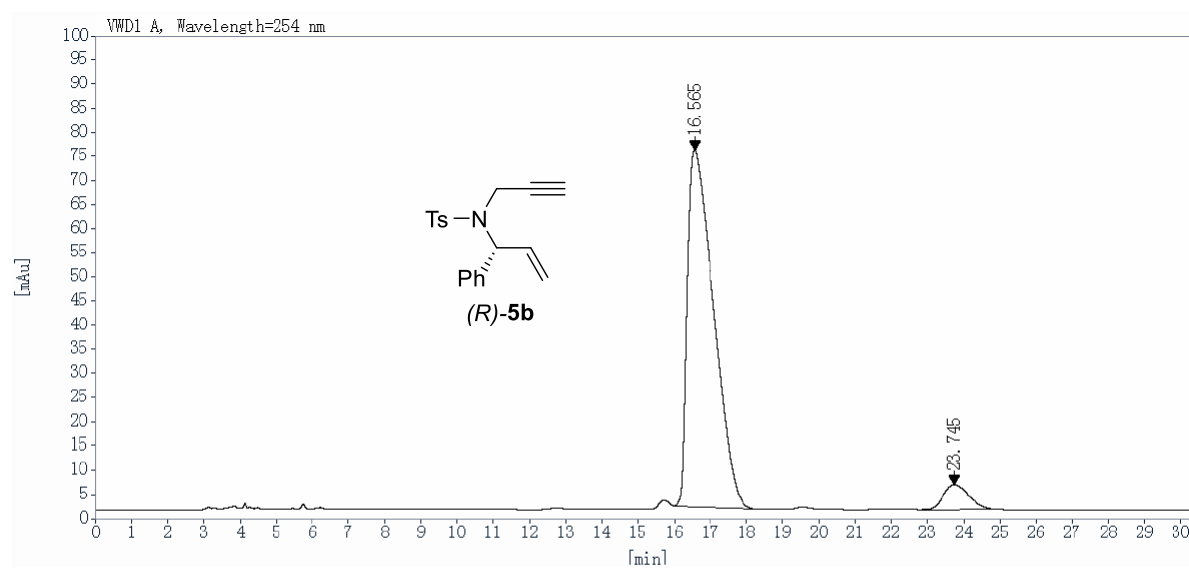

| Ret Time [min] | Peak Type | Width [min] | Height [mAU] | Area [mAU*s] | Area [%] |
|----------------|-----------|-------------|--------------|--------------|----------|
| 16.565         | BBA       | 0.81        | 984.4285     | 49063.5547   | 93.5542  |
| 23.745         | BBA       | 0.78        | 68.7986      | 3380.4258    | 6.4458   |
| Totals:        |           |             |              | 52443.9805   | 100.0000 |

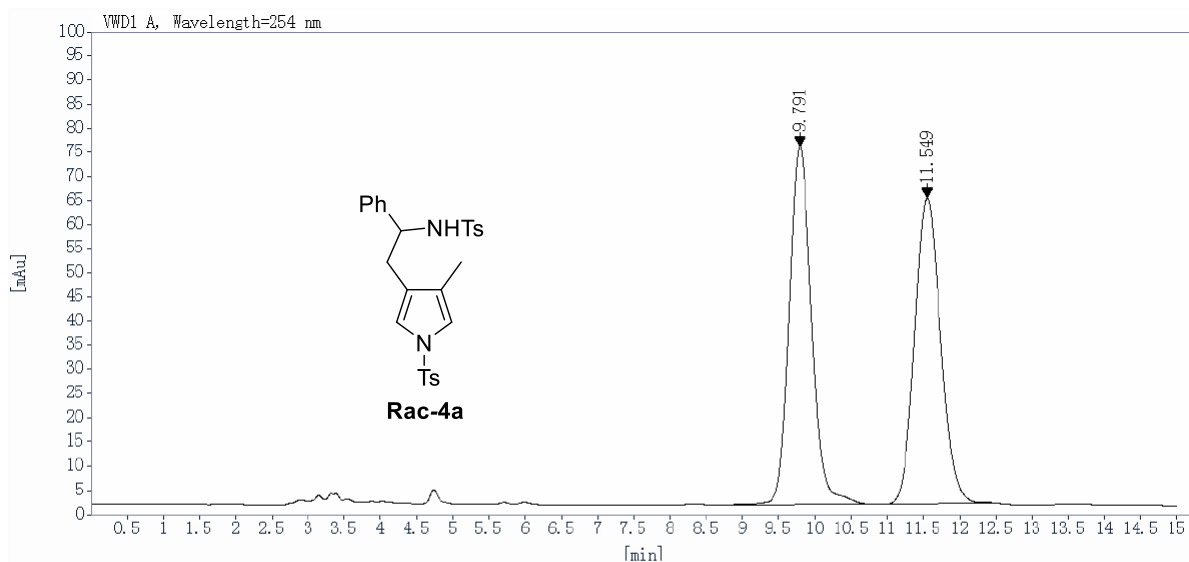

| Ret Time [min] | Peak Type | Width [min] | Height [mAU] | Area [mAU*s] | Area [%] |
|----------------|-----------|-------------|--------------|--------------|----------|
| 9.791          | BBA       | 0.33        | 132.7070     | 2838.5107    | 50.0555  |
| 11.549         | BBA       | 0.39        | 113.2538     | 2832.2109    | 49.9445  |
| Totals:        |           |             |              | 5670.7217    | 100.0000 |

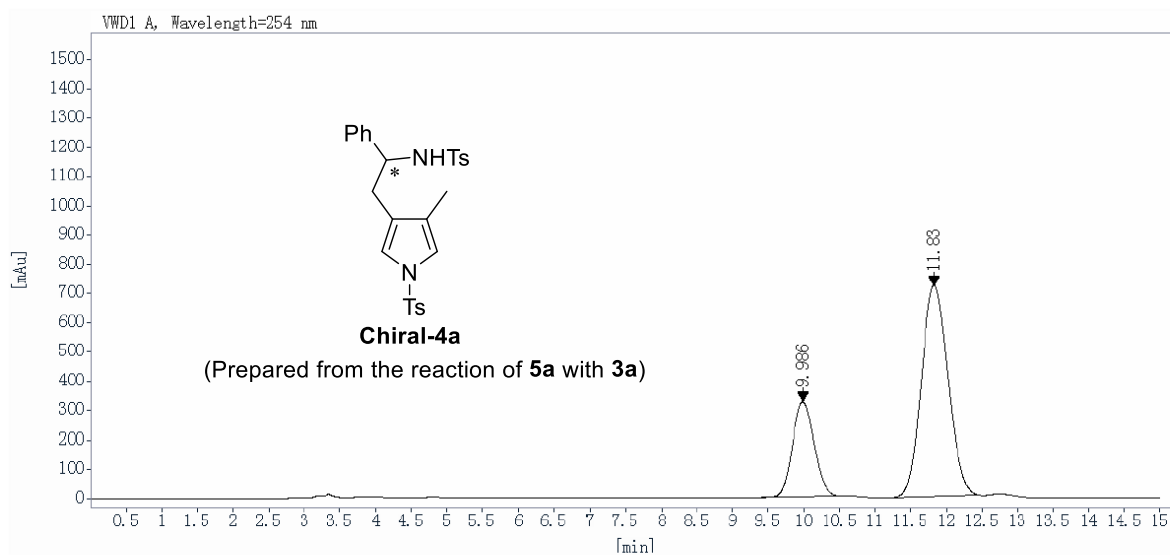

| Ret Time [min] | Peak Type | Width [min] | Height [mAU] | Area [mAU*s] | Area [%] |
|----------------|-----------|-------------|--------------|--------------|----------|
| 9.986          | BBA       | 0.33        | 323.2359     | 6849.2271    | 26.6323  |
| 11.830         | BBA       | 0.41        | 721.5989     | 18868.4961   | 73.3677  |
| Totals:        |           |             |              | 25717.7231   | 100.0000 |

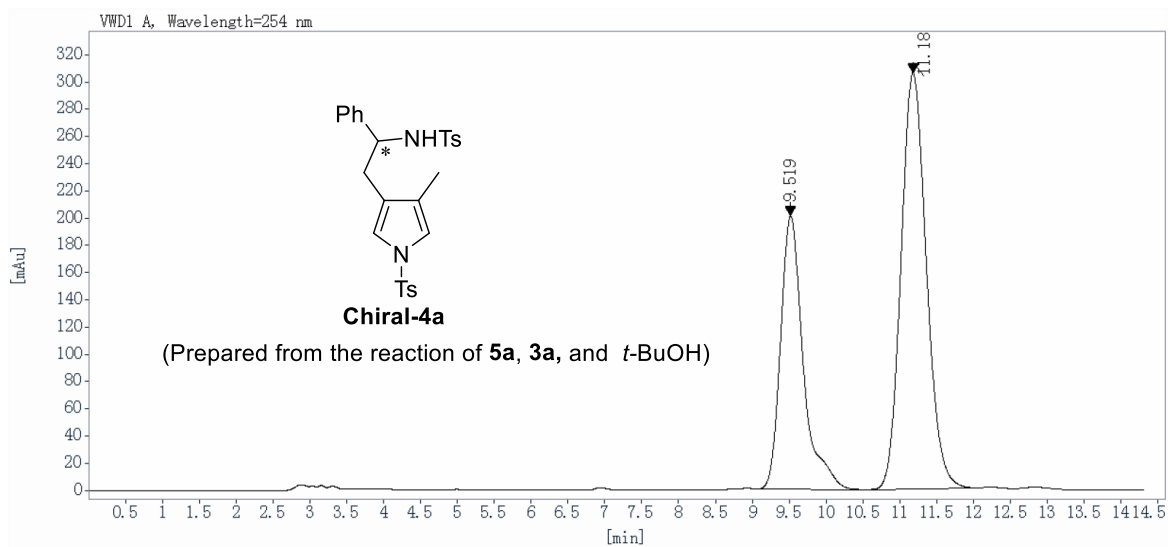

| Ret Time [min] | Peak Type | Width [min] | Height [mAU] | Area [mAU*s] | Area [%] |
|----------------|-----------|-------------|--------------|--------------|----------|
| 9.519          | BB        | 0.32        | 200.5821     | 4283.0273    | 37.0362  |
| 11.180         | BB        | 0.37        | 305.6908     | 7281.3979    | 62.9638  |
| Totals:        |           |             |              | 11564.4253   | 100.0000 |

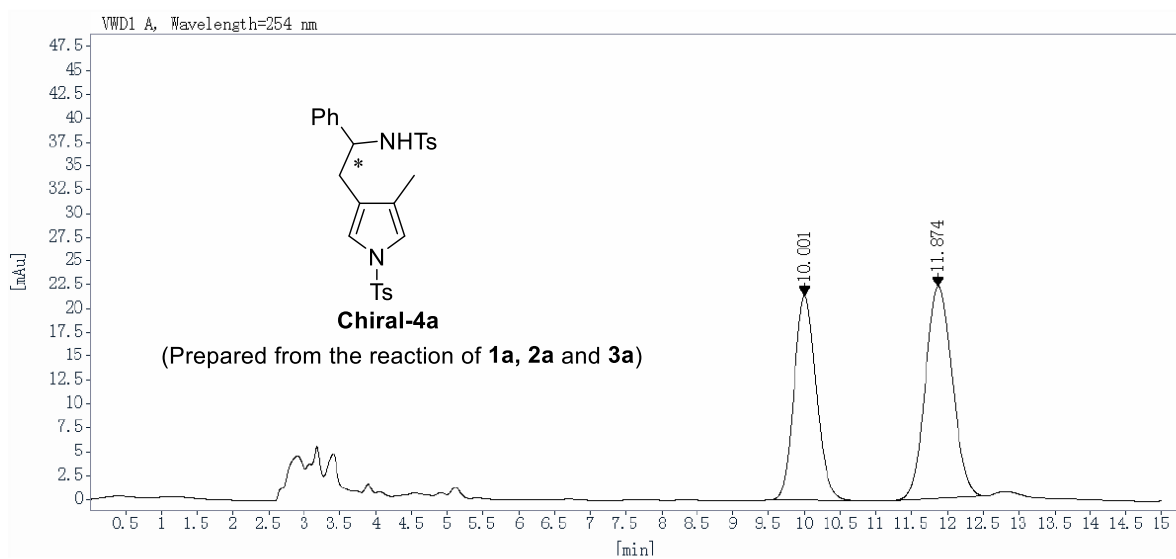

| Ret Time [min] | Peak Type | Width [min] | Height [mAU] | Area [mAU*s] | Area [%] |
|----------------|-----------|-------------|--------------|--------------|----------|
| 10.001         | BBA       | 0.34        | 21.3849      | 464.2442     | 44.4765  |
| 11.874         | BB        | 0.41        | 22.1611      | 579.5522     | 55.5235  |
| Totals:        |           |             |              | 1043.7964    | 100.0000 |

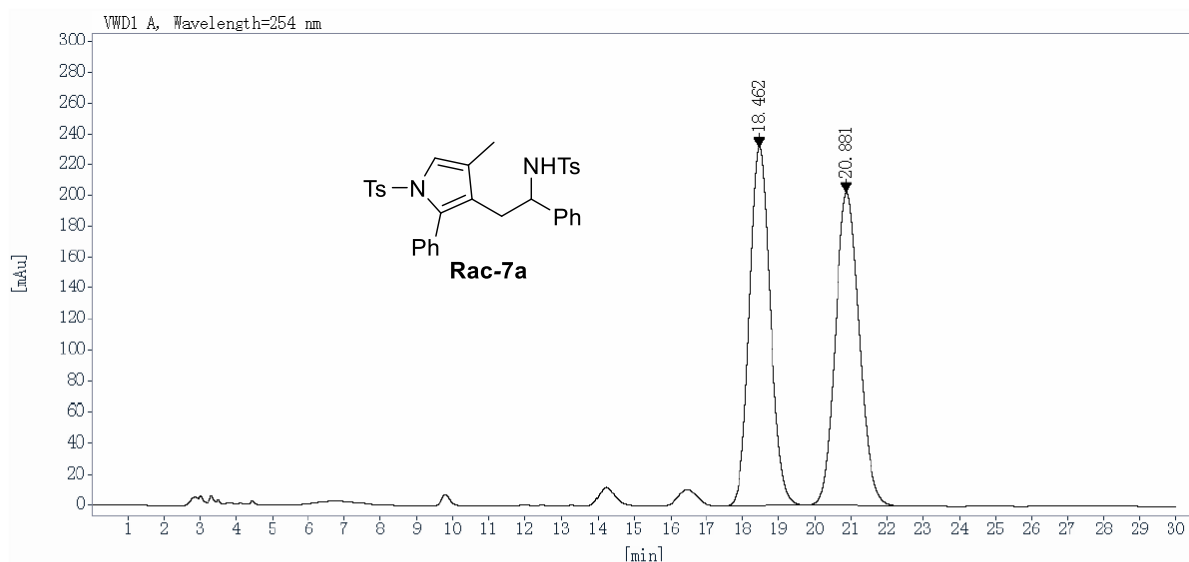

| Ret Time [min] | Peak Type | Width [min] | Height [mAU] | Area [mAU*s] | Area [%] |
|----------------|-----------|-------------|--------------|--------------|----------|
| 18.462         | BB        | 0.62        | 231.6297     | 9252.9609    | 49.9753  |
| 20.881         | BB        | 0.71        | 201.8466     | 9262.1123    | 50.0247  |
| Totals:        |           |             |              | 18515.0732   | 100.0000 |

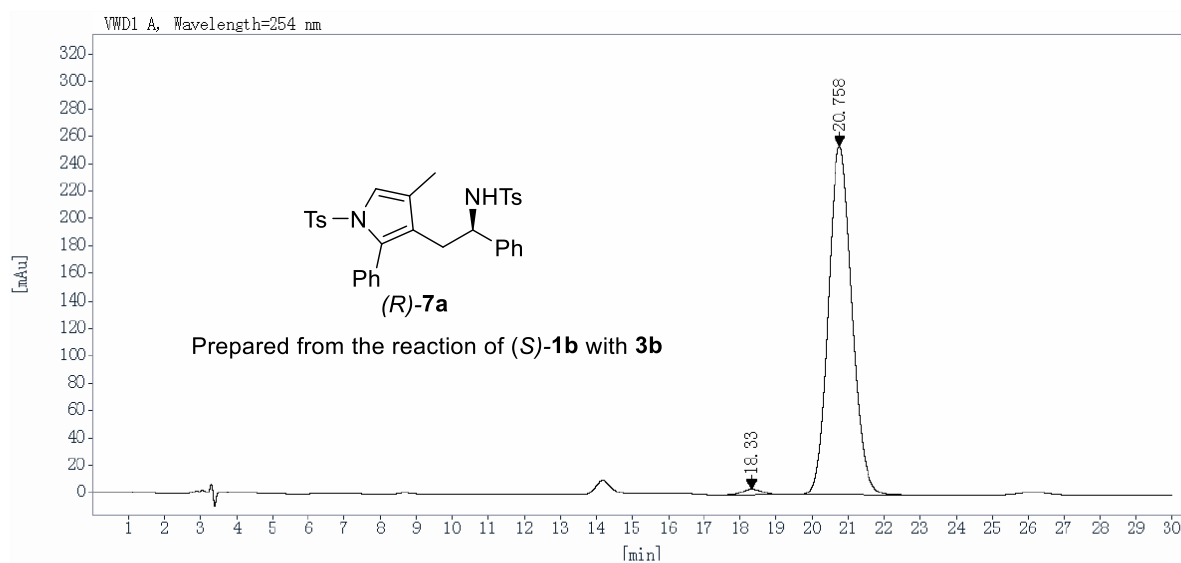

| Ret Time [min] | Peak Type | Width [min] | Height [mAU] | Area [mAU*s] | Area [%] |
|----------------|-----------|-------------|--------------|--------------|----------|
| 18.330         | BB        | 0.59        | 4.4236       | 170.3662     | 1.4507   |
| 20.758         | BB        | 0.71        | 254.5995     | 11573.5928   | 98.5493  |
| Totals:        |           |             |              | 11743.9590   | 100.0000 |

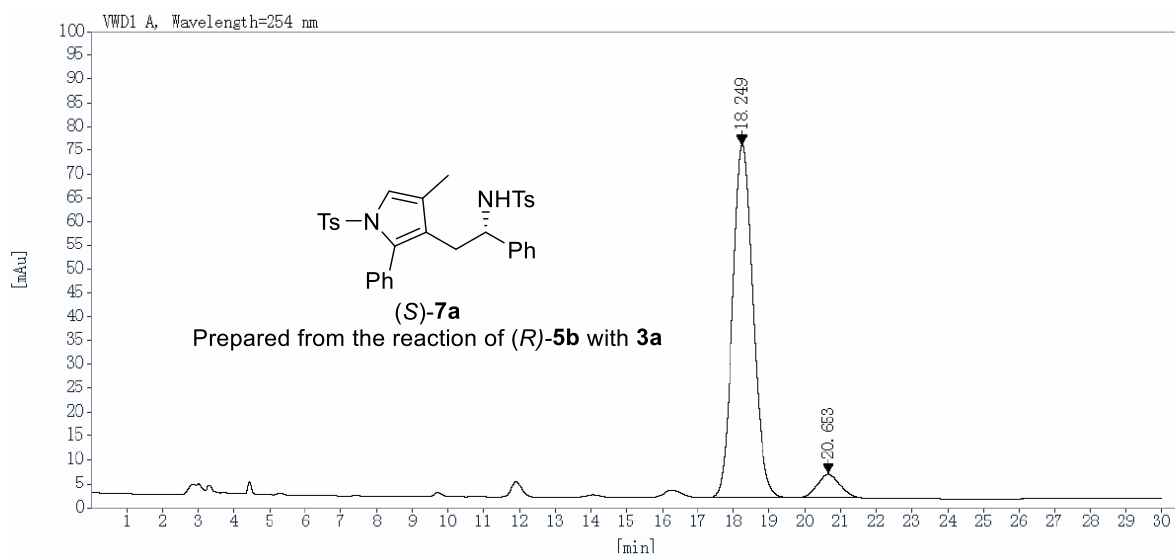

| Ret Time [min] | Peak Type | Width [min] | Height [mAU] | Area [mAU*s] | Area [%] |
|----------------|-----------|-------------|--------------|--------------|----------|
| 18.249         | BBA       | 0.61        | 40.1458      | 1584.7935    | 93.2275  |
| 20.653         | BBA       | 0.64        | 2.6916       | 115.1271     | 6.7725   |
| Totals:        |           |             |              | 1699.9205    | 100.0000 |

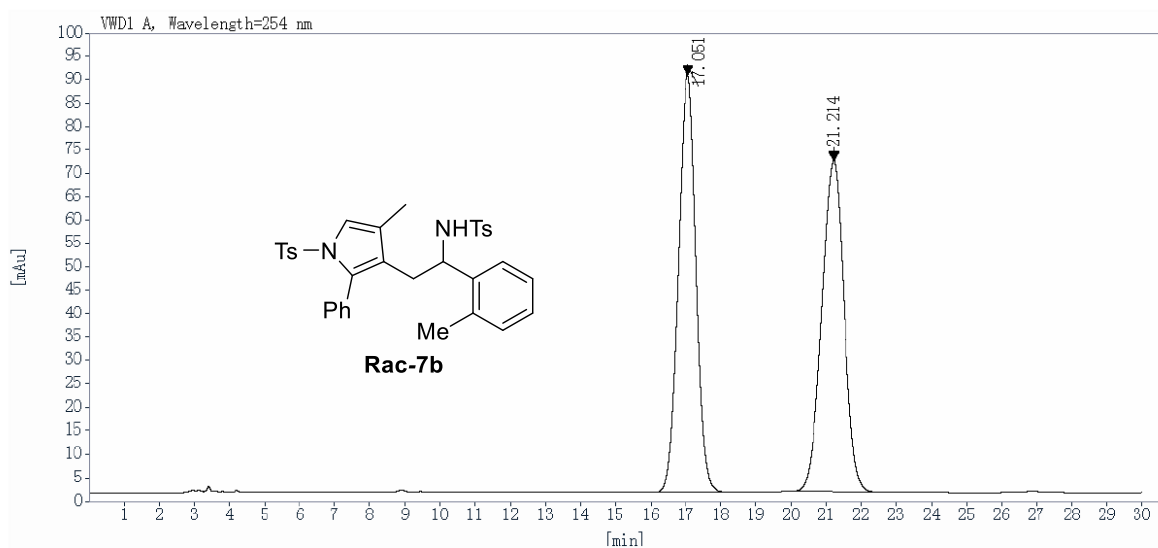

| Ret Time [min] | Peak Type | Width [min] | Height [mAU] | Area [mAU*s] | Area [%] |
|----------------|-----------|-------------|--------------|--------------|----------|
| 17.051         | BB        | 0.54        | 819.1260     | 28545.9863   | 50.0740  |
| 21.214         | BB        | 0.68        | 649.0676     | 28461.5820   | 49.9260  |
| Totals:        |           |             |              | 57007.5684   | 100.0000 |

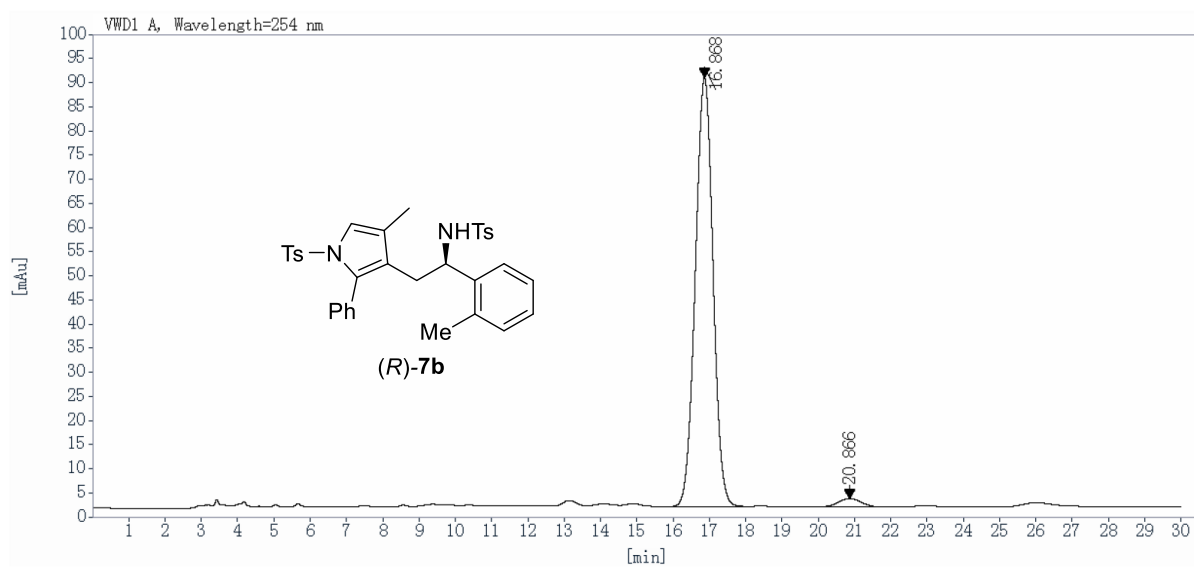

| Ret Time [min] | Peak Type | Width [min] | Height [mAU] | Area [mAU*s] | Area [%] |
|----------------|-----------|-------------|--------------|--------------|----------|
| 16.868         | BB        | 0.53        | 733.2902     | 24794.3203   | 97.7492  |
| 20.866         | BBA       | 0.65        | 13.8482      | 570.9182     | 2.2508   |
| Totals:        |           |             |              | 25365.2385   | 100.0000 |

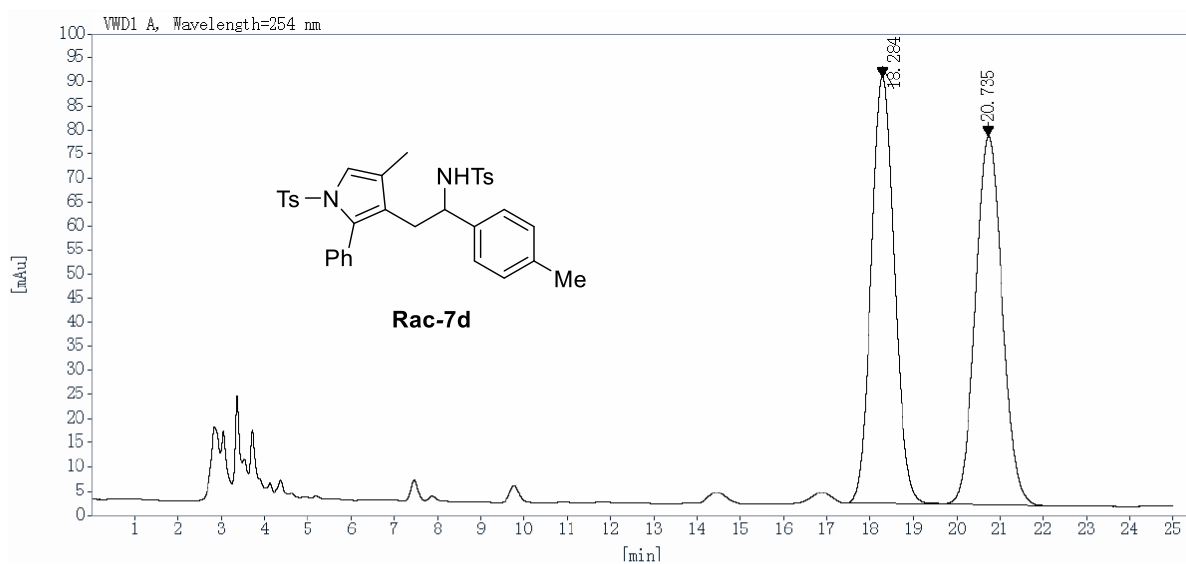

| Ret Time [min] | Peak Type | Width [min] | Height [mAU] | Area [mAU*s] | Area [%] |
|----------------|-----------|-------------|--------------|--------------|----------|
| 18.284         | BB        | 0.58        | 26.2000      | 967.5932     | 49.9677  |
| 20.735         | BB        | 0.66        | 22.6299      | 968.8438     | 50.0323  |
| Totals:        |           |             |              | 1936.4370    | 100.0000 |

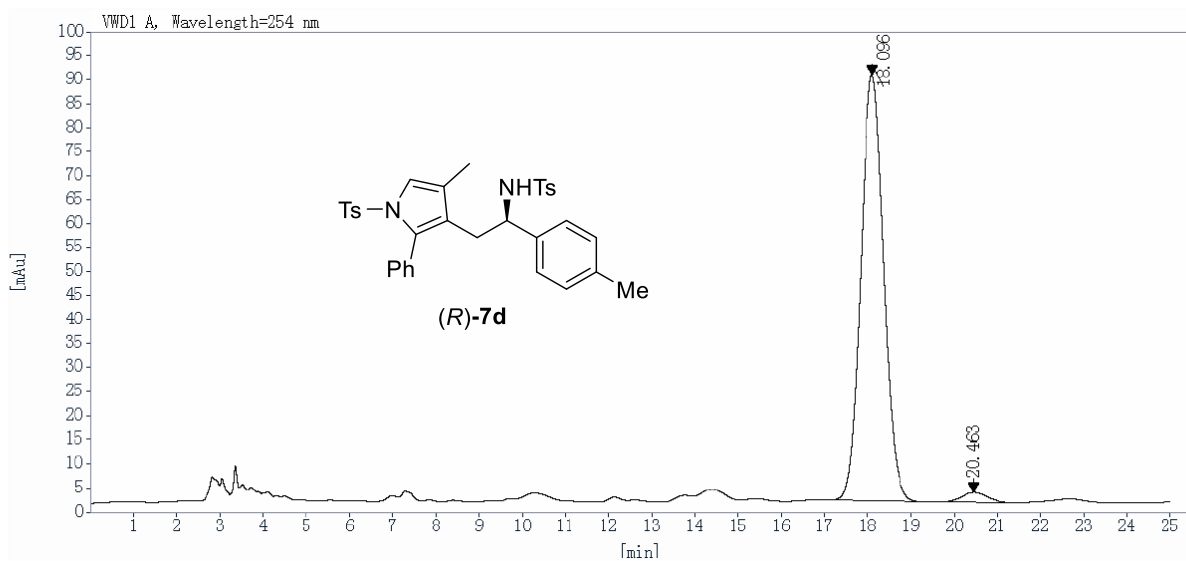

| Ret Time [min] | Peak Type | Width [min] | Height [mAU] | Area [mAU*s] | Area [%] |
|----------------|-----------|-------------|--------------|--------------|----------|
| 18.096         | BB        | 0.57        | 63.8802      | 2341.9404    | 97.4086  |
| 20.463         | BBA       | 0.66        | 1.4872       | 62.3047      | 2.5914   |
| Totals:        |           |             |              | 2404.2451    | 100.0000 |

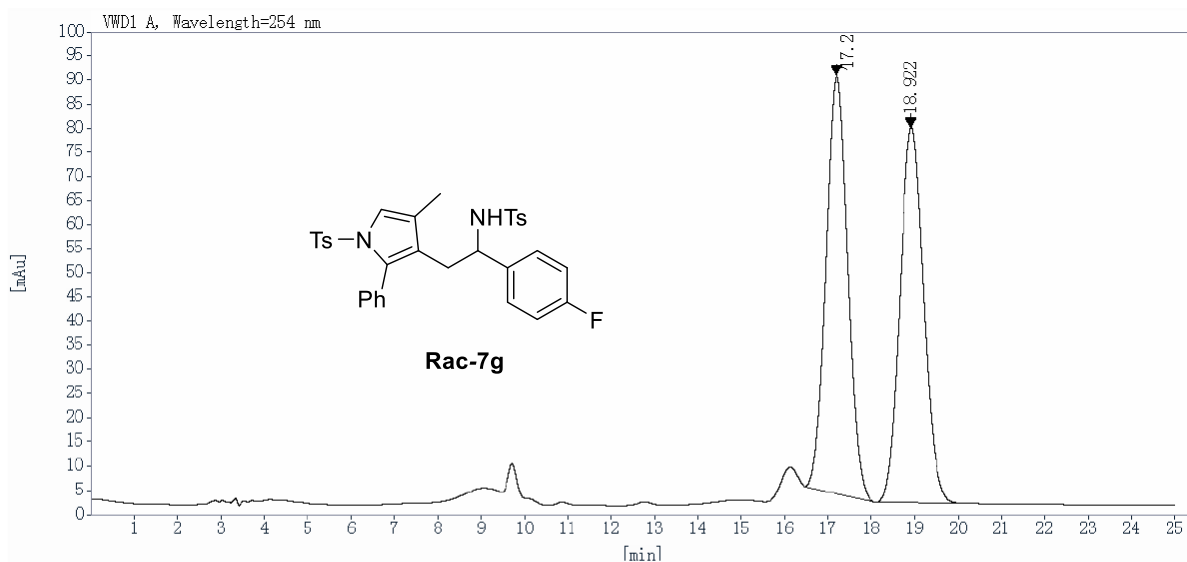

| Ret Time [min] | Peak Type | Width [min] | Height [mAU] | Area [mAU*s] | Area [%] |
|----------------|-----------|-------------|--------------|--------------|----------|
| 17.200         | BB        | 0.55        | 225.2283     | 7882.7695    | 50.7076  |
| 18.922         | BB        | 0.59        | 201.7345     | 7662.7690    | 49.2924  |
| Totals:        |           |             |              | 15545.5386   | 100.0000 |

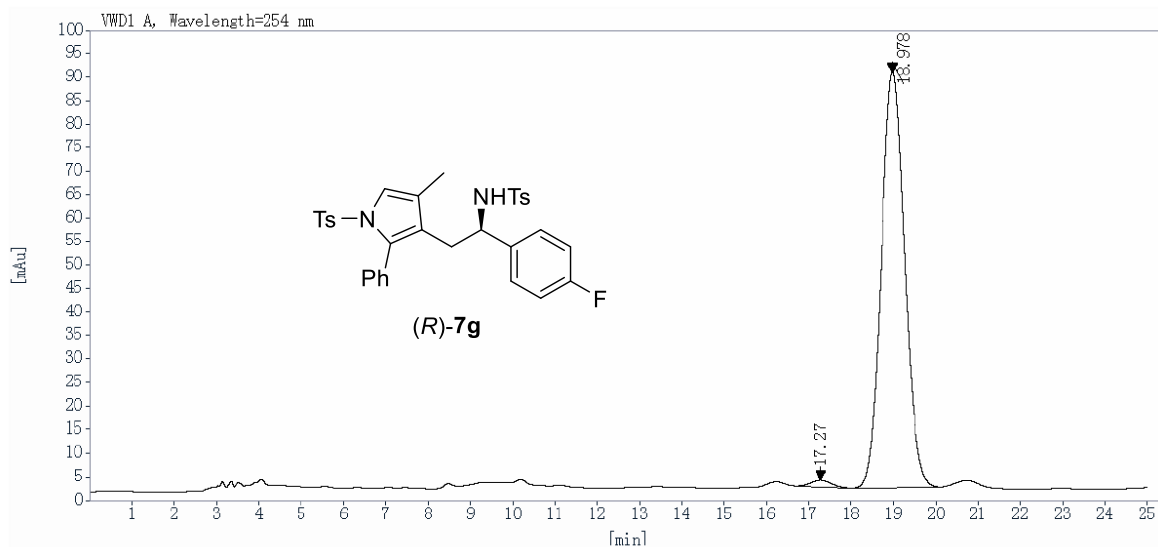

| Ret Time [min] | Peak Type | Width [min] | Height [mAU] | Area [mAU*s] | Area [%] |
|----------------|-----------|-------------|--------------|--------------|----------|
| 17.270         | BB        | 0.51        | 3.4593       | 114.2187     | 1.3739   |
| 18.978         | BB        | 0.60        | 213.5724     | 8198.9922    | 98.6261  |
| Totals:        |           |             |              | 8313.2109    | 100.0000 |



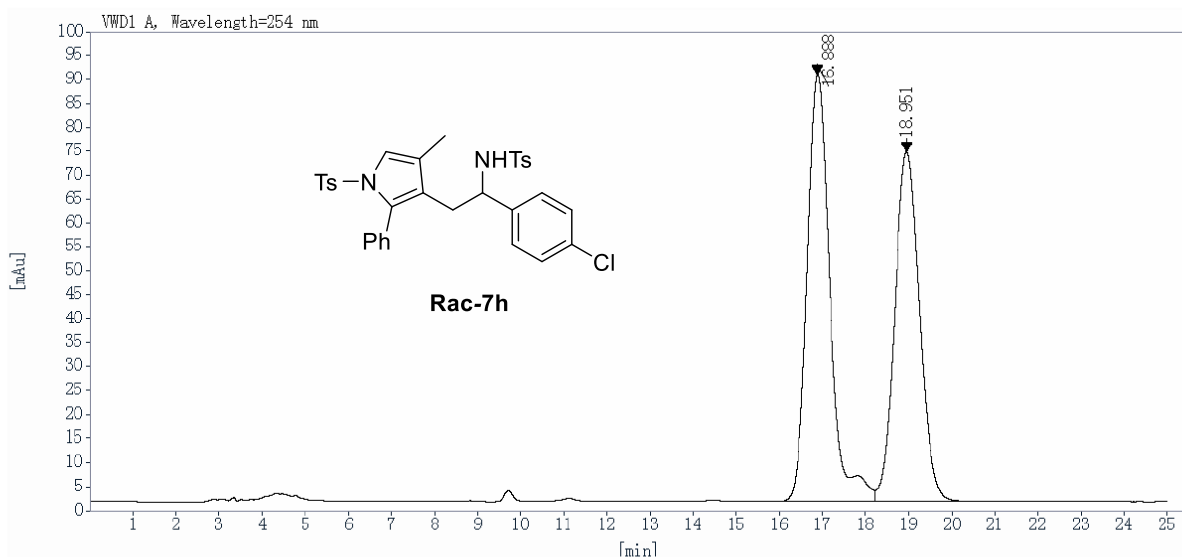

| Ret Time [min] | Peak Type | Width [min] | Height [mAU] | Area [mAU*s] | Area [%] |
|----------------|-----------|-------------|--------------|--------------|----------|
| 16.888         | BV R      | 0.54        | 204.0264     | 7477.3335    | 52.8772  |
| 18.951         | VB        | 0.62        | 166.9891     | 6663.6089    | 47.1228  |
| Totals:        |           |             |              | 14140.9424   | 100.0000 |

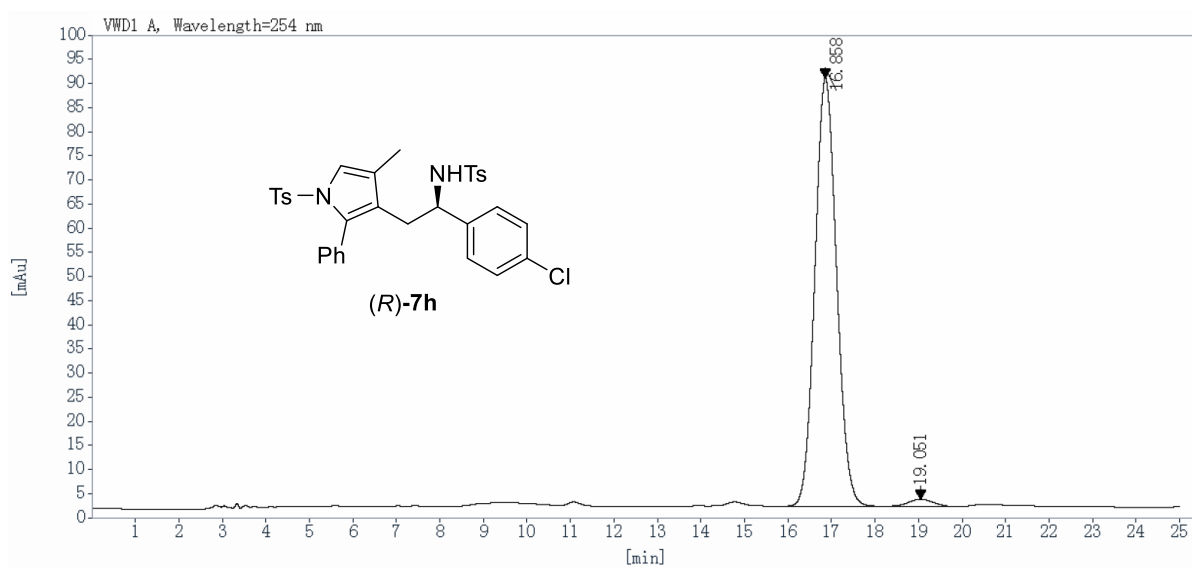

| Ret Time [min] | Peak Type | Width [min] | Height [mAU] | Area [mAU*s] | Area [%] |
|----------------|-----------|-------------|--------------|--------------|----------|
| 16.858         | BB        | 0.54        | 168.9910     | 5843.0757    | 98.1324  |
| 19.051         | BB        | 0.59        | 2.8021       | 111.2027     | 1.8676   |
| Totals:        |           |             |              | 5954.2784    | 100.0000 |

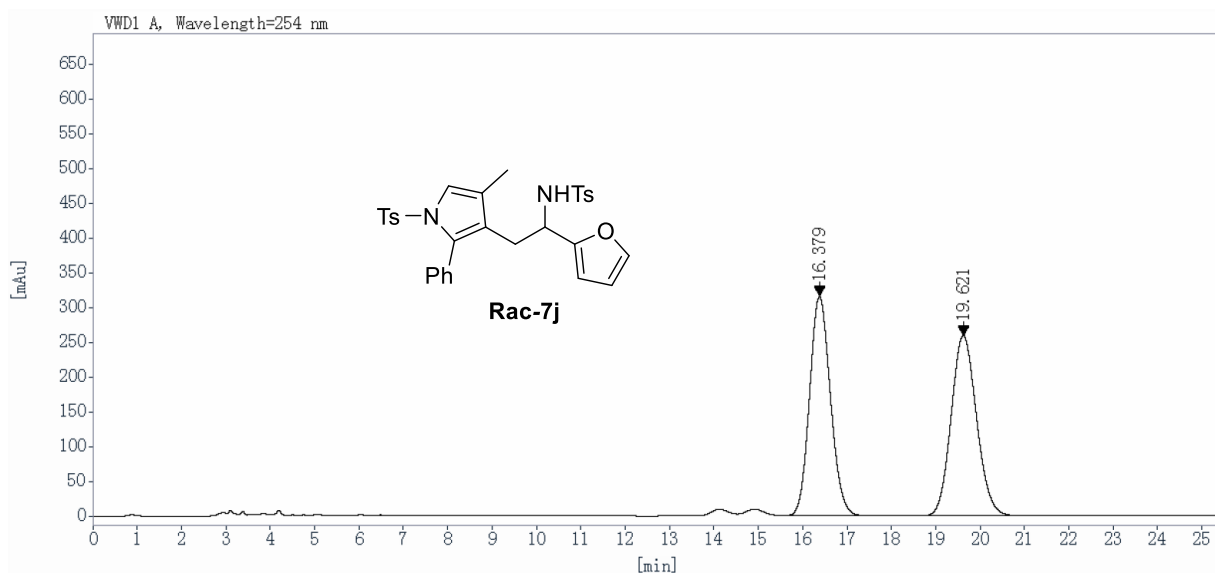

| Ret Time [min] | Peak Type | Width [min] | Height [mAU] | Area [mAU*s] | Area [%] |
|----------------|-----------|-------------|--------------|--------------|----------|
| 16.379         | BBA       | 0.51        | 315.9218     | 10308.7559   | 49.9784  |
| 19.621         | BBA       | 0.62        | 260.1114     | 10317.6748   | 50.0216  |
| Totals:        |           |             |              | 20626.4307   | 100.0000 |

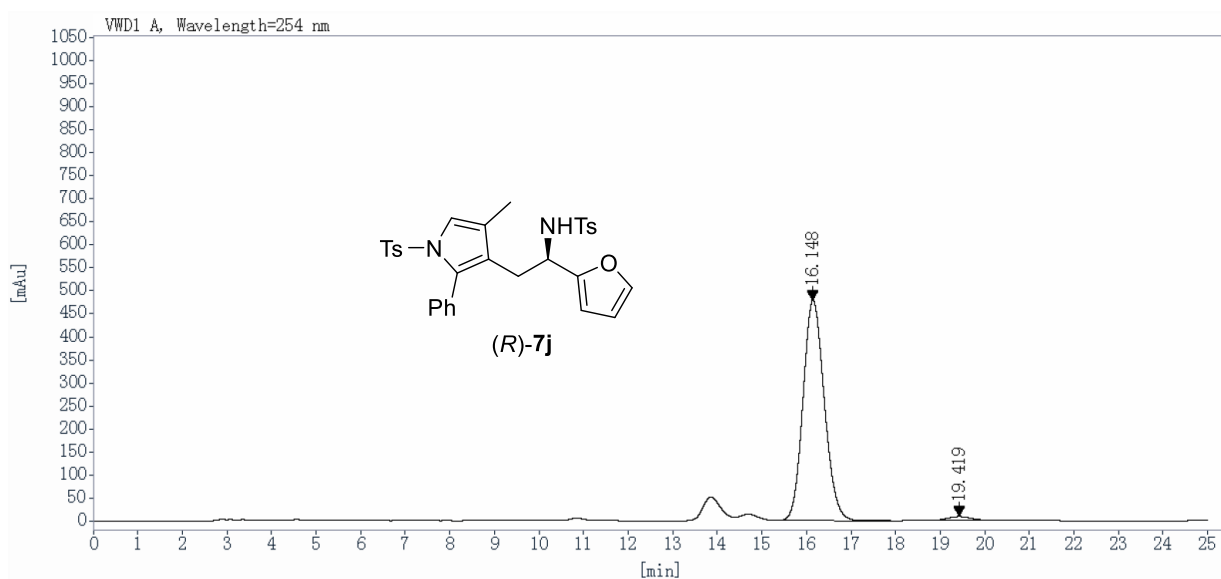

| Ret Time [min] | Peak Type | Width [min] | Height [mAU] | Area [mAU*s] | Area [%] |
|----------------|-----------|-------------|--------------|--------------|----------|
| 16.148         | BB        | 0.51        | 479.6103     | 15890.9863   | 97.9198  |
| 19.419         | BB        | 0.60        | 8.7166       | 337.5786     | 2.0802   |
| Totals:        |           |             |              | 16228.5649   | 100.0000 |

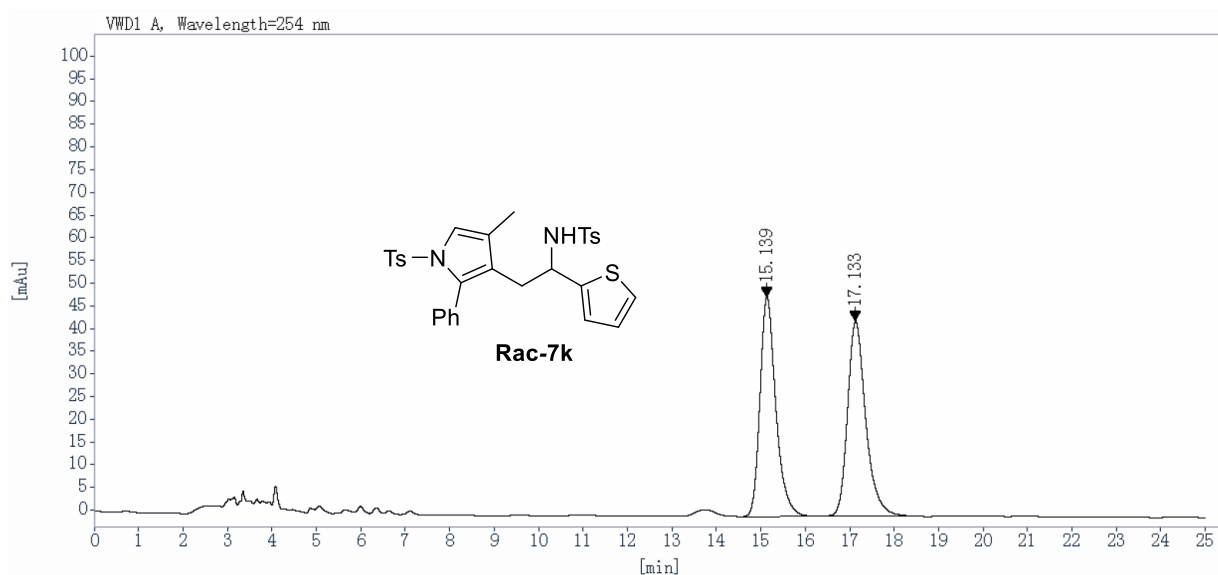

| Ret Time [min] | Peak Type | Width [min] | Height [mAU] | Area [mAU*s] | Area [%] |
|----------------|-----------|-------------|--------------|--------------|----------|
| 15.139         | BB        | 0.37        | 48.3045      | 1194.7423    | 49.5461  |
| 17.133         | BBA       | 0.43        | 42.9382      | 1216.6317    | 50.4539  |
| Totals:        |           |             |              | 2411.3740    | 100.0000 |

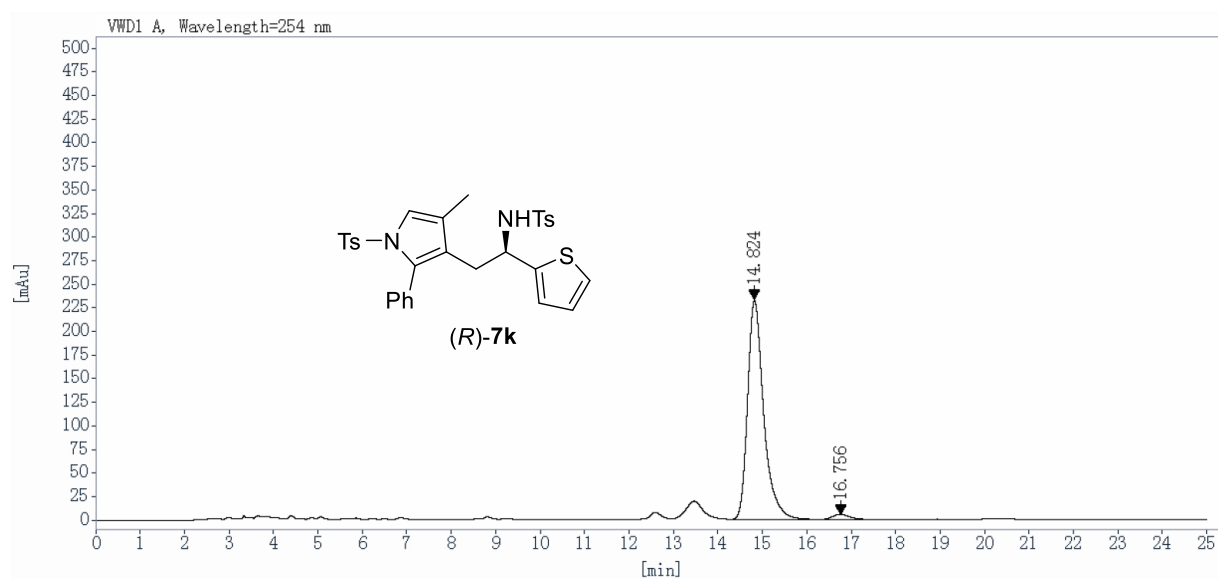

| Ret Time [min] | Peak Type | Width [min] | Height [mAU] | Area [mAU*s] | Area [%] |
|----------------|-----------|-------------|--------------|--------------|----------|
| 14.824         | BB        | 0.38        | 232.6911     | 5829.2886    | 97.5254  |
| 16.756         | BBA       | 0.41        | 5.4741       | 147.9142     | 2.4746   |
| Totals:        |           |             |              | 5977.2028    | 100.0000 |

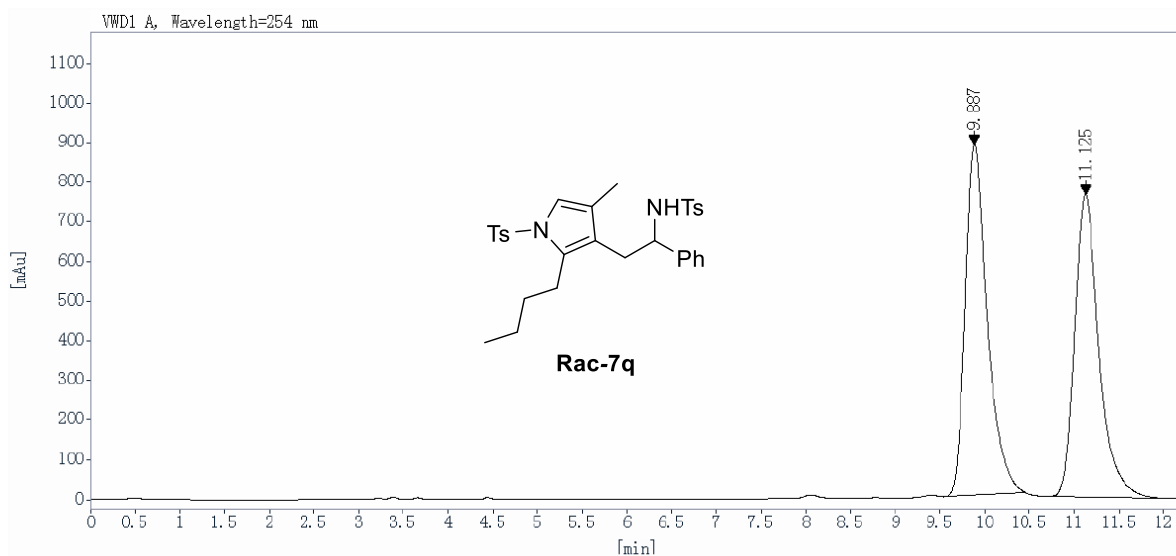

| Ret Time [min] | Peak Type | Width [min] | Height [mAU] | Area [mAU*s] | Area [%] |
|----------------|-----------|-------------|--------------|--------------|----------|
| 9.887          | BBA       | 0.25        | 884.7026     | 15068.9658   | 51.4267  |
| 11.125         | BBA       | 0.28        | 762.0808     | 14232.8711   | 48.5733  |
| Totals:        |           |             |              | 29301.8369   | 100.0000 |

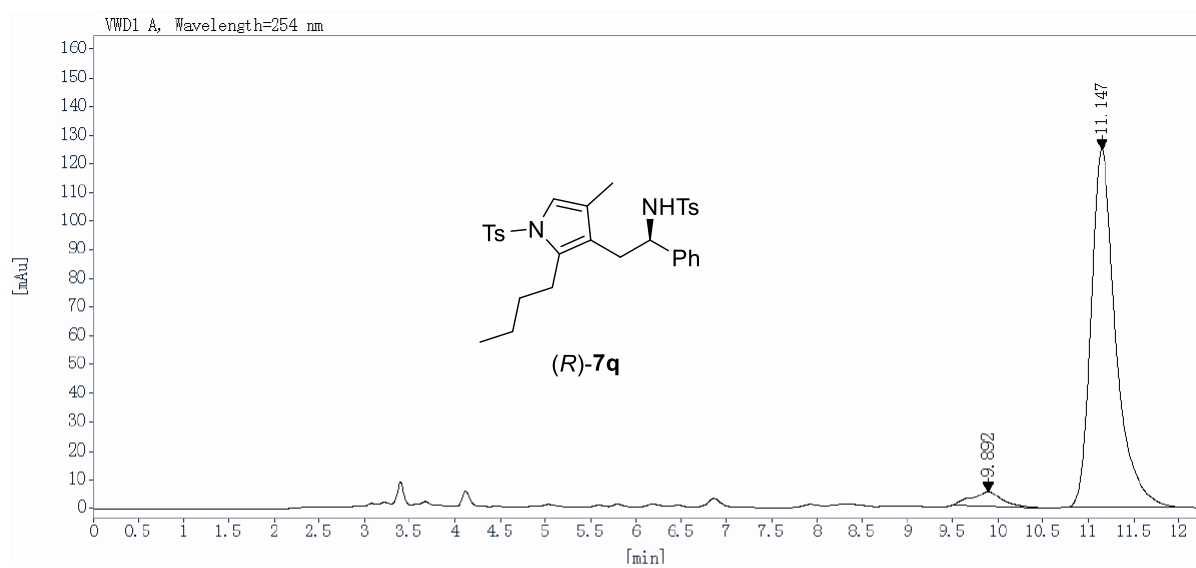

| Ret Time [min] | Peak Type | Width [min] | Height [mAU] | Area [mAU*s] | Area [%] |
|----------------|-----------|-------------|--------------|--------------|----------|
| 9.892          | BBA       | 0.31        | 5.2062       | 118.1341     | 4.7788   |
| 11.147         | BBA       | 0.28        | 124.6378     | 2353.9263    | 95.2212  |
| Totals:        |           |             |              | 2472.0604    | 100.0000 |

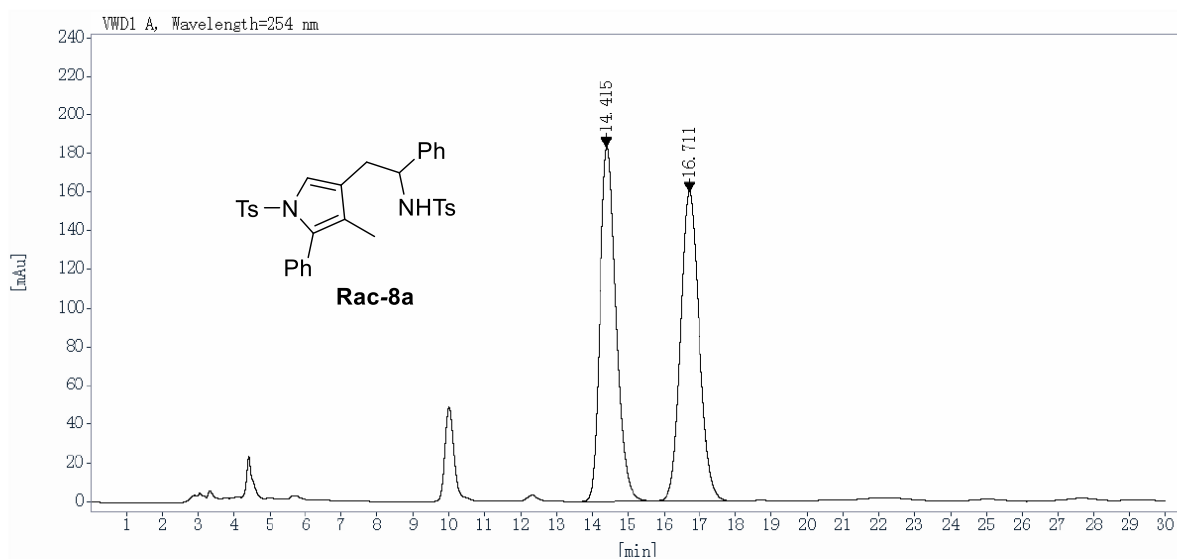

| Ret Time [min] | Peak Type | Width [min] | Height [mAU] | Area [mAU*s] | Area [%] |
|----------------|-----------|-------------|--------------|--------------|----------|
| 14.415         | BB        | 0.48        | 182.9412     | 5669.3901    | 49.7027  |
| 16.711         | BB        | 0.56        | 159.5419     | 5737.2061    | 50.2973  |
| Totals:        |           |             |              | 11406.5962   | 100.0000 |

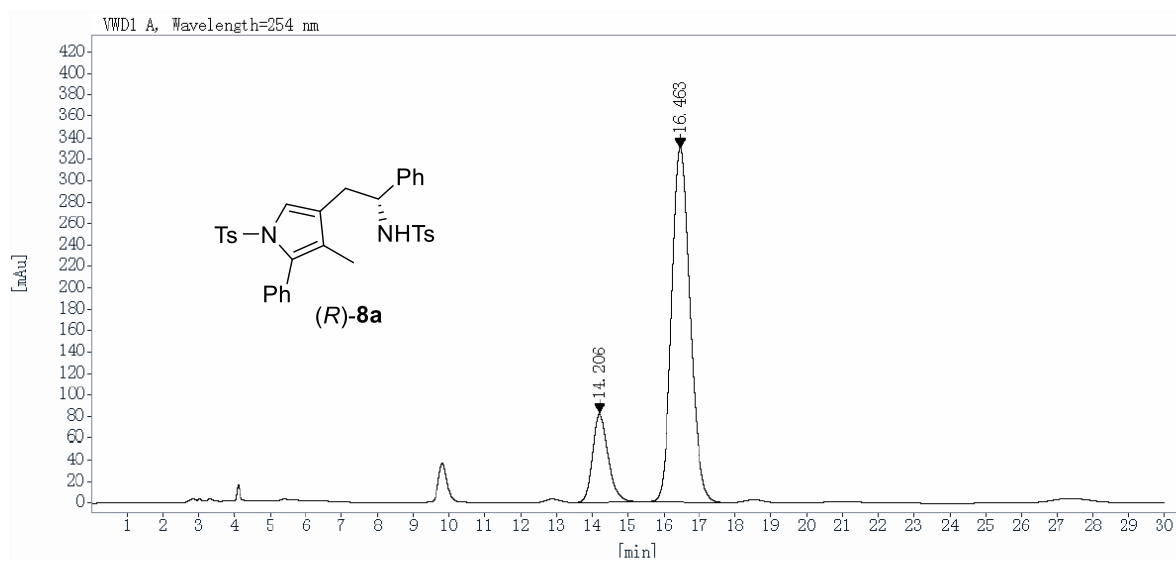

| Ret Time [min] | Peak Type | Width [min] | Height [mAU] | Area [mAU*s] | Area [%] |
|----------------|-----------|-------------|--------------|--------------|----------|
| 14.206         | BB        | 0.47        | 81.9122      | 2508.2964    | 17.6404  |
| 16.463         | BBA       | 0.55        | 329.7209     | 11710.7334   | 82.3596  |
| Totals:        |           |             |              | 14219.0298   | 100.0000 |

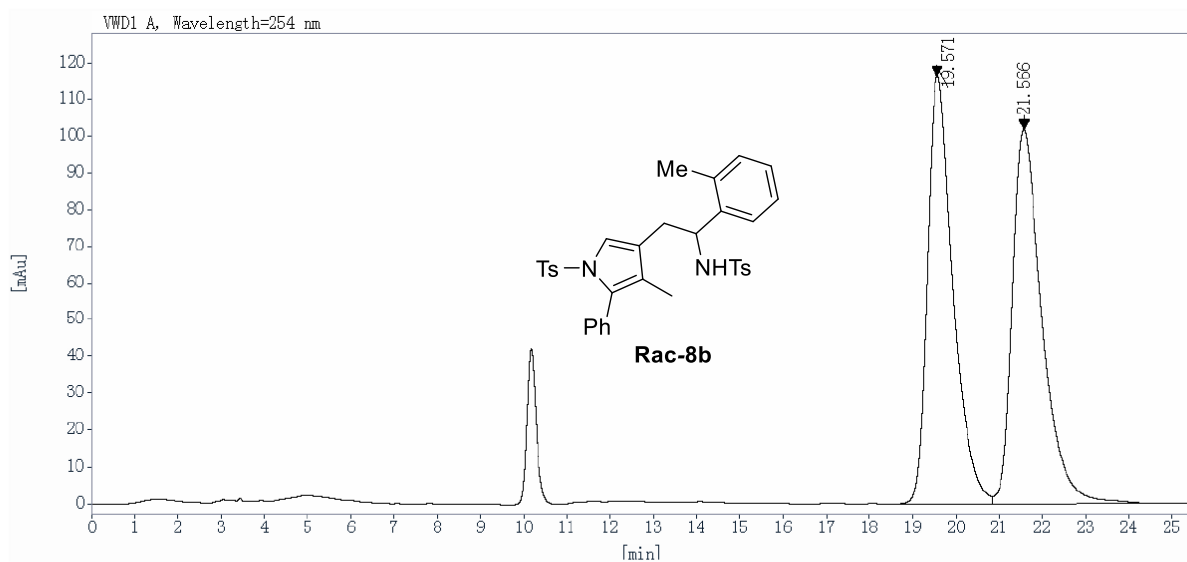

| Ret Time [min] | Peak Type | Width [min] | Height [mAU] | Area [mAU*s] | Area [%] |
|----------------|-----------|-------------|--------------|--------------|----------|
| 19.571         | BV        | 0.61        | 116.5011     | 4758.4785    | 49.5538  |
| 21.566         | VBA       | 0.72        | 101.7727     | 4844.1816    | 50.4462  |
| Totals:        |           |             |              | 9602.6602    | 100.0000 |

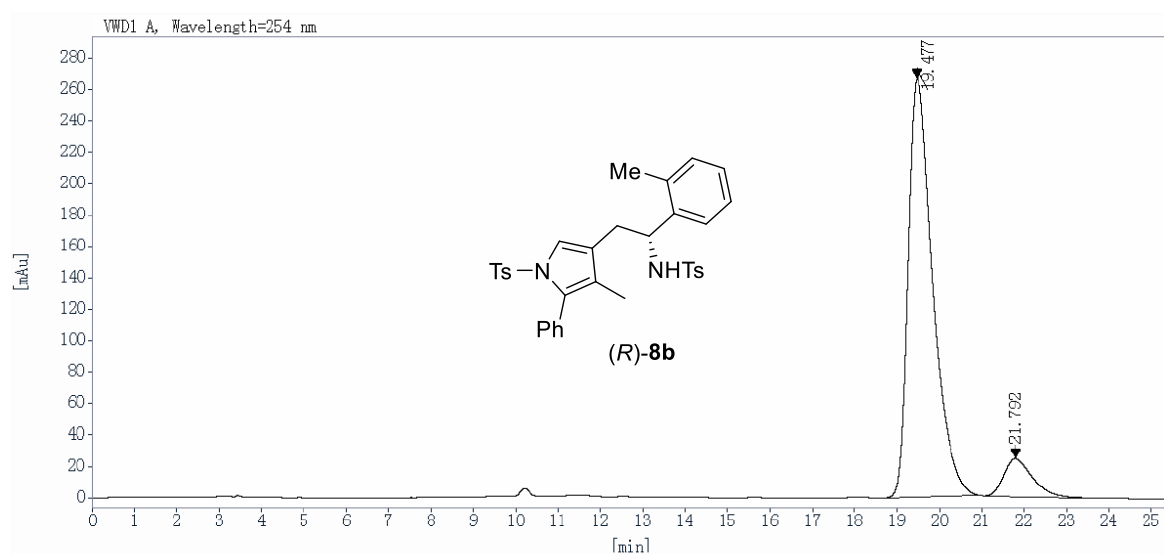

| Ret Time [min] | Peak Type | Width [min] | Height [mAU] | Area [mAU*s] | Area [%] |
|----------------|-----------|-------------|--------------|--------------|----------|
| 19.477         | BBA       | 0.61        | 266.5908     | 10715.5400   | 90.4177  |
| 21.792         | BBA       | 0.71        | 24.2748      | 1135.6184    | 9.5823   |
| Totals:        |           |             |              | 11851.1584   | 100.0000 |

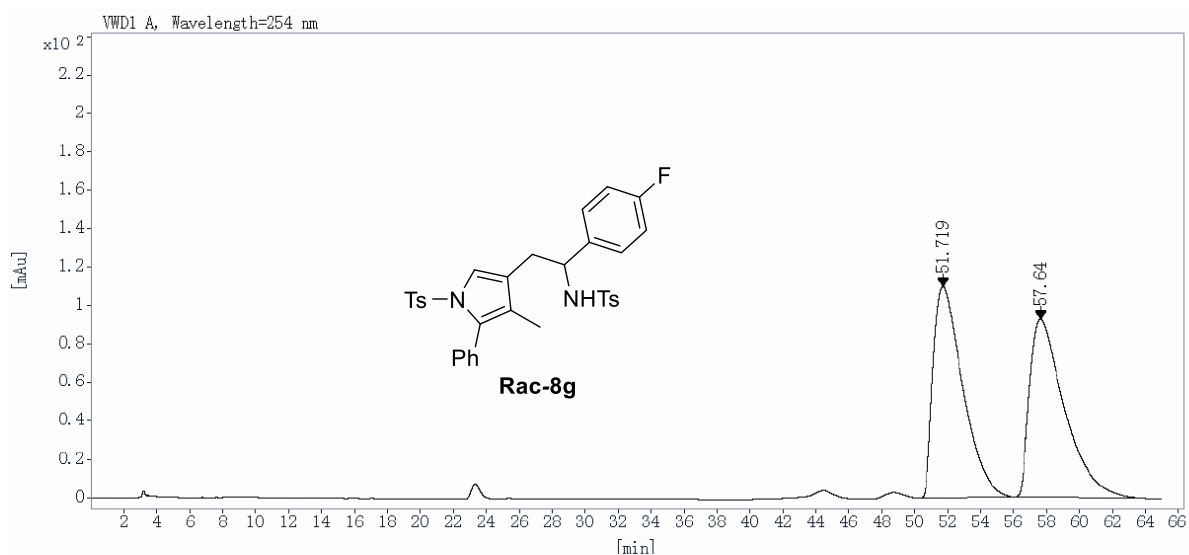

| Ret Time [min] | Peak Type | Width [min] | Height [mAU] | Area [mAU*s] | Area [%] |
|----------------|-----------|-------------|--------------|--------------|----------|
| 51.719         | BB        | 1.87        | 109.6363     | 13736.9482   | 50.2929  |
| 57.640         | BBA       | 2.17        | 92.2946      | 13576.9326   | 49.7071  |
| Totals:        |           |             |              | 27313.8809   | 100.0000 |

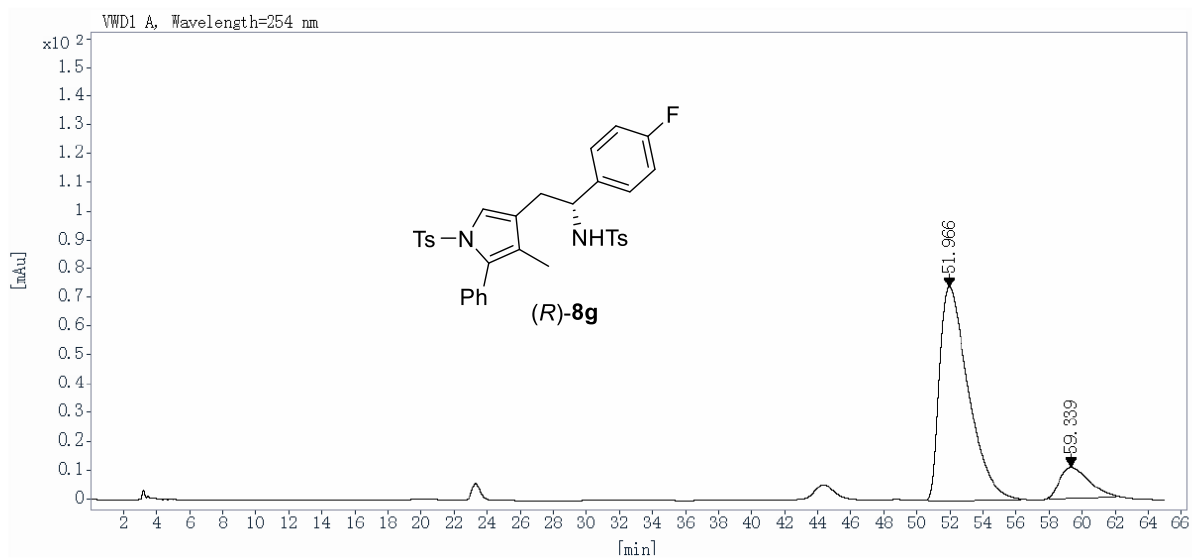

| Ret Time [min] | Peak Type | Width [min] | Height [mAU] | Area [mAU*s] | Area [%] |
|----------------|-----------|-------------|--------------|--------------|----------|
| 51.966         | MM        | 2.01        | 74.1474      | 8934.3047    | 86.8233  |
| 59.339         | MM        | 2.10        | 10.7680      | 1355.9113    | 13.1767  |
| Totals:        |           |             |              | 10290.2159   | 100.0000 |

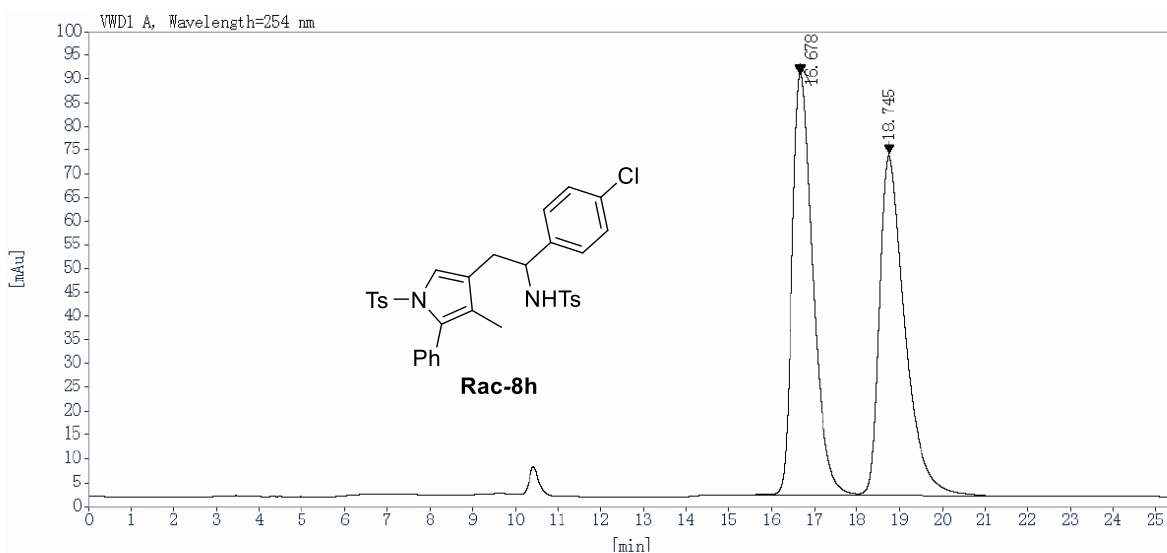

| Ret Time [min] | Peak Type | Width [min] | Height [mAU] | Area [mAU*s] | Area [%] |
|----------------|-----------|-------------|--------------|--------------|----------|
| 16.678         | BV        | 0.51        | 264.9188     | 8883.4336    | 50.0244  |
| 18.745         | VBA       | 0.63        | 214.0126     | 8874.7598    | 49.9756  |
| Totals:        |           |             |              | 17758.1934   | 100.0000 |

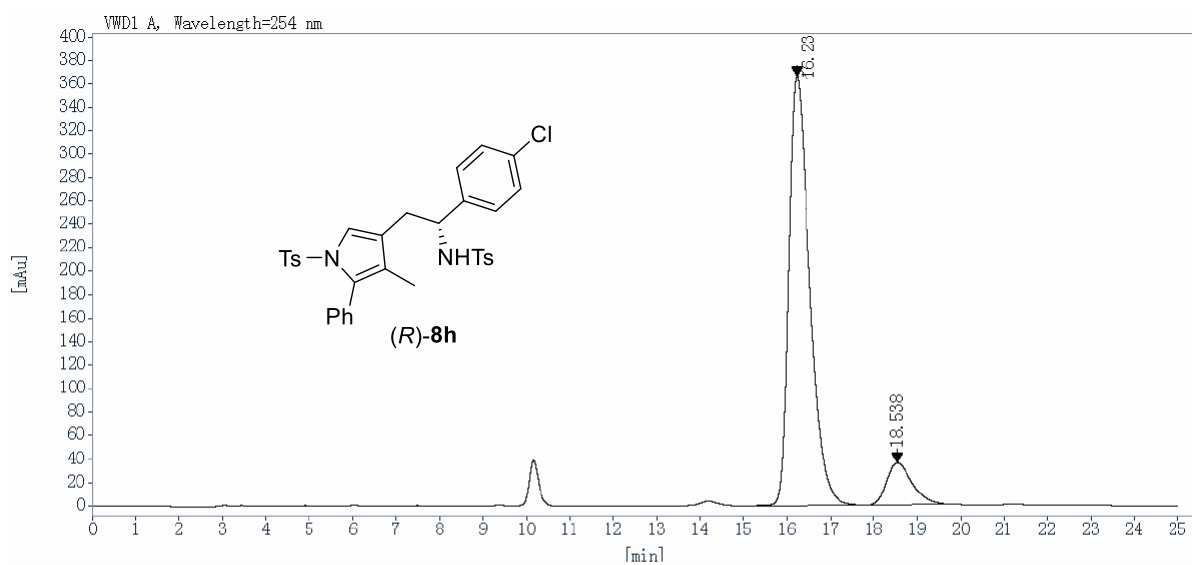

| Ret Time [min] | Peak Type | Width [min] | Height [mAU] | Area [mAU*s] | Area [%] |
|----------------|-----------|-------------|--------------|--------------|----------|
| 16.230         | BB        | 0.51        | 365.9899     | 12054.0117   | 89.0774  |
| 18.538         | BBA       | 0.62        | 36.0112      | 1478.0463    | 10.9226  |
| Totals:        |           |             |              | 13532.0580   | 100.0000 |
